# Supplementary material
Source: publisher figshare collection journal article supplement (https://gsapubs.figshare.com/articles/dataset/_/24492364)
Supplement: Supplementary file 1 [file 1]

## Sheet: Table S1 Mixed and H2O2
SAMPLES	Aragonite	Dolomite	Calcite	N	δ13C (‰)	SD (‰)	SE (‰)	δ18O (‰)	SD (‰)	SE (‰)	Δ47 (CDES) (‰)	SD (‰)	SE (‰)	Δ48 (CDES) (‰)	SD (‰)	SE (‰)
DCMIX-0	-	0.612543	0.38739	7	2.16051	0.0710528	0.0268554	-3.67791	0.124201	0.0469436	0.422212	0.0186562	0.00705138	0.16256	0.0134887	0.00509826
DCMIX-1	-	0.785977	0.214004	8	2.24955	0.035172	0.0124352	-5.09277	0.127771	0.0451737	0.489127	0.0184971	0.00653971	0.189894	0.01384	0.00489316
DCMIX-2	-	0.527098	0.472887	7	2.21776	0.0422463	0.0159676	-4.48551	0.189194	0.0715087	0.456358	0.021053	0.0079573	0.165429	0.0155739	0.00588639
DCMIX-6	-	0.950389	0.0495275	8	2.25419	0.0521131	0.0184248	-4.85383	0.142603	0.0504176	0.484174	0.0197134	0.00696975	0.19889	0.0233845	0.00826768
DSMIX00	-	0.0952302	0.904739	7	2.04251	0.0439368	0.0166065	-2.22344	0.161551	0.0610604	0.371278	0.0205401	0.00776343	0.146308	0.016998	0.00642465
NIST-88b	-	1	0	8	2.25181	0.056839	0.0200956	-5.8777	0.123715	0.04374	0.521102	0.0165778	0.00586114	0.193919	0.0145035	0.00512776
CARARRA	-	0	1	15	1.91724	0.0566768	0.0146339	-1.56792	0.13972	0.0360756	0.309852	0.0306443	0.00791232	0.145123	0.0210223	0.00542794
Clino-1885.42-2AW-24h	-	1	0	4	3.45671	0.044306	0.0198142	4.34573	0.0928134	0.0415074	0.630238	0.00663275	0.00296626	0.196084	0.0151698	0.00678414
Clino-1885.42-2AW-12h	-	1	0	5	3.50578	0.0370815	0.0165834	4.35124	0.0966987	0.043245	0.621658	0.013576	0.00607135	0.200143	0.0290692	0.0130001
Echino	-	-	-	5	-0.228371	0.164311	0.0734822	-0.0813473	0.0679642	0.0303945	0.629187	0.00822686	0.00367916	0.214839	0.0186561	0.00834328
Echino 12h	1	-	-	4	-0.123071	0.0269873	0.0134936	0.00725064	0.0663622	0.0331811	0.628729	0.0136732	0.0068366	0.213899	0.0338412	0.0169206
Echino 24h	1	-	-	4	-0.143305	0.0456728	0.0228364	-0.00456883	0.0686155	0.0343077	0.626927	0.0139699	0.00698496	0.229962	0.00790845	0.00395422

## Sheet: Table S2 Gas-water standards
ID	Types	δ18O (SMOW)	SD (‰)
Tank A	Gas standard	15.2	0.05
Tank D	Gas standard	-8.37	0.05
LS3	Water standard	-9.97	0.01
LS9	Water standard	-0.83	0.01
LS10	Water standard	12.35	0.01
IAEA OH25	Water standard	-16.98	0.02
IAEA OH27	Water standard	-25.2	0.04

## Sheet: Table S3 ETH standards
Samples	N	Δ47 (CDES) (‰)	SD	SE	95cf	Δ47 (I-CDES)	SD	SE	95cf	Δ48 (CDES)(‰)	SD	SE	95cf
ETH-1	60	0.211875	0.0261677	0.00370067	0.00725318	0.211179	0.01948	0.00275489	0.00539949	0.131107	0.0313543	0.00443417	0.00869082
ETH-2	61	0.214616	0.0269505	0.00373737	0.0073251	0.210304	0.0214359	0.00297262	0.00582623	0.146766	0.0337754	0.00463941	0.00909307
ETH-3	56	0.622298	0.0196248	0.00289351	0.00567118	0.613251	0.018793	0.00277088	0.00543082	0.238922	0.0308538	0.00454915	0.00891617
ETH-4	57	0.452291	0.0182073	0.00262799	0.00515077	0.44282	0.0157292	0.00227031	0.00444973	0.200136	0.0342004	0.00488577	0.00957594

## Sheet: Table S4 Clino D47-D48
ID	Sample	Meter (m)	Mole% Mg	Ordering	N	δ13C (‰)	δ18O (‰)	Δ47 (CDES) (‰)	SD (‰)	SE (‰)	Δ47-temp (°C)	SD (°C)	SE (°C)	Δ48 (CDES) (‰)	SD (‰)	SE (‰)	Δ48-temp (°C)	SD (°C)	SE (°C)	95% confidence(°C)
CLINO-1204.42	Bulk	367.107	-	-	3	2.25023	1.89052	0.603956	0.0310946	0.0179525	19.2117	3.22074	1.8595	0.244578	0.0258462	0.0149223	30.0406	24.8072	14.3224	28.0715
CLINO-1207.67	Bulk	368.098	-	-	1	3.28536	2.28796	0.607427	-	-	22.1841	-	-	0.265757	-	-	9.48782	-	-
CLINO-1211	Bulk	369.113	-	-	1	3.59377	2.62556	0.626765	-	-	16.028	-	-	0.260595	-	-	13.684	-	-
CLINO-1213.41	Bulk	369.847	-	-	2	3.23646	1.80546	0.601637	0.0357288	0.0252641	17.894	2.69791	1.90771	0.217959	0.00321915	0.00227629	57.4408	4.09477	2.89544	5.67495
CLINO-1215	Bulk	370.332	-	-	2	3.01909	1.22957	0.631042	0.00746445	0.00527816	14.7313	2.27141	1.60613	0.25041	0.0165191	0.00825957	23.4372	15.6168	7.8084	21.6434
CLINO-1226.67	Bulk	373.889	-	-	1	3.33289	1.89047	0.62391	-	-	16.9128	-	-	0.24497	-	-	27.6214	-	-
CLINO-1231.85	Bulk	375.468	-	-	2	3.18707	1.65198	0.607905	0.00427293	0.00302142	22.0322	1.40175	0.991188	0.260311	0.00935907	0.00661786	14.0789	7.8033	5.51776	10.8146
CLINO-1243.08	Bulk	378.891	-	-	4	3.71685	2.59589	0.603536	0.0163026	0.00815131	18.1374	5.16389	2.58195	0.256207	0.0173024	0.00773786	15.2778	18.676	8.35218	18.3022
CLINO-1783.25	Bulk	543.535	-	-	1	2.8527	2.30182	0.644888	-	-	10.5952	-	-	0.207417	-	-	71.6848	-	-
CLINO-1796.8	Bulk	547.665	-	-	1	3.00724	3.36665	0.620423	-	-	18.0044	-	-	0.186499	-	-	106.54	-	-
CLINO-1885.42	Bulk	574.676	-	-	1	2.55156	1.71105	0.639556	-	-	12.1618	-	-	0.234433	-	-	38.2541	-	-
CLINO-1872	Bulk	570.586	-	-	1	2.85937	2.17618	0.615691	-	-	19.5056	-	-	0.193349	-	-	93.9876	-	-
CLINO-1897.08	Bulk	578.23	-	-	1	2.68078	2.15057	0.641348	-	-	11.6323	-	-	0.181591	-	-	116.368	-	-
CLINO-1927.62	Bulk	587.539	-	-	1	2.71196	1.58121	0.612422	-	-	20.5564	-	-	0.217541	-	-	58.0228	-	-
CLINO-1977.42	Bulk	602.718	-	-	1	2.61274	1.6903	0.636022	-	-	13.2144	-	-	0.175962	-	-	128.639	-	-
CLINO-1956.16	Bulk	596.238	-	-	2	3.43942	3.16224	0.601543	0.0272689	0.019282	17.4356	0.625567	0.442342	0.235062	0.00903828	0.00639103	37.8083	9.56012	6.76002	13.2494
CLINO-2026.58	Bulk	617.702	-	-	3	3.08192	1.83573	0.605082	0.0239698	0.013839	18.8022	1.34096	0.774204	0.214672	0.00828709	0.00478455	62.0232	10.9674	6.33201	12.4105
CLINO-2078	Bulk	633.374	-	-	2	2.88668	1.69847	0.591546	0.0232724	0.0164561	20.8076	1.67984	1.18783	0.227449	0.00238072	0.00168342	45.975	2.72421	1.9263	3.77549
CLINO-2102.08	Bulk	640.714	-	-	3	2.82176	1.19564	0.593232	0.0216038	0.0124729	22.4892	2.93454	1.69426	0.210443	0.0213869	0.0151228	69.3667	30.0283	21.2332	33.9796
CLINO-2128.17	Bulk	648.66	-	-	2	2.86645	1.78356	0.595032	0.0242601	0.0140066	22.4412	2.08787	1.20543	0.252031	0.0028003	0.00198011	21.0921	2.5117	1.77604	2.84221
CLINO-2177	Bulk	663.55	-	-	2	2.62922	1.8721	0.599302	0.0281838	0.019929	25.1186	9.52935	6.73827	0.22084	0.0220619	0.0156001	55.5064	27.386	19.3649	37.9544
CLINO-1204.42-2AW	Leached	367.107	42.5168	0.497925	8	3.03653	4.01447	0.597443	0.012397	0.004383	25.5995	4.27891	1.51282	0.201796	0.0232571	0.00822262	85.3472	39.1549	13.8433	27.1324
CLINO-1207.67-2AW	Leached	368.098	43.9639	0.402831	7	3.97774	3.90421	0.596312	0.0183639	0.0069409	26.0775	6.38938	2.41496	0.192089	0.0282758	0.0106873	105.688	54.2038	20.4871	40.154
CLINO-1211-2AW	Leached	369.113	44.5118	0.518987	10	4.13763	3.7091	0.582889	0.0140021	0.00442786	27.5716	4.9775	1.75981	0.178411	0.0214744	0.00679081	130.434	45.5355	14.3996	28.2227
CLINO-1213.41-2AW	Leached	369.847	42.938	0.440129	7	4.04213	3.46527	0.619645	0.0259389	0.00980396	18.5248	7.67307	2.90015	0.206217	0.0268507	0.0101486	79.1838	39.9398	15.0958	29.5873
CLINO-1215-3AW	Leached	370.332	43.3491	0.576642	8	4.41238	4.31776	0.618829	0.013914	0.00491936	18.595	4.42164	1.56329	0.18851	0.0227673	0.00804944	108.856	41.5231	14.6806	28.7735
CLINO-1226.67-2AW	Leached	373.889	43.021	0.410326	7	4.01963	3.34996	0.616228	0.00650118	0.00245721	19.353	2.06653	0.781076	0.234525	0.0115045	0.00434829	38.7591	11.9656	4.52259	8.86411
CLINO-1231.85-2AW	Leached	375.468	43.3045	0.486667	7	4.10991	3.43802	0.610534	0.0123263	0.00465892	21.2389	4.02677	1.52198	0.24566	0.0263637	0.00996456	29.6348	24.9302	9.42275	18.4682
CLINO-1243.08-2AW	Leached	378.891	42.8192	0.299648	8	4.45163	4.07853	0.61595	0.017918	0.00633496	19.5706	5.75562	2.03492	0.236121	0.0181295	0.00640976	37.9685	18.6436	6.59152	12.9191
CLINO-1783.25-2AW	Leached	543.535	43.5485	0.543179	7	3.21372	4.59704	0.631396	0.0124565	0.00470811	14.6742	3.79176	1.43315	0.20699	0.0223781	0.00845815	76.8984	37.8301	14.2984	28.0244
CLINO-1796.8-2AW	Leached	547.665	44.5742	0.604369	7	3.22516	4.70961	0.610421	0.0198792	0.00751361	21.3909	6.56784	2.48241	0.178685	0.0175637	0.00663845	127.89	42.6031	16.1024	31.5602
CLINO-1885.42-2AW	Leached	574.676	44.5389	0.500711	7	3.40322	4.30905	0.620438	0.0224186	0.00847342	18.2315	7.3993	2.79667	0.186937	0.0149354	0.00564507	108.339	27.5126	10.3988	20.3812
CLINO-1872-2AW	Leached	570.586	44.7535	0.481293	8	3.46023	4.56348	0.6053	0.0165152	0.00583902	23.018	5.48041	1.93762	0.176766	0.0129979	0.00459546	129.735	30.4704	10.7729	21.1145
CLINO-1897.08-2AW	Leached	578.23	44.8979	0.449743	7	3.41222	4.42595	0.623302	0.00811702	0.00306794	17.1303	2.51924	0.952185	0.173759	0.0209503	0.00791848	142.394	55.6189	21.022	41.2023
Clino-1927.62-2AW	Leached	587.539	44.4742	0.411911	8	3.60485	4.11346	0.604962	0.0131507	0.00464947	23.0812	4.34596	1.53653	0.182364	0.0173915	0.00614881	118.855	34.16	12.0774	23.6712
CLINO-1977.42-2AW	Leached	602.718	44.8882	0.557432	7	3.38135	3.45304	0.597157	0.0111027	0.00419644	25.6791	3.79545	1.43454	0.170244	0.0122232	0.00461992	145.409	31.854	12.0397	23.5973
CLINO-1956.16-2AW	Leached	596.238	44.2173	0.428928	7	3.64148	3.71893	0.613485	0.017309	0.00654218	20.3473	5.49089	2.07536	0.178528	0.010107	0.00382008	124.45	21.6308	8.17568	16.024
CLINO-2026.58-2AW	Leached	617.702	44.9099	0.408555	7	3.75724	3.56579	0.604984	0.0150902	0.00570355	23.0995	5.0408	1.90524	0.204449	0.0238475	0.0090135	80.6682	35.5483	13.436	26.3341
CLINO-2078-3AW	Leached	633.374	45.009	0.588353	8	4.14358	4.39112	0.607408	0.0130877	0.0046272	22.2731	4.33031	1.53099	0.209784	0.0119158	0.00421286	69.3648	16.365	5.78591	11.3402
CLINO-2102.08-3AW	Leached	640.714	44.2246	0.575418	8	3.87056	3.64434	0.601253	0.0103807	0.00367012	23.9924	3.43625	1.2149	0.188452	0.0170774	0.00603776	106.486	32.8022	11.5973	22.7303
CLINO-2128.15-2AW	Leached	648.66	44.6468	0.626604	8	3.72804	3.70473	0.607314	0.0241991	0.00855569	22.5076	8.0945	2.86184	0.193361	0.0237597	0.00840034	100.259	42.609	15.0645	29.526
CLINO-2177-2AW	Leached	663.55	44.528	0.587125	7	3.81802	4.14605	0.618968	0.0134262	0.00507461	18.5435	4.27308	1.61507	0.204313	0.0143172	0.00541138	78.2264	24.6192	9.30519	18.2378

## Sheet: Table S5 San Salvador D47-D48
ID	Sample	Meter (m)	Mole% Mg	Ordering	N	δ13Ccarb (‰)	δ18Ocarb (‰)	Δ47 (CDES) (‰)	SD (‰)	SE (‰)	Δ47-temp (°C)	SD (°C)	SE (°C)	95% cf (°C)	Fluid δ18Ofluid (‰)a	SD (°C)	SE (°C)	95cf (‰)	Δ48 (CDES) (‰)	SD (‰)	SE (‰)	Δ48-temp (°C)	SD (°C)	SE (°C)	95% cf (°C)	Fluid δ18Ofluid (‰)	SD (°C)	SE (°C)	95% cf (°C)
SS182.6	Bulk	55.6565	47.51	0.63	7	2.44322	2.74408	0.605377	0.014326	0.0054147	22.9545	4.60811	1.7417	3.41367	0.472707	1.13393	0.428584	0.840008	0.244185	0.01492	0.00563922	29.2442	14.1705	5.35596	15.1754	0.588793	2.56202	1.47919	2.89915
SS186.6	Bulk	56.8757	47.8055	0.656336	7	2.41535	3.13633	0.608123	0.0220159	0.00832124	22.1889	7.40368	2.79833	5.48462	0.150026	1.16811	0.441503	0.86533	0.248892	0.0114783	0.00433839	24.4383	10.9915	4.15439	6.09321	-0.276499	2.28378	1.02134	2.00179
SS187.3	Bulk	57.089	48.3018	0.717808	8	2.46334	3.37068	0.601457	0.01487	0.00525735	24.2767	5.0503	1.78555	3.49961	1.41676	1.45822	0.515558	1.01047	0.252584	0.00987815	0.00349245	20.9339	8.93437	3.15878	13.1881	0.271147	3.33766	1.49264	2.92553
SS190.3	Bulk	58.0034	49.7325	0.754563	4	2.58154	3.73434	0.614177	0.00436697	0.00218348	19.9985	1.40109	0.700545	1.37304	0.745339	0.327557	0.163778	0.321	0.251179	0.0156907	0.00784533	22.6351	14.607	7.30349	14.3146	-0.548446	9.26706	18.3775	9.08155
SS192.3	Bulk	58.613	49.6791	0.735523	8	1.94504	3.5017	0.621209	0.0188379	0.0066602	17.9193	6.0579	2.14179	4.19783	0.446771	2.94407	1.04089	2.0401	0.246083	0.0103536	0.00366055	26.9732	9.62919	3.40443	17.2845	0.800166	4.57386	2.28693	4.4823
SS193.5	Bulk	58.9788	47.9687	0.704453	7	2.42098	3.56057	0.62231	0.0211329	0.0079875	17.6057	6.62001	2.50213	4.90408	-0.0865534	1.97761	0.747467	1.46501	0.248454	0.00942116	0.00356086	24.6697	8.79573	3.32447	6.54473	1.64057	1.42195	0.635916	1.24637
SS198.5	Bulk	60.5028	49.4471	0.844098	6	2.0578	3.71134	0.605987	0.00749346	0.00305919	22.6841	2.4857	1.01478	1.98894	2.07012	2.28767	0.933937	1.83048	0.247838	0.0138513	0.00565478	25.6021	12.789	5.22107	11.5521	0.36298	1.92844	1.11339	2.18219
SS205	Bulk	62.484	50.0111	0.799003	8	2.25419	3.53565	0.614701	0.0131659	0.00465486	19.904	4.28743	1.51584	2.97099	0.505326	1.29966	0.459499	0.900601	0.239438	0.0140855	0.00497999	33.8946	15.6198	5.52244	11.52	1.77228	3.31692	1.48337	2.90736
SS212.9	Bulk	64.8919	49.2748	0.839039	6	2.34348	3.85913	0.60492	0.00969647	0.00395857	23.0545	3.1912	1.3028	2.55344	1.62234	1.17828	0.48103	0.942801	0.245657	0.0156093	0.00637247	27.93	15.5369	6.34291	13.6602	1.24101	1.98233	1.1445	2.24317
a. The fluid oxygen isotopes were calculated by the equation of Horita (2014)
Horita, J., 2014. Oxygen and carbon isotope fractionation in the system dolomite–water–CO2 to elevated temperatures. Geochimica et Cosmochimica Acta, 129: 111-124.

## Sheet: Table S6 Samples D47
Sample	Run ID	Date	δ13C	sd	se	δ18O	sd	se	δ45CO2	sd	se	δ46CO2	sd	se	δ47CO2	sd	se	δ48CO2	sd	se	δ49CO2	sd	se	Δ47CO2	sd	se	Δ48CO2	sd	se	Δ49CO2	sd	se	Heated Slope	25C Slope	50C Slope	Slope Average	heated Intercept	25C intercept	50C intercept	ETF Slope	ETF Intercept	Δ47 SGvsWG	Δ47 (CDES) (‰)	TEMP.	Δ47 (ICDES) (‰)
PL5732	CLINO-1204.42-2AW	03/09/22	2.8419	0.0297386	0.00197818	3.94787	0.0553367	0.00368095	20.4346	0.0297386	0.00197818	21.0426	0.0553367	0.00368095	41.8578	0.111592	0.00743944	42.1534	0.367441	0.0244961	46.4562	12.8998	0.859984	-0.339118	0.111343	0.00740645	-0.359106	0.366624	0.0243874	-16.9284	12.8711	0.85617	-0.00036694	-0.000466169	-0.000468268	-0.000433792	-0.852699	0.00384712	-0.114379	1.05088	0.923006	-0.320961	0.585714	29.5874	0.581161
PL5763	CLINO-1204.42-2AW	03/15/22	2.9185	0.00766313	0.000509744	4.08224	0.0130956	0.000871105	20.5121	0.00766313	0.000509744	21.1782	0.0130956	0.000871105	42.1158	0.0841347	0.00560898	43.1664	0.415544	0.0277029	139.717	26.628	1.7752	-0.300481	0.0839475	0.0055841	0.346853	0.414619	0.0275801	70.3171	26.5687	1.76733	-0.000231482	-0.000182164	-0.000208724	-0.000207457	-0.87104	0.0109868	-0.115505	1.02274	0.918172	-0.291744	0.619795	18.2024	0.634416
PL5778	CLINO-1204.42-2AW	03/18/22	2.8724	0.00950738	0.000706678	3.98891	0.0156505	0.00116329	20.465	0.00950738	0.000706678	21.084	0.0156505	0.00116329	41.985	4.15339	0.286611	42.5567	15.2137	1.04985	206.582	152.946	10.5543	-0.32773	0.0959777	0.00713397	0.74041	0.56437	0.0419493	136.188	52.9331	3.93448	-0.000103857	-0.000183559	-0.000143449	-0.000143622	-0.87104	0.0105429	-0.112613	1.02173	0.917011	-0.3217	0.58832	28.6694	0.592737
PL5785	CLINO-1204.42-2AW	03/19/22	2.83965	0.0122056	0.000871826	3.91759	0.0208384	0.00148846	20.4314	0.0122056	0.000871826	21.0121	0.0208384	0.00148846	41.8779	0.09244	0.00661977	43.1223	0.600153	0.0429779	183.635	47.2266	3.38197	-0.287251	0.0922027	0.00658591	0.630108	0.598612	0.042758	112.011	47.1053	3.36467	-6.13151e-05	-0.000184024	-0.000121691	-0.000122343	-0.87104	0.010395	-0.111649	1.02139	0.916623	-0.282127	0.628461	15.5065	0.636336
PL5833	CLINO-1204.42-2AW	03/31/22	2.85017	0.00734401	0.000488517	3.90964	0.0133917	0.000890801	20.4411	0.00734401	0.000488517	21.0041	0.0133917	0.000890801	41.8734	0.0907061	0.00604707	43.137	0.591756	0.0394504	286.33	57.8414	3.85609	-0.293699	0.0905043	0.00602025	0.659846	0.590439	0.0392754	208.497	57.7127	3.83899	0.000449185	-0.000189604	0.000139409	0.000132997	-0.87104	0.00861959	-0.100081	1.01709	0.911908	-0.299268	0.607526	22.1514	0.589721
PL7113	CLINO-1204.42-2AW	05/07/23	2.93589	0.00850988	0.000632534	4.07572	0.012693	0.000943464	20.5284	0.00850988	0.000632534	21.1717	0.012693	0.000943464	42.0725	0.0849973	0.00633533	41.9846	0.443785	0.0330778	31.5495	11.0262	0.821843	-0.352248	0.0847609	0.00630023	-0.773655	0.44255	0.0328945	-31.2679	10.9955	0.81729	-0.000842065	-0.000853014	-0.000857567	-0.000850882	-0.851372	-0.00504081	-0.140488	1.07267	0.94204	-0.316449	0.602596	23.7844	0.632672
PL7132	CL-1204.42-2AW	05/11/23	2.93713	0.00724894	0.000759895	4.10231	0.0107672	0.0011287	20.5305	0.00724894	0.000759895	21.1985	0.0107672	0.0011287	42.0927	0.0834023	0.00879137	42.5016	0.570536	0.0601398	44.7103	15.5436	1.63844	-0.360709	0.0829376	0.00869422	-0.330361	0.567358	0.0594753	-18.9613	15.457	1.62033	-0.000889064	-0.000805429	-0.000857567	-0.000850687	-0.858369	-0.00670144	-0.140488	1.06478	0.942493	-0.324902	0.596543	25.8264	0.624098
PL7133	CL-1204.42-2AW	05/11/23	2.94052	0.00799294	0.00102339	4.10798	0.0114387	0.00146457	20.5339	0.00799294	0.00102339	21.2042	0.0114387	0.00146457	42.1112	0.106278	0.0137204	43.0576	0.78568	0.101431	59.5129	20.3727	2.6301	-0.351972	0.105388	0.0134936	0.191519	0.779105	0.0997542	-5.07534	20.2022	2.58663	-0.000893336	-0.000801103	-0.000857567	-0.000850669	-0.859005	-0.00685241	-0.140488	1.06407	0.942533	-0.316149	0.606128	22.6117	0.632976
PL5747	CLINO-1207.67-2AW	03/12/22	3.9253	0.0241793	0.00160839	3.71703	0.0454294	0.00302192	21.4566	0.0241793	0.00160839	20.8122	0.0454294	0.00302192	42.698	0.117176	0.00781171	41.6694	0.409906	0.0273271	47.8885	13.9204	0.928029	-0.343932	0.116915	0.00777707	-0.37236	0.408994	0.0272059	-16.1965	13.8895	0.923913	-0.00036694	0.000251592	-2.89789e-05	-4.8109e-05	-0.852699	0.00731103	-0.116563	1.04918	0.922012	-0.341878	0.563321	37.838	0.558782
PL5759	CLINO-1207.67-2AW	03/14/22	3.99575	0.00630637	0.000929824	3.90108	0.0126959	0.0018719	21.53	0.00630637	0.000929824	20.9979	0.0126959	0.0018719	42.9935	0.0877206	0.0062818	42.699	0.399381	0.0286002	158.297	41.0378	2.93878	-0.30872	0.088945	0.0131142	0.339738	0.383195	0.056499	108.857	58.3317	8.60055	-0.000274023	-0.000181699	-0.000230483	-0.000228735	-0.87104	0.0111347	-0.116469	1.02307	0.918557	-0.298886	0.612778	20.4415	0.626765
PL5786	CLINO-1207.67-2AW	03/19/22	3.97736	0.00651431	0.00117	3.90018	0.0113754	0.00204309	21.5125	0.00651431	0.00117	20.997	0.0113754	0.00204309	42.998	0.0962847	0.0143533	44.1865	0.378931	0.0564877	169.003	42.5351	6.34076	-0.289263	0.0955039	0.017153	1.74028	0.338858	0.0608606	106.847	44.259	7.94916	-6.13151e-05	-0.000184024	-0.000121691	-0.000122343	-0.87104	0.010395	-0.111649	1.02139	0.916623	-0.284002	0.626546	16.0958	0.63427
PL5791	CLINO-1206.67-2AW	03/21/22	3.87197	0.00998471	0.000664173	3.74366	0.0187953	0.00125025	21.4068	0.00998471	0.000664173	20.8389	0.0187953	0.00125025	42.7049	0.165736	0.0110491	42.2895	0.446224	0.0297483	129.708	33.2368	2.21579	-0.312755	0.165367	0.0110001	0.170385	0.445232	0.0296164	60.6199	33.1629	2.20596	2.37682e-05	-0.000184954	-7.81744e-05	-7.97866e-05	-0.87104	0.0100991	-0.109721	1.0207	0.915844	-0.309347	0.600093	24.6236	0.606346
PL5835	CLINO-1207.67-2AW	03/31/22	3.99758	0.00770388	0.000883695	3.97534	0.0139154	0.0015962	21.5344	0.00770388	0.000883695	21.0728	0.0139154	0.0015962	43.0854	0.0891901	0.005946	43.5982	0.660461	0.0440307	274.395	63.0309	4.20206	-0.312803	0.0860353	0.00986893	0.896513	0.604613	0.0693539	186.72	57.7232	6.6213	0.000449185	-0.000189604	0.000139409	0.000132997	-0.87104	0.00861959	-0.100081	1.01709	0.911908	-0.318533	0.587932	28.8057	0.569509
PL5873	CLINO-1207.67-2AW	04/09/22	3.99527	0.0111604	0.000866219	3.94608	0.0190801	0.0014809	21.5311	0.0111604	0.000866219	21.0433	0.0190801	0.0014809	43.0636	0.0949273	0.00739008	42.9983	0.447279	0.0348206	241.167	44.9662	3.50061	-0.291147	0.0946392	0.00734543	0.450033	0.445921	0.0346102	164.653	44.8297	3.47946	0.00083206	-0.000193789	0.000335234	0.000324502	-0.87104	0.00728806	-0.091404	1.0136	0.908308	-0.305121	0.599037	24.98	0.584379
PL5939	CLINO-1207.67-2AW	04/25/22	3.9664	0.0249791	0.00203277	3.91771	0.0436732	0.00355408	21.5027	0.0249791	0.00203277	21.0146	0.0436732	0.00355408	43.0138	0.109994	0.008981	43.2312	0.542792	0.0443188	251.446	49.8485	4.07012	-0.282539	0.109627	0.00892133	0.729626	0.540979	0.0440243	174.398	49.6821	4.04307	0.000759179	0.000688764	0.000476599	0.000641514	-0.860728	0.00374973	-0.10373	1.03529	0.917128	-0.310133	0.596052	25.9941	0.570905
P5624_	CLINO-1211-2AW	02/12/22	4.21347	0.0237162	0.00184074	3.83921	0.0431676	0.00335046	21.7349	0.0237162	0.00184074	20.936	0.0431676	0.00335046	43.1299	0.0949135	0.007389	41.9561	0.388313	0.0302301	53.4884	16.2844	1.26774	-0.329976	0.0946254	0.00734436	-0.339671	0.387134	0.0300474	-11.4616	16.235	1.26008	0.000368418	-0.00171745	0.00022994	-0.000373032	-0.846118	-0.0305071	-0.111832	1.0852	0.943149	-0.313887	0.60252	23.8098	0.600343
P5638_	CLINO-1211-2AW	02/16/22	4.2483	0.0214497	0.00142681	3.9379	0.0391772	0.00260603	21.7714	0.0214497	0.00142681	21.0356	0.0391772	0.00260603	43.251	0.104891	0.00699271	42.0003	0.367339	0.0244892	42.6204	9.93244	0.662162	-0.346686	0.104657	0.0069617	-0.492221	0.366521	0.0243806	-21.8844	9.91034	0.659226	-0.00036694	-0.000466169	-0.000468268	-0.000433792	-0.852699	0.00384712	-0.114379	1.05088	0.923006	-0.327924	0.578397	32.2107	0.516521
P5639_	CL 1211 2AW	2022-02-19 23:53:00	4.20631	0.00818158	0.000857663	3.90419	0.0126934	0.00133063	21.7303	0.00818158	0.000857663	21.0015	0.0126934	0.00133063	43.1969	0.105546	0.0110642	41.5128	0.389081	0.0407868	31.5868	8.40667	0.881258	-0.324302	0.105546	0.0110642	-0.893146	0.389081	0.0407868	-32.1304	8.40667	0.881258	-0.000143671	0.000173999	0.00115649	0.000395606	-0.864988	-0.00290121	-0.122678	1.04452	0.93048	-0.341391	0.573892	34.2515	0.622953
PL5659	CLINO-1211-2AW	02/21/22	4.21159	0.0243099	0.00161707	3.85421	0.0451528	0.00300352	21.7336	0.0243099	0.00161707	20.9511	0.0451528	0.00300352	43.1638	0.110026	0.00733504	42.1075	0.434703	0.0289802	51.9947	14.3832	0.958878	-0.310787	0.109781	0.00730251	-0.223971	0.433736	0.0288517	-12.8907	14.3512	0.954626	0.000912214	-2.18318e-05	0.000682037	0.00052414	-0.846118	0.0103492	-0.112067	1.05306	0.9183	-0.333411	0.5672	36.3605	0.580809
PL5661	CLINO-1211-2AW	02/21/22	4.13066	0.0244825	0.00199236	3.70023	0.0458287	0.00372949	21.6513	0.0244825	0.00199236	20.7957	0.0458287	0.00372949	42.8919	0.0951458	0.00776862	41.7172	0.368148	0.0300592	48.7526	12.7575	1.04165	-0.338719	0.0948281	0.007717	-0.294116	0.366919	0.0298594	-15.5539	12.715	1.03473	-0.00036694	-0.000466169	-0.000468268	-0.000433792	-0.852699	0.00384712	-0.114379	1.05088	0.923006	-0.320113	0.586605	29.2726	0.58278
PL5836	CLINO-1211-2AW	04/01/22	4.19408	0.00864761	0.000575231	3.80911	0.0149493	0.000994412	21.7154	0.00864761	0.000575231	20.9056	0.0149493	0.000994412	43.1222	0.0940578	0.00627052	43.1016	0.594583	0.0396389	258.54	66.5387	4.43592	-0.288492	0.0938486	0.00624271	0.818904	0.59326	0.0394631	181.041	66.3907	4.41624	0.000491727	-0.000190069	0.000161167	0.000154275	-0.87104	0.00847165	-0.0991165	1.01671	0.91151	-0.295145	0.611433	20.8764	0.594047
PL6196	CLINO-1211-2AW	06/21/22	4.24495	0.0167788	0.00143877	3.86589	0.0259247	0.00222302	21.7657	0.0167788	0.00143877	20.963	0.0259247	0.00222302	43.1983	0.129746	0.0111668	42.5139	0.46136	0.0397075	1222.24	5724.82	492.714	-0.321525	0.129265	0.0110844	0.142673	0.459648	0.0394145	1085.06	5703.58	489.078	-0.00289808	0.00118127	0.00114988	-0.000188979	-0.877233	-0.0460849	-0.138986	1.07085	0.964783	-0.313362	0.629218	15.2743	0.571939
PL6234	CL1211 2AW	2022-07-08 17:25:00	4.21407	0.0135021	0.0014154	3.90324	0.0140084	0.00146848	21.7377	0.0135021	0.0014154	21.0005	0.0140084	0.00146848	43.2071	0.103576	0.0108577	42.1575	0.444	0.0465438	115.152	24.4829	2.56651	-0.321041	0.103576	0.0108577	-0.27284	0.444	0.0465438	46.267	24.4829	2.56651	0.000267077	0.000188084	0.0010703	0.000508486	-0.862979	-0.00370972	-0.124131	1.04845	0.931868	-0.343012	0.572237	34.8651	0.641439
PL7114	CLINO-12011-2AW	05/07/23	4.21211	0.00880037	0.000854768	3.83263	0.012229	0.00118778	21.7334	0.00880037	0.000854768	20.9294	0.012229	0.00118778	43.0666	0.0906325	0.00884483	41.5677	0.370077	0.0361158	35.5344	9.87346	0.963551	-0.382726	0.0901999	0.00876099	-0.699287	0.368311	0.0357735	-28.2948	9.82634	0.954418	-0.000846337	-0.000848688	-0.000857567	-0.000850864	-0.852008	-0.00519177	-0.140488	1.07195	0.942081	-0.346082	0.5711	34.8959	0.602613
PL7115	CLINO-12011-2AW	05/07/23	4.21637	0.00964616	0.000784993	3.84534	0.0131467	0.00106987	21.7378	0.00964616	0.000784993	20.9422	0.0131467	0.00106987	43.111	0.0862705	0.00704395	42.0436	0.563058	0.0459735	52.237	16.7339	1.36632	-0.357077	0.0859824	0.00699715	-0.26785	0.561178	0.045668	-12.6507	16.6781	1.35724	-0.000846337	-0.000848688	-0.000857567	-0.000850864	-0.852008	-0.00519177	-0.140488	1.07195	0.942081	-0.320395	0.598635	25.1158	0.628669
P5027	CLINO-1213.41-2AW	09/19/21	3.93597	0.00772613	0.000809918	3.1708	0.0128248	0.0013444	21.4477	0.00772613	0.000809918	20.2616	0.0128248	0.0013444	42.0688	0.122079	0.0128682	39.8117	0.416451	0.0438978	23.3001	10.19	1.07412	-0.408019	0.121399	0.012726	-1.07778	0.414131	0.0434127	-38.253	10.1332	1.06225	-0.00212248	-0.00199684	-0.00177165	-0.00196366	-0.87513	-0.0170323	-0.130884	1.04668	0.942525	-0.32541	0.601926	24.0081	0.585369
PL5794	CLINO-1213.41-2AW	03/21/22	4.1245	0.00969502	0.000720625	3.57919	0.014977	0.00111323	21.6412	0.00969502	0.000720625	20.6737	0.014977	0.00111323	42.8004	0.0978886	0.00729618	41.9186	0.371924	0.0277216	140.085	35.4761	2.64423	-0.298707	0.0976163	0.00725576	0.138217	0.37089	0.027568	70.441	35.3774	2.62958	2.37682e-05	-0.000184954	-7.81744e-05	-7.97866e-05	-0.87104	0.0100991	-0.109721	1.0207	0.915844	-0.295292	0.614439	19.9068	0.600084
PL5820	CLINO-1213.41-2AW	03/28/22	4.02756	0.0162842	0.00108321	3.52182	0.013157	0.000875193	21.547	0.0162842	0.00108321	20.6157	0.013157	0.000875193	42.644	0.0911036	0.00607358	42.0717	0.429537	0.0286358	191.394	44.6426	2.97618	-0.297709	0.090901	0.00604664	0.398987	0.428581	0.0285088	118.85	44.5433	2.96298	0.00032156	-0.000188209	7.41338e-05	6.91617e-05	-0.87104	0.00906344	-0.102973	1.0182	0.913096	-0.300659	0.606965	22.3358	0.594445
PL5822	CLINO-1213.41-2AW	03/28/22	4.09103	0.00791003	0.000719094	3.43102	0.0145673	0.0013243	21.6042	0.00791003	0.000719094	20.5243	0.0145673	0.0013243	42.62	0.0953873	0.00870763	42.1476	0.481508	0.0439555	237.781	55.5745	5.07323	-0.29039	0.094989	0.00863537	0.651072	0.479498	0.0435907	162.548	55.3424	5.03113	0.00032156	-0.000188209	7.41338e-05	6.91617e-05	-0.87104	0.00906344	-0.102973	1.0182	0.913096	-0.293338	0.614419	19.9131	0.602138
PL5844	CLINO-1213.41-2AW	04/02/22	4.00842	0.00941952	0.00076655	3.46101	0.0161962	0.00131803	21.5267	0.00941952	0.00076655	20.5543	0.0161962	0.00131803	42.5717	0.0950564	0.00776132	41.9582	0.460509	0.0376004	241.85	48.595	3.96777	-0.287416	0.094739	0.00770975	0.410217	0.458971	0.0373506	166.397	48.4328	3.9414	0.000534268	-0.000190534	0.000182925	0.000175553	-0.87104	0.0083237	-0.0981524	1.01633	0.911112	-0.29489	0.611407	20.8849	0.594315
PL7116	CLINO-12013.41-2AW	05/08/23	4.12663	0.0084842	0.000606014	3.65193	0.0124116	0.000886544	21.6458	0.0084842	0.000606014	20.747	0.0124116	0.000886544	42.8372	0.0857143	0.00613813	41.3159	0.462136	0.0330942	37.0677	10.5909	0.758432	-0.338688	0.0854943	0.00610673	-0.583941	0.460949	0.0329249	-26.4255	10.5637	0.754553	-0.00085061	-0.000844362	-0.000857567	-0.000850847	-0.852644	-0.00534274	-0.140488	1.07123	0.942123	-0.30224	0.618355	18.6575	0.647084
PL5704	CL1213.41 2AW	03/03/20	3.9808	0.00864735	0.000906488	3.44114	0.0229367	0.00240442	13.6133	0.00864735	0.000906488	18.6638	0.0229367	0.00240442	32.3612	0.124987	0.0131022	42.1977	1.43827	0.150771	134.293	11.4829	1.20373	-0.281613	0.124987	0.0131022	4.35776	1.43827	0.150771	78.166	11.4829	1.20373	-0.00067024	-0.000752861	-0.000355609	-0.000592903	-0.885536	-0.0275331	-0.13532	1.04368	0.95032	-0.262426	0.676431	2.17818	0.661
P4989	CLINO-1215-3AW	09/11/21	4.29608	0.00847967	0.000888911	3.96873	0.0121501	0.00127368	21.818	0.00847967	0.000888911	21.0667	0.0121501	0.00127368	43.3028	0.123174	0.0129837	41.4778	0.468917	0.0494281	20.1629	6.03503	0.636148	-0.373997	0.122488	0.0128403	-1.05442	0.466304	0.048882	-43.0563	6.00141	0.629118	-0.00212248	-0.00199684	-0.00177165	-0.00196366	-0.87513	-0.0170323	-0.130884	1.04668	0.942525	-0.288965	0.640073	12.0088	0.638383
PL5668	CLINO-1215-3AW	02/23/22	4.42293	0.0255578	0.00170008	4.27662	0.0485302	0.00322818	21.9493	0.0255578	0.00170008	21.3774	0.0485302	0.00322818	43.8104	0.0966031	0.00644021	42.9073	0.397768	0.0265179	51.6051	12.6961	0.846406	-0.31932	0.0963882	0.00641165	-0.291645	0.396883	0.0264003	-14.2871	12.6678	0.842652	-0.00036694	-0.000466169	-0.000468268	-0.000433792	-0.852699	0.00384712	-0.114379	1.05088	0.923006	-0.300315	0.60741	22.1895	0.604649
PL5673	CLINO-1215-3AW	02/24/22	4.4047	0.0344084	0.00228882	4.32094	0.0617857	0.00410992	21.9335	0.0344084	0.00228882	21.422	0.0617857	0.00410992	43.827	0.121266	0.00808441	43.2566	0.504498	0.0336332	61.8386	19.6398	1.30932	-0.330486	0.120996	0.00804856	-0.0441952	0.503376	0.0334841	-4.76388	19.5961	1.30351	-0.00036694	-0.000466169	-0.000468268	-0.000433792	-0.852699	0.00384712	-0.114379	1.05088	0.923006	-0.311474	0.595684	26.1197	0.587985
P5625_	CLINO-1215-3AW	02/12/22	4.3944	0.0177384	0.00144353	4.25311	0.0302214	0.00245939	21.9214	0.0177384	0.00144353	21.3536	0.0302214	0.00245939	43.7722	0.100952	0.00824273	42.8928	0.402745	0.032884	52.5256	12.3017	1.00443	-0.304823	0.100615	0.00818796	-0.259038	0.401401	0.0326655	-13.3504	12.2607	0.997759	0.000368418	-0.00171745	0.00022994	-0.000373032	-0.846118	-0.0305071	-0.111832	1.0852	0.943149	-0.288495	0.630076	15.0123	0.626684
P5629_	CLINO-1215-3AW	02/14/22	4.48371	0.0244542	0.00162667	4.52083	0.0428651	0.00285135	22.0156	0.0244542	0.00162667	21.6237	0.0428651	0.00285135	44.1329	0.109712	0.00731416	43.2649	0.366884	0.0244589	44.3087	10.4622	0.697481	-0.314406	0.109468	0.00728172	-0.430956	0.366068	0.0243505	-21.6576	10.4389	0.694388	0.000489262	-0.00174393	0.000330406	-0.000308088	-0.846118	-0.0313889	-0.111884	1.0859	0.94372	-0.300809	0.61707	19.0657	0.613909
PL5845	CLINO-1215-3AW	04/03/22	4.4197	0.0139793	0.000929892	4.34769	0.0187754	0.00124892	21.9487	0.0139793	0.000929892	21.449	0.0187754	0.00124892	43.9292	0.107601	0.00717339	44.3411	0.630562	0.0420374	289.732	65.4942	4.36628	-0.273896	0.107361	0.00714158	0.942423	0.629159	0.041851	208.753	65.3485	4.34692	0.00057681	-0.000190999	0.000204684	0.000196832	-0.87104	0.00817575	-0.0971883	1.01595	0.910714	-0.282542	0.623665	16.989	0.60727
PL7118	CLINO-1215-2AW	05/08/23	4.43656	0.00755063	0.000866117	4.42463	0.0102911	0.00118047	21.9674	0.00755063	0.000866117	21.5266	0.0102911	0.00118047	43.9531	0.0865408	0.00999287	43.3414	0.586588	0.0677333	49.8994	14.8618	1.71609	-0.344503	0.0859619	0.00986051	-0.167667	0.582664	0.0668362	-16.187	14.7624	1.69336	-0.000854883	-0.000840036	-0.000857567	-0.000850829	-0.85328	-0.00549371	-0.140488	1.07051	0.942164	-0.307106	0.613405	20.2392	0.642148
PL7119	CLINO-1215-2AW	05/08/23	4.44091	0.00828185	0.000804404	4.42957	0.011698	0.00113621	21.9718	0.00828185	0.000804404	21.5316	0.011698	0.00113621	43.9681	0.0926303	0.00903979	43.5924	0.654552	0.0638778	54.3055	17.3109	1.68937	-0.339294	0.0921881	0.0089541	0.0631001	0.651428	0.0632723	-12.0722	17.2282	1.67335	-0.000854883	-0.000840036	-0.000857567	-0.000850829	-0.85328	-0.00549371	-0.140488	1.07051	0.942164	-0.301884	0.618995	18.4549	0.647445
PL5795	CLINO-1226.67-2AW	03/22/22	4.01882	0.0103752	0.00069015	3.27474	0.0176308	0.00117278	21.5301	0.0103752	0.00069015	20.3666	0.0176308	0.00117278	42.3873	0.089547	0.0059698	42.182	0.60986	0.0406573	207.403	50.9486	3.39657	-0.286848	0.0893477	0.00594332	0.993425	0.608503	0.040477	134.449	50.8352	3.38151	6.63099e-05	-0.000185419	-5.6416e-05	-5.85083e-05	-0.87104	0.00995113	-0.108757	1.02035	0.915453	-0.284368	0.625298	16.4816	0.611564
PL5798	CLINO-1226.67-2AW	03/22/22	4.00709	0.00815613	0.00104429	3.29161	0.01605	0.00205499	21.5195	0.00815613	0.00104429	20.3836	0.01605	0.00205499	42.404	0.0780642	0.010078	41.651	0.499335	0.0644639	178.428	31.2209	4.0306	-0.27655	0.0774109	0.00991145	0.450043	0.495157	0.0633983	107.2	30.9596	3.96397	6.63099e-05	-0.000185419	-5.6416e-05	-5.85083e-05	-0.87104	0.00995113	-0.108757	1.02035	0.915453	-0.274069	0.635807	13.279	0.622387
PL5819	CLINO-1226.67-2AW	03/27/22	4.05289	0.00804939	0.00065505	3.3935	0.0114884	0.000934909	21.5666	0.00804939	0.00065505	20.4864	0.0114884	0.000934909	42.5359	0.0929801	0.00759179	41.844	0.448177	0.0365935	227.957	50.0723	4.08839	-0.296652	0.0926697	0.00754135	0.433869	0.44668	0.0363503	153.45	49.9052	4.06122	0.000279018	-0.000187744	5.23755e-05	4.78833e-05	-0.87104	0.00921139	-0.103937	1.01856	0.91349	-0.298689	0.609257	21.5847	0.596515
PL5821	CLINO-1226.67-2AW	03/28/22	3.99369	0.00959625	0.000744813	3.26901	0.0136588	0.00106013	21.506	0.00959625	0.000744813	20.3607	0.0136588	0.00106013	42.3538	0.0897786	0.00698925	42.4994	0.894838	0.0696631	328.058	100.51	7.82467	-0.28901	0.0895061	0.00694702	1.30973	0.892122	0.0692421	247.859	100.205	7.77739	0.00032156	-0.000188209	7.41338e-05	6.91617e-05	-0.87104	0.00906344	-0.102973	1.0182	0.913096	-0.291939	0.615844	19.4567	0.603608
PL5824	CLINO-1226.67-2AW	03/29/22	4.03764	0.0203289	0.00135226	3.47516	0.0130487	0.000867986	21.555	0.0203289	0.00135226	20.5686	0.0130487	0.000867986	42.6179	0.120734	0.00804896	43.3794	1.15319	0.0768792	354.594	120.691	8.04609	-0.285458	0.120466	0.00801327	1.74665	1.15062	0.0765382	272.218	120.423	8.01041	0.000364102	-0.000188674	9.58921e-05	9.044e-05	-0.87104	0.00891549	-0.102009	1.01783	0.9127	-0.289313	0.618229	18.6975	0.606368
PL5846	CLINO-1226.67-2AW	04/03/22	4.04321	0.0105491	0.00078411	3.38062	0.0174348	0.00129592	21.557	0.0105491	0.00078411	20.4734	0.0174348	0.00129592	42.5224	0.0914678	0.00681761	42.2917	0.620216	0.0462282	308.78	76.5873	5.70848	-0.287272	0.0912134	0.00677984	0.889282	0.618491	0.0459721	229.413	76.3743	5.67686	0.00057681	-0.000190999	0.000204684	0.000196832	-0.87104	0.00817575	-0.0971883	1.01595	0.910714	-0.295642	0.610357	21.2261	0.593526
PL5847	CLINO-1226.67-2AW	04/03/22	3.98407	0.010603	0.000909201	3.36509	0.0174709	0.00149812	21.5002	0.010603	0.000909201	20.4576	0.0174709	0.00149812	42.4416	0.0913843	0.00786511	41.8899	0.478825	0.0412107	213.769	40.5338	3.4886	-0.292289	0.0910452	0.00780706	0.534379	0.477049	0.0409066	140.266	40.3834	3.46285	0.00057681	-0.000190999	0.000204684	0.000196832	-0.87104	0.00817575	-0.0971883	1.01595	0.910714	-0.300642	0.605276	22.8932	0.588279
P5017	CLINO-1231.85-2AW	09/17/21	3.99416	0.00750572	0.000786813	3.25711	0.0135673	0.00142224	21.506	0.00750572	0.000786813	20.3487	0.0135673	0.00142224	42.2246	0.127194	0.0134074	39.6888	0.4737	0.0499324	9.73383	7.79724	0.821901	-0.401461	0.126485	0.0132592	-1.36637	0.471061	0.0493806	-51.2203	7.7538	0.812819	-0.00212248	-0.00199684	-0.00177165	-0.00196366	-0.87513	-0.0170323	-0.130884	1.04668	0.942525	-0.318546	0.60911	21.6325	0.592547
PL5796	CLINO-1231.85-2AW	03/22/22	4.13227	0.00991076	0.00103893	3.49709	0.0162357	0.00170196	21.6457	0.00991076	0.00103893	20.591	0.0162357	0.00170196	42.7121	0.105897	0.0111625	42.1172	0.477426	0.0503252	179.557	36.8056	3.87966	-0.308309	0.105307	0.0110391	0.491111	0.474767	0.0497691	107.673	36.6006	3.83678	6.63099e-05	-0.000185419	-5.6416e-05	-5.85083e-05	-0.87104	0.00995113	-0.108757	1.02035	0.915453	-0.30581	0.603419	23.5096	0.589031
PL5800	CLINO-1231.85-2AW	03/23/22	4.13624	0.0097188	0.000790904	3.46436	0.0159961	0.00130174	21.6484	0.0097188	0.000790904	20.558	0.0159961	0.00130174	42.6986	0.0895124	0.00730865	42.3921	0.618586	0.0505074	247.69	58.7654	4.79817	-0.292133	0.0892135	0.00726009	0.819647	0.616521	0.0501718	171.725	58.5691	4.76629	0.000108852	-0.000185884	-3.46577e-05	-3.723e-05	-0.87104	0.00980318	-0.107793	1.02	0.915062	-0.290543	0.618708	18.5456	0.605075
PL5817	CLINO-1231.85-2AW	03/27/22	4.15004	0.00720882	0.000559513	3.43984	0.0111613	0.000866288	21.6606	0.00720882	0.000559513	20.5333	0.0111613	0.000866288	42.6698	0.0927964	0.00722419	41.774	0.411344	0.0320231	188.936	40.1336	3.1244	-0.30829	0.0925148	0.00718054	0.274613	0.410096	0.0318296	116.587	40.0118	3.10552	0.000279018	-0.000187744	5.23755e-05	4.78833e-05	-0.87104	0.00921139	-0.103937	1.01856	0.91349	-0.310333	0.597396	25.5359	0.584278
PL5823	CLINO-1231.85-2AW	03/28/22	4.05584	0.00840843	0.000624993	3.43288	0.0129129	0.000959806	21.5708	0.00840843	0.000624993	20.5261	0.0129129	0.000959806	42.595	0.0933291	0.00695634	42.6617	0.783839	0.0584239	287.188	78.6221	5.86015	-0.282401	0.0930695	0.0069178	1.14116	0.781658	0.0581002	208.99	78.4034	5.82768	0.00032156	-0.000188209	7.41338e-05	6.91617e-05	-0.87104	0.00906344	-0.102973	1.0182	0.913096	-0.285347	0.622555	17.3354	0.610535
PL5848	CLINO-1231.85-2AW	04/03/22	4.15829	0.0103767	0.000844442	3.53564	0.0165449	0.0013464	21.6718	0.0103767	0.000844442	20.6299	0.0165449	0.0013464	42.8107	0.102349	0.00835676	42.2624	0.483475	0.0394755	233.523	48.9083	3.99334	-0.277542	0.102007	0.00830124	0.554214	0.48186	0.0392132	158.232	48.745	3.96681	0.00057681	-0.000190999	0.000204684	0.000196832	-0.87104	0.00817575	-0.0971883	1.01595	0.910714	-0.285968	0.620185	18.0795	0.603675
PL5940	CLINO-1231.85-2AW	04/25/22	4.14255	0.029929	0.00243559	3.43921	0.0543878	0.00442602	21.6535	0.029929	0.00243559	20.5326	0.0543878	0.00442602	42.6844	0.116553	0.00951655	42.0439	0.507066	0.0414018	207.558	50.8165	4.14915	-0.286449	0.116164	0.00945332	0.535016	0.505373	0.0411267	134.086	50.6468	4.12158	0.000759179	0.000688764	0.000476599	0.000641514	-0.860728	0.00374973	-0.10373	1.03529	0.917128	-0.313832	0.592223	27.3101	0.5671
PL5697	CLINO-1243.08-2AW	03/01/22	4.55072	0.0265613	0.00206156	4.18285	0.0498193	0.00386673	22.0675	0.0265613	0.00206156	21.2831	0.0498193	0.00386673	43.8268	0.111136	0.0086519	42.5713	0.349351	0.027197	44.1053	10.8397	0.843866	-0.332182	0.110798	0.00859963	-0.429266	0.348291	0.0270326	-21.2601	10.8068	0.838767	-0.00036694	-0.000466169	-0.000468268	-0.000433792	-0.852699	0.00384712	-0.114379	1.05088	0.923006	-0.31317	0.593902	26.7309	0.586168
PL5709	CLINO-1243.08-2AW	03/04/22	4.38604	0.0236509	0.00157324	4.21267	0.0440469	0.00292995	21.912	0.0236509	0.00157324	21.3128	0.0440469	0.00292995	43.7179	0.10865	0.00724336	42.708	0.336626	0.0224417	42.2096	10.671	0.711399	-0.308187	0.108409	0.00721123	-0.356302	0.335877	0.0223422	-22.9345	10.6472	0.708244	-0.00036694	-0.000466169	-0.000468268	-0.000433792	-0.852699	0.00384712	-0.114379	1.05088	0.923006	-0.289222	0.619068	18.432	0.611349
PL5726	CLINO-1243.08-2AW	03/07/22	4.45855	0.02663	0.00190214	3.86537	0.0501396	0.0035814	21.9688	0.02663	0.00190214	20.9629	0.0501396	0.0035814	43.4055	0.110312	0.00789964	42.1543	0.428005	0.03065	53.4747	16.8246	1.20483	-0.327943	0.110029	0.00785923	-0.20221	0.426906	0.0304933	-11.7668	16.7814	1.19867	-0.00036694	-0.000466169	-0.000468268	-0.000433792	-0.852699	0.00384712	-0.114379	1.05088	0.923006	-0.309114	0.598163	25.2756	0.590368
PL5727	CLINO-1243.08-2AW	03/08/22	4.40871	0.0277049	0.0018429	3.94761	0.0509645	0.00339011	21.9243	0.0277049	0.0018429	21.0457	0.0509645	0.00339011	43.4389	0.109126	0.00727509	42.2275	0.466721	0.0311147	48.8648	14.9048	0.993653	-0.330731	0.108884	0.00724282	-0.294095	0.465682	0.0309767	-16.2023	14.8716	0.989247	-0.00036694	-0.000466169	-0.000468268	-0.000433792	-0.852699	0.00384712	-0.114379	1.05088	0.923006	-0.311888	0.595249	26.2684	0.590869
PL5849	CLINO-1243.08-2AW	04/04/22	4.54939	0.0116739	0.000776539	4.23559	0.0214121	0.00142431	22.0681	0.0116739	0.000776539	21.3363	0.0214121	0.00142431	43.9323	0.0931073	0.00620715	43.5936	0.430761	0.0287174	193.699	43.1218	2.87479	-0.282888	0.0929001	0.00617962	0.446778	0.429803	0.02859	118.853	43.0259	2.86204	0.000619352	-0.000191464	0.000226442	0.00021811	-0.87104	0.0080278	-0.0962243	1.01556	0.910314	-0.29247	0.613293	20.2754	0.596854
PL6197	CLINO-1243.08-2AW	06/22/22	4.55074	0.013962	0.00135611	4.13839	0.0223443	0.00217027	22.066	0.013962	0.00135611	21.2383	0.0223443	0.00217027	43.8215	0.141405	0.0137997	42.9663	0.43981	0.0429211	432.069	2580.48	251.829	-0.292643	0.14073	0.0136689	0.0372468	0.437711	0.0425143	342.534	2568.16	249.442	-0.000388754	-0.000230359	9.47915e-05	-0.000174774	-0.860283	-0.00273424	-0.109944	1.04396	0.92417	-0.284984	0.626658	16.0611	0.609367
PL6271	CLINO-1243.08-2AW	07/10/22	4.52567	0.273871	0.0266007	4.09129	0.650748	0.0632063	22.0405	0.273871	0.0266007	21.1908	0.650748	0.0632063	43.752	1.12027	0.109327	42.599	1.66109	0.162106	51.8347	17.6518	1.72264	-0.287693	1.11492	0.108291	-0.221939	1.65316	0.160569	-13.8116	17.5675	1.70631	-0.00054765	0.00146865	-0.00496629	-0.00134843	-0.830934	-0.0269774	0.0212145	1.00367	0.865515	-0.228696	0.63598	13.2272	0.654388
P5024	CLINO-1243.67-2AW	09/18/21	5.24276	0.00842878	0.000883576	5.4531	0.0134962	0.00141478	22.7699	0.00842878	0.000883576	22.5651	0.0134962	0.00141478	45.752	0.129842	0.0136865	43.9295	0.471752	0.049727	15.8703	7.21754	0.760796	-0.431504	0.129118	0.0135353	-1.63497	0.469123	0.0491775	-50.7672	7.17734	0.752389	-0.00212248	-0.00199684	-0.00177165	-0.00196366	-0.87513	-0.0170323	-0.130884	1.04668	0.942525	-0.341663	0.584914	29.871	0.56837
PL5967	CLINO-1783.25-2AW	05/02/22	3.15261	0.0263116	0.0021412	4.38238	0.0481533	0.00391866	20.7452	0.0263116	0.0021412	21.4813	0.0481533	0.00391866	42.6977	0.106092	0.0086624	43.9967	0.470308	0.0384005	207.187	40.9867	3.34655	-0.269622	0.105738	0.00860484	0.549061	0.468738	0.0381453	132.742	40.8499	3.32432	0.00105697	0.000685509	0.000628907	0.000790463	-0.860728	0.00271409	-0.0969815	1.03251	0.914273	-0.303372	0.601038	24.3059	0.576847
PL5981	CLINO-1783.25-2AW	05/05/22	3.15668	0.0344439	0.0036107	4.45719	0.0630196	0.00660625	20.7517	0.0344439	0.0036107	21.5567	0.0630196	0.00660625	42.7705	0.123985	0.0130692	44.4476	0.520857	0.0549031	185.935	45.7517	4.82266	-0.278914	0.123294	0.0129247	0.833374	0.517955	0.0542965	112.632	45.4969	4.76937	0.0011846	0.000684114	0.000694182	0.000854298	-0.860728	0.00227024	-0.0940893	1.03128	0.913039	-0.315452	0.58772	28.8801	0.592854
PL5992	CLINO-1783.25-2AW	05/09/22	3.1619	0.0416113	0.00276794	4.4637	0.0775059	0.00515562	20.7568	0.0416113	0.00276794	21.5633	0.0775059	0.00515562	42.8112	0.14889	0.00992598	45.1517	1.01484	0.0676557	265.618	105.082	7.00547	-0.25146	0.148559	0.00988197	1.49527	1.01258	0.0673557	187.368	104.848	6.9744	0.00135476	0.000682254	0.000781216	0.000939411	-0.860728	0.00167845	-0.0902331	1.0296	0.911385	-0.291677	0.611075	20.9925	0.618326
PL6003	CLINO-1783.25-2AW	05/11/22	3.19734	0.0240352	0.00178652	4.49317	0.0441945	0.00328495	20.7916	0.0240352	0.00178652	21.593	0.0441945	0.00328495	42.8644	0.106368	0.00792819	44.6028	0.658294	0.0490663	229.1	74.8719	5.58062	-0.264191	0.106072	0.00788426	0.910915	0.656463	0.0487945	153	74.6636	5.5497	0.00143985	0.000681324	0.000824732	0.000981967	-0.860728	0.00138255	-0.088305	1.02874	0.910555	-0.306283	0.595469	26.1932	0.607988
PL6716	CLINO-1783.25-2AW	11/11/22	3.27397	0.0380999	0.00346363	4.74406	0.085452	0.00776837	20.8732	0.0380999	0.00346363	21.8461	0.085452	0.00776837	43.187	0.174341	0.0159151	43.79	0.501729	0.0458013	60.9983	14.457	1.31974	-0.280939	0.173614	0.0157831	-0.363259	0.499634	0.0454212	-5.26248	14.3967	1.30879	8.89835e-05	-0.000177733	0.00011616	9.13686e-06	-0.841425	0.0260324	-0.103424	1.04229	0.904817	-0.281334	0.611586	20.827	0.629542
PL7120	CLINO-1783.25-2AW	05/09/23	3.25158	0.00650818	0.000448041	4.79006	0.01152	0.000793068	20.8535	0.00650818	0.000448041	21.8924	0.01152	0.000793068	43.1615	0.089459	0.00617326	44.0828	0.734816	0.0507072	50.501	19.2213	1.3264	-0.32997	0.0892457	0.00614393	-0.173448	0.733065	0.0504663	-15.1717	19.1755	1.3201	-0.000859155	-0.00083571	-0.000857567	-0.000850811	-0.853916	-0.00564467	-0.140488	1.06979	0.942206	-0.293248	0.628493	15.4966	0.656205
PL7149	CLINO-1783.25-2AW	05/14/23	3.30193	0.00888398	0.000722968	4.84873	0.0137268	0.00111707	20.9034	0.00888398	0.000722968	21.9517	0.0137268	0.00111707	43.2797	0.0928516	0.0075813	43.3407	0.295652	0.0241399	24.4949	4.78407	0.390617	-0.324122	0.0925416	0.00753092	-0.99995	0.294665	0.0239795	-39.7114	4.76809	0.388022	-0.000910427	-0.000606489	-0.000857567	-0.000791495	-0.861549	-0.00745628	-0.140488	1.06123	0.942694	-0.289866	0.635079	13.4973	0.659635
PL5955	CLINO-1796.8-2AW	04/29/22	3.09806	0.0177325	0.00137631	4.51027	0.0316236	0.00245447	20.6978	0.0177325	0.00137631	21.6101	0.0316236	0.00245447	42.7555	0.360645	0.0280762	44.0059	0.713178	0.0555208	147.457	29.4542	2.293	-0.290208	0.359551	0.0279065	0.30558	0.711013	0.0551853	76.4824	29.3648	2.27915	-0.000194183	0.000559266	0.000107089	0.000157391	-0.857932	0.0122723	-0.118609	1.03947	0.919701	-0.296937	0.611045	21.0025	0.610343
PL5976	CLINO-1796.8-2AW	05/04/22	3.24356	0.0192497	0.00149407	4.72337	0.0373153	0.00289623	20.8436	0.0192497	0.00149407	21.8252	0.0373153	0.00289623	43.1327	0.112042	0.00872248	44.2542	0.362765	0.0282412	120.141	31.2702	2.43438	-0.282925	0.111702	0.00866978	0.122298	0.361664	0.0280706	50.2612	31.1753	2.41967	-0.000194183	0.000559266	0.000107089	0.000157391	-0.857932	0.0122723	-0.118609	1.03947	0.919701	-0.289714	0.618553	18.5948	0.584143
PL5986	CLINO-1796.8-2AW	05/07/22	3.20734	0.0249459	0.00203007	4.51956	0.0465918	0.00379159	20.802	0.0249459	0.00203007	21.6197	0.0465918	0.00379159	42.8939	0.11314	0.00923783	44.2069	0.43299	0.0353534	192.61	37.6437	3.0736	-0.272092	0.112762	0.00917644	0.479379	0.431544	0.0351185	118.7	37.518	3.05317	0.00126968	0.000683184	0.000737699	0.000896854	-0.860728	0.00197435	-0.0921612	1.03044	0.912214	-0.310562	0.592197	27.3188	0.598094
PL5998	CLINO-1796.8-2AW	05/10/22	3.11157	0.0295566	0.00211119	4.59347	0.0549434	0.00392453	20.7135	0.0295566	0.00211119	21.694	0.0549434	0.00392453	42.8799	0.108622	0.00777857	44.7757	0.638292	0.045709	212.764	71.5432	5.12332	-0.267538	0.108343	0.00773879	0.878775	0.636653	0.0454752	137.547	71.3595	5.09711	0.0013973	0.000681789	0.000802974	0.000960689	-0.860728	0.0015305	-0.089269	1.02917	0.91097	-0.308732	0.593232	26.9615	0.605377
PL6719	CLINO-1796.8-2AW	11/12/22	3.30036	0.0657326	0.00488587	4.87109	0.116863	0.00868637	20.9027	0.0657326	0.00488587	21.9742	0.116863	0.00868637	43.331	0.217844	0.0162371	44.2083	0.543598	0.0405174	64.2531	15.799	1.17758	-0.295997	0.217238	0.0161472	-0.21335	0.542086	0.0402929	-2.48744	15.755	1.17106	8.89835e-05	-0.000177733	0.00011616	9.13686e-06	-0.841425	0.0260324	-0.103424	1.04229	0.904817	-0.296393	0.59589	26.0494	0.614492
PL6720	CLINO-1796.8-2AW	11/12/22	3.30501	0.0457488	0.00524775	4.87844	0.0852042	0.0097736	20.9074	0.0457488	0.00524775	21.9816	0.0852042	0.0097736	43.32	0.171567	0.0167432	44.1659	0.386828	0.0377506	64.0511	15.2272	1.48602	-0.314044	0.170774	0.0195892	-0.274664	0.402821	0.0462067	-2.77568	15.7492	1.80656	8.89835e-05	-0.000177733	0.00011616	9.13686e-06	-0.841425	0.0260324	-0.103424	1.04229	0.904817	-0.314439	0.57708	32.6902	0.596456
PL7148	CLINO-1796.8-2AW	05/14/23	3.31019	0.00927931	0.00118809	4.946	0.0120865	0.00154751	20.9147	0.00927931	0.00118809	22.0498	0.0120865	0.00154751	43.3613	0.0855943	0.0110502	43.3993	0.311146	0.0401688	19.7317	6.22479	0.803617	-0.351647	0.084878	0.0108675	-1.13555	0.308542	0.0395048	-44.3676	6.1727	0.790333	-0.000910427	-0.000606489	-0.000857567	-0.000791495	-0.861549	-0.00745628	-0.140488	1.06123	0.942694	-0.317326	0.605938	22.6746	0.631782
PL5968	CLINO-1872-2AW	05/02/22	3.49028	0.0319979	0.00237838	4.59372	0.0613551	0.00456049	21.0736	0.0319979	0.00237838	21.695	0.0613551	0.00456049	43.2521	0.116544	0.0086867	44.4514	0.487066	0.0363038	198.778	47.0986	3.51052	-0.275633	0.11622	0.00863858	0.566026	0.485711	0.0361026	124.004	46.9676	3.49107	-0.000194183	0.000559266	0.000107089	0.000157391	-0.857932	0.0122723	-0.118609	1.03947	0.919701	-0.28244	0.626114	16.2292	0.625788
PL5984	CLINO-1872-2AW	05/06/22	3.41182	0.0278648	0.00185354	4.31383	0.0532113	0.00353956	20.9892	0.0278648	0.00185354	21.4127	0.0532113	0.00353956	42.8761	0.108498	0.00723323	43.9624	0.582548	0.0388365	187.665	54.8153	3.65435	-0.279153	0.108257	0.00720115	0.650469	0.581252	0.0386643	114.288	54.6933	3.63814	-0.000194183	0.000559266	0.000107089	0.000157391	-0.857932	0.0122723	-0.118609	1.03947	0.919701	-0.285901	0.622516	17.3477	0.587778
PL5996	Clino-1872-2AW	05/10/22	3.47533	0.0194314	0.00129256	4.57287	0.0353364	0.00235055	21.0587	0.0194314	0.00129256	21.674	0.0353364	0.00235055	43.2179	0.101479	0.00676524	44.4106	0.500048	0.0333365	165.027	45.5304	3.03536	-0.273104	0.101253	0.00673524	0.568167	0.498935	0.0331887	92.42	45.4291	3.0219	-0.000194183	0.000559266	0.000107089	0.000157391	-0.857932	0.0122723	-0.118609	1.03947	0.919701	-0.279907	0.628747	15.4186	0.575032
PL6007	CLINO-1872-2AW	05/12/22	3.43321	0.0240042	0.00205834	4.29471	0.0473438	0.0040597	21.0089	0.0240042	0.00205834	21.3935	0.0473438	0.0040597	42.8888	0.108711	0.00935632	43.6198	0.48454	0.0417026	136.754	35.8855	3.08853	-0.268387	0.108307	0.00928726	0.359753	0.482742	0.0413948	66.5395	35.7523	3.06573	-0.000194183	0.000559266	0.000107089	0.000157391	-0.857932	0.0122723	-0.118609	1.03947	0.919701	-0.275138	0.633705	13.9111	0.57892
PL6707	CLINO-1872-2AW	11/09/22	3.50587	0.0186766	0.00195783	4.62713	0.0447913	0.0046954	21.0896	0.0186766	0.00195783	21.7287	0.0447913	0.0046954	43.2898	0.10453	0.0110184	43.6402	0.381458	0.0402092	65.5217	14.0153	1.47735	-0.288097	0.103947	0.0108966	-0.277079	0.379333	0.0397649	-1.02168	13.9373	1.46102	8.89835e-05	-0.000177733	0.00011616	9.13686e-06	-0.841425	0.0260324	-0.103424	1.04229	0.904817	-0.288493	0.604124	23.2753	0.622387
PL6708	CLINO-1872-2AW	11/09/22	3.5243	0.0276802	0.00251638	4.67275	0.0583769	0.00530699	21.1087	0.0276802	0.00251638	21.7748	0.0583769	0.00530699	43.3706	0.130304	0.0118951	44.0192	0.511759	0.046717	74.4341	19.3359	1.76512	-0.274319	0.12976	0.0117963	-0.00408199	0.509622	0.0463293	7.22483	19.2552	1.75047	8.89835e-05	-0.000177733	0.00011616	9.13686e-06	-0.841425	0.0260324	-0.103424	1.04229	0.904817	-0.274716	0.618484	18.6169	0.636155
PL7146	CLINO-1872-2AW	05/14/23	3.42049	0.00856708	0.000636786	4.71836	0.0119347	0.000887098	21.0116	0.00856708	0.000636786	21.8205	0.0119347	0.000887098	43.2371	0.0864681	0.00644495	42.7512	0.331689	0.0247226	16.8243	4.54532	0.338788	-0.348093	0.0862275	0.00640924	-1.30803	0.330766	0.0245857	-46.7685	4.53267	0.336911	-0.000906154	-0.000610813	-0.000857567	-0.000791512	-0.860913	-0.00730531	-0.140488	1.06194	0.942654	-0.31387	0.609343	21.5564	0.635288
PL7147	CLINO-1872-2AW	05/14/23	3.42053	0.0070213	0.000898985	4.71444	0.0109997	0.00140836	21.0115	0.0070213	0.000898985	21.8166	0.0109997	0.00140836	43.2089	0.0863965	0.0111537	42.8208	0.339308	0.0438044	24.0448	4.47601	0.57785	-0.371232	0.0856735	0.0109694	-1.23369	0.336468	0.0430803	-39.9922	4.43855	0.568298	-0.000906154	-0.000610813	-0.000857567	-0.000791512	-0.860913	-0.00730531	-0.140488	1.06194	0.942654	-0.337032	0.584746	29.9306	0.611793
PL5957	CLINO-1885.42-2AW	04/30/22	3.2764	0.046512	0.00309393	4.34175	0.084468	0.00561873	20.8614	0.046512	0.00309393	21.4406	0.084468	0.00561873	42.786	0.162242	0.0108161	44.7074	0.816665	0.0544444	250.545	77.1725	5.14483	-0.263232	0.161881	0.0107682	1.30998	0.814849	0.0542029	173.376	77.0008	5.12202	0.000971888	0.000686439	0.000585391	0.000747906	-0.860728	0.00300999	-0.0989096	1.03332	0.915092	-0.295232	0.610024	21.3345	0.586235
PL5969	CLINO-1885.42-2AW	05/03/22	3.42353	0.0339662	0.0022594	4.33343	0.050759	0.00337644	21.0011	0.0339662	0.0022594	21.4325	0.050759	0.00337644	42.92	0.110904	0.00739358	44.0583	0.562814	0.0375209	194.57	53.6296	3.57531	-0.268108	0.110657	0.00736079	0.703644	0.561562	0.0373545	120.71	53.5103	3.55945	0.00109951	0.000685044	0.000650666	0.000811741	-0.860728	0.00256614	-0.0960174	1.0321	0.913862	-0.302948	0.601189	24.2552	0.57727
PL5979	CLINO-1885.42-2AW	05/05/22	3.44809	0.0195717	0.00190097	4.2611	0.0381377	0.00370426	21.0219	0.0195717	0.00190097	21.3596	0.0381377	0.00370426	42.867	0.102759	0.0100283	43.7384	0.405432	0.0395661	195.293	46.2219	4.5108	-0.269767	0.102269	0.0099332	0.539739	0.403497	0.0391911	121.52	46.0013	4.46804	0.0011846	0.000684114	0.000694182	0.000854298	-0.860728	0.00227024	-0.0940893	1.03128	0.913039	-0.306388	0.597068	25.6475	0.602565
PL5990	CLINO-1885.42-2AW	05/08/22	3.43214	0.0226964	0.00237923	4.27814	0.0408691	0.00428424	21.0073	0.0226964	0.00237923	21.3768	0.0408691	0.00428424	42.8588	0.113194	0.0119316	43.9254	0.505232	0.0532561	183.234	48.8274	5.14686	-0.279436	0.112563	0.0117998	0.685424	0.502417	0.0526677	110.186	48.5554	5.08999	0.00131222	0.000682719	0.000759457	0.000918132	-0.860728	0.0018264	-0.0911971	1.03002	0.9118	-0.318786	0.583444	30.3942	0.589283
PL6002	CLINO-1885.42-2AW	05/11/22	3.33749	0.0260321	0.0027289	4.12633	0.0484292	0.00507676	20.912	0.0260321	0.0027289	21.2235	0.0484292	0.00507676	42.6149	0.0960985	0.0101297	43.4385	0.454502	0.0479087	161.791	37.1464	3.91557	-0.269495	0.0955632	0.0100177	0.51895	0.45197	0.0473794	90.4967	36.9394	3.8723	0.00143985	0.000681324	0.000824732	0.000981967	-0.860728	0.00138255	-0.088305	1.02874	0.910555	-0.311341	0.590265	27.9897	0.602596
PL6714	CLINO-1885.42-2AW	11/11/22	3.47467	0.0369083	0.00274337	4.45154	0.0608428	0.00452241	21.0538	0.0369083	0.00274337	21.5517	0.0608428	0.00452241	43.0777	0.133801	0.00997297	43.2059	0.400352	0.0298405	58.3307	11.5605	0.861672	-0.284902	0.133429	0.00991771	-0.346569	0.399239	0.0296752	-7.38851	11.5284	0.856899	8.89835e-05	-0.000177733	0.00011616	9.13686e-06	-0.841425	0.0260324	-0.103424	1.04229	0.904817	-0.285296	0.607456	22.1745	0.625582
PL6715	CLINO-1885.42-2AW	11/11/22	3.43021	0.0203278	0.00197441	4.37108	0.0435836	0.00423322	21.0087	0.0203278	0.00197441	21.4705	0.0435836	0.00423322	42.9166	0.132765	0.0129565	43.1304	0.527331	0.0514623	52.3025	14.6345	1.42818	-0.315619	0.132131	0.0128337	-0.26003	0.524814	0.0509745	-12.8417	14.5646	1.41464	8.89835e-05	-0.000177733	0.00011616	9.13686e-06	-0.841425	0.0260324	-0.103424	1.04229	0.904817	-0.316012	0.575441	33.2899	0.594885
PL5956	CLINO-1897.08-2AW	04/29/22	3.3844	0.0314875	0.00244391	4.3269	0.0591482	0.00459079	20.9636	0.0314875	0.00244391	21.4258	0.0591482	0.00459079	42.8584	0.116776	0.00909097	43.7549	0.463496	0.0360831	145.381	36.0941	2.80992	-0.282884	0.116421	0.00903603	0.425914	0.46209	0.0358651	74.6177	35.9845	2.79294	-0.000194183	0.000559266	0.000107089	0.000157391	-0.857932	0.0122723	-0.118609	1.03947	0.919701	-0.289629	0.618641	18.567	0.618129
PL5973	CLINO-1897.08-2AW	05/04/22	3.40671	0.0304969	0.00202862	4.39197	0.0571512	0.00380164	20.9871	0.0304969	0.00202862	21.4915	0.0571512	0.00380164	42.9577	0.120197	0.00801313	44.1167	0.48143	0.0320953	183.54	47.5542	3.17028	-0.27459	0.11993	0.0079776	0.64407	0.480359	0.031953	110.252	47.4484	3.15622	-0.000194183	0.000559266	0.000107089	0.000157391	-0.857932	0.0122723	-0.118609	1.03947	0.919701	-0.281351	0.627246	15.88	0.592115
PL5980	CLINO-1897.08-2AW	05/05/22	3.48058	0.0211865	0.00181673	4.51829	0.0394113	0.00337949	21.0617	0.0211865	0.00181673	21.619	0.0394113	0.00337949	43.1632	0.105743	0.00910089	44.0368	0.391832	0.0337235	155.64	33.7046	2.90083	-0.275703	0.10535	0.00903372	0.317771	0.390378	0.0334746	83.7284	33.5795	2.87942	-0.000194183	0.000559266	0.000107089	0.000157391	-0.857932	0.0122723	-0.118609	1.03947	0.919701	-0.282497	0.626055	16.2474	0.591023
PL5991	CLINO-1897.08-2AW	05/08/22	3.38152	0.01944	0.00150884	4.42853	0.0362231	0.00281146	20.9644	0.01944	0.00150884	21.5283	0.0362231	0.00281146	42.959	0.10855	0.00845059	43.9519	0.417335	0.0324895	166.806	38.5268	2.99931	-0.285898	0.10822	0.00839953	0.414067	0.416068	0.0322931	94.5017	38.4099	2.98118	-0.000194183	0.000559266	0.000107089	0.000157391	-0.857932	0.0122723	-0.118609	1.03947	0.919701	-0.292659	0.615492	19.5694	0.581335
PL6005	CLINO-1897.08-2AW	05/12/22	3.22442	0.0286783	0.00278548	4.05548	0.0526651	0.00511529	20.802	0.0286783	0.00278548	21.1519	0.0526651	0.00511529	42.4318	0.123368	0.0120395	44.1481	0.724577	0.0707115	240.444	69.6897	6.80101	-0.265065	0.122779	0.0119254	1.33981	0.721119	0.0700412	164.617	69.357	6.73655	-0.000194183	0.000559266	0.000107089	0.000157391	-0.857932	0.0122723	-0.118609	1.03947	0.919701	-0.271743	0.637233	12.8524	0.581688
PL6702	CLINO-1897.08-2AW	11/08/22	3.49263	0.0199849	0.00229242	4.60198	0.0502702	0.00576639	21.0761	0.0199849	0.00229242	21.7034	0.0502702	0.00576639	43.2597	0.137002	0.0158196	43.7256	0.437232	0.0504872	70.1589	14.6744	1.69446	-0.278957	0.136085	0.0156101	-0.145558	0.434307	0.0498184	3.38901	14.5763	1.67201	8.89835e-05	-0.000177733	0.00011616	9.13686e-06	-0.841425	0.0260324	-0.103424	1.04229	0.904817	-0.279352	0.613651	20.16	0.631522
PL6703	CLINO-1897.08-2AW	11/08/22	3.51528	0.0355068	0.00372212	4.6585	0.0770834	0.00808053	21.0996	0.0355068	0.00372212	21.7604	0.0770834	0.00808053	43.3529	0.168128	0.0177223	44.1187	0.619501	0.0653011	78.7028	20.463	2.15698	-0.26826	0.167192	0.0175264	0.119379	0.61605	0.0645795	11.2641	20.349	2.13315	8.89835e-05	-0.000177733	0.00011616	9.13686e-06	-0.841425	0.0260324	-0.103424	1.04229	0.904817	-0.268656	0.6248	16.6363	0.642211
PL5994	Clino-1927.62-2AW	05/09/22	3.5306	0.0161561	0.00138537	3.90097	0.0314912	0.00270035	21.0878	0.0161561	0.00138537	20.9968	0.0314912	0.00270035	42.5701	0.093883	0.00766552	42.8231	0.453392	0.0370193	152.346	42.8513	3.49879	-0.274505	0.0942947	0.00808571	0.389086	0.465054	0.0398781	85.8565	42.5523	3.64883	0.00135476	0.000682254	0.000781216	0.000939411	-0.860728	0.00167845	-0.0902331	1.0296	0.911385	-0.314496	0.587581	28.9288	0.593879
PL5951	CLINO-1927.6202AW	04/28/22	3.54231	0.0259279	0.00210998	4.04348	0.0495083	0.00402893	21.1039	0.0259279	0.00210998	21.1405	0.0495083	0.00402893	42.7265	0.116877	0.00954293	42.9594	0.361037	0.0294785	134.672	27.9372	2.28106	-0.276404	0.116486	0.00947952	0.222204	0.359831	0.0292826	64.9987	27.8439	2.2659	0.000886804	0.000687369	0.000541874	0.000705349	-0.860728	0.00330588	-0.100838	1.03411	0.915909	-0.306541	0.598911	25.0225	0.573688
PL5975	CLINO-1927.62-2AW	05/04/22	3.50225	0.0332104	0.00270262	4.07873	0.0646924	0.00526459	21.067	0.0332104	0.00270262	21.1759	0.0646924	0.00526459	42.7231	0.138359	0.0112969	43.2317	0.454767	0.0371316	174.658	42.7277	3.4887	-0.276499	0.137897	0.0112219	0.413882	0.453248	0.0368848	102.497	42.5851	3.46552	0.00114205	0.000684579	0.000672424	0.000833019	-0.860728	0.00241819	-0.0950534	1.03169	0.913451	-0.312088	0.591472	27.57	0.596458
PL5987	CLINO-1927.62-2AW	05/07/22	3.55497	0.0384855	0.00298705	3.91514	0.0722762	0.00560972	21.1114	0.0384855	0.00298705	21.0111	0.0722762	0.00560972	42.5987	0.140389	0.0109293	43.3702	0.637801	0.0496527	209.421	52.5256	4.08911	-0.282018	0.139963	0.0108632	0.869743	0.635865	0.0493527	135.432	52.3661	4.0644	-0.000194183	0.000559266	0.000107089	0.000157391	-0.857932	0.0122723	-0.118609	1.03947	0.919701	-0.288722	0.619584	18.269	0.585088
PL6699	CLINO-1927.62-2AW	11/07/22	3.68525	0.01929	0.00165411	4.28178	0.0443504	0.00380302	21.2481	0.01929	0.00165411	21.381	0.0443504	0.00380302	43.0965	0.133967	0.0115301	42.9079	0.391509	0.0336957	56.3009	11.2659	0.969615	-0.298816	0.13347	0.011445	-0.298106	0.390056	0.0334471	-9.16788	11.2241	0.96246	-0.000308202	-0.000177733	0.00011616	-0.000123258	-0.855429	0.0260324	-0.103424	1.02479	0.90424	-0.293504	0.60346	23.496	0.617378
PL6700	CLINO-1927.62-2AW	11/07/22	3.68908	0.0147908	0.00169663	4.29013	0.0387222	0.00444174	21.252	0.0147908	0.00169663	21.3894	0.0387222	0.00444174	43.1294	0.119837	0.0138376	43.0405	0.397664	0.0459182	65.2117	14.1808	1.63746	-0.279437	0.119035	0.0136543	-0.187546	0.395004	0.04531	-0.829714	14.0859	1.61577	-0.000308202	-0.000177733	0.00011616	-0.000123258	-0.855429	0.0260324	-0.103424	1.02479	0.90424	-0.274121	0.623324	17.0954	0.636749
PL7144	CLINO-1926.72-2AW	05/13/23	3.66536	0.00848294	0.000690332	4.19643	0.0123764	0.00100718	21.2262	0.00848294	0.000690332	21.2949	0.0123764	0.00100718	42.9419	0.0800426	0.00653545	41.664	0.365653	0.0298554	16.5211	6.66342	0.544066	-0.342071	0.0797753	0.00649202	-1.32217	0.364432	0.029657	-46.3024	6.64118	0.540451	-0.000906154	-0.000610813	-0.000857567	-0.000791512	-0.860913	-0.00730531	-0.140488	1.06194	0.942654	-0.308082	0.615489	19.5702	0.641158
PL7145	CLINO-1926.72-2AW	05/13/23	3.66897	0.00783319	0.000821141	4.20099	0.0118657	0.00124387	21.2298	0.00783319	0.000821141	21.2995	0.0118657	0.00124387	42.935	0.0942232	0.009932	41.5087	0.287206	0.0302741	13.4365	4.64231	0.489342	-0.356771	0.0936983	0.00982225	-1.48012	0.285606	0.0299396	-49.2084	4.61645	0.483935	-0.000906154	-0.000610813	-0.000857567	-0.000791512	-0.860913	-0.00730531	-0.140488	1.06194	0.942654	-0.322787	0.599873	24.6976	0.626242
PL6165	CLINO-1977.42-2AW	06/13/22	3.40251	0.0340074	0.00309158	3.43971	0.0650476	0.00591342	20.9499	0.0340074	0.00309158	20.5316	0.0650476	0.00591342	41.9219	0.1236	0.0112831	41.2082	0.331194	0.0302337	65.5827	21.8259	1.99242	-0.306224	0.123084	0.0111894	-0.26527	0.329811	0.0299828	1.48579	21.7348	1.97589	-0.000388754	-0.000230359	9.47915e-05	-0.000174774	-0.860283	-0.00273424	-0.109944	1.04396	0.92417	-0.298897	0.612133	20.6497	0.602816
PL6171	CLINO-1977.42-2AW	06/14/22	3.4041	0.0267936	0.00229754	3.44813	0.0464804	0.00398566	20.9517	0.0267936	0.00229754	20.54	0.0464804	0.00398566	41.9233	0.106268	0.00914609	41.296	0.319103	0.027464	81.9308	22.6955	1.95332	-0.314861	0.105874	0.00907859	-0.197602	0.317919	0.0272613	16.8321	22.6113	1.9389	-0.000388754	-0.000230359	9.47915e-05	-0.000174774	-0.860283	-0.00273424	-0.109944	1.04396	0.92417	-0.307534	0.603117	23.6104	0.593905
PL6416	CLINO-1977.42-2AW	08/21/22	3.32751	0.0241908	0.00160915	3.36424	0.0588453	0.00391433	20.8759	0.0241908	0.00160915	20.4553	0.0588453	0.00391433	41.7218	0.132982	0.0088655	41.1546	0.344979	0.0229986	63.8989	16.4304	1.09536	-0.35014	0.132687	0.00882618	-0.167368	0.344211	0.0228966	0.127341	16.3938	1.0905	-0.000416868	-0.0011208	-0.000370242	-0.000635971	-0.855429	-0.0110549	-0.11906	1.06156	0.93433	-0.323607	0.590802	27.8027	0.585638
PL6693	CLINO-1977.42-2AW	11/05/22	3.38056	0.0127267	0.00123612	3.45283	0.0300702	0.00292067	20.9294	0.0127267	0.00123612	20.5447	0.0300702	0.00292067	41.9054	0.109308	0.0106674	41.0233	0.33442	0.032636	52.1752	8.83957	0.862654	-0.314157	0.108787	0.0105663	-0.46859	0.332824	0.0323267	-11.1192	8.79738	0.854477	-0.000308202	-0.000177733	0.00011616	-0.000123258	-0.855429	0.0260324	-0.103424	1.02479	0.90424	-0.308992	0.587589	28.9262	0.6019
PL6694	CLINO-1977.42-2AW	11/05/22	3.38279	0.0162003	0.00157351	3.45825	0.0395521	0.00384164	20.9318	0.0162003	0.00157351	20.5502	0.0395521	0.00384164	41.906	0.128723	0.0125621	41.1157	0.33895	0.0330782	53.0042	10.8853	1.0623	-0.321128	0.128108	0.012443	-0.390541	0.337332	0.0327646	-10.3528	10.8333	1.05223	-0.000308202	-0.000177733	0.00011616	-0.000123258	-0.855429	0.0260324	-0.103424	1.02479	0.90424	-0.315963	0.580445	31.4697	0.594933
PL7121	CLINO-1977.42-2AW	05/09/23	3.44084	0.00798174	0.000836714	3.5037	0.0132946	0.00139366	20.9885	0.00798174	0.000836714	20.5961	0.0132946	0.00139366	41.979	0.0881761	0.00929458	41.7836	0.881471	0.0929152	54.7734	20.5765	2.16895	-0.352767	0.0876849	0.00919187	0.160655	0.87656	0.0918885	-8.83658	20.4619	2.14499	-0.000863428	-0.000831384	-0.000857567	-0.000850793	-0.854552	-0.00579564	-0.140488	1.06907	0.942247	-0.317051	0.603297	23.5505	0.63206
PL7142	CL-1977.42	05/13/23	3.33113	0.00903221	0.00103607	3.50439	0.0125366	0.00143805	20.8842	0.00903221	0.00103607	20.5966	0.0125366	0.00143805	41.8694	0.118242	0.0136534	40.3374	0.400393	0.0462334	11.2366	5.91503	0.683009	-0.353001	0.117451	0.0134726	-1.22865	0.397715	0.045621	-49.6452	5.87547	0.673962	-0.000901882	-0.000615137	-0.000857567	-0.000791529	-0.860277	-0.00715434	-0.140488	1.06265	0.942614	-0.31986	0.602715	23.7445	0.629212
PL6166	CLINO-1956.16-2AW	06/13/22	3.66526	0.0270281	0.0024571	3.73518	0.0491106	0.0044646	21.21	0.0270281	0.0024571	20.83	0.0491106	0.0044646	42.5155	0.11693	0.0106742	41.9879	0.315263	0.0287794	80.6336	22.9311	2.09331	-0.286927	0.116442	0.0105856	-0.101473	0.313946	0.0285406	14.7725	22.8353	2.07594	-0.000388754	-0.000230359	9.47915e-05	-0.000174774	-0.860283	-0.00273424	-0.109944	1.04396	0.92417	-0.279497	0.632386	14.3097	0.622835
PL6182	CLINO-1956.16-2AW	06/18/22	3.65964	0.0413123	0.00307072	3.7044	0.0783076	0.00582056	21.2036	0.0413123	0.00307072	20.7989	0.0783076	0.00582056	42.487	0.137619	0.0102575	42.2772	0.3875	0.0288826	856.756	2097.68	156.352	-0.27795	0.137236	0.0102007	0.236998	0.386422	0.0287225	743.709	2091.84	155.485	-0.000388754	-0.000230359	9.47915e-05	-0.000174774	-0.860283	-0.00273424	-0.109944	1.04396	0.92417	-0.270524	0.641754	11.5129	0.62442
PL6682	CLINO-1956.16-2AW	11/03/22	3.62779	0.0210569	0.00204523	3.7375	0.0546488	0.00530797	21.1745	0.0210569	0.00204523	20.8322	0.0546488	0.00530797	42.4567	0.128427	0.0125332	41.7311	0.439264	0.0428678	52.5497	10.2633	1.00159	-0.309592	0.127814	0.0124144	-0.352306	0.437167	0.0424614	-11.5674	10.2143	0.9921	-0.000308202	-0.000177733	0.00011616	-0.000123258	-0.855429	0.0260324	-0.103424	1.02479	0.90424	-0.304359	0.592337	27.2706	0.60653
PL6683	CLINO-1956.16-2AW	11/03/22	3.6298	0.0140721	0.00147515	3.75339	0.0426295	0.00446878	21.1769	0.0140721	0.00147515	20.8482	0.0426295	0.00446878	42.4872	0.11933	0.0125785	41.9441	0.409034	0.043116	68.0523	15.4126	1.62463	-0.298257	0.118666	0.0124395	-0.179277	0.406756	0.0426396	2.95731	15.3267	1.60667	-0.000308202	-0.000177733	0.00011616	-0.000123258	-0.855429	0.0260324	-0.103424	1.02479	0.90424	-0.29302	0.603957	23.3309	0.617862
PL6695	CLINO-1956.16-2AW	11/06/22	3.68289	0.0347285	0.0023101	3.79844	0.0412854	0.00274627	21.229	0.0347285	0.0023101	20.8938	0.0412854	0.00274627	42.5942	0.119599	0.00797324	41.8828	0.411501	0.0274334	57.1363	12.1545	0.810302	-0.292087	0.119333	0.00793788	-0.327308	0.410586	0.0273118	-7.43428	12.1275	0.806709	-0.000308202	-0.000177733	0.00011616	-0.000123258	-0.855429	0.0260324	-0.103424	1.02479	0.90424	-0.286836	0.610293	21.2466	0.624042
PL7123	CLINO-1956.16-2AW	05/09/23	3.60974	0.00684288	0.000717329	3.64769	0.0113498	0.00118978	21.1542	0.00684288	0.000717329	20.7416	0.0113498	0.00118978	42.3009	0.09397	0.00990531	41.6053	0.469822	0.0495235	49.0163	12.7223	1.34105	-0.35139	0.0934465	0.00979586	-0.295602	0.467204	0.0489763	-14.6929	12.6514	1.32623	-0.000867701	-0.000827059	-0.000857567	-0.000850776	-0.855188	-0.00594661	-0.140488	1.06835	0.942288	-0.315401	0.605328	22.8761	0.633734
PL7124	CLINO-1956.16-2AW	05/09/23	3.61521	0.00699882	0.000733675	3.65588	0.0125157	0.00131201	21.1596	0.00699882	0.000733675	20.7499	0.0125157	0.00131201	42.3179	0.0887125	0.00935112	41.6982	0.522509	0.0550772	51.262	15.3958	1.62286	-0.348584	0.0882182	0.00924779	-0.222624	0.519598	0.0544686	-12.605	15.31	1.60492	-0.000867701	-0.000827059	-0.000857567	-0.000850776	-0.855188	-0.00594661	-0.140488	1.06835	0.942288	-0.312581	0.608341	21.8841	0.636595
PL6319	CLINO-2026.58-2AW	07/22/22	3.72578	0.067746	0.00525811	3.42748	0.130636	0.0101393	21.2568	0.067746	0.00525811	20.5199	0.130636	0.0101393	42.2347	0.198586	0.0154599	41.3413	0.403748	0.0314317	61.5271	16.302	1.26911	-0.305013	0.197983	0.0153664	-0.114668	0.402522	0.0312418	-2.62298	16.2525	1.26144	-0.00165113	0.00706754	-0.0157036	-0.00342907	-0.831021	-0.0247262	0.303716	0.766626	0.726659	-0.160188	0.603856	23.3645	0.657067
PL6326	CLINO-2026.58-2AW	07/24/22	3.75536	0.0605363	0.00519094	3.53698	0.119389	0.0102376	21.2887	0.0605363	0.00519094	20.6304	0.119389	0.0102376	42.3715	0.185575	0.0159718	41.4563	0.35354	0.0304279	52.5717	12.4622	1.07257	-0.312346	0.184887	0.0158539	-0.220611	0.352228	0.0302033	-11.2805	12.4159	1.06466	-0.00183505	0.00800069	-0.0174932	-0.00377585	-0.831035	-0.024351	0.350799	0.731013	0.708546	-0.152357	0.597171	25.6127	0.664029
PL6331	CLINO-2026.58-2AW	07/26/22	3.77531	0.0505977	0.00348329	3.56019	0.186243	0.0128215	21.3085	0.0505977	0.00348329	20.6538	0.186243	0.0128215	42.3729	0.551441	0.0367627	41.1138	1.00411	0.0669404	38.6295	20.1263	1.34175	-0.361427	0.567846	0.0390921	-0.607128	1.02634	0.0706562	-26.3024	19.1101	1.3156	-0.000680888	-0.000903433	-0.000213651	-0.000599324	-0.866217	-0.00819313	-0.120262	1.04586	0.932356	-0.336032	0.580912	31.3013	0.552218
PL6340	CLINO-2026.58-2AW	07/29/22	3.71473	0.0368435	0.00245079	3.40083	0.071216	0.00473722	21.2454	0.0368435	0.00245079	20.493	0.071216	0.00473722	42.1909	0.136497	0.00909977	41.1891	0.386219	0.0257479	54.3889	15.3756	1.02504	-0.309583	0.136193	0.00905942	-0.20809	0.38536	0.0256337	-9.26672	15.3414	1.0205	-0.00229483	0.0103336	-0.0219671	-0.00464278	-0.831071	-0.0234129	0.468508	0.649614	0.669171	-0.113699	0.59531	26.2476	0.681876
PL6691	CLINO-2026.58-2AW	11/05/22	3.64543	0.0603024	0.00401126	3.43171	0.0509443	0.00338876	21.1805	0.0603024	0.00401126	20.524	0.0509443	0.00338876	42.1774	0.14209	0.00947269	41.6887	0.609156	0.0406104	82.711	26.9946	1.79964	-0.28686	0.141774	0.00943069	0.210876	0.607801	0.0404303	17.3537	26.9345	1.79166	-0.000308202	-0.000177733	0.00011616	-0.000123258	-0.855429	0.0260324	-0.103424	1.02479	0.90424	-0.281661	0.615597	19.5355	0.629215
PL7125	CLINO-2026.58-2AW	05/09/23	3.84297	0.00771561	0.000885041	3.75124	0.00944266	0.00108315	21.3795	0.00771561	0.000885041	20.8465	0.00944266	0.00108315	42.6596	0.0910521	0.0105138	41.1823	0.322247	0.0372098	26.2336	5.27096	0.608639	-0.335932	0.090443	0.0103745	-0.906887	0.320091	0.036717	-36.5132	5.23571	0.600577	-0.000871973	-0.000822733	-0.000857567	-0.000850758	-0.855825	-0.00609757	-0.140488	1.06764	0.942329	-0.299639	0.622424	17.3766	0.649723
PL7137	CL-2026.58-2AW	05/12/23	3.84113	0.00708108	0.000742299	3.85211	0.0120623	0.00126448	21.3813	0.00708108	0.000742299	20.9482	0.0120623	0.00126448	42.7593	0.0868223	0.00915187	41.9029	0.602032	0.0634598	40.0173	15.6387	1.64847	-0.340086	0.0863386	0.00905074	-0.414594	0.598678	0.0627585	-23.7651	15.5516	1.63025	-0.000897609	-0.000796777	-0.000857567	-0.000850651	-0.859641	-0.00700338	-0.140488	1.06336	0.942574	-0.303713	0.619618	18.2582	0.645591
PL5952	CLINO-2078-3AW	04/28/22	4.10108	0.0289144	0.00235302	4.3337	0.0518658	0.00422078	21.6453	0.0289144	0.00235302	21.4342	0.0518658	0.00422078	43.5842	0.114989	0.00938884	44.3333	0.634808	0.0518319	204.171	56.7968	4.63744	-0.283856	0.114605	0.00932645	0.963886	0.632688	0.0514875	128.954	56.6072	4.60662	0.000886804	0.000687369	0.000541874	0.000705349	-0.860728	0.00330588	-0.100838	1.03411	0.915909	-0.314598	0.590578	27.8806	0.565652
PL5971	CLINO-2078-3AW	05/03/22	4.11915	0.0292365	0.00265787	4.30702	0.0540499	0.00491362	21.6615	0.0292365	0.00265787	21.4074	0.0540499	0.00491362	43.5818	0.119225	0.0108837	44.168	0.555903	0.0507468	213.31	60.9283	5.56197	-0.276689	0.118727	0.0107934	0.858107	0.553582	0.0503256	137.561	60.6739	5.51581	0.00109951	0.000685044	0.000650666	0.000811741	-0.860728	0.00256614	-0.0960174	1.0321	0.913862	-0.312066	0.591778	27.464	0.596482
PL5988	CLINO-2078-3AW	05/08/22	4.00671	0.0499953	0.00332564	4.1332	0.0927179	0.0061675	21.5486	0.0499953	0.00332564	21.2319	0.0927179	0.0061675	43.3035	0.157406	0.0104937	44.7527	1.23626	0.0824172	343.152	129.31	8.62067	-0.260358	0.157056	0.0104472	1.76264	1.23351	0.0820517	259.871	129.022	8.58244	0.00131222	0.000682719	0.000759457	0.000918132	-0.860728	0.0018264	-0.0911971	1.03002	0.9118	-0.300117	0.602673	23.7586	0.609284
PL5995_20V	Clino-2078-3AW	05/09/22	4.09389	0.0201719	0.00172972	4.31134	0.0369423	0.00316777	21.6377	0.0201719	0.00172972	21.4117	0.0369423	0.00316777	43.5649	0.112669	0.00969702	44.1482	0.621101	0.0534558	225.642	66.683	5.73916	-0.272903	0.112251	0.00962546	0.830634	0.618796	0.0530613	149.143	66.4356	5.69681	0.00135476	0.000682254	0.000781216	0.000939411	-0.860728	0.00167845	-0.0902331	1.0296	0.911385	-0.313828	0.588268	28.6876	0.594594
PL6688	CLINO-2078-3AW	11/04/22	4.19922	0.0126259	0.00114781	4.47774	0.0390953	0.00355412	21.7436	0.0126259	0.00114781	21.5796	0.0390953	0.00355412	43.8346	0.121772	0.0111163	43.6204	0.526276	0.0480422	74.7484	21.0201	1.91886	-0.283137	0.121264	0.011024	-0.00417369	0.524079	0.0476435	7.23024	20.9323	1.90294	-0.000308202	-0.000177733	0.00011616	-0.000123258	-0.855429	0.0260324	-0.103424	1.02479	0.90424	-0.277734	0.619621	18.2571	0.633139
PL5995	Clino-2078-3AW	05/09/22	4.09389	0.0201719	0.00172972	4.31134	0.0369423	0.00316777	21.6377	0.0201719	0.00172972	21.4117	0.0369423	0.00316777	43.5649	0.112669	0.00969702	44.1482	0.621101	0.0534558	225.642	66.683	5.73916	-0.272903	0.112251	0.00962546	0.830634	0.618796	0.0530613	149.143	66.4356	5.69681	0.00135476	0.000682254	0.000781216	0.000939411	-0.860728	0.00167845	-0.0902331	1.0296	0.911385	-0.313828	0.588268	28.6876	0.594594
PL7126	CLINO-2078-3AW	05/10/23	4.25193	0.00884175	0.000657202	4.56723	0.0130271	0.000968298	21.7969	0.00884175	0.000657202	21.6699	0.0130271	0.000968298	43.9166	0.0880601	0.00656361	43.3254	0.531365	0.0396056	41.3688	11.7792	0.877971	-0.345246	0.0878151	0.00652725	-0.463613	0.529887	0.0393862	-24.2761	11.7464	0.873106	-0.000876246	-0.000818407	-0.000857567	-0.00085074	-0.856461	-0.00624854	-0.140488	1.06692	0.94237	-0.307885	0.613881	20.086	0.641358
PL7127	CLINO-2078-3AW	05/10/23	4.257	0.00779453	0.000997988	4.5831	0.0132444	0.00169578	21.8022	0.00779453	0.000997988	21.686	0.0132444	0.00169578	43.9313	0.0782541	0.0101026	43.9433	0.884758	0.114222	57.1167	20.5201	2.64913	-0.352035	0.0775993	0.00993557	0.0970727	0.877354	0.112334	-9.557	20.3483	2.60534	-0.000876246	-0.000818407	-0.000857567	-0.00085074	-0.856461	-0.00624854	-0.140488	1.06692	0.94237	-0.314661	0.606651	22.4391	0.634485
PL5662	CLINO-2102.08-3AW	02/21/22	4.19778	0.0247677	0.00201557	4.43575	0.0425931	0.00346617	21.7408	0.0247677	0.00201557	21.5373	0.0425931	0.00346617	43.7454	0.111617	0.00911352	43.4408	0.421259	0.0343957	58.2466	18.7999	1.535	-0.32498	0.111245	0.00905297	-0.0933699	0.419852	0.0341671	-8.15119	18.7371	1.52481	-0.00036694	-0.000466169	-0.000468268	-0.000433792	-0.852699	0.00384712	-0.114379	1.05088	0.923006	-0.306004	0.601433	24.1735	0.598365
PL5663	CLINO-2102.08-3AW	02/22/22	4.22503	0.028014	0.00186347	4.49327	0.04903	0.00326142	21.7687	0.028014	0.00186347	21.5953	0.04903	0.00326142	43.8286	0.109502	0.00730015	43.4605	0.445241	0.0296827	57.8832	16.6044	1.10696	-0.329341	0.109259	0.00726778	-0.188124	0.44425	0.0295511	-8.6314	16.5674	1.10205	-0.00036694	-0.000466169	-0.000468268	-0.000433792	-0.852699	0.00384712	-0.114379	1.05088	0.923006	-0.310328	0.596888	25.7089	0.593588
P5634_	CLINO 2102.08 3AW	02/15/22	4.19782	0.0202838	0.00184398	4.47256	0.0379935	0.00345395	21.7421	0.0202838	0.00184398	21.5744	0.0379935	0.00345395	43.7735	0.0935658	0.00854135	43.0627	0.345981	0.0315836	44.7002	8.86401	0.80917	-0.335096	0.0931751	0.00847047	-0.528283	0.344536	0.0313215	-20.9189	8.827	0.802455	-0.00036694	-0.000466169	-0.000468268	-0.000433792	-0.852699	0.00384712	-0.114379	1.05088	0.923006	-0.316107	0.590815	27.7983	0.526506
P5623	CLINO-2102.08-3AW	02/12/22	4.19135	0.026546	0.00216028	4.23015	0.0471775	0.00383925	21.7275	0.026546	0.00216028	21.33	0.0471775	0.00383925	43.5225	0.101542	0.00829085	42.6216	0.335316	0.0273784	42.3579	9.62564	0.785931	-0.325632	0.101203	0.00823576	-0.472859	0.334196	0.0271965	-22.6398	9.5935	0.780708	0.000368418	-0.00171745	0.00022994	-0.000373032	-0.846118	-0.0305071	-0.111832	1.0852	0.943149	-0.309397	0.607393	22.1952	0.605001
PL5874	CLINO-2102.08-3AW	04/09/22	4.08666	0.00910611	0.000676852	4.63416	0.0171932	0.00127796	21.6421	0.00910611	0.000676852	21.7371	0.0171932	0.00127796	43.8853	0.093021	0.00693338	44.7087	0.485849	0.036213	279.65	47.4275	3.53504	-0.283504	0.0927623	0.00689497	0.730218	0.484497	0.0360124	199.023	47.2956	3.51545	0.00083206	-0.000193789	0.000335234	0.000324502	-0.87104	0.00728806	-0.091404	1.0136	0.908308	-0.297745	0.606514	22.4845	0.5922
PL5953	CLINO-2102.08-3AW	04/29/22	3.67211	0.0168455	0.00112055	3.09496	0.0289402	0.00192507	21.1942	0.0168455	0.00112055	20.1846	0.0289402	0.00192507	41.8559	0.14491	0.00966064	42.359	1.03859	0.0692397	352.883	122.642	8.17615	-0.282106	0.144587	0.0096178	1.52058	1.03628	0.0689326	272.03	122.369	8.1399	0.000929346	0.000686904	0.000563632	0.000726628	-0.860728	0.00315793	-0.0998736	1.03372	0.915501	-0.312519	0.592444	27.2335	0.567725
PL5972	CLINO-2102.08-3AW	05/03/22	3.65142	0.0472002	0.00350836	2.91814	0.0829855	0.00616826	21.1683	0.0472002	0.00350836	20.0063	0.0829855	0.00616826	41.6756	0.157572	0.0117447	41.8672	0.87197	0.0649928	276.751	100.016	7.45476	-0.257288	0.157133	0.0116796	1.39797	0.869544	0.0646327	200.893	99.7379	7.41346	0.00109951	0.000685044	0.000650666	0.000811741	-0.860728	0.00256614	-0.0960174	1.0321	0.913862	-0.291117	0.613399	20.241	0.618926
C010486	CLINO-2102.08	08/01/22	2.74231	0.0281527	0.00273443	1.02256	0.0369992	0.00359368	19.417	0.0281527	0.00273443	17.311	0.0369992	0.00359368	37.1009	0.174835	0.0170622	34.3683	0.868954	0.0848012	0.705363	28.3569	2.76735	-0.286252	0.174001	0.0169005	-0.534582	0.864806	0.0839974	-52.1124	28.2216	2.74112	-0.000294417	0.00042276	0.000179008	-0.768937	-0.0179915	-0.11889	0.026624	0.946972	-0.292893	0.59642	0.601	25.8684	0.58105
PL6161	CLINO-2177-2AW	06/12/22	3.82678	0.0338057	0.00262383	4.0833	0.0654329	0.00507858	21.3757	0.0338057	0.00262383	21.1812	0.0654329	0.00507858	43.0086	0.129122	0.0100521	42.7751	0.378963	0.0295023	90.7829	19.3402	1.50563	-0.319781	0.12873	0.00999141	-0.0343569	0.377813	0.029324	23.434	19.2815	1.49653	-0.00201667	0.00111676	0.000909609	3.233e-06	-0.877233	-0.0392737	-0.132895	1.06213	0.957125	-0.31992	0.617329	18.9833	0.574907
PL6176	CLINO-2177-2AW	06/16/22	3.80566	0.0647232	0.00430532	4.04982	0.0686034	0.00456343	21.3545	0.0647232	0.00430532	21.1474	0.0686034	0.00456343	42.9795	0.13029	0.008686	42.6582	0.362888	0.0241925	92.5772	20.7502	1.38335	-0.293651	0.13	0.00864748	-0.0802275	0.362081	0.0240853	25.2069	20.7041	1.37721	-0.00240841	0.00114543	0.0010164	-8.21946e-05	-0.877233	-0.0423009	-0.135602	1.06599	0.960513	-0.290118	0.651251	8.75919	0.605763
PL6183	CLINO-2177-2AW	06/18/22	3.79266	0.042647	0.00347057	4.08595	0.08012	0.00652007	21.3434	0.042647	0.00347057	21.1838	0.08012	0.00652007	43.0044	0.143142	0.0116875	42.9443	0.38107	0.0311143	839.467	6064.68	495.179	-0.293566	0.142664	0.0116099	0.122885	0.379798	0.0309075	725.942	6044.43	491.889	-0.00260428	0.00115976	0.00106979	-0.000124908	-0.877233	-0.0438145	-0.136956	1.06793	0.962216	-0.288195	0.654445	7.85075	0.597063
PL6190	CLINO-2177-2AW	06/20/22	3.87594	0.0162778	0.00108278	4.28527	0.0242174	0.00161092	21.4295	0.0162778	0.00108278	21.3849	0.0242174	0.00161092	43.2969	0.128235	0.00854901	43.5193	0.481366	0.0320911	3454.24	32721.5	2181.43	-0.29384	0.12795	0.0085111	0.280265	0.480295	0.0319488	3177.35	32648.7	2171.76	-0.00280015	0.0011741	0.00112318	-0.000167622	-0.877233	-0.0453281	-0.138309	1.06988	0.963926	-0.286582	0.657319	7.041	0.598673
PL6679	CLINO-2177-2AW	11/02/22	3.74964	0.0295594	0.00219713	4.10412	0.0452067	0.00336019	21.3031	0.0295594	0.00219713	21.202	0.0452067	0.00336019	42.985	0.105861	0.00789043	42.6915	0.410983	0.0306328	59.7499	16.4549	1.22647	-0.289106	0.105567	0.00784672	-0.155217	0.40984	0.0304631	-5.64741	16.4091	1.21968	-0.000308202	-0.000177733	0.00011616	-0.000123258	-0.855429	0.0260324	-0.103424	1.02479	0.90424	-0.283808	0.613397	20.2418	0.627068
PL7128	CLINO-2177-2AW	05/10/23	3.84636	0.00779784	0.00114973	4.22721	0.00963213	0.00142018	21.3994	0.00779784	0.00114973	21.3263	0.00963213	0.00142018	43.1462	0.0893571	0.0133206	42.801	0.445718	0.0664437	45.3737	12.0882	1.802	-0.351406	0.0883587	0.0130278	-0.293652	0.440738	0.0649832	-19.4695	11.9531	1.76239	-0.000884791	-0.000809755	-0.000857567	-0.000850704	-0.857733	-0.00655047	-0.140488	1.0655	0.942452	-0.314701	0.60714	22.2785	0.634445
PL7129	CLINO-2177-2AW	05/10/23	3.82907	0.00868669	0.00111222	4.18668	0.0141255	0.00180858	21.3815	0.00868669	0.00111222	21.2854	0.0141255	0.00180858	43.1163	0.132291	0.0170786	42.5583	0.452466	0.0584131	35.5149	10.0445	1.29674	-0.322649	0.131184	0.0167963	-0.446278	0.44868	0.0574476	-28.6222	9.96045	1.2753	-0.000884791	-0.000809755	-0.000857567	-0.000850704	-0.857733	-0.00655047	-0.140488	1.0655	0.942452	-0.28597	0.637753	12.6975	0.663588
PL6680	CLINO-2128.15-2AW	11/03/22	4.00195	0.0173803	0.00134897	4.32686	0.0486183	0.00377351	21.5508	0.0173803	0.00134897	21.4271	0.0486183	0.00377351	43.491	0.136002	0.0105878	43.1957	0.426624	0.0332126	67.6429	16.2044	1.26151	-0.270898	0.13559	0.0105238	-0.112575	0.425329	0.0330119	1.06602	16.1553	1.25389	0.00192531	0.000154097	0.000149781	0.000743061	-0.853813	0.102138	-0.0696831	0.956196	0.847386	-0.303214	0.557453	40.1136	0.513268
PL6164	CLINO-2128.15-2AW	06/13/22	4.02099	0.034406	0.00295029	4.2937	0.0688565	0.0059044	21.5677	0.034406	0.00295029	21.3937	0.0688565	0.0059044	43.4399	0.131864	0.011349	43.3823	0.379382	0.032652	120.354	20.432	1.75851	-0.304852	0.131374	0.0112653	0.131681	0.377974	0.032411	50.539	20.3562	1.74553	-0.0021146	0.00112393	0.000936306	-1.81239e-05	-0.877233	-0.0400305	-0.133572	1.06309	0.957969	-0.304064	0.634722	13.6046	0.591324
PL6172	CLINO-2128.15-2AW	06/14/22	4.0497	0.0384286	0.00440806	4.35323	0.0700084	0.00803052	21.5971	0.0384286	0.00440806	21.4538	0.0700084	0.00803052	43.5336	0.116548	0.0134578	43.7985	0.291643	0.033676	109.872	18.4894	2.13497	-0.302515	0.115768	0.0132795	0.412896	0.289692	0.0332299	40.5579	18.3657	2.10669	-0.00221254	0.00113109	0.000963002	-3.94808e-05	-0.877233	-0.0407873	-0.134249	1.06405	0.958816	-0.300796	0.638752	12.4001	0.594707
PL6179	CLINO-2128.15-2AW	06/17/22	3.96304	0.0701909	0.00601882	4.13937	0.132342	0.0113482	21.5072	0.0701909	0.00601882	21.238	0.132342	0.0113482	43.2447	0.186275	0.016032	42.9946	0.400263	0.0344492	11.5007	1545.23	132.992	-0.280907	0.185584	0.0159137	0.0648992	0.398778	0.0341949	-51.187	1539.49	132.01	-0.00250634	0.0011526	0.00104309	-0.000103551	-0.877233	-0.0430577	-0.136279	1.06696	0.961364	-0.276429	0.666426	4.52001	0.619937
PL6721	CLINO-2128.17-2AW	11/12/22	2.92687	0.0507858	0.00377488	1.89695	0.10451	0.00776819	20.4437	0.0507858	0.00377488	18.9754	0.10451	0.00776819	39.8182	0.189866	0.0141517	37.9477	0.353918	0.0263795	48.383	10.2591	0.764667	-0.315405	0.189337	0.0140733	-0.349522	0.352934	0.0262334	-11.1976	10.2305	0.76043	0.000199272	0.000855482	0.000223267	0.000426007	-0.828777	0.278969	-0.00220332	0.840739	0.740292	-0.332368	0.460857	86.6192	0.488761
PL6722	CLINO-2128.17-2AW	11/12/22	2.93017	0.0661965	0.00693928	1.90288	0.133946	0.0140414	20.4471	0.0661965	0.00693928	18.9814	0.133946	0.0140414	39.8226	0.197084	0.0207744	37.9255	0.400032	0.0421671	55.8638	13.8985	1.46503	-0.320326	0.195986	0.0205449	-0.382651	0.397804	0.0417012	-4.15702	13.8211	1.44884	8.89835e-05	-0.000177733	0.00011616	9.13686e-06	-0.841425	0.0260324	-0.103424	1.04229	0.904817	-0.32069	0.570565	35.0957	0.590209
PL7150	CLINO-2128.15-2AW	05/14/23	3.96562	0.00784601	0.000822485	4.36209	0.0118499	0.0012422	21.5175	0.00784601	0.000822485	21.4625	0.0118499	0.0012422	43.4043	0.0873436	0.00920683	42.1983	0.351958	0.0370996	22.2311	5.60908	0.591249	-0.354366	0.086857	0.00910509	-1.13785	0.349997	0.0366897	-41.5459	5.57783	0.584716	-0.000910427	-0.000606489	-0.000857567	-0.000791495	-0.861549	-0.00745628	-0.140488	1.06123	0.942694	-0.320012	0.603088	23.62	0.629058
PL7151	CLINO-2128.15-2AW	05/15/23	3.96598	0.00811657	0.0006033	4.36272	0.0120079	0.00089254	21.5178	0.00811657	0.0006033	21.4632	0.0120079	0.00089254	43.4103	0.0943558	0.00703287	42.1611	0.315544	0.0235193	20.8973	6.60645	0.492416	-0.34965	0.0940933	0.0069939	-1.17475	0.314667	0.023389	-42.7981	6.58807	0.489688	-0.000910427	-0.000606489	-0.000857567	-0.000791495	-0.861549	-0.00745628	-0.140488	1.06123	0.942694	-0.315291	0.608098	21.9639	0.633846
PL6362	CLINO-1204.42	08/04/22	2.31328	0.0430951	0.00286665	2.04267	0.0850896	0.00566008	19.8654	0.0430951	0.00286665	19.121	0.0850896	0.00566008	39.3361	0.142992	0.00953283	38.2554	0.356875	0.0237916	44.6111	11.9063	0.79375	-0.334741	0.142674	0.00949055	-0.338897	0.356081	0.0236861	-14.4366	11.8798	0.79023	-0.00284657	0.013133	-0.0273358	-0.00568311	-0.831114	-0.0222873	0.609758	0.566253	0.63158	-0.111189	0.568619	35.8252	0.68414
P4997	CLINO-1204.42	09/13/21	2.15904	0.00758939	0.000795584	1.68671	0.0143814	0.00150758	19.7063	0.00758939	0.000795584	18.7618	0.0143814	0.00150758	38.7668	0.132944	0.0140135	37.3256	0.52623	0.0554696	31.1274	10.3962	1.09586	-0.375123	0.132203	0.0138586	-0.529741	0.523299	0.0548566	-26.3221	10.3383	1.08375	-0.0021043	-0.00196674	-0.00181278	-0.00196127	-0.87513	-0.0112878	-0.130451	1.04197	0.938776	-0.299091	0.627131	15.9153	0.6273
PL6385	CLINO-1204.42	08/12/22	2.27837	0.044307	0.00294726	1.94219	0.0942953	0.00627243	19.8287	0.044307	0.00294726	19.0196	0.0942953	0.00627243	39.2063	0.154618	0.0103079	38.2532	0.408337	0.0272224	53.4679	12.2144	0.814293	-0.324692	0.154274	0.0102622	-0.142069	0.407428	0.0271017	-5.8479	12.1872	0.810682	-0.000434607	-0.00244654	-0.000480092	-0.00112041	-0.882328	-0.043978	-0.114246	1.04768	0.94898	-0.280765	0.654829	7.74204	0.53214
PL6390	CLINO-1207.67	08/13/22	3.28536	0.0463348	0.00359628	2.28796	0.09635	0.00747821	20.7982	0.0463348	0.00359628	19.3703	0.09635	0.00747821	40.5737	0.161711	0.0120532	38.8622	0.377257	0.0281191	47.9519	10.0813	0.751414	-0.33375	0.165256	0.0128263	-0.236823	0.382856	0.0297154	-12.8786	10.2456	0.795217	-0.0003939	-0.00266293	-0.00048317	-0.00118	-0.882329	-0.0492071	-0.109808	1.04838	0.949501	-0.285873	0.649797	9.17549	0.527846
PL6381	CLINO-1211	08/11/22	3.59377	0.053027	0.0035273	2.62556	0.103751	0.0069014	21.1033	0.053027	0.0035273	19.7113	0.103751	0.0069014	41.2498	0.187757	0.0125171	39.6735	0.673231	0.0448821	58.1852	15.8341	1.05561	-0.315963	0.187339	0.0124616	-0.132113	0.671734	0.0446831	-4.05341	15.7989	1.05093	-0.000475314	-0.00223015	-0.000477014	-0.00106082	-0.882327	-0.0387489	-0.118684	1.04675	0.948383	-0.272204	0.663452	5.33568	0.539337
PL6363	CLINO-1213.41	08/04/22	3.37147	0.0459952	0.0034188	2.18614	0.0891554	0.00662687	20.8765	0.0459952	0.0034188	19.2678	0.0891554	0.00662687	40.5537	0.148162	0.0110433	38.8068	0.381715	0.0284514	59.9665	13.3448	0.994661	-0.327968	0.14775	0.0109821	-0.0962131	0.380654	0.0282938	-1.28757	13.3077	0.98915	-0.00284657	0.013133	-0.0273358	-0.00568311	-0.831114	-0.0222873	0.609758	0.566253	0.63158	-0.0974966	0.576372	32.9487	0.696494
P5026	CLINO-1213.41	09/19/21	3.53533	0.00689702	0.000723004	10.2766	0.0137997	0.0014466	21.0373	0.00689702	0.000723004	19.4098	0.0137997	0.0014466	40.8348	0.121562	0.0128138	38.1272	0.495778	0.0522596	18.4137	7.30588	0.770108	-0.357195	0.120885	0.0126722	-1.02866	0.493016	0.0516821	-40.8626	7.26518	0.761598	-0.00212248	-0.00199684	-0.00177165	-0.00196366	-0.87513	-0.0170323	-0.130884	1.04668	0.942525	-0.27701	0.652586	8.37845	0.635987
P4994	CLINO-1215	09/13/21	2.7916	0.00808758	0.000847809	0.583665	0.0132672	0.00139078	20.2692	0.00808758	0.000847809	17.6512	0.0132672	0.00139078	38.2839	0.128773	0.0135739	34.7595	0.529005	0.055762	24.2366	10.0811	1.06264	-0.33709	0.128056	0.0134239	-0.824994	0.526058	0.0551458	-31.3236	10.0249	1.0509	-0.0021043	-0.00196674	-0.00181278	-0.00196127	-0.87513	-0.0112878	-0.130451	1.04197	0.938776	-0.262005	0.665773	4.69853	0.66796
P5032	CLINO-1215	09/20/21	2.83043	0.00820579	0.000745981	0.763742	0.0143329	0.00130299	20.3124	0.00820579	0.000745981	17.8328	0.0143329	0.00130299	38.4725	0.137	0.0125063	34.9902	0.441975	0.0403466	20.4234	7.00166	0.639161	-0.3746	0.136428	0.0124026	-0.958817	0.440129	0.0400117	-35.3119	6.97242	0.633857	-0.00209273	-0.00195053	-0.00183677	-0.00196001	-0.87513	-0.00819467	-0.130198	1.03943	0.936753	-0.299193	0.625764	16.3374	0.612834
PL6380	CLINO-1215	08/10/22	3.20775	0.0515411	0.00441961	1.6954	0.100025	0.00857707	20.7037	0.0515411	0.00441961	18.7728	0.100025	0.00857707	39.8979	0.163462	0.0140686	37.7046	0.378307	0.0325595	54.6114	15.3303	1.31942	-0.306102	0.162855	0.0139647	-0.186167	0.376903	0.0323192	-5.20468	15.2734	1.30968	-0.000516021	-0.00201375	-0.000473936	-0.00100124	-0.882326	-0.0335198	-0.123122	1.04561	0.947709	-0.266155	0.669416	3.70725	0.544422
P5032	CLINO-1215	09/20/21	2.83043	0.00820579	0.000745981	0.763742	0.0143329	0.00130299	20.3124	0.00820579	0.000745981	17.8328	0.0143329	0.00130299	38.4725	0.137	0.0125063	34.9902	0.441975	0.0403466	20.4234	7.00166	0.639161	-0.3746	0.136428	0.0124026	-0.958817	0.440129	0.0400117	-35.3119	6.97242	0.633857	-0.00212248	-0.00199684	-0.00177165	-0.00196366	-0.87513	-0.0170323	-0.130884	1.04668	0.942525	-0.299053	0.629514	15.184	0.612934
PL6391	CLINO-1226.67	08/13/22	3.33289	0.0395645	0.00282603	1.89047	0.0731211	0.00522293	20.8295	0.0395645	0.00282603	18.9697	0.0731211	0.00522293	40.2154	0.136409	0.00976843	37.5705	0.362587	0.0259654	24.2397	10.9401	0.783434	-0.317995	0.136059	0.00971846	-0.701664	0.361656	0.0258326	-34.3474	10.912	0.779427	-0.0003939	-0.00266293	-0.00048317	-0.00118	-0.882329	-0.0492071	-0.109808	1.04838	0.949501	-0.270541	0.665871	4.67175	0.540735
P5015	CLINO-1231.85	09/17/21	2.6273	0.00773108	0.000574647	0.0153762	0.0126411	0.000939607	20.0931	0.00773108	0.000574647	17.078	0.0126411	0.000939607	37.515	0.131584	0.00980767	33.8098	0.475453	0.0354382	26.0298	8.06417	0.601068	-0.345962	0.131218	0.00975333	-0.616458	0.474131	0.0352419	-28.374	8.04174	0.597738	-0.00209769	-0.00195748	-0.00182649	-0.00196055	-0.87513	-0.00952032	-0.130306	1.04052	0.937619	-0.272412	0.65417	7.92872	0.640845
PL6386	CLINO-1231.85	08/12/22	3.22178	0.0342964	0.00254923	1.74547	0.0727414	0.00540682	20.7188	0.0342964	0.00254923	18.8233	0.0727414	0.00540682	39.9336	0.132734	0.00989339	37.5929	0.356864	0.0265991	42.2294	8.86652	0.660871	-0.335739	0.132365	0.00983858	-0.392866	0.355872	0.0264517	-16.9957	8.84185	0.65721	-0.000434607	-0.00244654	-0.000480092	-0.00112041	-0.882328	-0.043978	-0.114246	1.04768	0.94898	-0.290997	0.644109	10.8224	0.523539
P5019	CLINO-1243.08	09/17/21	3.65828	0.00831208	0.000871343	2.36714	0.0135836	0.00142394	21.1556	0.00831208	0.000871343	19.4509	0.0135836	0.00142394	40.9972	0.138069	0.0145537	38.1713	0.512912	0.0540656	17.0409	8.03418	0.846877	-0.360352	0.137299	0.0143929	-1.06677	0.510054	0.0534682	-42.3496	7.98942	0.837519	-0.00209769	-0.00195748	-0.00182649	-0.00196055	-0.87513	-0.00952032	-0.130306	1.04052	0.937619	-0.279975	0.6463	10.1845	0.632935
PL6361	CLINO-1243.08	08/03/22	3.75962	0.0466887	0.00453481	2.71964	0.0922782	0.00896285	21.2642	0.0466887	0.00453481	19.8065	0.0922782	0.00896285	41.5019	0.159075	0.0155241	39.8587	0.377487	0.036839	55.1176	13.4243	1.31008	-0.328208	0.158315	0.0153769	-0.14065	0.375685	0.0364898	-7.28957	13.3603	1.29766	-0.00275462	0.0126664	-0.026441	-0.00550972	-0.831107	-0.0224749	0.586217	0.579112	0.637204	-0.0995444	0.579556	31.7905	0.694646
PL6382	CLINO-1243.08	08/11/22	3.72909	0.0484778	0.00360333	2.62662	0.093776	0.00697032	21.232	0.0484778	0.00360333	19.7126	0.093776	0.00697032	41.3671	0.162656	0.0121237	39.7943	0.419328	0.0312549	65.8697	18.8427	1.40445	-0.334611	0.162204	0.0120565	-0.0185794	0.418162	0.0310817	3.04172	18.7903	1.39667	-0.000475314	-0.00223015	-0.000477014	-0.00106082	-0.882327	-0.0387489	-0.118684	1.04675	0.948383	-0.290728	0.644063	10.8359	0.523765
PL6384	CLINO-1243.08	08/11/22	3.83194	0.0399573	0.00275078	2.81051	0.0791855	0.00545136	21.3362	0.0399573	0.00275078	19.8982	0.0791855	0.00545136	41.6651	0.136746	0.0091164	39.3748	0.366243	0.0244162	26.1025	12.4394	0.829293	-0.328963	0.136545	0.00940013	-0.750879	0.336976	0.0231984	-33.0811	10.1111	0.696077	-0.000475314	-0.00223015	-0.000477014	-0.00106082	-0.882327	-0.0387489	-0.118684	1.04675	0.948383	-0.284764	0.650306	9.02962	0.528778
PL6357_20V	CLINO-1783.25	08/02/22	2.8527	0.0681379	0.00554499	2.30182	0.134281	0.0109277	20.3873	0.0681379	0.00554499	19.3833	0.134281	0.0109277	40.1853	0.20596	0.0168165	38.9116	0.438999	0.0358441	55.1227	14.1273	1.15349	-0.298946	0.205272	0.0167048	-0.221906	0.437533	0.035606	-5.56492	14.0801	1.14583	-0.00266266	0.0121999	-0.0255462	-0.00533633	-0.8311	-0.0226625	0.562675	0.592374	0.64307	-0.0845038	0.593012	27.0373	0.708216
PL6358	CLINO-1796.8	08/03/22	3.07117	0.0118559	0.000788642	3.51155	0.0346658	0.00230593	20.6373	0.0118559	0.000788642	20.6033	0.0346658	0.00230593	41.6101	0.145925	0.0097283	41.6088	0.533464	0.0355643	66.9031	20.1399	1.34266	-0.358709	0.1456	0.00968516	-0.0211444	0.532277	0.0354065	2.91553	20.0951	1.3367	-0.00275462	0.0126664	-0.026441	-0.00550972	-0.831107	-0.0224749	0.586217	0.579112	0.637204	-0.129449	0.562238	38.2541	0.667667
PL6352	CLINO-1885.42	08/01/22	2.60802	0.0311292	0.00241609	1.8681	0.0550629	0.00427371	20.1395	0.0311292	0.00241609	18.9456	0.0550629	0.00427371	39.4322	0.161898	0.0126038	37.9178	0.487766	0.0379725	52.134	15.3546	1.19535	-0.350396	0.161407	0.0125276	-0.319901	0.486285	0.0377431	-7.2875	15.308	1.18813	-0.0025707	0.0117333	-0.0246514	-0.00516295	-0.831093	-0.0228501	0.539133	0.606047	0.649189	-0.146809	0.560216	39.0361	0.652005
PL6359	CLINO-1872	08/03/22	2.8843	0.0236216	0.00183339	2.27552	0.0434853	0.00337511	20.4165	0.0236216	0.00183339	19.3569	0.0434853	0.00337511	40.1582	0.138122	0.0107528	38.7164	0.500834	0.0389899	44.3409	17.5797	1.36858	-0.32893	0.137703	0.0106878	-0.3579	0.499314	0.0387543	-15.7064	17.5264	1.36031	-0.00275462	0.0126664	-0.026441	-0.00550972	-0.831107	-0.0224749	0.586217	0.579112	0.637204	-0.10767	0.574851	33.5068	0.687316
PL6348	CLINO-1897.08	07/31/22	2.59843	0.0506859	0.00393399	1.99279	0.0989668	0.00768131	20.1348	0.0506859	0.00393399	19.0713	0.0989668	0.00768131	39.5898	0.161361	0.0125619	38.1727	0.38352	0.029857	50.4703	10.7469	0.836648	-0.315198	0.160871	0.012486	-0.321048	0.382356	0.0296766	-9.0925	10.7143	0.831593	-0.00247875	0.0112667	-0.0237566	-0.00498956	-0.831086	-0.0230377	0.515591	0.620139	0.655571	-0.117662	0.582605	30.694	0.678301
P4999	CLINO-1927.62	09/14/21	2.30587	0.00797501	0.000836008	0.340199	0.0135072	0.00141594	19.7988	0.00797501	0.000836008	17.4048	0.0135072	0.00141594	37.5306	0.115524	0.0121773	34.4814	0.488668	0.0515101	27.9979	9.79275	1.03225	-0.349101	0.114881	0.0120428	-0.609476	0.485946	0.0509409	-26.8254	9.73819	1.02084	-0.00210265	-0.00196442	-0.00181621	-0.00196109	-0.87513	-0.010846	-0.130415	1.04161	0.938486	-0.2755	0.651523	8.68147	0.637615
PL6354	CLINO-1927.62	08/02/22	2.76808	0.0111464	0.000767352	1.75299	0.0339938	0.00234023	20.2877	0.0111464	0.000767352	18.8299	0.0339938	0.00234023	39.4455	0.15205	0.0104925	37.8075	0.531353	0.0366668	47.3894	16.5529	1.14226	-0.375785	0.151688	0.0104426	-0.199141	0.530086	0.0364926	-11.6967	16.5135	1.13683	-0.00266266	0.0121999	-0.0255462	-0.00533633	-0.8311	-0.0226625	0.562675	0.592374	0.64307	-0.16529	0.545156	45.0498	0.635332
PL6355	CLINO-1956.16	08/02/22	3.17991	0.0611482	0.00497617	2.44353	0.118673	0.00965744	20.7034	0.0611482	0.00497617	19.5269	0.118673	0.00965744	40.6404	0.192712	0.0157349	39.0113	0.366381	0.0299149	42.0425	9.8786	0.806584	-0.319524	0.192068	0.0156303	-0.407504	0.365158	0.0297161	-18.4885	9.84562	0.801225	-0.00266266	0.0121999	-0.0255462	-0.00533633	-0.8311	-0.0226625	0.562675	0.592374	0.64307	-0.102653	0.582261	30.8171	0.691842
PL6417	CLINO-1956.16	08/21/22	3.69893	0.0137902	0.000949357	3.88096	0.0330787	0.00227723	21.2471	0.0137902	0.000949357	20.977	0.0330787	0.00227723	42.6652	0.108346	0.00747659	41.7862	0.388437	0.0268047	34.3167	8.01828	0.553314	-0.322459	0.108088	0.00744107	-0.582933	0.387511	0.0266773	-29.034	7.99917	0.550685	-6.82437e-05	-0.00439406	-0.000507792	-0.0016567	-0.882339	-0.0910399	-0.0743047	1.0458	0.950814	-0.251776	0.687508	-1.0636	0.556509
PL6344	CLINO-1977.42	07/30/22	2.61274	0.0648293	0.00527573	1.6903	0.124702	0.0101481	20.1378	0.0648293	0.00527573	18.7664	0.124702	0.0101481	39.2959	0.198503	0.0162077	37.7242	0.396426	0.0323681	55.6534	13.2299	1.08022	-0.30689	0.197841	0.0161	-0.154741	0.395103	0.032153	-3.62075	13.1857	1.07304	-0.00238679	0.0108001	-0.0228619	-0.00481617	-0.831078	-0.0232253	0.49205	0.63466	0.662228	-0.117634	0.587571	28.9326	0.678326
PL6339	CLINO-2026.58	07/28/22	3.05014	0.0534879	0.00397573	1.74027	0.103385	0.00768454	20.5554	0.0534879	0.00397573	18.8177	0.103385	0.00768454	39.7664	0.167593	0.0124916	37.7785	0.358848	0.026747	47.3179	11.4462	0.853147	-0.326027	0.167126	0.0124224	-0.20307	0.35785	0.0265988	-12.017	11.4143	0.848421	-0.00220287	0.00986699	-0.0210723	-0.0044694	-0.831064	-0.0236005	0.444966	0.665008	0.67641	-0.148295	0.577792	32.4306	0.650664
PL6342	CLINO-2026.58	07/29/22	3.07047	0.0791838	0.00614586	1.77937	0.153484	0.0119127	20.5761	0.0791838	0.00614586	18.8572	0.153484	0.0119127	39.8341	0.234713	0.0182723	37.8854	0.452885	0.0352571	59.7403	16.9844	1.32223	-0.319924	0.234	0.0181619	-0.177505	0.451511	0.035044	-0.396179	16.9328	1.31424	-0.00229483	0.0103336	-0.0219671	-0.00464278	-0.831071	-0.0234129	0.468508	0.649614	0.669171	-0.134983	0.581484	31.0957	0.662675
PL6419	CLINO-2026.58	08/21/22	3.12515	0.0172526	0.0014794	1.98754	0.0410044	0.0035161	20.6354	0.0172526	0.0014794	19.0671	0.0410044	0.0035161	40.1001	0.107954	0.00929119	38.035	0.378828	0.0326043	39.0528	7.16058	0.616285	-0.326573	0.107553	0.00922262	-0.445402	0.377422	0.0323637	-20.3671	7.13401	0.611736	-6.82437e-05	-0.00439406	-0.000507792	-0.0016567	-0.882339	-0.0910399	-0.0743047	1.0458	0.950814	-0.26014	0.678761	1.21196	0.549478
PL6343	CLINO-2078	07/30/22	2.88959	0.0610757	0.0040627	1.47137	0.109109	0.00725784	20.3934	0.0610757	0.0040627	18.5463	0.109109	0.00725784	39.3231	0.173394	0.0115596	37.2175	0.400512	0.0267008	48.549	12.5036	0.833572	-0.326687	0.173008	0.0115083	-0.210944	0.399621	0.0265824	-10.1702	12.4758	0.829875	-0.00238679	0.0108001	-0.0228619	-0.00481617	-0.831078	-0.0232253	0.49205	0.63466	0.662228	-0.1373	0.575089	33.4191	0.660584
PL6399	CLINO-2078	08/16/22	2.88377	0.0302647	0.00224956	1.61757	0.066077	0.00491147	20.393	0.0302647	0.00224956	18.6937	0.066077	0.00491147	39.4644	0.138743	0.0103413	37.4222	0.351001	0.0261621	47.8603	13.2229	0.985576	-0.332503	0.138357	0.010284	-0.302945	0.350025	0.0260172	-11.1011	13.1861	0.980116	-0.000271779	-0.0033121	-0.000492403	-0.00135876	-0.882333	-0.0648944	-0.0964943	1.04914	0.950594	-0.27888	0.658011	6.84694	0.533724
PL6351	CLINO-2102.08	08/01/22	2.80207	0.01932	0.00149952	1.16888	0.0538953	0.00418309	20.2996	0.01932	0.00149952	18.2412	0.0538953	0.00418309	38.9193	0.151825	0.0104769	36.6281	0.516307	0.0356286	57.2363	18.071	1.24702	-0.331312	0.137738	0.0106905	-0.148265	0.524755	0.0407289	-2.75288	17.7982	1.38141	-0.0025707	0.0117333	-0.0246514	-0.00516295	-0.831093	-0.0228501	0.539133	0.606047	0.649189	-0.130374	0.570176	35.2409	0.666833
PL6398	CLINO-2102.08	08/16/22	2.9209	0.0340954	0.00226799	1.39548	0.048852	0.00324959	20.4205	0.0340954	0.00226799	18.4699	0.048852	0.00324959	39.2739	0.115575	0.00770501	36.704	0.325108	0.0216739	28.7638	10.2149	0.680995	-0.327665	0.115318	0.00767084	-0.555957	0.324385	0.0215777	-28.7318	10.1922	0.677976	-0.000271779	-0.0033121	-0.000492403	-0.00135876	-0.882333	-0.0648944	-0.0964943	1.04914	0.950594	-0.274301	0.662816	5.51131	0.537574
PL6410	CLINO-2128.17	08/19/22	2.89377	0.0334866	0.0027251	1.83027	0.0726435	0.00591164	20.4099	0.0334866	0.0027251	18.9081	0.0726435	0.00591164	39.7031	0.177748	0.0145131	38.6024	0.755512	0.0616873	77.4159	27.701	2.26178	-0.326963	0.177155	0.0144166	0.413147	0.752989	0.0612774	16.353	27.6085	2.24675	-0.000149658	-0.00396127	-0.000501636	-0.00153752	-0.882337	-0.0805817	-0.0831805	1.04783	0.950969	-0.265919	0.672333	2.92115	0.54462
PL6420	CLINO-2128.15	08/22/22	2.87863	0.0141301	0.000972758	1.7826	0.035587	0.00244991	20.3938	0.0141301	0.000972758	18.86	0.035587	0.00244991	39.6276	0.13499	0.00931519	37.7825	0.603343	0.0416346	44.0585	9.17249	0.632962	-0.336995	0.134668	0.00927094	-0.282308	0.601905	0.0414368	-15.006	9.15062	0.629955	-2.75367e-05	-0.00461045	-0.00051087	-0.00171628	-0.882341	-0.096269	-0.0698668	1.04444	0.950615	-0.268983	0.669679	3.63607	0.542044
PL6347	CLINO-2177	07/31/22	2.60156	0.0597915	0.00397727	1.83697	0.115537	0.00768542	20.1323	0.0597915	0.00397727	18.9142	0.115537	0.00768542	39.4252	0.183135	0.012209	38.0901	0.39385	0.0262567	56.2389	14.1728	0.944853	-0.319587	0.182728	0.0121549	-0.0923678	0.392974	0.0261402	-3.34666	14.1413	0.940662	-0.00247875	0.0112667	-0.0237566	-0.00498956	-0.831086	-0.0230377	0.515591	0.620139	0.655571	-0.122873	0.579373	31.8569	0.6736
PL6397	CLINO-2177	08/15/22	2.62922	0.0291675	0.0019402	1.8721	0.0651583	0.00433427	20.1598	0.0291675	0.0019402	18.9497	0.0651583	0.00433427	39.4872	0.140779	0.00938528	37.866	0.33042	0.022028	44.3333	9.94233	0.662822	-0.321939	0.140466	0.00934366	-0.377852	0.329685	0.0219303	-14.6763	9.92021	0.659883	-0.000312486	-0.00309571	-0.000489325	-0.00129917	-0.882332	-0.0596653	-0.100932	1.04911	0.950309	-0.270639	0.666379	4.53303	0.540653
P5192	SS-182.6	10/28/21	2.17299	0.0082412	0.000863913	10.1527	0.0131932	0.00138302	19.7376	0.0082412	0.000863913	19.282	0.0131932	0.00138302	39.2979	0.11636	0.0122654	37.9607	0.573906	0.060495	25.3781	9.03747	0.952633	-0.397523	0.115711	0.0121299	-0.938292	0.570709	0.0598265	-32.7535	8.98712	0.942106	-0.00203984	-0.00188108	-0.00194302	-0.00195465	-0.887498	0.00506178	-0.129079	1.01339	0.927278	-0.320709	0.602275	23.8913	0.581417
PL6297	SS-182.6	07/16/22	2.43636	0.0962365	0.0074694	10.7426	0.290822	0.0225722	20.0086	0.0962365	0.0074694	19.8772	0.290822	0.0225722	40.2636	0.617061	0.0480382	39.8923	0.967831	0.0753455	40.9672	13.4873	1.04998	-0.316935	0.615189	0.0477479	-0.247078	0.964893	0.0748902	-19.4517	13.4464	1.04364	-0.00109939	0.0042681	-0.010335	-0.00238875	-0.830977	-0.0258518	0.162465	0.882335	0.789813	-0.220756	0.595033	26.3426	0.640957
PL6307	SS-182.6	07/19/22	2.44771	0.0487372	0.00324195	10.8137	0.0995802	0.00662398	20.0219	0.0487372	0.00324195	19.9488	0.0995802	0.00662398	40.348	0.180773	0.0120515	39.9497	0.575746	0.038383	47.1787	17.2728	1.15152	-0.318239	0.180371	0.0119981	-0.33235	0.574465	0.0382128	-13.7505	17.2344	1.14641	-0.00137526	0.00566782	-0.0130193	-0.00290891	-0.830999	-0.025289	0.23309	0.823028	0.756562	-0.20087	0.591241	27.6504	0.620894
PL7083	SS182.6	04/30/23	2.51478	0.00620896	0.000505278	10.8567	0.0110248	0.000897186	20.0872	0.00620896	0.000505278	19.9923	0.0110248	0.000897186	40.4339	0.0836521	0.00683017	39.8181	0.390847	0.0319125	36.5034	11.611	0.948032	-0.343635	0.0833728	0.00678478	-0.544023	0.389542	0.0317005	-23.9531	11.5722	0.941732	-0.000790793	-0.000775148	-0.000857567	-0.000807836	-0.843739	-0.00775821	-0.140488	1.08544	0.944506	-0.310971	0.606965	22.3358	0.638228
PL7084	SS182.6	04/30/23	2.51968	0.00630886	0.000661348	10.8634	0.00964847	0.00101143	20.0921	0.00630886	0.000661348	19.9991	0.00964847	0.00101143	40.4728	0.0871552	0.00918696	40.1321	0.499089	0.0526086	48.8623	15.2762	1.61025	-0.3178	0.0866696	0.00908544	-0.255636	0.496308	0.0520272	-12.3331	15.1911	1.59246	-0.000790793	-0.000775148	-0.000857567	-0.000807836	-0.843739	-0.00775821	-0.140488	1.08544	0.944506	-0.285105	0.635041	13.5086	0.664465
PL7103	SS182.6	05/04/23	2.50416	0.00986669	0.000958338	10.7122	0.0122544	0.00119025	20.072	0.00986669	0.000958338	19.8466	0.0122544	0.00119025	40.272	0.0919477	0.00897317	39.2212	0.389027	0.0379652	25.3927	7.20217	0.70286	-0.343474	0.0915088	0.00888812	-0.832423	0.38717	0.0376053	-34.1294	7.16779	0.696197	-0.000790793	-0.000870318	-0.000857567	-0.000839559	-0.843739	-0.00443694	-0.140488	1.08246	0.942323	-0.309663	0.607125	22.2834	0.639555
PL7104	SS182.6	05/05/23	2.50684	0.00844553	0.000627752	10.7173	0.0126818	0.000942627	20.0748	0.00844553	0.000627752	19.8518	0.0126818	0.000942627	40.2732	0.0907704	0.00676562	39.36	0.371047	0.0276562	29.732	9.85255	0.734366	-0.35009	0.0905179	0.00672814	-0.709069	0.370015	0.027503	-30.0544	9.82514	0.730297	-0.000790793	-0.000865992	-0.000857567	-0.000838117	-0.843739	-0.00458791	-0.140488	1.0826	0.942422	-0.316337	0.599957	24.6695	0.632786
P5627	SS186.6	02/13/22	2.48565	0.00880794	0.000855503	11.3	0.0155011	0.0015056	20.075	0.00880794	0.000855503	20.4392	0.0155011	0.0015056	40.9007	0.142505	0.0139071	41.3486	0.64823	0.0632607	63.5265	26.7198	2.60758	-0.313376	0.141825	0.0137752	0.0506544	0.645135	0.0626611	0.645055	26.5922	2.58287	0.00042884	-0.00173069	0.000280173	-0.00034056	-0.846118	-0.030948	-0.111858	1.08555	0.943434	-0.299447	0.61837	18.653	0.615322
PL5652	SS-186.6	02/19/22	2.43851	0.0253464	0.00168602	11.2347	0.0480501	0.00319624	20.0279	0.0253464	0.00168602	20.3732	0.0480501	0.00319624	40.7827	0.100136	0.00667574	40.8823	0.381618	0.0254412	47.3489	11.5881	0.772538	-0.315498	0.0999134	0.00664614	-0.267966	0.380769	0.0253284	-14.4024	11.5623	0.769113	0.00079137	-7.09624e-05	0.000581571	0.000433993	-0.846118	0.00947459	-0.112014	1.05374	0.918805	-0.333198	0.567701	36.171	0.581828
PL7089	SS186.6	05/01/23	2.45966	0.00661655	0.000758971	10.9067	0.00964255	0.00110608	20.0365	0.00661655	0.000758971	20.0426	0.00964255	0.00110608	40.4614	0.0796821	0.00920089	40.2903	0.522135	0.060291	49.5653	14.9171	1.72248	-0.314402	0.0791491	0.00907902	-0.188808	0.518643	0.0594924	-11.6965	14.8173	1.69966	-0.000790793	-0.000770822	-0.000857567	-0.000806394	-0.843739	-0.00790918	-0.140488	1.08557	0.944605	-0.281774	0.638718	12.4103	0.667843
PL5657	SS-186.6	02/20/22	2.40829	0.0248989	0.00193253	11.0839	0.0482775	0.00374706	19.9939	0.0248989	0.00193253	20.2211	0.0482775	0.00374706	40.5877	0.0985969	0.00767576	40.4947	0.344358	0.0268083	43.2348	11.6825	0.909479	-0.322022	0.0982977	0.00762938	-0.342329	0.343313	0.0266463	-17.9515	11.647	0.903984	0.000851792	-4.63971e-05	0.000631804	0.000479066	-0.846118	0.0099119	-0.112041	1.0534	0.918553	-0.341466	0.558853	39.5663	0.572115
PL5658	SS-186.6	02/20/22	2.45855	0.0292161	0.00226761	11.2161	0.0549189	0.00426253	20.0463	0.0292161	0.00226761	20.3546	0.0549189	0.00426253	40.7717	0.106141	0.00826306	40.8035	0.398546	0.0310268	45.47	11.2575	0.876395	-0.32677	0.105819	0.00821313	-0.307153	0.397337	0.0308393	-16.1542	11.2233	0.871099	0.000851792	-4.63971e-05	0.000631804	0.000479066	-0.846118	0.0099119	-0.112041	1.0534	0.918553	-0.346302	0.553758	41.5726	0.566895
PL5895	SS-186.6	04/15/22	2.34874	0.0199193	0.00132501	11.1824	0.0343937	0.00228784	19.9407	0.0199193	0.00132501	20.3203	0.0343937	0.00228784	40.6842	0.099844	0.00665626	42.28	0.765634	0.0510422	279.365	81.9348	5.46232	-0.271064	0.0996218	0.00662675	1.17824	0.76393	0.0508159	204.167	81.7525	5.43809	0.00108731	0.000693414	0.000259016	0.000679913	-0.871038	0.00522921	-0.11337	1.02611	0.920506	-0.298726	0.613981	20.0537	0.579441
P5053	SS-186.6	09/24/21	2.30805	0.00965064	0.00101166	10.6806	0.01272	0.00133342	19.8845	0.00965064	0.00101166	19.8143	0.01272	0.00133342	39.9986	0.122703	0.0129341	39.1467	0.470073	0.0495501	25.8222	7.9015	0.832891	-0.385513	0.12202	0.0127911	-0.840731	0.467455	0.0490026	-33.4753	7.85748	0.823688	-0.00208612	-0.00194127	-0.00185048	-0.00195929	-0.87513	-0.00642714	-0.130054	1.03797	0.935599	-0.307144	0.616793	19.1539	0.589537
P5140	SS-187.3	10/17/21	2.27041	0.00940455	0.00107878	10.6315	0.0166205	0.0019065	19.847	0.00940455	0.00107878	19.7648	0.0166205	0.0019065	39.9158	0.110235	0.0127289	37.7691	0.562154	0.0649119	1.47714	6.992	0.807366	-0.379415	0.109498	0.0125603	-2.06837	0.558393	0.0640521	-56.286	6.94523	0.796672	-0.00212248	-0.00188803	-0.00192931	-0.00197994	-0.87513	0.00373613	-0.129224	1.02957	0.928995	-0.300384	0.619728	18.2235	0.634592
PL5879	SS-187.3	04/11/22	2.46834	0.0137667	0.000915745	11.3196	0.024229	0.00161169	20.0592	0.0137667	0.000915745	20.4589	0.024229	0.00161169	40.9246	0.0934778	0.00623185	41.9552	0.57195	0.03813	206.764	46.9626	3.13084	-0.293444	0.0932698	0.00620422	0.594524	0.570678	0.0379609	135.389	46.8582	3.11696	0.000917143	-0.000194719	0.00037875	0.000367058	-0.87104	0.00699216	-0.0894759	1.0128	0.907502	-0.308466	0.595087	26.3238	0.580833
PL5883	SS-187.3	04/12/22	2.39581	0.0162971	0.00108407	11.3745	0.0231376	0.00153909	19.9921	0.0162971	0.00108407	20.514	0.0231376	0.00153909	40.9096	0.108263	0.00721752	42.1417	0.577407	0.0384938	195.575	49.1293	3.27528	-0.293146	0.108022	0.00718552	0.665427	0.576122	0.0383231	124.821	49.02	3.26076	0.000959685	-0.000195184	0.000400508	0.000388337	-0.87104	0.00684421	-0.0885118	1.01239	0.907097	-0.309033	0.594235	26.6164	0.568916
PL6013	SS-187.3	05/14/22	2.51012	0.0137641	0.000947557	11.2049	0.0254356	0.00175106	20.0949	0.0137641	0.000947557	20.3433	0.0254356	0.00175106	40.8539	0.0871117	0.00580744	41.3134	0.407743	0.0271829	126.818	31.5954	2.10636	-0.284281	0.0876676	0.00603529	0.209717	0.408317	0.0281097	62.0361	31.3235	2.1564	0.00156747	0.000679929	0.000890007	0.0010458	-0.860728	0.000938707	-0.0854128	1.02744	0.909304	-0.327006	0.573326	34.0692	0.585898
PL7098	SS187.3	05/03/23	2.532	0.00571069	0.000655061	11.5886	0.0109137	0.00125188	20.1291	0.00571069	0.000655061	20.7301	0.0109137	0.00125188	41.2031	0.0893235	0.0103142	41.33	0.287102	0.0331516	34.732	8.06496	0.931261	-0.357924	0.088726	0.0101776	-0.53729	0.285181	0.0327125	-27.0473	8.01101	0.918926	-0.000790793	-0.00087897	-0.000857567	-0.000842443	-0.843739	-0.00413501	-0.140488	1.08219	0.942125	-0.323212	0.592347	27.267	0.625811
PL7099	SS187.3	05/04/23	2.53313	0.00646994	0.000526516	11.5929	0.0103294	0.000840597	20.1303	0.00646994	0.000526516	20.7345	0.0103294	0.000840597	41.1914	0.0877635	0.00716586	41.395	0.41295	0.0337172	36.4119	10.0471	0.820344	-0.374609	0.0874704	0.00711824	-0.483477	0.411571	0.0334932	-25.4772	10.0136	0.814893	-0.000790793	-0.000874644	-0.000857567	-0.000841001	-0.843739	-0.00428597	-0.140488	1.08233	0.942224	-0.339967	0.574268	33.7213	0.608816
PL7105	SS187.3	05/05/23	2.49675	0.00685655	0.000665967	11.4236	0.0107155	0.00104078	20.0898	0.00685655	0.000665967	20.5637	0.0107155	0.00104078	41.0044	0.0940593	0.00917925	40.8507	0.368378	0.03595	32.8628	7.85277	0.766352	-0.34875	0.0936103	0.00909224	-0.671536	0.36662	0.0356093	-28.4539	7.81529	0.759088	-0.000790793	-0.000865992	-0.000857567	-0.000838117	-0.843739	-0.00458791	-0.140488	1.0826	0.942422	-0.314384	0.602071	23.9596	0.634767
PL7106	SS187.3	05/05/23	2.50013	0.0087969	0.000922166	11.43	0.0132891	0.00139308	20.0933	0.0087969	0.000922166	20.5702	0.0132891	0.00139308	41.0136	0.0860383	0.00906923	41.069	0.445368	0.0469459	40.5892	12.0789	1.27322	-0.349721	0.0855589	0.00896901	-0.474704	0.442887	0.0464271	-21.2019	12.0116	1.25916	-0.000790793	-0.000861666	-0.000857567	-0.000836675	-0.843739	-0.00473887	-0.140488	1.08273	0.942521	-0.315406	0.601021	24.3117	0.633729
P5050	SS-192.3	09/23/21	1.81085	0.00707026	0.000741164	10.653	0.0138654	0.00145349	19.4108	0.00707026	0.000741164	19.7855	0.0138654	0.00145349	39.494	0.127811	0.0134725	38.4777	0.506161	0.0533541	11.6044	6.74545	0.711033	-0.363701	0.127099	0.0133236	-1.42758	0.503341	0.0527645	-46.3462	6.70787	0.703176	-0.00208777	-0.00194359	-0.00184706	-0.00195947	-0.87513	-0.00686903	-0.13009	1.03833	0.935887	-0.286314	0.638598	12.4458	0.610719
P5066	SS-192.3	09/26/21	2.03342	0.00892019	0.00093509	11.0077	0.0123976	0.00129962	19.6348	0.00892019	0.00093509	20.1435	0.0123976	0.00129962	40.1122	0.132411	0.0139574	39.4661	0.478682	0.0504575	15.2193	8.35304	0.880488	-0.340918	0.131673	0.0138031	-1.17856	0.476015	0.0498999	-43.8222	8.30651	0.870758	-0.00208281	-0.00193664	-0.00185734	-0.00195893	-0.87513	-0.00554338	-0.129982	1.03724	0.935023	-0.262341	0.662912	5.48456	0.635096
PL6301	SS-192.3	07/17/22	2.19657	0.0526952	0.00511821	11.8916	0.1	0.0097129	19.8208	0.0526952	0.00511821	21.0349	0.1	0.0097129	41.2129	0.167277	0.0163246	42.1585	0.332	0.0323999	49.4003	11.076	1.0809	-0.330117	0.166479	0.0161699	-0.339186	0.330415	0.0320928	-13.5157	11.0231	1.07066	-0.00119135	0.00473467	-0.0112297	-0.00256214	-0.830985	-0.0256642	0.186007	0.86231	0.778359	-0.224524	0.58475	29.9291	0.637403
PL6313	SS-192.3	07/21/22	2.07943	0.0687554	0.00457354	11.6701	0.134501	0.00894685	19.7016	0.0687554	0.00457354	20.8114	0.134501	0.00894685	40.8717	0.220706	0.0147137	41.9738	0.406985	0.0271323	62.8425	17.9713	1.19809	-0.322102	0.220215	0.0146485	-0.0785834	0.40608	0.027012	-0.325031	17.9313	1.19277	-0.00155918	0.00660097	-0.0148089	-0.00325569	-0.831013	-0.0249138	0.280174	0.785049	0.736257	-0.189037	0.587854	28.833	0.631415
PL6412	SS-192.3	08/19/22	2.18647	0.0171354	0.00127367	11.8778	0.0407894	0.00303185	19.8107	0.0171354	0.00127367	21.0209	0.0407894	0.00303185	41.2024	0.116419	0.00867733	41.5368	0.368831	0.027491	20.6079	11.2858	0.841194	-0.316595	0.116095	0.00862925	-0.908238	0.367805	0.0273387	-40.546	11.2544	0.836533	-0.000149658	-0.00396127	-0.000501636	-0.00153752	-0.882337	-0.0805817	-0.0831805	1.04783	0.950969	-0.253246	0.685612	-0.575094	0.555274
PL7092	SS-192.3	05/02/23	1.74151	0.00943199	0.000916116	11.2882	0.0133024	0.00129204	19.367	0.00943199	0.000916116	20.4256	0.0133024	0.00129204	40.135	0.0863836	0.00843017	41.1122	0.550871	0.0537595	46.3473	15.3737	1.50032	-0.319902	0.0859712	0.00835026	-0.149906	0.548241	0.0532499	-14.7641	15.3004	1.4861	-0.000790793	-0.000766496	-0.000857567	-0.000804952	-0.843739	-0.00806014	-0.140488	1.08571	0.944704	-0.287595	0.632459	14.2876	0.661939
PL7093	SS-192.3	05/02/23	1.74637	0.00946087	0.000991769	11.3007	0.0124271	0.00130272	19.3721	0.00946087	0.000991769	20.4382	0.0124271	0.00130272	40.1575	0.0906266	0.00955288	41.7627	0.94343	0.0994462	70.3144	28.0699	2.95883	-0.315572	0.0901217	0.00944732	0.45011	0.938174	0.0983473	7.77347	27.9135	2.92613	-0.000790793	-0.000887621	-0.000857567	-0.000845327	-0.843739	-0.00383307	-0.140488	1.08192	0.941927	-0.281626	0.63723	12.8532	0.667994
PL7102	SS192.3	05/04/23	2.12102	0.00910624	0.000780854	11.6569	0.0127731	0.00109529	19.7407	0.00910624	0.000780854	20.7981	0.0127731	0.00109529	40.8704	0.0851338	0.00732715	41.468	0.426382	0.0366971	36.8471	10.5083	0.904414	-0.350101	0.0848179	0.00727307	-0.537944	0.4248	0.0364263	-24.7904	10.4694	0.897739	-0.000790793	-0.000870318	-0.000857567	-0.000839559	-0.843739	-0.00443694	-0.140488	1.08246	0.942323	-0.315788	0.600494	24.4886	0.633342
PL6413	SS-193.5	08/20/22	2.49058	0.0218384	0.00145267	11.8102	0.0401488	0.00267066	20.0975	0.0218384	0.00145267	20.9535	0.0401488	0.00267066	41.4097	0.106608	0.00710721	41.9745	0.3351	0.02234	47.6159	10.4849	0.698996	-0.342597	0.106371	0.00707569	-0.356215	0.334355	0.0222409	-15.3235	10.4616	0.695896	-0.000108951	-0.00417767	-0.000504714	-0.00159711	-0.882338	-0.0858108	-0.0787426	1.04693	0.950932	-0.276462	0.661497	5.87594	0.535758
P5046	SS-193.5	09/23/21	2.14401	0.00844781	0.000687473	10.3488	0.0143599	0.00116859	19.7169	0.00844781	0.000687473	19.4795	0.0143599	0.00116859	39.5087	0.130201	0.0106309	37.9621	0.544107	0.0444262	16.0546	6.90224	0.563566	-0.364359	0.129767	0.0105603	-1.32416	0.542291	0.044131	-41.8926	6.87919	0.559821	-0.00208777	-0.00194359	-0.00184706	-0.00195947	-0.87513	-0.00686903	-0.13009	1.03833	0.935887	-0.286943	0.637945	12.6402	0.610079
PL6293	SS-193.5	07/15/22	2.40951	0.038388	0.00402415	11.5868	0.073241	0.00767774	20.0126	0.038388	0.00402415	20.7281	0.073241	0.00767774	41.1058	0.131799	0.0138928	41.3038	0.325633	0.0343247	41.4703	8.81495	0.929178	-0.331571	0.131065	0.0137393	-0.558365	0.323818	0.0339454	-20.5882	8.76585	0.91891	-0.00100743	0.00380152	-0.00944019	-0.00221537	-0.83097	-0.0260394	0.138923	0.902545	0.801627	-0.240507	0.584559	29.9971	0.622326
PL6298	SS-193.5	07/17/22	2.46495	0.052985	0.00352451	11.6981	0.101334	0.00674063	20.0692	0.052985	0.00352451	20.8404	0.101334	0.00674063	41.2634	0.167156	0.0111437	41.6453	0.467025	0.031135	46.696	10.1047	0.673646	-0.34556	0.166784	0.0110943	-0.450598	0.465986	0.0309969	-15.9449	10.0822	0.670659	-0.00119135	0.00473467	-0.0112297	-0.00256214	-0.830985	-0.0256642	0.186007	0.86231	0.778359	-0.239838	0.571545	34.7301	0.622958
PL6310	SS-193.5	07/20/22	2.54068	0.110774	0.00762599	11.881	0.110491	0.00760652	20.1476	0.110774	0.00762599	21.0249	0.110491	0.00760652	41.5738	0.184201	0.0122801	42.0082	0.366658	0.0244439	41.7768	8.97478	0.598318	-0.321813	0.175144	0.0120574	-0.484493	0.364021	0.0250603	-20.6846	9.06789	0.62426	-0.00146722	0.00613439	-0.0139141	-0.0030823	-0.831006	-0.0251014	0.256632	0.803858	0.746223	-0.19367	0.590541	27.8937	0.627296
PL7096	SS193.5	05/03/23	2.44841	0.00577265	0.000605139	11.624	0.0112415	0.00117843	20.0509	0.00577265	0.000605139	20.7656	0.0112415	0.00117843	41.2132	0.077724	0.00819283	41.0403	0.351899	0.0370934	27.1144	6.49706	0.684851	-0.303276	0.077291	0.0081023	-0.884884	0.349939	0.0366836	-34.1972	6.46087	0.677283	-0.000790793	-0.000883295	-0.000857567	-0.000843885	-0.843739	-0.00398404	-0.140488	1.08206	0.942026	-0.268497	0.651497	8.68882	0.681311
PL7097	SS193.5	05/03/23	2.44872	0.00697334	0.000677311	11.6252	0.00984073	0.000955816	20.0512	0.00697334	0.000677311	20.7669	0.00984073	0.000955816	41.202	0.0823426	0.00803581	41.2312	0.366758	0.0357919	32.6758	7.90613	0.77156	-0.315613	0.0819495	0.00795964	-0.704203	0.365007	0.0354526	-28.9705	7.8684	0.764246	-0.000790793	-0.00087897	-0.000857567	-0.000842443	-0.843739	-0.00413501	-0.140488	1.08219	0.942125	-0.280903	0.638134	12.5838	0.668728
P5045	SS-198.5	09/23/21	1.86725	0.00785546	0.000823476	10.7661	0.015049	0.00157757	19.4683	0.00785546	0.000823476	19.8996	0.015049	0.00157757	39.6365	0.126233	0.0133061	39.1931	0.457799	0.0482563	21.4385	6.02942	0.635557	-0.394906	0.125529	0.013159	-0.963272	0.455249	0.047723	-37.3451	5.99583	0.628534	-0.00208777	-0.00194359	-0.00184706	-0.00195947	-0.87513	-0.00686903	-0.13009	1.03833	0.935887	-0.317239	0.606487	22.4932	0.579272
PL6302	SS-198.5	07/18/22	2.06794	0.0599064	0.00398491	11.8083	0.116987	0.00778183	19.6956	0.0599064	0.00398491	20.9507	0.116987	0.00778183	41	0.188485	0.0125657	42.1556	0.567757	0.0378505	55.5699	14.766	0.9844	-0.32689	0.188066	0.01251	-0.176996	0.566494	0.0376826	-7.42529	14.7332	0.980035	-0.00128331	0.00520125	-0.0121245	-0.00273553	-0.830992	-0.0254766	0.209549	0.842525	0.767274	-0.214733	0.586356	29.3605	0.608567
PL6315	SS-198.5	07/21/22	2.06823	0.0573559	0.00445168	11.8121	0.11155	0.00865795	19.696	0.0573559	0.00445168	20.9545	0.11155	0.00865795	41.0167	0.168513	0.0131187	41.8688	0.395416	0.0307831	41.0831	8.2461	0.641958	-0.314841	0.168001	0.0130394	-0.459529	0.394216	0.0305971	-21.055	8.22107	0.638079	-0.00155918	0.00660097	-0.0148089	-0.00325569	-0.831013	-0.0249138	0.280174	0.785049	0.736257	-0.181303	0.593925	26.7227	0.638292
PL7094	SS198.5	05/03/23	2.13534	0.00880797	0.000716782	11.7972	0.0104549	0.000850811	19.7592	0.00880797	0.000716782	20.9396	0.0104549	0.000850811	41.04	0.092976	0.00759145	41.71	0.373609	0.030505	35.952	10.2301	0.835285	-0.342205	0.0926655	0.00754101	-0.58288	0.372361	0.0303023	-25.9165	10.1959	0.829734	-0.000790793	-0.000887621	-0.000857567	-0.000845327	-0.843739	-0.00383307	-0.140488	1.08192	0.941927	-0.307513	0.609222	21.596	0.641736
PL7107	SS198.5	05/05/23	2.10249	0.00714611	0.000649646	11.8868	0.0107538	0.000977618	19.7311	0.00714611	0.000649646	21.0298	0.0107538	0.000977618	41.0938	0.0841497	0.00768178	42.0748	0.448221	0.0409168	44.4537	12.7285	1.16195	-0.348912	0.0837983	0.00761803	-0.409522	0.446349	0.0405772	-18.0641	12.6754	1.15231	-0.000790793	-0.000861666	-0.000857567	-0.000836675	-0.843739	-0.00473887	-0.140488	1.08273	0.942521	-0.31453	0.60197	23.9937	0.634618
PL7108	SS198.5	05/05/23	2.10556	0.006452	0.000740095	11.8975	0.0109458	0.00125557	19.7344	0.006452	0.000740095	21.0407	0.0109458	0.00125557	41.1141	0.0847755	0.00978903	42.0856	0.519951	0.0600388	40.4942	12.6101	1.45609	-0.343217	0.0842085	0.00965937	-0.420331	0.516473	0.0592435	-21.8104	12.5257	1.4368	-0.000790793	-0.00085734	-0.000857567	-0.000835233	-0.843739	-0.00488984	-0.140488	1.08287	0.94262	-0.308877	0.608147	21.9478	0.640352
P5051	SS-205	09/24/21	2.09388	0.00765583	0.000802549	11.195	0.0137614	0.00144258	19.6988	0.00765583	0.000802549	20.3325	0.0137614	0.00144258	40.3335	0.122166	0.0128775	39.4395	0.533964	0.0562848	0.634857	8.87516	0.935524	-0.375158	0.121486	0.0127352	-1.57406	0.530989	0.0556628	-57.9645	8.82571	0.925186	-0.00208612	-0.00194127	-0.00185048	-0.00195929	-0.87513	-0.00642714	-0.130054	1.03797	0.935599	-0.296133	0.628223	15.5796	0.600734
P5065	SS-205	09/26/21	2.13304	0.00857082	0.000898466	10.8047	0.0123897	0.00129879	19.7224	0.00857082	0.000898466	19.9391	0.0123897	0.00129879	39.953	0.11698	0.0123307	39.1061	0.486123	0.0512419	17.629	7.4539	0.78571	-0.3857	0.116328	0.0121945	-1.12421	0.483415	0.0506757	-41.263	7.41238	0.777028	-0.00208281	-0.00193664	-0.00185734	-0.00195893	-0.87513	-0.00554338	-0.129982	1.03724	0.935023	-0.307435	0.616139	19.3624	0.589242
PL5648	SS-205	02/18/22	2.31293	0.0345491	0.00229817	11.8779	0.0620766	0.00412928	19.9309	0.0345491	0.00229817	21.0214	0.0620766	0.00412928	41.3486	0.116024	0.00773492	42.2923	0.415635	0.027709	53.8776	17.6241	1.17494	-0.298209	0.115766	0.00770062	-0.184321	0.414711	0.0275861	-9.39503	17.5848	1.16973	0.000534268	-0.000195649	0.000161167	0.000166595	-0.846118	0.00669626	-0.0991165	1.04933	0.913871	-0.305098	0.593723	26.7924	0.619886
P5628_	SS205	02/13/22	2.40461	0.0163299	0.00126744	12.0545	0.0305788	0.00237337	20.0243	0.0163299	0.00126744	21.1996	0.0305788	0.00237337	41.5764	0.0933517	0.00726742	42.4405	0.381268	0.0296817	45.5729	11.3132	0.880735	-0.345439	0.0930684	0.00722351	-0.391125	0.380111	0.0295023	-17.634	11.2789	0.875413	0.00042884	-0.00173069	0.000280173	-0.00034056	-0.846118	-0.030948	-0.111858	1.08555	0.943434	-0.33128	0.583813	30.2624	0.582301
PL5648	SS-205	02/18/22	2.31293	0.0345491	0.00229817	11.8779	0.0620766	0.00412928	19.9309	0.0345491	0.00229817	21.0214	0.0620766	0.00412928	41.3486	0.116024	0.00773492	42.2923	0.415635	0.027709	53.8776	17.6241	1.17494	-0.298209	0.115766	0.00770062	-0.184321	0.414711	0.0275861	-9.39503	17.5848	1.16973	0.000730949	-9.55277e-05	0.000531338	0.00038892	-0.846118	0.00903729	-0.111988	1.05408	0.919057	-0.314291	0.58777	28.8627	0.602247
PL5651	SS-205	02/18/22	2.32009	0.0243885	0.0016223	11.874	0.0415574	0.00276436	19.9376	0.0243885	0.0016223	21.0174	0.0415574	0.00276436	41.3195	0.106426	0.00709508	42.1041	0.351398	0.0234265	46.3541	13.4013	0.893418	-0.329109	0.106189	0.00706362	-0.357141	0.350616	0.0233226	-16.4663	13.3715	0.889456	0.000730949	-9.55277e-05	0.000531338	0.00038892	-0.846118	0.00903729	-0.111988	1.05408	0.919057	-0.345179	0.555211	40.9967	0.568889
PL6012	SS-205	05/13/22	2.36905	0.0177699	0.00172597	11.6707	0.0374256	0.0036351	19.977	0.0177699	0.00172597	20.8126	0.0374256	0.0036351	41.2051	0.0999632	0.00975541	42.4996	0.494429	0.0482514	149.966	40.0222	3.90577	-0.281617	0.0994861	0.00966294	0.423611	0.492069	0.047794	81.3064	39.8312	3.86875	0.00152493	0.000680394	0.000868249	0.00102452	-0.860728	0.00108666	-0.0863768	1.02787	0.909722	-0.323833	0.576862	32.7696	0.589281
PL7090	SS205	05/02/23	2.35858	0.00723733	0.000516952	11.7802	0.0115589	0.000825638	19.9709	0.00723733	0.000516952	20.9229	0.0115589	0.000825638	41.2553	0.0890683	0.00637831	41.7407	0.473861	0.0339339	37.8937	12.7897	0.915892	-0.333484	0.0888396	0.00634568	-0.52066	0.472644	0.0337603	-24.2751	12.7569	0.911207	-0.000790793	-0.000766496	-0.000857567	-0.000804952	-0.843739	-0.00806014	-0.140488	1.08571	0.944704	-0.300275	0.618692	18.5507	0.649077
P5052	SS-212.9	09/24/21	2.11275	0.00902203	0.000820185	10.9186	0.0133729	0.00121572	19.7071	0.00902203	0.000820185	20.0539	0.0133729	0.00121572	40.0556	0.137039	0.0125099	39.5096	0.554674	0.0506346	16.2246	6.7333	0.614663	-0.382169	0.136466	0.012406	-0.961236	0.552358	0.0502144	-42.7825	6.70518	0.609562	-0.00208612	-0.00194127	-0.00185048	-0.00195929	-0.87513	-0.00642714	-0.130054	1.03797	0.935599	-0.303688	0.62038	18.0178	0.593052
PL6294	SS-212.9	07/16/22	2.41831	0.0645791	0.00480013	12.0521	0.124328	0.00924125	20.0372	0.0645791	0.00480013	21.1971	0.124328	0.00924125	41.5845	0.18817	0.0140254	42.3532	0.403538	0.030078	45.8527	9.56194	0.712705	-0.348371	0.187647	0.0139477	-0.47002	0.402416	0.0299113	-17.3797	9.53534	0.708756	-0.00109939	0.0042681	-0.010335	-0.00238875	-0.830977	-0.0258518	0.162465	0.882335	0.789813	-0.249036	0.57008	35.2769	0.614281
PL6304	SS-212.9	07/18/22	2.33846	0.0360045	0.00530858	11.9101	0.0724334	0.0106797	19.9563	0.0360045	0.00530858	21.0538	0.0724334	0.0106797	41.3719	0.130505	0.0194546	42.0832	0.305437	0.0455319	44.7542	8.01763	1.1952	-0.332719	0.129047	0.019027	-0.448381	0.302024	0.044531	-18.058	7.92805	1.16893	-0.00128331	0.00520125	-0.0121245	-0.00273553	-0.830992	-0.0254766	0.209549	0.842525	0.767274	-0.219545	0.582302	30.8022	0.604288
PL7086	SS212.9	05/01/23	2.38624	0.00786626	0.000902322	11.9611	0.0119699	0.00137304	20.0035	0.00786626	0.000902322	21.1053	0.0119699	0.00137304	41.4613	0.0782967	0.00904092	42.0622	0.565478	0.0652957	38.6796	15.0989	1.74347	-0.344285	0.077773	0.00892117	-0.569466	0.561695	0.0644309	-23.9124	14.9979	1.72037	-0.000790793	-0.000770822	-0.000857567	-0.000806394	-0.843739	-0.00790918	-0.140488	1.08557	0.944605	-0.310851	0.607153	22.2741	0.63835
PL7087	SS212.9	05/01/23	2.37407	0.00909491	0.00104326	11.9312	0.0154655	0.00177401	19.9909	0.00909491	0.00104326	21.0751	0.0154655	0.00177401	41.4083	0.117989	0.0136241	42.7128	0.771749	0.0891139	62.0475	23.7053	2.73725	-0.35332	0.117199	0.0134437	0.113694	0.766587	0.0879335	-1.88161	23.5467	2.701	-0.000790793	-0.000770822	-0.000857567	-0.000806394	-0.843739	-0.00790918	-0.140488	1.08557	0.944605	-0.319929	0.597298	25.5692	0.629142
PL7109	SS212.9	05/06/23	2.43105	0.00684799	0.000509007	12.0818	0.0114455	0.000850736	20.0504	0.00684799	0.000509007	21.2271	0.0114455	0.000850736	41.6259	0.0922123	0.0068731	42.1281	0.436538	0.0325376	32.8453	12.8563	0.958252	-0.350887	0.0919558	0.00683502	-0.74461	0.435323	0.0323573	-29.6701	12.8205	0.952943	-0.000790793	-0.00085734	-0.000857567	-0.000835233	-0.843739	-0.00488984	-0.140488	1.08287	0.94262	-0.31612	0.600304	24.5526	0.633005
PL6192	DCMIX00	06/20/22	2.04031	0.0430521	0.00418159	5.78285	0.0805814	0.00782676	19.4586	0.0430521	0.00418159	14.8767	0.0805814	0.00782676	34.4364	0.145041	0.0141545	29.9078	0.36241	0.0353676	381.848	1797.28	175.396	-0.54536	0.144349	0.0140204	-0.064822	0.36068	0.0350323	315.033	1788.7	173.734	-0.00280015	0.0011741	0.00112318	-0.000167622	-0.877233	-0.0453281	-0.138309	1.06988	0.963926	-0.539587	0.386634	140.919	0.346109
PL6220	DCMIX00	06/27/22	1.96927	0.0283306	0.00195036	5.43266	0.0437966	0.00301508	19.3788	0.0283306	0.00195036	14.5235	0.0437966	0.00301508	34.0395	0.130965	0.00903742	29.4742	0.47614	0.0328568	874.975	3072.4	212.016	-0.506221	0.130652	0.00899448	0.210236	0.475005	0.0327007	785.686	3065.08	211.009	-0.00348569	0.00122427	0.00131006	-0.000317121	-0.877234	-0.0506257	-0.143047	1.07675	0.969959	-0.495427	0.436507	102.017	0.390193
PL6244	DCMIX-00	07/03/22	2.0225	0.0460636	0.0030641	5.72036	0.0872709	0.00580517	19.4395	0.0460636	0.0030641	14.8137	0.0872709	0.00580517	34.3321	0.133142	0.00887613	29.4849	0.319206	0.0212804	36.0939	10.1212	0.674746	-0.565775	0.132846	0.00883677	-0.351194	0.318496	0.021186	-13.8635	10.0987	0.671754	-0.0040733	0.00126728	0.00147024	-0.000445262	-0.877234	-0.0551664	-0.147107	1.08272	0.975192	-0.550489	0.379169	147.848	0.337527
PL6216	DCMIX-00	06/26/22	2.02352	0.0472626	0.00314386	5.59822	0.0910785	0.00605845	19.4361	0.0472626	0.00314386	14.6906	0.0910785	0.00605845	34.2488	0.153348	0.0102232	29.5956	0.365214	0.0243476	216.32	75.849	5.0566	-0.523665	0.153007	0.0101779	-0.00116081	0.364402	0.0242396	157.953	75.6803	5.03418	-0.00338776	0.0012171	0.00128336	-0.000295764	-0.877233	-0.0498689	-0.14237	1.07576	0.969092	-0.513536	0.416649	116.153	0.372115
PL6402	DCMIX00	08/17/22	2.09572	0.026826	0.00243873	5.81373	0.0597864	0.00543513	19.5123	0.026826	0.00243873	14.9079	0.0597864	0.00543513	34.5122	0.130506	0.0119135	29.8758	0.377861	0.0344939	48.0808	11.1036	1.01361	-0.556736	0.129961	0.0118147	-0.157464	0.376284	0.0342076	-2.71254	11.0572	1.0052	-0.000231072	-0.00352849	-0.000495481	-0.00141835	-0.882334	-0.0701235	-0.0920564	1.04893	0.9508	-0.507786	0.418168	115.015	0.341298
PL7067	DCMIX-DO	04/26/23	2.0538	0.00601707	0.000489662	5.83491	0.0116668	0.000949432	19.4732	0.00601707	0.000489662	14.9292	0.0116668	0.000949432	34.4912	0.0961962	0.00785438	29.9986	0.683084	0.0557736	46.6486	17.7218	1.44698	-0.558106	0.095875	0.0078022	-0.0801448	0.680803	0.055403	-4.07566	17.6627	1.43737	-0.000790793	-0.000792451	-0.000857567	-0.000813604	-0.843739	-0.00715434	-0.140488	1.0849	0.944109	-0.530044	0.369065	157.808	0.416014
PL7069	DCMIX-00	04/26/23	2.09245	0.00655097	0.000561741	5.9032	0.0110112	0.0009442	19.5124	0.00655097	0.000561741	14.9981	0.0110112	0.0009442	34.5753	0.0939148	0.00808289	29.7304	0.389122	0.0334903	27.6565	8.28527	0.713082	-0.583138	0.0935663	0.00802324	-0.4762	0.387678	0.0332432	-22.3178	8.25452	0.707819	-0.000790793	-0.000792451	-0.000857567	-0.000813604	-0.843739	-0.00715434	-0.140488	1.0849	0.944109	-0.555007	0.341982	188.439	0.390693
PL6208	DCMIX0	06/24/22	2.01911	0.0490763	0.00446148	4.06642	0.0969917	0.00881742	19.3783	0.0490763	0.00446148	13.1464	0.0969917	0.00881742	32.6856	0.173668	0.0158537	26.2827	0.354019	0.0323174	190.626	145.503	13.2825	-0.480402	0.172943	0.0157221	-0.178065	0.352541	0.0320492	136.958	144.896	13.1723	-0.00319189	0.00120277	0.00122997	-0.00025305	-0.877233	-0.0483553	-0.141016	1.07379	0.967364	-0.472131	0.460392	86.8961	0.413447
PL6243	DCMIX-0	07/02/22	2.17012	0.0476935	0.00408969	4.22733	0.0894311	0.00766865	19.5275	0.0476935	0.00408969	13.309	0.0894311	0.00766865	32.9682	0.145765	0.0125454	26.356	0.396795	0.0341507	31.9526	9.34016	0.803873	-0.515492	0.145224	0.0124528	-0.427365	0.395323	0.0338986	-15.0275	9.30551	0.797941	-0.00397536	0.00126011	0.00144354	-0.000423905	-0.877234	-0.0544097	-0.146431	1.08172	0.974316	-0.501516	0.431817	105.216	0.385961
PL6321	DCMIX-0	07/23/22	2.19283	0.060901	0.00405107	4.28731	0.0882561	0.00587071	19.5512	0.060901	0.00405107	13.3695	0.0882561	0.00587071	33.0851	0.149546	0.00996975	26.7308	0.344169	0.0229446	41.1138	11.046	0.736397	-0.485006	0.149214	0.00992554	-0.181775	0.343403	0.0228428	-6.42452	11.0214	0.733132	-0.00174309	0.00753412	-0.0165984	-0.00360246	-0.831028	-0.0245386	0.327257	0.748609	0.717425	-0.365819	0.44357	97.3489	0.474228
PL6237	DCMIX0	07/01/22	2.19351	0.0420624	0.00279795	4.20087	0.0812334	0.00540356	19.5488	0.0420624	0.00279795	13.2823	0.0812334	0.00540356	32.9769	0.141884	0.00945894	26.147	0.343247	0.0228831	24.1453	8.59003	0.572668	-0.502732	0.141568	0.009417	-0.578485	0.342483	0.0227816	-22.4507	8.57092	0.570129	-0.00387743	0.00125294	0.00141684	-0.000402548	-0.877234	-0.0536529	-0.145754	1.08072	0.973441	-0.489457	0.444475	96.7628	0.397888
PL6401	DCMIX0	08/17/22	2.21879	0.0293079	0.00194953	4.36144	0.0656707	0.00436835	19.5785	0.0293079	0.00194953	13.4442	0.0656707	0.00436835	33.1737	0.135736	0.00904905	26.3495	0.35961	0.023974	11.0832	10.3779	0.691857	-0.499354	0.135434	0.00900892	-0.700633	0.35881	0.0238677	-35.2513	10.3548	0.688789	-0.000231072	-0.00352849	-0.000495481	-0.00141835	-0.882334	-0.0701235	-0.0920564	1.04893	0.9508	-0.452302	0.476367	77.7467	0.387939
PL7082	DCMIX-0	04/30/23	2.21276	0.00795457	0.000647334	4.3051	0.0131209	0.00106777	19.5708	0.00795457	0.000647334	13.3874	0.0131209	0.00106777	33.1022	0.0849637	0.00693726	26.3111	0.3625	0.029598	22.2099	8.7321	0.712973	-0.505729	0.08468	0.00689116	-0.625915	0.361289	0.0294013	-24.5193	8.70294	0.708235	-0.000790793	-0.000775148	-0.000857567	-0.000807836	-0.843739	-0.00775821	-0.140488	1.08544	0.944506	-0.478988	0.424593	110.308	0.467802
PL7070	DCMIX-0	04/27/23	2.11642	0.00648973	0.000446772	4.45615	0.0106634	0.000734096	19.4845	0.00648973	0.000446772	13.5395	0.0106634	0.000734096	33.1436	0.0837327	0.0057781	26.8044	0.453553	0.0312981	26.821	9.33416	0.644118	-0.525798	0.0835331	0.00575065	-0.445599	0.452472	0.0311494	-20.3194	9.31191	0.641058	-0.000790793	-0.000788125	-0.000857567	-0.000812162	-0.843739	-0.00730531	-0.140488	1.08503	0.944208	-0.49888	0.402906	126.926	0.447625
PL6193	DCMIX1	06/20/22	2.29322	0.0266543	0.00206878	2.8475	0.0423287	0.00328534	19.5962	0.0266543	0.00206878	11.9183	0.0423287	0.00328534	31.7647	0.131049	0.0102021	24.3351	0.777215	0.0605061	2342.86	18449	1436.25	-0.400435	0.130651	0.0101405	0.348326	0.774856	0.0601405	2199.07	18393	1427.57	-0.00280015	0.0011741	0.00112318	-0.000167622	-0.877233	-0.0453281	-0.138309	1.06988	0.963926	-0.395111	0.541206	46.6855	0.490334
PL6223	DCMIX1	06/27/22	2.20567	0.0286096	0.00260087	2.62439	0.0424501	0.0038591	19.5051	0.0286096	0.00260087	11.6932	0.0424501	0.0038591	31.4368	0.13388	0.0122215	23.7895	0.438813	0.040058	184.574	2768.23	252.704	-0.407432	0.133321	0.0121201	0.260423	0.436981	0.0397256	134.224	2756.67	250.606	-0.00348569	0.00122427	0.000557345	-0.000568024	-0.877234	-0.0506257	-0.123965	1.06513	0.959035	-0.389575	0.544087	45.49	0.490482
PL6240	DCMIX 1	07/01/22	2.27282	0.0413484	0.0030734	2.84712	0.0797773	0.0059298	19.5768	0.0413484	0.0030734	11.9179	0.0797773	0.0059298	31.6948	0.143591	0.0107027	23.5544	0.345747	0.0257704	21.0702	8.14624	0.607185	-0.448126	0.143192	0.0106434	-0.413271	0.344785	0.0256277	-22.8301	8.12358	0.603821	-0.00387743	0.00125294	0.00141684	-0.000402548	-0.877234	-0.0536529	-0.145754	1.08072	0.973441	-0.435368	0.502931	63.9642	0.451382
PL6276	DCMIX-1	07/11/22	2.21439	0.0415472	0.00403543	2.8245	0.0798161	0.00775242	19.5204	0.0415472	0.00403543	11.8949	0.0798161	0.00775242	31.6173	0.137187	0.0133881	23.8868	0.341087	0.0332867	41.7684	15.7384	1.53591	-0.443957	0.136532	0.0132612	-0.0433534	0.339459	0.0329712	-2.91868	15.6633	1.52135	-0.000639607	0.00193523	-0.00586107	-0.00152182	-0.830941	-0.0267898	0.0447562	0.983747	0.85218	-0.395841	0.462772	85.4875	0.494452
PL6214	DCMIX-1	06/25/22	2.20805	0.018635	0.00180999	2.88554	0.0354601	0.00344419	19.5165	0.018635	0.00180999	11.9565	0.0354601	0.00344419	31.6999	0.104478	0.010196	24.1247	0.336538	0.0328428	279.64	107.578	10.4986	-0.419754	0.10398	0.0100994	0.0673885	0.334932	0.0325314	224.608	107.065	10.3991	-0.00328982	0.00120994	0.00125666	-0.000274407	-0.877233	-0.0491121	-0.141693	1.07478	0.968227	-0.411056	0.526433	53.0347	0.474416
PL6404	DCMIX-1	08/17/22	2.283	0.0264526	0.00205312	2.78815	0.0616503	0.00478499	19.5844	0.0264526	0.00205312	11.8584	0.0616503	0.00478499	31.6688	0.114956	0.00894927	23.1453	0.337674	0.0262879	4.0137	12.3328	0.960111	-0.423299	0.114607	0.0088952	-0.695404	0.336649	0.026129	-39.05	12.2954	0.954309	-0.000231072	-0.00352849	-0.000495481	-0.00141835	-0.882334	-0.0701235	-0.0920564	1.04893	0.9508	-0.378381	0.553904	41.5147	0.45008
PL7073	DCMIX-1	04/27/23	2.26128	0.00794698	0.00083307	3.02299	0.00999767	0.00104804	19.572	0.00794698	0.00083307	12.0951	0.00999767	0.00104804	31.8436	0.0867193	0.00914101	24.0882	0.379602	0.0400135	24.9605	9.38022	0.988762	-0.471312	0.0862361	0.00904	-0.24223	0.377487	0.0395714	-19.4397	9.32797	0.977836	-0.000790793	-0.000788125	-0.000857567	-0.000812162	-0.843739	-0.00730531	-0.140488	1.08503	0.944208	-0.44545	0.460879	86.6061	0.501821
PL7072	DCMIX-1	04/27/23	2.25795	0.00848485	0.000889454	3.01768	0.0120453	0.00126269	19.5686	0.00848485	0.000889454	12.0898	0.0120453	0.00126269	31.8358	0.0885941	0.00933864	23.9192	0.293818	0.0309711	23.8618	9.15659	0.96519	-0.470281	0.0881005	0.00923544	-0.396696	0.292181	0.0306289	-20.4772	9.10558	0.954524	-0.000790793	-0.000788125	-0.000857567	-0.000812162	-0.843739	-0.00730531	-0.140488	1.08503	0.944208	-0.444426	0.461991	85.9477	0.50286
PL6215	DCMIX-2	06/26/22	2.13396	0.0501986	0.00373124	3.387	0.097312	0.00723315	19.4637	0.0501986	0.00373124	12.4618	0.097312	0.00723315	32.1312	0.16616	0.0123849	25.3093	0.403064	0.0300426	276.195	84.0497	6.26469	-0.439182	0.165698	0.0123162	0.224968	0.401943	0.0298762	220.181	83.8159	6.22999	-0.00338776	0.0012171	0.00128336	-0.000295764	-0.877233	-0.0498689	-0.14237	1.07576	0.969092	-0.429679	0.506859	62.0607	0.455826
PL6320	DCMIX-2	07/23/22	2.2077	0.0569724	0.00553365	3.34282	0.106211	0.0103161	19.5322	0.0569724	0.00553365	12.4174	0.106211	0.0103161	32.1361	0.168731	0.0164664	25.0685	0.41241	0.0402471	58.4641	18.4052	1.79616	-0.460727	0.167925	0.0163103	0.0777397	0.410441	0.0398656	12.0212	18.3173	1.77913	-0.00174309	0.00753412	-0.0165984	-0.00360246	-0.831028	-0.0245386	0.327257	0.748609	0.717425	-0.344958	0.459186	87.6162	0.492776
PL6241	DCMIX-2	07/02/22	2.22433	0.0906257	0.00602833	3.42908	0.0673428	0.00447958	19.5511	0.0906257	0.00602833	12.5044	0.0673428	0.00447958	32.2327	0.152028	0.0101352	24.8824	0.477744	0.0318496	31.631	14.1199	0.941328	-0.470647	0.151689	0.0100902	-0.275641	0.476681	0.0317083	-13.8205	14.0885	0.937154	-0.00397536	0.00126011	0.00144354	-0.000423905	-0.877234	-0.0544097	-0.146431	1.08172	0.974316	-0.456983	0.479989	75.7671	0.430004
PL7074	DCMIX-2	04/28/23	2.22928	0.00838429	0.000682304	3.82603	0.0110093	0.000895924	19.5697	0.00838429	0.000682304	12.9046	0.0110093	0.000895924	32.6243	0.0813648	0.00664341	25.3996	0.329973	0.0269422	23.5229	9.20371	0.75148	-0.498699	0.0810931	0.00659926	-0.561323	0.328871	0.0267632	-22.3499	9.17298	0.746486	-0.000790793	-0.000783799	-0.000857567	-0.00081072	-0.843739	-0.00745628	-0.140488	1.08517	0.944307	-0.47225	0.431836	105.203	0.474637
PL7077	DCMIX-2	04/28/23	2.25614	0.00862068	0.000701541	3.32026	0.0111718	0.000909148	19.5775	0.00862068	0.000701541	12.3948	0.0111718	0.000909148	32.1544	0.0906336	0.00740021	24.4508	0.378956	0.0309416	24.3793	8.23963	0.672763	-0.466786	0.090331	0.00735103	-0.480177	0.37769	0.030736	-20.5713	8.21212	0.668293	-0.000790793	-0.000783799	-0.000857567	-0.00081072	-0.843739	-0.00745628	-0.140488	1.08517	0.944307	-0.440717	0.466054	83.5716	0.506621
PL7078	DCMIX-2	04/29/23	2.26133	0.00801396	0.000652167	3.32988	0.0112364	0.000914408	19.5828	0.00801396	0.000652167	12.4045	0.0112364	0.000914408	32.1615	0.0832347	0.00679609	24.8415	0.535061	0.0436876	36.2682	14.5801	1.19046	-0.474627	0.0829568	0.00675093	-0.118214	0.533275	0.0433973	-9.2283	14.5315	1.18255	-0.000790793	-0.000779473	-0.000857567	-0.000809278	-0.843739	-0.00760724	-0.140488	1.0853	0.944406	-0.448599	0.45754	88.606	0.498626
PL6406	DCMIX-2	08/18/22	2.2116	0.0224254	0.00154383	3.61637	0.0527702	0.00363285	19.5455	0.0224254	0.00154383	12.6932	0.0527702	0.00363285	32.3799	0.130035	0.00897327	25.4414	0.350447	0.0241832	42.661	11.8218	0.815778	-0.505744	0.129725	0.00893064	-0.103242	0.349612	0.0240683	-3.63574	11.7936	0.811903	-0.000190365	-0.00374488	-0.000498559	-0.00147794	-0.882336	-0.0753526	-0.0876185	1.04849	0.950925	-0.457889	0.470831	80.8375	0.383243
PL6209	DCMIX6	06/24/22	2.22711	0.0290796	0.00236646	3.03557	0.0576572	0.00469208	19.5399	0.0290796	0.00236646	12.1077	0.0576572	0.00469208	31.8815	0.113398	0.00925892	24.3269	0.358001	0.0292307	239.625	107.46	8.7741	-0.414399	0.113019	0.0091974	-0.0341098	0.356806	0.0290364	185.937	107.102	8.7158	-0.00319189	0.00120277	0.00122997	-0.00025305	-0.877233	-0.0483553	-0.141016	1.07379	0.967364	-0.406332	0.531047	51.0114	0.479132
PL6245	DCMIX-6	07/03/22	2.29207	0.0519714	0.00445651	3.42054	0.0998844	0.00856502	19.6152	0.0519714	0.00445651	12.4959	0.0998844	0.00856502	32.3067	0.168566	0.0145078	24.4598	0.373694	0.0321624	38.8016	12.3112	1.05958	-0.455579	0.16794	0.0144008	-0.671189	0.372307	0.0319251	-7.016	12.2655	1.05176	-0.0040733	0.00126728	0.00147024	-0.000445262	-0.877234	-0.0551664	-0.147107	1.08272	0.975192	-0.441194	0.497504	66.6477	0.445619
PL6278	DCMIX-6	07/12/22	2.22625	0.0478963	0.00342117	2.9964	0.0828787	0.00591991	19.5377	0.0478963	0.00342117	12.0682	0.0828787	0.00591991	31.8242	0.16364	0.0109094	24.2903	0.402919	0.0268613	45.1081	17.01	1.134	-0.455115	0.154685	0.0110489	0.0156193	0.408665	0.0291904	0.568615	17.5472	1.25337	-0.000731563	0.0024018	-0.00675585	-0.0016952	-0.830949	-0.0266022	0.068298	0.963567	0.839092	-0.401167	0.452541	91.6631	0.47078
PL6225	DCMIX6	06/28/22	2.3111	0.0302423	0.00201169	3.12398	0.0473551	0.00315002	19.6229	0.0302423	0.00201169	12.197	0.0473551	0.00315002	32.0781	0.152183	0.0101456	24.694	0.463814	0.0309209	786.695	526.416	35.0944	-0.394582	0.151845	0.0101006	0.147771	0.462782	0.0307838	708.868	525.245	34.9388	-0.00358363	0.00123144	0.00133675	-0.000338477	-0.877234	-0.0513825	-0.143723	1.07774	0.970827	-0.383724	0.557272	40.1849	0.5017
PL7076	DCMIX-6	04/28/23	2.15151	0.00800504	0.000651441	3.04254	0.0141983	0.00115544	19.4683	0.00800504	0.000651441	12.1146	0.0141983	0.00115544	31.7713	0.086513	0.00706376	24.73	0.692039	0.0565048	47.814	20.3375	1.66055	-0.455402	0.0862241	0.00701682	0.345784	0.689728	0.0561293	2.4945	20.2696	1.64951	-0.000790793	-0.000783799	-0.000857567	-0.00081072	-0.843739	-0.00745628	-0.140488	1.08517	0.944307	-0.429644	0.478071	76.8113	0.517853
PL7080	DCMIX-6	04/29/23	2.28565	0.00812932	0.000661555	2.99816	0.0122019	0.000992978	19.5943	0.00812932	0.000661555	12.0701	0.0122019	0.000992978	31.8621	0.090512	0.00739028	24.0272	0.403	0.0329048	31.9961	10.5546	0.861783	-0.451659	0.0902098	0.00734117	-0.252495	0.401654	0.0326862	-12.6841	10.5194	0.856057	-0.000790793	-0.000779473	-0.000857567	-0.000809278	-0.843739	-0.00760724	-0.140488	1.0853	0.944406	-0.425873	0.482204	74.5732	0.521678
PL7081	DCMIX-6	04/29/23	2.28985	0.0074036	0.000776108	3.00736	0.0113725	0.00119216	19.5986	0.0074036	0.000776108	12.0794	0.0113725	0.00119216	31.861	0.0890519	0.00938689	24.3091	0.508364	0.0535863	38.835	15.3968	1.62296	-0.466116	0.0885558	0.00928317	0.00437007	0.505532	0.0529942	-6.16355	15.311	1.60503	-0.000790793	-0.000779473	-0.000857567	-0.000809278	-0.843739	-0.00760724	-0.140488	1.0853	0.944406	-0.440331	0.466513	83.3062	0.507013
PL6405	DCMIX-6	08/18/22	2.24998	0.0228182	0.00151785	3.1448	0.0537738	0.00357698	19.5655	0.0228182	0.00151785	12.2179	0.0537738	0.00357698	31.9683	0.125728	0.00838188	24.357	0.348715	0.0232477	41.1317	11.6355	0.775702	-0.4631	0.125449	0.00834471	-0.222364	0.34794	0.0231446	-4.19966	11.6096	0.772262	-0.000190365	-0.00374488	-0.000498559	-0.00147794	-0.882336	-0.0753526	-0.0876185	1.04849	0.950925	-0.415853	0.514906	58.2605	0.41858
PL6194	NIST-88b	06/21/22	2.29761	0.0430466	0.00286342	2.05391	0.0828285	0.00550967	19.5725	0.0430466	0.00286342	11.1183	0.0828285	0.00550967	30.96	0.142416	0.0094944	22.4378	0.342834	0.0228556	255.999	105.285	7.019	-0.379169	0.142099	0.0094523	0.0759919	0.342071	0.0227542	203.872	105.051	6.98788	-0.00289808	0.00118127	0.00114988	-0.000188979	-0.877233	-0.0460849	-0.138986	1.07085	0.964783	-0.373318	0.565014	37.1905	0.512088
PL6222	NIST-88B	06/27/22	2.27015	0.0334914	0.00325298	1.99444	0.0551965	0.00536116	19.5443	0.0334914	0.00325298	11.0583	0.0551965	0.00536116	30.8794	0.144513	0.014103	22.3582	0.482493	0.0470865	563.939	7170.98	699.816	-0.370504	0.143823	0.0139694	0.116884	0.48019	0.0466402	499.25	7136.75	693.182	-0.00348569	0.00122427	0.00131006	-0.000317121	-0.877234	-0.0506257	-0.143047	1.07675	0.969959	-0.360711	0.581562	31.0676	0.524673
PL6317	NIST-88B	07/22/22	2.23045	0.0587954	0.00391101	1.9503	0.121366	0.00807318	19.505	0.0587954	0.00391101	11.0137	0.121366	0.00807318	30.7525	0.208729	0.0139153	22.4735	0.637206	0.0424804	57.4414	23.8107	1.58738	-0.410466	0.208265	0.0138536	0.317815	0.635789	0.042292	13.8326	23.7578	1.58034	-0.00165113	0.00706754	-0.0157036	-0.00342907	-0.831021	-0.0247262	0.303716	0.766626	0.726659	-0.305013	0.492829	69.012	0.528294
PL6300	NIST-88B	07/17/22	2.2281	0.0540856	0.00525326	2.06392	0.104543	0.0101541	19.5068	0.0540856	0.00525326	11.1283	0.104543	0.0101541	30.8856	0.181887	0.0177504	22.5605	0.500689	0.0488623	53.4822	19.6902	1.92157	-0.39448	0.181019	0.0175821	0.17631	0.498299	0.0483991	9.81001	19.5962	1.90335	-0.00119135	0.00473467	-0.0112297	-0.00256214	-0.830985	-0.0256642	0.186007	0.86231	0.778359	-0.315347	0.506433	62.2657	0.551732
PL6400	NIST-88B	08/16/22	2.34822	0.0371587	0.00247176	2.15403	0.0570553	0.00379526	19.6242	0.0371587	0.00247176	11.2194	0.0570553	0.00379526	31.0805	0.105504	0.0070336	22.2574	0.343049	0.0228699	30.4273	10.8639	0.724257	-0.412727	0.105269	0.00700241	-0.300239	0.342286	0.0227685	-12.5851	10.8397	0.721046	-0.000271779	-0.0033121	-0.000492403	-0.00135876	-0.882333	-0.0648944	-0.0964943	1.04914	0.950594	-0.370496	0.561894	38.3869	0.456709
PL6995	NIST-88b	03/24/23	2.15415	0.0054835	0.000984866	1.93053	0.0101542	0.00182375	19.4318	0.0054835	0.000984866	10.9937	0.0101542	0.00182375	30.6244	0.0783254	0.0143002	21.7147	0.311267	0.0568293	20.4651	8.91398	1.62746	-0.441126	0.0770089	0.0138312	-0.384756	0.306035	0.0549656	-21.5057	8.76416	1.57409	-0.000829501	-0.000757844	-0.00085759	-0.000814978	-0.843739	-0.00836208	-0.140488	1.08598	0.944903	-0.416168	0.492953	68.9482	0.531523
PL7022	NIST-88b	04/05/23	2.23363	0.00599457	0.000487831	2.31027	0.0096715	0.000787055	19.5207	0.00599457	0.000487831	11.3766	0.0096715	0.000787055	31.0934	0.0911999	0.00744644	21.9145	0.310667	0.0253659	5.56165	6.66174	0.545751	-0.448411	0.0908954	0.00739697	-0.946301	0.30963	0.0251973	-36.9415	7.89825	0.64275	-0.000790793	-0.000883295	-0.000857567	-0.000843885	-0.843739	-0.00398404	-0.140488	1.08206	0.942026	-0.422172	0.485212	72.9712	0.525433
PL7029	NIST-88b	04/08/23	2.25212	0.00698626	0.000568534	2.12103	0.105645	0.00859723	19.5316	0.00698626	0.000568534	11.1859	0.105645	0.00859723	30.9248	0.155093	0.0126633	22.7469	3.06581	0.250322	64.022	159.633	13.034	-0.437639	0.154575	0.0125791	0.244627	3.05557	0.248659	19.7722	159.1	12.9474	-0.000790793	-0.000870318	-0.000857567	-0.000839559	-0.843739	-0.00443694	-0.140488	1.08246	0.942323	-0.411676	0.496699	67.0511	0.536079
P5489	CARRARA	01/06/22	1.88312	0.00723409	0.000758339	6.39217	0.0158977	0.00166653	19.3305	0.00723409	0.000758339	15.4906	0.0158977	0.00166653	34.8901	0.132921	0.0140111	30.2786	0.553487	0.0583426	10.7435	10.1293	1.06773	-0.571682	0.132181	0.0138563	-0.913786	0.550403	0.057698	-39.1418	10.0729	1.05593	-0.00029622	-0.000660529	-0.000372856	-0.000443202	-0.853212	-0.00102078	-0.111519	1.0526	0.924443	-0.556218	0.338967	192.268	0.393166
P5516	CARRARA	01/11/22	1.89688	0.0101116	0.00105999	6.38504	0.0152617	0.00159986	19.3433	0.0101116	0.00105999	15.4834	0.0152617	0.00159986	34.8586	0.125563	0.0132355	30.8513	0.46644	0.0491671	28.2211	11.649	1.22791	-0.60817	0.124864	0.0130893	-0.344363	0.463841	0.0486238	-22.5264	11.5841	1.21435	5.88817e-06	-0.000537703	-0.000121691	-0.000217835	-0.853212	0.00116575	-0.111649	1.05096	0.923193	-0.600576	0.292014	267.689	0.357059
P5588	CARRARA	02/01/22	1.87201	0.00836343	0.000876726	6.23602	0.0153718	0.00161141	19.3144	0.00836343	0.000876726	15.3332	0.0153718	0.00161141	34.6819	0.122807	0.012945	30.4569	0.432342	0.0455728	35.3083	10.3217	1.088	-0.604234	0.122123	0.012802	-0.431065	0.429933	0.0450692	-15.473	10.2642	1.07598	0.00127474	-2.18318e-05	0.000933202	0.000728705	-0.853212	0.0103492	-0.112197	1.04398	0.917947	-0.629507	0.260754	344.502	0.33302
PL5653	CARRARA	02/19/22	1.95967	0.0335886	0.00326241	6.50241	0.0568384	0.00552064	19.4071	0.0335886	0.00326241	15.6019	0.0568384	0.00552064	35.1213	0.107896	0.0105295	32.1938	0.71014	0.0693025	113.623	29.6393	2.8925	-0.53368	0.10738	0.0104297	0.724003	0.70675	0.0686456	58.3474	29.4978	2.86508	0.00057681	-0.000196114	0.000182925	0.000187874	-0.846118	0.00654831	-0.0981524	1.04893	0.913461	-0.540279	0.346746	182.576	0.399148
PL5670	CARRARA	02/23/22	1.91037	0.00957631	0.00100387	6.40859	0.0144038	0.00150992	19.3569	0.00957631	0.00100387	15.5072	0.0144038	0.00150992	34.9224	0.11692	0.0123245	31.0963	0.542574	0.0571923	46.0294	17.1315	1.80581	-0.583393	0.116269	0.0121883	-0.153575	0.539551	0.0565603	-5.65696	17.036	1.78586	0.000746977	-0.000197974	0.000269959	0.000272987	-0.846118	0.00595652	-0.0942962	1.0473	0.911813	-0.592926	0.290839	270.076	0.356155
PL5701	CARARRA	03/02/22	1.95225	0.0304798	0.00261362	6.49716	0.058187	0.0049895	19.3999	0.0304798	0.00261362	15.5966	0.058187	0.0049895	35.0165	0.103777	0.00893171	31.0632	0.472488	0.0406653	36.7208	12.0188	1.03441	-0.622405	0.103392	0.00886579	-0.361605	0.470735	0.0403652	-14.7202	11.9742	1.02678	0.00104477	-0.000201229	0.000422267	0.000421935	-0.846118	0.00492088	-0.0875478	1.04434	0.908902	-0.63718	0.243467	404.091	0.319726
PL5722	CARARRA	03/06/22	1.91335	0.0109485	0.00114771	6.27754	0.0208941	0.00219029	19.3552	0.0109485	0.00114771	15.3751	0.0208941	0.00219029	34.8085	0.124156	0.0130872	31.5276	0.725837	0.0765099	105.714	25.5699	2.69531	-0.563789	0.123464	0.0129426	0.52496	0.721793	0.0756645	51.3488	25.4275	2.66552	0.00121494	-0.000203089	0.0005093	0.000507049	-0.846118	0.00432909	-0.0836915	1.04259	0.907225	-0.581438	0.301023	250.379	0.363986
PL5764	CARRARA	03/15/22	1.97614	0.00924432	0.000969068	6.43274	0.017913	0.0018778	19.4203	0.00924432	0.000969068	15.5317	0.017913	0.0018778	35.0245	0.119652	0.0126124	31.6624	0.569316	0.0600112	146.488	107.968	11.3809	-0.572561	0.118985	0.0124731	0.347159	0.566144	0.059348	89.7139	107.367	11.2551	-0.000231482	-0.000182164	-0.000208724	-0.000207457	-0.87104	0.0109868	-0.115505	1.02274	0.918172	-0.565295	0.340024	190.914	0.393979
PL5801	CARRARA	03/23/22	1.76552	0.00999524	0.00104779	6.03396	0.0170117	0.00178331	19.2061	0.00999524	0.00104779	15.1292	0.0170117	0.00178331	34.3761	0.126433	0.0133272	32.4825	1.05224	0.110915	265.154	80.0682	8.43992	-0.592739	0.125728	0.0131799	1.93627	1.04637	0.10969	203.71	79.6221	8.34666	0.000108852	-0.000185884	-3.46577e-05	-3.723e-05	-0.87104	0.00980318	-0.107793	1.02	0.915062	-0.591459	0.311774	231.745	0.372254
PL5825	CARARRA	03/29/22	1.89536	0.0114178	0.000979068	6.32592	0.0141294	0.00121158	19.3398	0.0114178	0.000979068	15.4238	0.0141294	0.00121158	34.8501	0.095697	0.00823629	33.3763	1.47446	0.126901	399.16	149.991	12.9091	-0.55523	0.0953419	0.0081755	2.22183	1.46898	0.125964	330.263	149.434	12.8139	0.000364102	-0.000188674	9.58921e-05	9.044e-05	-0.87104	0.00891549	-0.102009	1.01783	0.9127	-0.558382	0.344362	185.481	0.397315
PL5942	CARARRA	04/26/22	1.99412	0.0349037	0.00317307	6.64752	0.0639099	0.00580999	19.4449	0.0349037	0.00317307	15.7482	0.0639099	0.00580999	35.2514	0.112579	0.010277	32.2155	0.418131	0.0381699	144.175	31.5239	2.87772	-0.587969	0.112109	0.0101918	0.456722	0.416385	0.0378532	87.0318	31.3922	2.85384	-0.000743519	0.00165162	0.000562554	0.000490217	-0.860733	0.0475891	-0.124097	1.00933	0.900919	-0.60525	0.290025	271.749	0.355529
PL5966	CARARRA	05/02/22	1.89623	0.034967	0.00240723	6.30609	0.0612188	0.00421447	19.3399	0.034967	0.00240723	15.4038	0.0612188	0.00421447	34.8245	0.129859	0.00865727	31.9304	0.707245	0.0471497	202.638	68.9632	4.59755	-0.565816	0.130351	0.00897372	0.884584	0.708401	0.0487683	147.632	68.6837	4.72838	-0.00133113	0.00213049	0.000722734	0.000507364	-0.860733	0.0686951	-0.128157	0.992888	0.890143	-0.583485	0.310808	233.339	0.371511
PL5993	CARRARA	05/09/22	1.91087	0.0370758	0.00337053	6.45825	0.0638299	0.00580272	19.3592	0.0370758	0.00337053	15.5573	0.0638299	0.00580272	35.0035	0.140571	0.0128323	32.9056	0.884387	0.0807331	252.275	76.3688	6.97148	-0.555727	0.139984	0.0127258	1.50211	0.880694	0.0800631	190.28	76.0499	6.91363	-0.00201667	0.00268917	0.000909609	0.000527368	-0.860734	0.0933188	-0.132895	0.973075	0.877616	-0.574187	0.318889	220.456	0.377725
PL7079	CARARRA	04/29/23	1.97266	0.00868315	0.000843382	6.44164	0.0121133	0.00117655	19.4173	0.00868315	0.000843382	15.5406	0.0121133	0.00117655	35.0113	0.0892031	0.00870533	31.0219	0.565641	0.0552009	39.0628	15.7636	1.53837	-0.590944	0.0887773	0.00862281	-0.291631	0.562941	0.0546777	-12.4056	15.6884	1.52379	-0.000790793	-0.000779473	-0.000857567	-0.000809278	-0.843739	-0.00760724	-0.140488	1.0853	0.944406	-0.56261	0.333803	199.054	0.389195
PL6178	CARARRA	06/16/22	1.95999	0.0270949	0.00210297	6.38611	0.0529334	0.00410843	19.4033	0.0270949	0.00210297	15.4846	0.0529334	0.00410843	34.9621	0.141571	0.0110213	31.2845	0.459088	0.0357399	34.8708	1891.86	147.281	-0.570142	0.141141	0.0109547	0.073315	0.457694	0.035524	-16.2689	1886.12	146.391	-0.00054765	0.00125256	0.000402375	0.000369095	-0.877231	0.0300008	-0.120036	1.00259	0.908851	-0.583046	0.324292	212.37	0.381881

## Sheet: Table S7 Samples D48
SAMPLE NAME	DATE	δ45	δ45 sd	δ46	δ46 sd	δ47	δ47 sd	Δ47	δ48	δ48 sd	Δ48	δ49	δ49 sd	Δ49	Δ48 SGvsWG	Δ48 (CDES) (‰)
CLINO-1204.42-2AW	2022-03-09 00:01:00	20.43	0.029	21.032	0.057	41.905	0.068	-0.286	42.956	0.094	0.431	89.611	4.792	23.623	-0.0839185	0.217251
CLINO-1204.42-2AW	2022-03-15 00:08:00	20.513	0.006	21.177	0.01	42.138	0.021	-0.284	43.32	0.047	0.496	95.268	7.304	28.563	-0.0653776	0.236603
CLINO-1204.42-2AW	2022-03-18 00:06:00	20.464	0.007	21.073	0.012	41.973	0.028	-0.293	43.046	0.078	0.437	77.339	5.069	11.979	-0.120827	0.165522
CLINO-1204.42-2AW	2022-03-19 12:42:00	20.433	0.01	21.005	0.02	41.9	0.034	-0.268	42.949	0.08	0.477	97.166	9.981	30.772	-0.0795699	0.21841
CLINO-1204.42-2AW	2022-03-30 23:37:00	20.441	0.004	20.995	0.008	41.891	0.019	-0.274	42.907	0.103	0.457	88.858	7.256	22.978	-0.0990256	0.19347
CLINO-1204.42-2AW	2023-05-07 00:30:00	20.528	0.003	21.173	0.004	42.139	0.026	-0.295	43.124	0.133	0.317	24.898	2.103	-37.529	-0.0752573	0.177651
CL-1204.42-2AW	2023-05-11 11:26:00	20.532	0	21.2	0.002	42.076	0.027	-0.386	43.197	0.079	0.334	23.217	0.764	-39.161	-0.0589213	0.196024
CL-1204.42-2AW	2023-05-11 08:15:00	20.53	0.002	21.198	0.004	42.075	0.022	-0.382	43.205	0.079	0.346	24.033	2.191	-38.389	-0.0469941	0.209438
CLINO-1207.67-2AW	2022-03-12 00:45:00	21.444	0.02	20.784	0.038	42.706	0.066	-0.303	42.442	0.102	0.423	79.443	3.654	13.481	-0.127	0.157609
CLINO-1207.67-2AW	2022-03-14 14:31:00	21.525	0.005	20.983	0.009	43.01	0.026	-0.285	42.871	0.12	0.446	102.661	9.098	34.798	-0.109559	0.179967
CLINO-1206.67-2AW	2022-03-20 22:38:00	21.407	0.008	20.835	0.017	42.73	0.026	-0.292	42.547	0.094	0.426	86.46	5.541	20.01	-0.12536	0.159711
CLINO-1207.67-2AW	2022-03-31 12:19:00	21.533	0.005	21.058	0.009	43.111	0.035	-0.269	43.061	0.099	0.481	101.393	4.743	33.448	-0.0770213	0.221677
CLINO-1207.67-2AW	2022-04-09 12:15:00	21.533	0.008	21.038	0.016	43.085	0.029	-0.274	42.993	0.08	0.454	94.17	10.239	26.711	-0.10314	0.188195
CLINO-1207.67-2AW	2022-04-25 12:14:00	21.498	0.016	20.996	0.03	43.015	0.038	-0.266	42.904	0.094	0.452	84.589	5.899	17.84	-0.0749044	0.211573
CLINO-1206.67-2AW	2022-06-22 02:20:00	21.633	0.036	21.235	0.068	43.281	0.086	-0.377	43.346	0.155	0.408	78.211	4.81	11.247	-0.0642528	0.225894
CLINO-1211-2AW	2022-02-12 12:21:00	21.732	0.022	20.925	0.042	43.185	0.055	-0.27	42.69	0.074	0.386	98.769	5.993	31.037	-0.12573	0.167818
CLINO-1211-2AW	2022-02-15 22:07:00	21.769	0.02	21.028	0.036	43.295	0.05	-0.302	42.896	0.064	0.381	97.219	6.72	29.339	-0.133199	0.158987
CLINO-1211-2AW	2022-02-19 23:53:00	21.748	0.021	21.021	0.039	43.256	0.039	-0.311	42.882	0.065	0.381	86.595	8.86	19.408	-0.133031	0.159185
CLINO-1211-2AW	2022-02-20 23:46:00	21.73	0.023	20.941	0.043	43.209	0.064	-0.261	42.757	0.156	0.419	87.764	5.229	20.68	-0.093533	0.205884
CLINO-1211-2AW	2022-02-21 11:41:00	21.648	0.025	20.785	0.048	42.936	0.053	-0.29	42.396	0.099	0.378	85.633	6.397	19.074	-0.130206	0.162526
CLINO-1211-2AW	2022-03-31 19:46:00	21.717	0.006	20.898	0.01	43.128	0.014	-0.284	42.712	0.112	0.46	90.746	5.433	23.577	-0.0934986	0.200555
CLINO-1211-2AW	2022-06-21 17:15:00	21.756	0.01	20.942	0.012	43.121	0.052	-0.373	42.675	0.101	0.338	71.688	7.204	5.566	-0.126942	0.160806
CLINO-1211-2AW	2022-07-08 17:25:00	21.806	0.03	21.077	0.06	43.283	0.065	-0.398	42.911	0.152	0.3	81.787	2.646	14.726	-0.068978	0.207544
CLINO-12011-2AW	2023-05-07 13:34:00	21.733	0.003	20.929	0.003	43.134	0.019	-0.325	42.607	0.066	0.299	26.827	2.888	-36.479	-0.0885546	0.162695
CLINO-12011-2AW	2023-05-07 17:26:00	21.738	0.005	20.94	0.01	43.19	0.032	-0.286	42.663	0.057	0.331	28.628	3.095	-34.815	-0.057064	0.198112
CLINO-1213.41-2AW	2022-03-21 16:54:00	21.639	0.007	20.665	0.012	42.8	0.029	-0.295	42.224	0.078	0.448	87.994	9.054	21.535	-0.0991747	0.193278
CLINO-1213.41-2AW	2022-03-22 10:52:00	21.418	0.006	20.098	0.011	42.028	0.03	-0.267	41.064	0.086	0.446	83.725	6.362	18.875	-0.0861424	0.209985
CLINO-1213.41-2AW	2022-03-27 23:45:00	21.546	0.005	20.609	0.009	42.658	0.02	-0.284	42.114	0.085	0.452	92.137	6.969	25.635	-0.0937492	0.200233
CLINO-1213.41-2AW	2022-03-28 12:48:00	21.604	0.005	20.514	0.012	42.631	0.029	-0.277	41.938	0.127	0.471	91.776	5.73	25.424	-0.0724685	0.227513
CLINO-1213.41-2AW	2022-04-02 18:42:00	21.526	0.007	20.547	0.015	42.589	0.018	-0.27	41.978	0.073	0.444	93.799	8.007	27.341	-0.0999868	0.192237
CLINO-12013.41-2AW	2023-05-07 23:38:00	21.645	0.003	20.747	0.005	42.9	0.03	-0.284	42.237	0.156	0.301	24.992	2.697	-37.775	-0.0831891	0.16873
CLINO-1213.41-2AW	2023-05-15 06:41:00	21.622	0.004	20.777	0.006	42.921	0.03	-0.27	42.333	0.05	0.333	27.146	2.697	-35.787	-0.031172	0.251539
CLINO-1215-3AW	2021-09-11 11:59:00	21.813	0.003	21.063	0.002	43.368	0.02	-0.31	43.095	0.146	0.504	41.339	4.189	-23.195	-0.136912	0.187327
CLINO-1215-3AW	2022-02-12 18:03:00	21.922	0.015	21.351	0.028	43.816	0.043	-0.268	43.572	0.073	0.396	102.504	6.305	33.487	-0.126303	0.167141
CLINO-1215-3AW	2022-02-13 18:47:00	22.014	0.024	21.619	0.041	44.17	0.063	-0.28	44.134	0.104	0.411	97.161	7.889	27.851	-0.118039	0.17691
CLINO-1215-3AW	2022-02-22 23:25:00	21.946	0.025	21.37	0.047	43.858	0.052	-0.27	43.611	0.105	0.398	88.472	6.319	20.273	-0.12477	0.168953
CLINO-1215-3AW	2022-02-23 23:17:00	21.93	0.034	21.412	0.062	43.874	0.077	-0.279	43.738	0.114	0.438	90.029	7.234	21.667	-0.0862924	0.214445
CLINO-1215-3AW	2022-04-02 23:48:00	21.945	0.011	21.435	0.021	43.933	0.01	-0.26	43.827	0.053	0.477	89.68	6.027	21.278	-0.0909477	0.203825
CLINO-1215-2AW	2023-05-08 15:18:00	21.966	0.002	21.523	0.001	44.003	0.031	-0.3	43.837	0.124	0.313	26.219	1.202	-38.384	-0.0857428	0.165858
CLINO-1215-2AW	2023-05-08 18:06:00	21.972	0.002	21.531	0.002	44.035	0.032	-0.283	43.907	0.036	0.365	25.805	0.563	-38.793	-0.0343795	0.223626
CLINO-1226.67-2AW	2022-03-21 22:45:00	21.529	0.007	20.359	0.014	42.399	0.022	-0.274	41.885	0.118	0.471	89.877	5.479	24.024	-0.0717816	0.228394
CLINO-1226.67-2AW	2022-03-22 16:44:00	21.518	0.004	20.374	0.009	42.413	0.023	-0.265	41.669	0.108	0.487	95.202	2.386	29.009	-0.0529825	0.252492
CLINO-1226.67-2AW	2022-03-27 18:53:00	21.566	0.005	20.479	0.009	42.548	0.012	-0.284	41.866	0.052	0.47	92.977	4.324	26.661	-0.0725354	0.227427
CLINO-1226.67-2AW	2022-03-28 07:06:00	21.506	0.006	20.348	0.011	42.387	0.023	-0.253	41.606	0.042	0.476	99.02	8.578	32.661	-0.0631661	0.239438
CLINO-1226.67-2AW	2022-03-28 07:06:00	21.506	0.004	20.344	0.005	42.394	0.019	-0.241	41.583	0.03	0.462	96.39	10.095	30.199	-0.0768681	0.221873
CLINO-1226.67-2AW	2022-04-03 08:46:00	21.554	0.007	20.456	0.014	42.54	0.025	-0.257	41.835	0.063	0.484	90.08	4.15	23.997	-0.0581337	0.245889
CLINO-1226.67-2AW	2022-04-03 14:40:00	21.497	0.008	20.441	0.015	42.449	0.023	-0.273	41.788	0.081	0.468	80.556	8.2	15.14	-0.0735246	0.226159
CLINO-1231.85-2AW	2022-03-22 07:45:00	21.645	0.006	20.583	0.015	42.734	0.034	-0.286	42.15	0.026	0.516	99.595	7.808	32.585	-0.0302157	0.281677
CLINO-1231.85-2AW	2022-03-23 10:01:00	21.646	0.007	20.543	0.014	42.717	0.027	-0.265	42.003	0.041	0.475	102.171	5.16	35.082	-0.0693108	0.231561
CLINO-1231.85-2AW	2022-03-27 10:27:00	21.661	0.005	20.528	0.008	42.699	0.025	-0.283	41.967	0.047	0.47	109.357	11.515	41.844	-0.0738443	0.22575
CLINO-1231.85-2AW	2022-03-28 17:00:00	21.571	0.005	20.512	0.011	42.595	0.033	-0.276	41.964	0.07	0.498	91.224	5.187	24.943	-0.0458054	0.261693
CLINO-1231.85-2AW	2022-04-03 19:06:00	21.673	0.007	20.623	0.015	42.818	0.023	-0.272	42.168	0.086	0.477	82.061	3.212	16.012	-0.069449	0.231384
CLINO-1231.85-2AW	2022-04-09 23:59:00	21.593	0.004	20.452	0.006	42.552	0.004	-0.282	41.849	0.046	0.506	95.225	1.589	28.797	-0.0363151	0.273858
CLINO-1231.85-2AW	2022-04-25 17:13:00	21.658	0.028	20.533	0.052	42.702	0.082	-0.282	41.948	0.114	0.442	77.476	4.743	11.897	-0.0731637	0.213694
CLINO-1243.08-2AW	2022-03-01 07:25:00	22.069	0.032	21.284	0.059	43.9	0.083	-0.271	43.513	0.108	0.473	92.475	4.289	24.062	-0.0485953	0.259014
CLINO-1243.08-2AW	2022-03-03 22:36:00	21.911	0.024	21.309	0.045	43.749	0.072	-0.28	43.563	0.114	0.472	90.174	4.744	22.025	-0.0501947	0.257123
CLINO-1243.08-2AW	2022-03-07 17:20:00	21.965	0.026	20.95	0.05	43.431	0.067	-0.295	42.793	0.117	0.436	91.516	8.013	23.932	-0.0769646	0.225473
CLINO-1243.08-2AW	2022-03-07 23:56:00	21.919	0.026	21.032	0.049	43.464	0.064	-0.295	42.99	0.084	0.464	89.807	7.323	22.217	-0.051326	0.255785
CLINO-1243.08-2AW	2022-04-03 23:59:00	22.067	0.01	21.328	0.019	43.94	0.019	-0.274	43.626	0.067	0.494	84.767	6.558	16.753	-0.071343	0.228956
CLINO-1243.08-2AW	2022-06-21 22:04:00	22.059	0.008	21.224	0.009	43.739	0.032	-0.357	43.318	0.123	0.402	71.134	9.136	4.185	-0.0699477	0.219981
CLINO-1243.08-2AW	2021-09-18 03:08:00	21.537	0.003	20.145	0.004	42.144	0.018	-0.32	41.215	0.192	0.5	36.391	4.815	-25.836	-0.112953	0.21478
CLINO-1243.08-2AW	2022-07-10 12:08:00	22.028	0.076	21.137	0.131	43.7	0.198	-0.28	43.053	0.243	0.319	73.714	12.03	6.803	-0.051199	0.227858
CLINO-1783.25-2AW	2022-05-02 11:57:00	20.747	0.021	21.475	0.038	42.744	0.115	-0.228	43.902	0.188	0.47	83.806	10.332	16.969	-0.0691608	0.218571
CLINO-1783.25-2AW	2022-05-05 21:33:00	20.747	0.032	21.539	0.062	42.745	0.096	-0.287	44.051	0.116	0.488	67.601	5.377	1.638	-0.0529907	0.238273
CLINO-1783.25-2AW	2022-05-08 23:20:00	20.751	0.033	21.54	0.069	42.795	0.093	-0.245	44.028	0.157	0.465	68.688	5.435	2.653	-0.0757082	0.210594
CLINO-1783.25-2AW	2022-05-11 18:32:00	20.785	0.018	21.572	0.035	42.84	0.045	-0.267	44.081	0.121	0.452	69.287	4.436	3.117	-0.0893591	0.193961
CLINO-1783.25-2AW	2022-11-11 13:19:00	20.889	0.033	21.875	0.071	43.271	0.131	-0.251	44.333	0.239	0.1	78.748	3.722	11.292	0.00967462	0.166226
CLINO-1783.25-2AW	2023-05-08 22:03:00	20.853	0.002	21.892	0.005	43.233	0.019	-0.266	44.641	0.097	0.363	25.914	1.131	-38.232	-0.043056	0.213867
CLINO-1783.25-2AW	2023-05-14 15:18:00	20.903	0.003	21.951	0.008	43.247	0.038	-0.361	44.716	0.106	0.318	23.757	2.746	-40.414	-0.0666718	0.207437
CLINO-1796.8-2AW	2022-04-29 13:02:00	20.694	0.013	21.598	0.026	42.781	0.035	-0.257	44.108	0.087	0.427	74.379	3.706	7.938	-0.114691	0.163097
CLINO-1796.8-2AW	2022-05-04 16:38:00	20.84	0.019	21.816	0.037	43.111	0.072	-0.297	44.567	0.107	0.441	72.64	4.945	5.733	-0.106328	0.173287
CLINO-1796.8-2AW	2022-05-07 12:34:00	20.802	0.024	21.614	0.046	42.906	0.071	-0.262	44.171	0.125	0.456	79.549	7.241	12.643	-0.0864644	0.197488
CLINO-1796.8-2AW	2022-05-07 12:34:00	20.802	0.024	21.614	0.046	42.907	0.07	-0.26	44.171	0.125	0.456	79.549	7.241	12.643	-0.0864644	0.197488
CLINO-1796.8-2AW	2022-11-12 01:10:00	20.912	0.059	21.989	0.114	43.376	0.196	-0.282	44.582	0.334	0.115	72.551	2.686	5.239	0.0241673	0.182089
CLINO-1796.8-2AW	2022-11-12 10:23:00	20.9	0.022	21.968	0.039	43.331	0.108	-0.293	44.507	0.199	0.086	55.263	0.125	-10.911	-0.0046799	0.150513
CLINO-1796.8-2AW	2023-05-14 13:00:00	20.914	0.004	22.049	0.005	43.337	0.029	-0.379	44.9	0.158	0.303	23.677	2.738	-40.681	-0.0832547	0.186836
CLINO-1885.42-2AW	2022-04-30 01:05:00	20.856	0.038	21.416	0.074	42.767	0.101	-0.259	43.775	0.122	0.465	69.384	5.586	3.435	-0.0726011	0.214379
CLINO-1885.42-2AW	2022-05-02 23:03:00	20.998	0.022	21.419	0.042	42.908	0.056	-0.27	43.751	0.106	0.435	72.122	5.088	5.848	-0.102306	0.178186
CLINO-1885.42-2AW	2022-05-05 12:29:00	21.019	0.018	21.347	0.035	42.862	0.061	-0.266	43.617	0.127	0.448	72.807	2.384	6.607	-0.0876607	0.196031
CLINO-1885.42-2AW	2022-05-11 12:39:00	20.915	0.023	21.221	0.046	42.617	0.055	-0.275	43.342	0.07	0.432	64.836	0.973	-0.52	-0.100283	0.180651
CLINO-1885.42-2AW	2022-05-08 14:53:00	21.004	0.02	21.364	0.04	42.846	0.076	-0.283	43.645	0.072	0.442	69.432	3.312	3.424	-0.0940046	0.188301
CLINO-1885.42-2AW	2022-11-11 00:01:00	21.06	0.032	21.562	0.067	43.109	0.121	-0.277	43.693	0.196	0.1	71.894	4.335	5.293	0.0109786	0.167653
CLINO-1885.42-2AW	2022-11-11 09:53:00	21.012	0.017	21.471	0.034	42.929	0.066	-0.314	43.522	0.291	0.114	61.903	5.035	-3.855	0.025327	0.183358
CLINO-1872-2AW	2022-05-06 11:59:00	20.984	0.023	21.393	0.046	42.858	0.058	-0.279	43.7	0.132	0.437	70.92	4.701	4.785	-0.0996801	0.181386
CLINO-1872-2AW	2022-05-02 17:06:00	21.07	0.029	21.68	0.058	43.235	0.072	-0.281	44.294	0.139	0.444	79.613	6.853	12.291	-0.099975	0.181027
Clino-1872-2AW	2022-05-09 23:44:00	21.057	0.019	21.666	0.035	43.202	0.046	-0.286	44.243	0.104	0.423	66.959	3.994	0.466	-0.120349	0.156204
CLINO-1872-2AW	2022-05-12 16:20:00	21.007	0.025	21.387	0.052	42.877	0.073	-0.279	43.702	0.122	0.451	63.673	5.602	-2.027	-0.0857046	0.198414
CLINO-1872-2AW	2022-11-09 13:09:00	21.094	0.013	21.731	0.03	43.334	0.041	-0.26	44.045	0.141	0.105	71.569	3.466	4.624	0.0152614	0.172341
CLINO-1872-2AW	2022-11-09 16:13:00	21.111	0.013	21.768	0.022	43.4	0.049	-0.248	44.131	0.067	0.116	71.243	2.024	4.23	0.0260862	0.184189
CLINO-1872-2AW	2023-05-13 23:54:00	21.012	0.003	21.822	0.004	43.21	0.033	-0.382	44.413	0.059	0.28	22.231	2.189	-41.716	-0.102065	0.163467
CLINO-1872-2AW	2023-05-14 10:19:00	21.012	0.001	21.818	0.001	43.208	0.029	-0.38	44.416	0.09	0.291	23.201	1.11	-40.799	-0.0910911	0.1771
CLINO-1897.08-2AW	2022-05-03 21:22:00	20.985	0.029	21.483	0.055	42.937	0.07	-0.29	43.888	0.129	0.442	68.423	4.399	2.268	-0.0969889	0.184665
CLINO-1897.08-2AW	2022-05-05 16:43:00	21.058	0.019	21.604	0.036	43.143	0.047	-0.283	44.127	0.085	0.434	72.801	2.373	6.064	-0.107924	0.171342
CLINO-1897.08-2AW	2022-05-08 17:55:00	20.959	0.016	21.513	0.031	42.939	0.06	-0.291	43.929	0.129	0.423	71.344	5.028	4.978	-0.116492	0.160902
CLINO-1897.08-2AW	2022-04-29 18:50:00	20.96	0.029	21.411	0.057	42.845	0.073	-0.284	43.733	0.14	0.434	75.79	5.37	9.345	-0.103085	0.177237
CLINO-1897.08-2AW	2022-05-12 00:32:00	20.8	0.015	21.136	0.031	42.409	0.024	-0.276	43.162	0.068	0.424	65.96	5.187	0.817	-0.106073	0.173597
CLINO-1897.08-2AW	2022-11-08 11:39:00	21.074	0.017	21.692	0.049	43.286	0.103	-0.247	43.973	0.161	0.114	76.505	5.256	9.35	-0.0351449	0.208423
CLINO-1897.08-2AW	2022-11-08 14:39:00	21.1	0.044	21.745	0.096	43.39	0.169	-0.225	44.113	0.333	0.051	78.755	8.783	11.328	-0.0986197	0.140148
CLINO-1927.6202AW	2022-04-28 12:54:00	21.1	0.027	21.128	0.054	42.728	0.093	-0.265	43.178	0.119	0.457	74.742	5.337	8.763	-0.0732694	0.213565
CLINO-1927.62-2AW	2022-05-04 11:47:00	21.064	0.03	21.164	0.057	42.71	0.07	-0.282	43.215	0.129	0.421	72.045	5.271	6.199	-0.109724	0.169149
CLINO-1927.62-2AW	2022-05-07 17:38:00	21.106	0.04	20.991	0.079	42.587	0.105	-0.274	42.862	0.15	0.422	76.51	2.729	10.683	-0.104389	0.175649
Clino-1927.62-2AW	2022-05-09 14:11:00	21.086	0.013	20.985	0.027	42.559	0.026	-0.275	42.855	0.099	0.427	68.29	7.075	2.998	-0.0993026	0.181846
CLINO-1927.62-2AW	2022-11-07 15:41:00	21.248	0.018	21.375	0.042	43.128	0.097	-0.27	43.316	0.184	0.105	73	2.988	6.493	-0.0419165	0.20114
CLINO-1927.62-2AW	2022-11-07 20:11:00	21.256	0.013	21.393	0.035	43.165	0.07	-0.26	43.338	0.129	0.09	71.809	3.896	5.333	-0.0569911	0.184925
CLINO-1926.72-2AW	2023-05-13 15:19:00	21.226	0.003	21.294	0.003	42.919	0.021	-0.37	43.331	0.09	0.277	23.657	1.546	-39.62	-0.0957573	0.171303
CLINO-1926.72-2AW	2023-05-13 20:30:00	21.229	0.001	21.3	0.005	42.906	0.015	-0.392	43.334	0.118	0.269	21.324	2.036	-41.823	-0.103783	0.161333
CLINO-1977.42-2AW	2022-06-14 17:00:00	20.948	0.027	20.53	0.048	41.894	0.066	-0.336	41.814	0.106	0.32	70.478	4.138	6.078	-0.135562	0.151857
CLINO-1977.42-2AW	2022-06-13 15:45:00	20.944	0.036	20.52	0.069	41.892	0.09	-0.325	41.804	0.153	0.33	69.884	6.497	5.543	-0.125453	0.162352
CLINO-1977.42-2AW	2022-08-20 22:29:00	20.875	0.023	20.447	0.057	41.716	0.104	-0.353	41.452	0.135	0.135	66.841	4.027	2.896	-0.133962	0.165747
CLINO-1977.42-2AW	2022-11-05 14:02:00	20.931	0.011	20.546	0.03	41.934	0.081	-0.296	41.583	0.093	0.067	74.084	1.13	9.454	-0.0740386	0.166588
CLINO-1977.42-2AW	2022-11-05 17:16:00	20.938	0.014	20.563	0.037	41.963	0.097	-0.292	41.627	0.12	0.075	69.132	4.563	4.759	-0.0661879	0.175033
CLINO-1977.42-2AW	2023-05-09 06:41:00	20.987	0.005	20.593	0.009	42.059	0.029	-0.278	41.935	0.141	0.313	26.168	4.815	-35.722	-0.0684421	0.185316
CLINO-1977.42-2AW	2023-05-13 07:38:00	20.883	0.001	20.598	0.005	41.84	0.014	-0.388	41.834	0.015	0.275	19.655	1.389	-41.749	-0.0848793	0.184817
CLINO-1956.16-2AW	2022-06-17 23:16:00	21.198	0.042	20.787	0.079	42.421	0.103	-0.331	42.367	0.148	0.346	103.095	5.729	35.948	-0.115587	0.172596
CLINO-1956.16-2AW	2022-06-13 19:26:00	21.206	0.028	20.82	0.051	42.472	0.077	-0.322	42.434	0.1	0.346	66.611	4.021	1.613	-0.116317	0.171838
CLINO-1956.16-2AW	2022-11-03 11:47:00	21.177	0.018	20.835	0.051	42.498	0.103	-0.282	42.195	0.176	0.087	69.688	2.822	4.504	-0.0561144	0.185868
CLINO-1956.16-2AW	2022-11-03 15:09:00	21.18	0.012	20.848	0.037	42.525	0.087	-0.271	42.223	0.146	0.088	73.959	5.709	8.487	-0.0552093	0.186841
CLINO-1956.16-2AW	2022-11-05 20:48:00	21.237	0.017	20.91	0.04	42.649	0.082	-0.27	42.356	0.157	0.095	71.344	5.805	5.851	-0.0486604	0.193886
CLINO-1956.16-2AW	2023-05-09 14:27:00	21.153	0.002	20.74	0.006	42.267	0.021	-0.388	42.223	0.111	0.3	26.207	2.276	-36.126	-0.0840618	0.167748
CLINO-1956.16-2AW	2023-05-09 17:33:00	21.158	0.002	20.748	0.004	42.29	0.028	-0.379	42.243	0.084	0.303	26.808	1.691	-35.583	-0.0812437	0.170918
CLINO-2026.58-2AW	2022-07-22 17:19:00	21.272	0.063	20.546	0.123	42.232	0.159	-0.355	41.818	0.242	0.292	73.331	5.87	8.386	-0.0675797	0.209142
CLINO-2026.58-2AW	2022-07-24 14:30:00	21.285	0.059	20.62	0.118	42.322	0.157	-0.353	41.949	0.168	0.274	68.858	5.801	4.029	-0.0867061	0.187287
CLINO-2026.58-2AW	2022-07-26 00:17:00	21.323	0.058	20.698	0.125	42.427	0.235	-0.366	42.097	0.262	0.262	59.864	5.512	-4.611	-0.0999787	0.172122
CLINO-2026.58-2AW	2022-07-29 00:19:00	21.234	0.033	20.469	0.065	42.118	0.101	-0.352	41.647	0.179	0.279	69.945	5.065	5.394	-0.0791093	0.195968
CLINO-2026.58-2AW	2022-11-05 01:15:00	21.168	0.013	20.493	0.025	42.153	0.072	-0.275	41.525	0.099	0.114	73.444	3.168	8.704	-0.0268419	0.217354
CLINO-2026.58-2AW	2023-05-09 20:55:00	21.378	0.003	20.846	0.004	42.622	0.028	-0.377	42.473	0.045	0.333	24.581	1.901	-38.076	-0.0533358	0.202306
CL-2026.58-2AW	2023-05-12 06:51:00	21.38	0.004	20.948	0.006	42.746	0.035	-0.358	42.725	0.14	0.375	23.946	1.951	-38.863	-0.013628	0.246965
CLINO-2078-3AW	2022-04-28 18:19:00	21.638	0.017	21.415	0.035	43.568	0.065	-0.28	43.783	0.069	0.474	77.473	2.741	10.199	-0.0636994	0.225225
CLINO-2078-3AW	2022-05-03 11:18:00	21.657	0.023	21.39	0.045	43.563	0.056	-0.28	43.734	0.112	0.476	75.014	2.783	7.923	-0.0610976	0.228395
Clino-2078-3AW	2022-05-09 18:55:00	21.645	0.035	21.413	0.058	43.6	0.165	-0.255	43.753	0.309	0.45	68.8	5.858	2.069	-0.0873309	0.196432
Clino-2078-3AW	2022-05-09 18:55:00	21.645	0.034	21.413	0.058	43.597	0.163	-0.258	43.753	0.308	0.45	68.8	5.858	2.069	-0.0873309	0.196432
CLINO-2078-3AW	2022-11-04 12:51:00	21.747	0.012	21.578	0.034	43.874	0.068	-0.254	43.744	0.099	0.116	71.088	3.014	3.785	-0.0323682	0.21141
CLINO-2078-3AW	2023-05-09 23:52:00	21.798	0.005	21.67	0.008	43.881	0.037	-0.387	44.18	0.082	0.356	24.645	1.966	-39.961	-0.0458627	0.21071
CLINO-2078-3AW	2023-05-10 08:09:00	21.802	0.006	21.684	0.009	43.912	0.02	-0.375	44.205	0.092	0.351	27.293	3.29	-37.511	-0.0510901	0.204831
CLINO-2078-3AW	2023-05-10 08:09:00	21.802	0.006	21.684	0.009	43.912	0.02	-0.375	44.205	0.092	0.351	27.293	3.29	-37.511	-0.0510901	0.204831
CLINO-2102.08-3AW	2022-02-11 21:31:00	21.721	0.026	21.316	0.046	43.561	0.063	-0.275	43.507	0.091	0.404	95.648	6.88	27.347	-0.117523	0.17752
CLINO 2102.08 3AW	2022-02-15 08:08:00	21.742	0.019	21.573	0.036	43.84	0.05	-0.278	44.03	0.07	0.401	107.705	5.998	38.115	-0.126793	0.166561
CLINO-2102.08-3AW	2022-02-21 16:44:00	21.74	0.022	21.53	0.039	43.79	0.048	-0.282	43.956	0.106	0.415	90.068	7.357	21.674	-0.111906	0.184162
CLINO-2102.08-3AW	2022-02-21 22:10:00	21.767	0.027	21.588	0.049	43.848	0.067	-0.309	44.063	0.102	0.403	87.685	4.051	19.297	-0.125188	0.168458
CLINO-2102.08-3AW	2022-04-09 17:47:00	21.64	0.006	21.725	0.014	43.888	0.027	-0.274	44.437	0.048	0.493	93.915	8.184	25.001	-0.0828526	0.214202
CLINO-2102.08-3AW	2022-04-28 23:32:00	21.195	0.012	20.177	0.019	41.868	0.02	-0.271	41.196	0.086	0.417	62.278	4.919	-1.209	-0.0889284	0.194486
CLINO-2102.08-2AW	2022-05-03 15:22:00	21.158	0.025	19.971	0.048	41.636	0.063	-0.257	40.773	0.138	0.416	70.622	5.853	7.075	-0.0847335	0.199597
CLINO-2102.08-2AW	2022-11-04 00:52:00	21.362	0.016	20.456	0.031	42.32	0.059	-0.275	41.434	0.118	0.1	67.789	5.392	3.258	-0.0405333	0.202627
CLINO-2128.15-2AW	2022-06-13 11:33:00	21.563	0.031	21.38	0.064	43.427	0.088	-0.306	43.647	0.165	0.412	76.761	6.017	9.68	-0.0635321	0.226642
CLINO-2128.17-2AW	2022-11-12 14:13:00	20.45	0.049	18.985	0.101	39.863	0.169	-0.295	38.423	0.266	0.089	67.784	6.541	7.06	0.0107158	0.167365
CLINO-2128.15-2AW	2022-06-17 00:06:00	21.501	0.075	21.228	0.134	43.221	0.154	-0.295	43.301	0.243	0.378	102.862	24.449	34.529	-0.0937625	0.195255
CLINO-2128.15-2AW	2022-06-19 16:49:00	21.324	0.012	20.987	0.013	42.755	0.038	-0.33	42.805	0.121	0.375	72.941	7.452	7.11	-0.0913586	0.197751
CLINO-2128.15-2AW	2022-11-02 21:36:00	21.549	0.014	21.415	0.044	43.497	0.114	-0.258	43.418	0.179	0.125	73.356	2.2	6.435	-0.0222625	0.22228
CLINO-2128.17-2AW	2022-11-12 20:37:00	20.527	0.065	19.135	0.131	40.068	0.173	-0.321	38.73	0.225	0.089	70.844	9.602	9.571	0.0100903	0.166681
CLINO-2128.15-2AW	2023-05-15 00:10:00	21.518	0.003	21.465	0.005	43.379	0.036	-0.388	43.707	0.105	0.304	24.74	1.898	-39.212	-0.0719919	0.200828
CLINO-2128.15-2AW	2023-05-14 20:35:00	21.517	0.003	21.463	0.005	43.375	0.036	-0.389	43.677	0.08	0.279	25.111	1.657	-38.859	-0.0967338	0.17009
CLINO-2177-2AW	2022-06-12 15:13:00	21.368	0.035	21.163	0.069	42.981	0.094	-0.328	43.172	0.152	0.381	72.064	2.796	5.899	-0.089357	0.199829
CLINO-2177-2AW	2022-06-18 07:50:00	21.344	0.039	21.183	0.073	43.004	0.096	-0.3	43.227	0.117	0.395	84.253	5.4	17.323	-0.0759563	0.213742
CLINO-2177-2AW	2022-06-15 23:27:00	21.347	0.032	21.136	0.071	42.987	0.101	-0.276	43.12	0.179	0.384	82.058	2.868	15.351	-0.0857905	0.203532
CLINO-2177-2AW	2022-06-20 00:28:00	21.421	0.008	21.368	0.009	43.29	0.018	-0.282	43.604	0.042	0.395	80.695	7.541	13.542	-0.0800637	0.209478
CLINO-2177-2AW	2022-11-02 13:33:00	21.305	0.008	21.199	0.021	43.011	0.051	-0.269	42.973	0.106	0.121	65.419	4.395	-0.337	-0.0247531	0.219601
CLINO-2177-2AW	2023-05-10 13:28:00	21.378	0.003	21.284	0.006	43.086	0.028	-0.354	43.352	0.067	0.317	23.14	1.028	-40.239	-0.0773312	0.175318
CLINO-2177-2AW	2023-05-10 13:28:00	21.379	0.003	21.287	0.005	43.09	0.035	-0.352	43.388	0.048	0.347	23.363	0.911	-40.034	-0.0476586	0.208691
CLINO-1204.42	2022-08-04 00:42:00	19.847	0.044	19.083	0.089	39.312	0.116	-0.31	38.817	0.164	0.276	61.448	5.805	1.527	-0.057775	0.220345
CLINO-1204.42	2021-09-13 11:51:00	19.703	0.001	18.756	0.003	38.801	0.041	-0.34	38.363	0.113	0.481	31.914	3.384	-25.579	-0.0895374	0.241609
CLINO-1204.42	2022-08-12 00:24:00	19.829	0.047	19.016	0.1	39.211	0.14	-0.323	38.634	0.204	0.232	66.097	4.839	6.063	-0.0186775	0.27178
CLINO-1207.67	2022-08-13 09:59:00	20.796	0.053	19.361	0.11	40.583	0.165	-0.315	39.335	0.23	0.23	63.948	6.519	2.353	-0.0252259	0.265757
CLINO-1211	2022-08-10 22:32:00	21.105	0.056	19.71	0.11	41.273	0.15	-0.301	40.046	0.252	0.229	68.312	4.201	5.463	-0.0308393	0.260595
CLINO-1213.41	2022-08-04 09:49:00	20.873	0.047	19.258	0.092	40.571	0.126	-0.306	39.177	0.192	0.279	66.296	3.896	4.683	-0.0578705	0.220235
CLINO-1213.41	2021-09-18 19:43:00	20.589	0.002	18.496	0.004	39.464	0.036	-0.348	37.8	0.105	0.45	32.382	3.445	-25.551	-0.112164	0.215683
CLINO-1215	2022-08-10 17:01:00	20.689	0.035	18.737	0.068	39.881	0.126	-0.28	38.055	0.121	0.222	70.79	2.749	10.126	-0.0249206	0.266038
CLINO-1215	2021-09-12 22:47:00	20.266	0.003	17.648	0.003	38.327	0.028	-0.297	36.074	0.179	0.451	32.717	5.418	-23.309	-0.0854952	0.24624
CLINO-1215	2021-09-20 01:01:00	20.308	0.002	17.826	0.003	38.49	0.033	-0.354	36.456	0.087	0.469	30.714	3.501	-25.581	-0.0731763	0.260355
CLINO-1215	2022-08-09 13:32:00	21.167	0.041	19.753	0.104	41.459	0.2	-0.227	40.099	0.397	0.195	58.268	6.903	-4.138	-0.0651831	0.229007
CLINO-1226.67	2022-08-13 15:43:00	20.828	0.03	18.967	0.067	40.21	0.11	-0.327	38.503	0.121	0.202	62.086	4.142	1.325	-0.0478275	0.24497
CLINO-1231.85	2022-08-12 07:21:00	20.716	0.027	18.814	0.057	39.939	0.09	-0.326	38.214	0.116	0.224	63.434	5.589	3.01	-0.0239523	0.266929
CLINO-1231.85	2021-09-17 03:06:00	20.089	0.002	17.076	0.004	37.559	0.034	-0.305	34.897	0.119	0.44	32.758	2.837	-22.01	-0.0789908	0.253693
CLINO-1243.08	2021-09-17 20:48:00	21.153	0.004	19.448	0.003	41.035	0.045	-0.325	39.82	0.118	0.525	33.757	4.244	-26.617	-0.067206	0.267196
CLINO-1243.08	2022-08-03 21:02:00	21.25	0.047	19.774	0.092	41.485	0.137	-0.306	40.266	0.187	0.314	63.973	4.472	1.104	-0.0322345	0.249527
CLINO-1243.08	2022-08-11 06:59:00	21.225	0.045	19.694	0.089	41.382	0.126	-0.303	40.019	0.137	0.234	69.208	5.374	6.211	-0.0256641	0.265354
CLINO-1243.08	2022-08-14 00:58:00	21.04	0.022	19.298	0.049	40.763	0.079	-0.329	39.165	0.1	0.189	62.343	4.876	0.706	-0.0651229	0.229062
CLINO-1783.25	2022-08-02 19:08:00	20.392	0.082	19.389	0.162	40.228	0.222	-0.275	39.435	0.334	0.27	66.528	3.748	5.153	-0.069089	0.207417
CLINO-1796.8	2022-08-02 23:50:00	20.639	0.004	20.602	0.012	41.641	0.045	-0.337	41.913	0.158	0.273	59.017	8.962	-4.512	-0.0873965	0.186499
CLINO-1872	2022-08-03 10:06:00	20.419	0.003	19.357	0.02	40.183	0.05	-0.314	39.355	0.128	0.257	58.999	3.315	-1.908	-0.0814011	0.193349
CLINO-1885.42	2022-08-01 08:50:00	20.142	0.021	18.945	0.056	39.437	0.091	-0.355	38.546	0.174	0.286	61.063	10.293	1.121	-0.0454448	0.234433
CLINO-1897.08	2022-07-31 10:05:00	20.121	0.044	19.04	0.09	39.515	0.131	-0.349	38.691	0.177	0.241	65.278	6.494	4.937	-0.0916916	0.181591
CLINO-1927.62	2021-09-13 21:57:00	19.795	0.002	17.401	0.003	37.602	0.005	-0.28	35.54	0.072	0.421	32.667	5.536	-22.409	-0.107554	0.220966
CLINO-1927.62	2022-08-01 21:57:00	20.288	0.008	18.828	0.032	39.475	0.085	-0.353	38.288	0.114	0.266	51.508	4	-7.822	-0.0632263	0.214116
CLINO-1956.16	2022-08-02 09:41:00	20.699	0.062	19.515	0.12	40.667	0.174	-0.285	39.714	0.205	0.291	71.231	3.027	9.017	-0.050488	0.228671
CLINO-1956.16	2022-08-21 10:09:00	21.249	0.013	20.981	0.032	42.672	0.064	-0.329	42.637	0.157	0.225	68.237	5.471	2.783	-0.051651	0.241453
CLINO-1977.42	2022-07-30 11:23:00	20.133	0.064	18.755	0.127	39.25	0.178	-0.342	38.101	0.233	0.231	65.748	2.22	5.92	-0.0966184	0.175962
CLINO-2026.58	2022-07-28 18:32:00	20.583	0.045	18.867	0.09	39.895	0.133	-0.285	38.367	0.161	0.267	70.292	7.753	9.516	-0.0629056	0.214482
CLINO-2026.58	2022-07-29 17:38:00	20.557	0.086	18.814	0.17	39.822	0.235	-0.279	38.251	0.337	0.259	68.224	4.272	7.694	-0.0699082	0.206481
CLINO-2026.58	2022-08-21 20:08:00	20.657	0.017	19.116	0.041	40.187	0.059	-0.32	38.785	0.024	0.18	62.514	1.666	1.62	-0.0716572	0.223052
CLINO-2078	2022-07-29 23:29:00	20.387	0.054	18.531	0.107	39.265	0.149	-0.368	37.69	0.208	0.274	66.027	4.421	6.35	-0.0500843	0.229132
CLINO-2078	2022-08-16 07:51:00	20.383	0.031	18.668	0.069	39.444	0.115	-0.325	37.868	0.142	0.177	63.474	4.1	3.68	-0.0687073	0.225765
CLINO-2102.08	2022-07-31 22:46:00	20.304	0.026	18.24	0.066	38.91	0.097	-0.346	37.061	0.138	0.239	56.578	8.468	-1.925	-0.0796757	0.19532
CLINO-2102.08	2022-08-16 00:14:00	20.417	0.018	18.459	0.046	39.258	0.079	-0.335	37.439	0.126	0.174	60.163	2.905	0.923	-0.0689237	0.225566
CLINO-2128.17	2022-08-19 07:33:00	20.411	0.026	18.9	0.054	39.719	0.105	-0.311	38.375	0.165	0.211	53.865	6.392	-5.863	-0.0379969	0.254011
CLINO-2128.15	2022-08-22 00:22:00	20.391	0.012	18.85	0.031	39.603	0.062	-0.355	38.268	0.155	0.206	62.696	4.291	2.585	-0.0423027	0.250051
CLINO-2177	2022-07-31 01:25:00	20.127	0.067	18.902	0.13	39.439	0.183	-0.295	38.458	0.267	0.287	66.986	4.14	6.81	-0.0436881	0.23644
CLINO-2177	2022-08-15 16:56:00	20.152	0.02	18.928	0.045	39.472	0.07	-0.315	38.379	0.092	0.158	65.611	2.178	5.435	-0.0910229	0.20524
SS-182.6	2022-07-19 00:07:00	20.01	0.05	19.926	0.102	40.282	0.126	-0.354	40.56	0.192	0.3	55.617	5.765	-5.76	-0.0487625	0.230642
SS-182.6	2022-07-16 17:43:00	19.997	0.052	19.849	0.125	40.193	0.211	-0.353	40.428	0.298	0.323	58.729	8.277	-2.672	-0.0246275	0.258219
SS-182.6	2022-07-19 00:07:00	20.01	0.05	19.926	0.102	40.282	0.126	-0.354	40.56	0.192	0.3	55.617	5.765	-5.76	-0.0487625	0.230642
SS182.6	2023-04-30 12:01:00	20.086	0.001	19.992	0.004	40.485	0.012	-0.3	40.774	0.108	0.375	25.891	1.083	-33.959	0.00411838	0.266924
SS182.6	2023-04-30 19:35:00	20.092	0.002	20	0.004	40.54	0.029	-0.26	40.766	0.174	0.353	26.692	2.497	-33.224	-0.0178089	0.242262
SS182.6	2023-05-04 20:43:00	20.075	0.003	19.85	0.002	40.357	0.033	-0.275	40.446	0.05	0.339	24.58	1.521	-34.917	-0.0288981	0.22979
SS182.6	2023-05-05 00:19:00	20.077	0.001	19.857	0.002	40.337	0.007	-0.302	40.48	0.072	0.358	23.699	1.43	-35.762	-0.0102074	0.250812
SS186.6	2022-02-13 08:56:00	20.077	0.004	20.435	0.008	40.944	0.013	-0.275	41.749	0.084	0.443	86.88	20.031	22.611	-0.05745	0.248545
SS-186.6	2022-02-18 23:18:00	20.025	0.025	20.364	0.047	40.826	0.056	-0.268	41.602	0.126	0.441	91.684	6.04	27.327	-0.0576879	0.248263
SS-186.6	2022-02-20 12:25:00	19.977	0.02	20.186	0.04	40.595	0.053	-0.27	41.244	0.057	0.447	83.721	6.463	20.235	-0.0473965	0.260431
SS-186.6	2022-02-20 18:05:00	20.043	0.026	20.345	0.051	40.799	0.059	-0.294	41.567	0.133	0.445	85.066	5.934	21.116	-0.0532684	0.253489
SS-186.6	2021-09-24 13:39:00	19.516	0.003	18.856	0.004	38.689	0.035	-0.355	38.589	0.125	0.502	33.488	5.92	-24.09	-0.0718985	0.261819
SS-186.6	2022-04-15 00:12:00	19.938	0.017	20.304	0.031	40.677	0.035	-0.265	41.516	0.128	0.476	72	6.418	9.01	-0.0619998	0.240933
SS-186.6	2021-09-24 10:22:00	19.881	0.001	19.807	0.002	40.047	0.057	-0.336	40.529	0.08	0.502	30.446	2.183	-29.116	-0.10075	0.228761
SS-187.3	2022-04-11 00:03:00	20.055	0.013	20.442	0.024	40.919	0.032	-0.284	41.81	0.064	0.488	78.323	7.943	14.569	-0.0538097	0.251432
SS-187.3	2022-04-12 00:26:00	19.989	0.012	20.501	0.022	40.905	0.027	-0.289	41.923	0.096	0.48	74.214	5.792	10.657	-0.0632741	0.2393
SS-187.3	2022-05-13 18:43:00	19.966	0.011	20.785	0.027	41.166	0.046	-0.288	42.509	0.085	0.486	65.689	1.341	2.113	-0.0360534	0.258909
SS-187.3	2021-09-23 10:05:00	19.55	0.003	18.833	0.004	38.737	0.034	-0.321	38.541	0.155	0.502	34.04	2.808	-23.56	-0.0711846	0.262637
SS187.3	2023-05-03 19:20:00	20.128	0.002	20.728	0.004	41.251	0.019	-0.315	42.287	0.124	0.385	22.618	0.621	-38.446	0.000356085	0.262692
SS187.3	2023-05-03 21:53:00	20.13	0.002	20.735	0.004	41.229	0.046	-0.344	42.283	0.107	0.368	22.881	2.048	-38.212	-0.0166075	0.243613
SS187.3	2023-05-05 09:31:00	20.09	0.003	20.563	0.006	41.064	0.03	-0.297	41.926	0.042	0.363	24.066	2.161	-36.74	-0.0183602	0.241642
SS187.3	2023-05-05 13:12:00	20.092	0.004	20.569	0.008	41.074	0.041	-0.296	41.957	0.159	0.38	24.538	3.861	-36.309	-0.00164222	0.260445
SS-192.3	2021-09-23 20:20:00	19.407	0.002	19.781	0.007	39.528	0.044	-0.329	40.482	0.118	0.508	31.382	6.122	-27.702	-0.0940513	0.236437
SS-192.3	2022-07-17 21:08:00	19.806	0.056	21.002	0.108	41.209	0.147	-0.293	42.787	0.188	0.328	70.32	3.839	6.216	-0.0399118	0.240755
SS-192.3	2022-07-21 00:43:00	19.683	0.06	20.772	0.118	40.78	0.176	-0.36	42.32	0.222	0.33	67.251	4.485	3.903	-0.0338962	0.247629
SS-192.3	2022-08-19 18:45:00	19.817	0.007	21.036	0.023	41.208	0.043	-0.337	42.753	0.053	0.229	70.903	4.182	6.687	-0.0484037	0.24444
SS-192.3	2023-05-02 14:44:00	19.365	0.004	20.423	0.006	40.197	0.044	-0.261	41.657	0.09	0.379	26.515	3.285	-33.443	8.65853e-05	0.262389
SS-192.3	2021-10-04 00:49:00	19.303	0.003	20.407	0.009	40.03	0.032	-0.344	41.607	0.108	0.362	31.218	3.479	-28.922	-0.0164586	0.243781
SS-192.3	2023-05-02 18:25:00	19.372	0.004	20.436	0.005	40.23	0.038	-0.249	41.682	0.128	0.377	29.003	2.601	-31.131	-0.00214082	0.259884
SS192.3	2023-05-04 15:48:00	19.742	0.003	20.799	0.002	40.918	0.047	-0.312	42.407	0.07	0.36	24.472	2.293	-36.445	-0.0257354	0.233347
SS-193.5	2021-09-23 03:22:00	19.713	0.004	19.474	0.005	39.554	0.032	-0.318	39.844	0.151	0.497	32.494	4.458	-26.39	-0.0955629	0.234705
SS-193.5	2022-07-20 00:55:00	20.134	0.059	20.997	0.125	41.554	0.167	-0.289	42.781	0.223	0.332	72.108	4.504	7.561	-0.0358602	0.245385
SS-193.5	2022-07-17 00:38:00	20.041	0.061	20.782	0.118	41.242	0.159	-0.288	42.349	0.203	0.338	74.542	4.133	10.365	-0.0261456	0.256485
SS-193.5	2022-07-17 00:38:00	20.043	0.058	20.788	0.111	41.243	0.149	-0.294	42.347	0.19	0.326	74.364	3.903	10.185	-0.0381284	0.242793
SS-193.5	2022-08-20 01:06:00	20.101	0.016	20.955	0.044	41.423	0.068	-0.341	42.584	0.118	0.226	65.726	3.671	1.679	-0.0503071	0.242689
SS193.5	2023-05-03 12:16:00	20.05	0.001	20.765	0.004	41.273	0.016	-0.251	42.36	0.077	0.382	27.466	2.101	-33.878	-0.00330793	0.258571
SS193.5	2023-05-03 15:21:00	20.051	0.002	20.766	0.003	41.259	0.02	-0.266	42.362	0.093	0.382	27.491	1.203	-33.857	-0.00332612	0.258551
SS-198.5	2021-09-22 23:35:00	19.465	0.002	19.894	0.006	39.684	0.04	-0.346	40.716	0.124	0.511	33.11	3.39	-26.343	-0.0945314	0.239883
SS-198.5	2022-07-18 00:23:00	19.661	0.04	20.878	0.079	40.877	0.111	-0.346	42.548	0.181	0.342	65.235	3.762	1.827	-0.0238567	0.2591
SS-198.5	2022-07-21 16:03:00	19.677	0.047	20.915	0.09	41.004	0.108	-0.276	42.633	0.163	0.35	71.231	5.642	7.377	-0.0165876	0.267406
SS198.5	2023-05-02 22:27:00	19.759	0.003	20.94	0.002	41.098	0.019	-0.293	42.698	0.077	0.365	25.451	1.575	-35.803	-0.0233824	0.235994
SS198.5	2023-05-05 16:35:00	19.73	0.001	21.029	0	41.144	0.009	-0.304	42.898	0.057	0.381	24.164	1.108	-37.149	-0.00920159	0.251943
SS198.5	2023-05-05 21:03:00	19.735	0.002	21.044	0.004	41.187	0.04	-0.283	42.91	0.029	0.364	25.896	3.939	-35.553	-0.0263107	0.2327
SS205	2022-02-13 13:10:00	20.025	0.02	21.199	0.037	41.634	0.042	-0.296	43.346	0.085	0.479	92.591	6.254	26.529	-0.0405935	0.268474
SS-205	2021-09-23 23:40:00	19.696	0.003	20.329	0.005	40.354	0.05	-0.355	41.621	0.091	0.528	33.27	3.421	-27.243	-0.0909906	0.239944
SS-205	2021-09-26 17:22:00	19.629	0	20.137	0.003	40.143	0.038	-0.305	41.217	0.005	0.516	37.731	7.116	-22.614	-0.0969823	0.233078
SS-205	2022-02-18 15:14:00	19.941	0.027	21.02	0.046	41.373	0.066	-0.289	42.946	0.121	0.446	88.817	5.467	23.427	-0.0687986	0.235127
SS-205	2022-05-13 09:07:00	19.696	0.018	20.58	0.037	40.655	0.051	-0.308	42.049	0.1	0.448	73.127	4.96	9.791	-0.0684041	0.219493
SS-205	2021-09-23 23:40:00	19.696	0.003	20.329	0.005	40.354	0.05	-0.355	41.621	0.091	0.528	33.27	3.421	-27.243	-0.0909906	0.239944
SS-205	2021-09-26 17:22:00	19.629	0	20.137	0.003	40.143	0.038	-0.305	41.217	0.005	0.516	37.731	7.116	-22.614	-0.0969823	0.233078
SS205	2023-05-01 19:59:00	19.97	0.002	20.923	0.004	41.319	0.022	-0.278	42.674	0.077	0.374	25.011	2.131	-36.398	-0.0141641	0.246362
SS-212.9	2021-09-24 02:53:00	19.701	0.001	20.049	0.002	40.083	0.017	-0.352	41.039	0.137	0.517	31.727	0.831	-28.178	-0.0933351	0.237257
SS-212.9	2022-07-15 22:39:00	20.035	0.07	21.19	0.139	41.54	0.188	-0.388	43.174	0.244	0.331	77.637	5.475	12.487	-0.0402395	0.240381
SS-212.9	2022-07-18 18:46:00	20.185	0.059	20.93	0.112	41.56	0.171	-0.27	42.658	0.154	0.345	58.43	4.582	-5.216	-0.0218026	0.261447
SS212.9	2023-05-01 06:51:00	20.002	0.003	21.103	0.005	41.537	0.016	-0.273	43.056	0.076	0.389	30.387	2.203	-31.71	-0.00263876	0.259324
SS212.9	2023-05-01 10:18:00	19.987	0.003	21.069	0.004	41.446	0.046	-0.313	42.95	0.048	0.354	22.943	1.897	-38.628	-0.0366746	0.221044
SS212.9	2023-05-05 23:59:00	20.05	0.002	21.227	0.004	41.694	0.029	-0.291	43.309	0.083	0.387	24.77	1.421	-37.269	-0.00694006	0.254486
DCMIX00	2022-06-22 22:29:00	19.438	0.027	14.857	0.057	34.402	0.071	-0.546	30.114	0.119	0.175	67.329	2.784	15.766	-0.153091	0.133657
DCMIX-00	2022-06-26 02:24:00	19.416	0.054	14.649	0.104	34.181	0.138	-0.536	29.681	0.213	0.164	69.731	5.034	18.485	-0.159373	0.127134
DCMIX00	2022-06-27 01:09:00	19.368	0.025	14.501	0.038	34.001	0.062	-0.52	29.403	0.069	0.184	57.063	3.569	6.761	-0.136344	0.151044
DCMIX-00	2022-07-03 00:37:00	19.435	0.049	14.802	0.094	34.345	0.12	-0.545	30.015	0.163	0.186	62.559	5.817	11.337	-0.141012	0.146198
DCMIX00	2022-08-17 10:24:00	19.511	0.03	14.899	0.068	34.512	0.109	-0.555	30.074	0.173	0.052	53.762	4.803	2.695	-0.143136	0.157309
DCMIX00	2023-04-26 07:37:00	19.472	0.002	14.928	0.005	34.559	0.03	-0.499	30.245	0.181	0.16	24.553	2.73	-25.114	-0.115109	0.132829
DCMIX-00	2023-04-26 18:32:00	19.511	0.001	14.997	0.002	34.626	0.032	-0.539	30.424	0.103	0.2	22.586	2.656	-27.154	-0.0767377	0.175986
DCMIX0	2022-06-24 14:23:00	19.373	0.048	13.135	0.094	32.669	0.146	-0.488	26.617	0.187	0.172	58.224	3.017	10.536	-0.117991	0.170099
DCMIX0	2022-07-01 01:33:00	19.551	0.046	13.284	0.089	32.942	0.127	-0.549	26.907	0.201	0.158	58.463	5.41	10.281	-0.135151	0.152283
DCMIX-0	2022-07-02 18:59:00	19.504	0.075	13.26	0.141	32.88	0.194	-0.538	26.861	0.297	0.161	59.663	5.267	11.525	-0.131649	0.155919
DCMIX-0	2022-07-23 01:59:00	19.545	0.038	13.353	0.087	33.038	0.124	-0.516	27.032	0.175	0.145	52.062	4.471	4.045	-0.0874396	0.186449
DCMIX0	2022-08-16 21:50:00	19.592	0.043	13.477	0.101	33.22	0.133	-0.508	27.172	0.161	0.035	49.95	6.985	1.738	-0.141306	0.158992
DCMIX-0	2023-04-26 23:22:00	19.485	0.003	13.541	0.003	33.202	0.02	-0.48	27.419	0.037	0.151	19.004	1.849	-27.798	-0.0984041	0.151618
DCMIX-0	2023-04-30 00:32:00	19.571	0.003	13.388	0.006	33.085	0.036	-0.531	27.092	0.049	0.133	19.19	2.973	-27.42	-0.11343	0.134718
DCMIX1	2022-06-20 18:22:00	19.59	0.011	11.903	0.014	31.74	0.03	-0.412	24.105	0.092	0.154	55.439	8.225	10.058	-0.108623	0.179826
DCMIX-1	2022-06-25 15:56:00	19.509	0.02	11.938	0.041	31.679	0.059	-0.423	24.172	0.051	0.151	62.115	5.005	16.464	-0.112353	0.175953
DCMIX1	2022-06-27 20:02:00	19.498	0.027	11.677	0.037	31.394	0.037	-0.435	23.647	0.116	0.154	50.71	9.492	6.07	-0.103633	0.185007
DCMIX1	2022-07-01 16:06:00	19.574	0.044	11.91	0.085	31.664	0.122	-0.477	24.119	0.141	0.153	58.696	4.134	13.177	-0.109775	0.178629
DCMIX-1	2022-07-11 15:42:00	19.521	0.055	11.89	0.103	31.587	0.145	-0.477	24.058	0.214	0.134	50.435	3.085	5.367	-0.0728671	0.2031
DCMIX-1	2022-08-17 17:53:00	19.584	0.032	11.856	0.077	31.658	0.104	-0.441	23.916	0.107	0.062	46.029	2.811	1.149	-0.0931794	0.203257
DCMIX-1	2023-04-27 14:55:00	19.567	0.003	12.089	0.004	31.873	0.024	-0.441	24.478	0.08	0.151	15.401	2.125	-28.586	-0.0716527	0.181705
DCMIX-1	2023-04-27 18:09:00	19.572	0.001	12.094	0.003	31.884	0.028	-0.439	24.517	0.046	0.178	18.801	1.204	-25.348	-0.0450074	0.211672
DCMIX-2	2022-06-25 19:12:00	19.458	0.053	12.447	0.103	32.11	0.143	-0.448	25.207	0.194	0.155	64.667	4.072	17.954	-0.119629	0.168399
DCMIX-2	2022-07-02 00:12:00	19.543	0.037	12.497	0.065	32.193	0.077	-0.502	25.326	0.164	0.172	45.459	11.615	-0.598	-0.103926	0.184703
DCMIX-2	2022-07-22 22:38:00	19.525	0.057	12.401	0.108	32.085	0.146	-0.495	25.066	0.206	0.109	53.373	4.421	7.175	-0.106535	0.164631
DCMIX-2	2022-08-18 07:11:00	19.533	0.013	12.659	0.029	32.341	0.073	-0.506	25.534	0.03	0.054	52.003	3.97	5.353	-0.111678	0.186243
DCMIX-2	2023-04-27 21:45:00	19.571	0.002	12.907	0.003	32.677	0.017	-0.459	26.118	0.046	0.135	18.048	0.718	-27.601	-0.10257	0.146932
DCMIX-2	2023-04-28 17:32:00	19.577	0.002	12.394	0.003	32.199	0.024	-0.431	25.079	0.084	0.134	18.12	1.593	-26.571	-0.0941194	0.156437
DCMIX-2	2023-04-28 23:06:00	19.582	0.004	12.404	0.006	32.211	0.031	-0.434	25.094	0.137	0.129	19.758	3.38	-25.03	-0.0992558	0.15066
DCMIX6	2022-06-24 18:16:00	19.524	0.024	12.073	0.051	31.825	0.062	-0.428	24.459	0.146	0.163	54.538	4.419	8.931	-0.10348	0.185166
DCMIX6	2022-06-28 02:00:00	19.621	0.029	12.191	0.044	32.068	0.056	-0.405	24.721	0.103	0.186	86.818	4.115	39.473	-0.0833342	0.206082
DCMIX-6	2022-07-03 08:20:00	19.618	0.06	12.501	0.115	32.287	0.155	-0.492	25.333	0.2	0.17	102.812	7.316	54.137	-0.106002	0.182547
DCMIX-6	2022-07-12 01:02:00	19.528	0.045	12.044	0.086	31.748	0.123	-0.479	24.389	0.174	0.152	51.168	3.551	5.76	-0.0577132	0.220415
DCMIX-6	2022-08-18 00:07:00	19.573	0.01	12.228	0.022	31.982	0.03	-0.476	24.689	0.065	0.082	46.624	2.114	1.008	-0.0781951	0.217039
DCMIX-6	2023-04-28 12:00:00	19.463	0.007	12.106	0.011	31.807	0.039	-0.416	24.559	0.071	0.196	21.891	3.505	-22.304	-0.0273895	0.231487
DCMIX-6	2023-04-29 14:15:00	19.595	0.004	12.072	0.004	31.909	0.021	-0.417	24.426	0.09	0.134	18.243	2.677	-25.864	-0.0881797	0.163117
DCMIX-6	2023-04-29 21:12:00	19.596	0.003	12.078	0.004	31.907	0.034	-0.427	24.46	0.138	0.154	17.951	3.755	-26.157	-0.0684889	0.185263
NIST-88b	2022-06-21 00:02:00	19.568	0.044	11.107	0.085	30.911	0.107	-0.42	22.489	0.138	0.148	53.351	6.804	9.643	-0.0970167	0.191876
NIST-88B	2022-06-27 16:07:00	19.531	0.028	11.032	0.042	30.842	0.049	-0.377	22.337	0.118	0.148	45.07	7.358	1.889	-0.0953606	0.193596
NIST-88B	2022-07-17 17:17:00	19.518	0.048	11.144	0.094	30.888	0.141	-0.428	22.545	0.131	0.13	42.919	3.882	-0.377	-0.0638573	0.213395
NIST-88B	2022-07-22 00:42:00	19.513	0.048	11.026	0.101	30.734	0.147	-0.456	22.294	0.22	0.118	36.921	5.785	-5.893	-0.073699	0.20215
NIST-88B	2022-08-16 15:01:00	19.622	0.023	11.214	0.047	31.08	0.065	-0.415	22.584	0.131	0.029	45.47	4.862	1.822	-0.117537	0.180854
NIST-88b	2023-04-08 13:58:00	19.532	0.004	11.154	0.008	30.929	0.041	-0.412	22.556	0.2	0.121	16.89	3.967	-25.358	-0.0841701	0.167627
NIST-88b	2023-03-24 08:43:00	19.43	0.002	10.996	0.003	30.677	0.03	-0.4	22.259	0.114	0.143	46.422	3.524	3.362	-0.0594686	0.195408
NIST-88b	2023-04-05 11:55:00	19.521	0.002	11.378	0.004	31.163	0.024	-0.391	23.049	0.125	0.16	26.817	2.33	-16.261	-0.0496544	0.206446
CARARRA	2022-06-01	19.343	0.026	15.276	0.044	34.755	0.052	-0.515	30.994	0.117	0.203	48.108	7.857	-3.237	-0.134678	0.152774
CARARRA	2022-11-01	19.403	0.022	15.48	0.047	34.932	0.052	-0.602	31.394	0.115	0.188	57.969	5.976	5.682	-0.154036	0.132675
CARARRA	2022-01-02	19.44	0.034	15.731	0.064	35.248	0.073	-0.576	32.009	0.179	0.29	66.717	7.474	13.466	-0.103103	0.177216
CARARRA	02/19/2022	19.335	0.028	15.386	0.052	34.805	0.068	-0.565	31.251	0.122	0.236	56.405	4.185	4.449	-0.147794	0.122764
CARARRA	02/23/2022	19.416	0.003	15.54	0.005	35.073	0.028	-0.537	31.505	0.06	0.178	23.082	3.193	-27.608	-0.10857	0.140184
CARARRA	2022-02-03	19.416	0.003	15.54	0.005	35.073	0.028	-0.537	31.505	0.06	0.178	23.082	3.193	-27.608	-0.10857	0.140184
CARRARA	2022-06-03	19.526	0.001	15.875	0.005	35.511	0.027	-0.55	32.16	0.098	0.154	23.404	1.147	-28.043	-0.138528	0.10649
CARARRA	03/15/2022	19.385	0.026	15.292	0.046	34.838	0.081	-0.493	31.013	0.148	0.189	58.682	4.656	6.744	-0.191871	0.0690606
CARARRA	03/23/2022	19.339	0.006	15.4	0.011	34.865	0.029	-0.525	31.378	0.041	0.33	81.642	5.241	28.412	-0.076623	0.222188
CARRARA	03/29/2022	19.4	0.031	15.583	0.052	35.158	0.064	-0.479	31.774	0.112	0.355	157.874	4.425	100.433	-0.0258786	0.285871
CARARRA	04/26/2022	19.402	0.029	15.599	0.055	35.072	0.063	-0.58	31.705	0.131	0.257	78.928	7.839	25.369	-0.123051	0.170985
carrara	2022-02-05	19.316	0.005	15.334	0.008	34.715	0.025	-0.582	31.08	0.101	0.171	54.022	5.014	2.304	-0.0878808	0.212567
carrara	2022-09-05	19.421	0.005	15.532	0.01	35.062	0.019	-0.545	31.474	0.093	0.164	61.687	23.357	9.095	-0.0981626	0.200411
CARARRA	04/29/2023	19.187	0.006	15.261	0.002	34.583	0.015	-0.508	30.869	0.195	0.11	48.146	6.508	-3.008	-0.147123	0.16023
CARRARA	06/16/2022	19.328	0.003	15.486	0.002	34.927	0.011	-0.536	31.345	0.03	0.129	46.64	2.561	-5.021	-0.132088	0.175289

## Sheet: Table S8 ETH D47
Sample	Run ID	Date	δ13C	sd	se	δ18O	sd	se	δ45CO2	sd	se	δ46CO2	sd	se	δ47CO2	sd	se	δ48CO2	sd	se	δ49CO2	sd	se	Δ47 CO2	sd	se	Δ48 CO2	sd	se	Δ49 CO2	sd	se	Heated Slope	25C Slope	50C Slope	Slope Average	heated Intercept	25C intercept	50C intercept	ETF Slope	ETF Intercept	D47 SGvsWG	Δ47 (CDES) (‰)	Δ47 (ICDES) (‰)	Relative time	residuals CDES	residuals ICDES
P4866	ETH-1	2021-07-30	1.43629	0.00990576	0.00103841	-3.67527	0.0152845	0.00160225	18.8314	0.00990576	0.00103841	13.3552	0.0152845	0.00160225	32.0732	0.118152	0.0124543	25.8956	0.543503	0.0572903	20.6804	8.58816	0.905272	-0.722398	0.117493	0.0123167	-0.966954	0.540475	0.0566572	-25.1646	8.54032	0.895268	-0.00240034	-0.00161619	-0.00158414	-0.00186689	-0.861903	-0.0212352	-0.129189	1.06647	0.945464	-0.66252	0.238907	0.236914	29	0.0337072	0.031714
P4886	ETH-1	2021-08-06	1.94273	0.00751241	0.000861733	-2.06276	0.015371	0.00176317	19.3695	0.00751241	0.000861733	14.9817	0.015371	0.00176317	34.2293	0.142621	0.0164685	28.6636	0.464341	0.0536175	11.4519	6.60149	0.762275	-0.756959	0.141667	0.0162504	-1.47942	0.461235	0.0529073	-37.56	6.55733	0.752178	-0.00240034	-0.00161619	-0.00158414	-0.00186689	-0.861903	-0.0212352	-0.129189	1.06647	0.945464	-0.693056	0.206342	0.193454	36	0.00114165	-0.0117459
P4949	ETH-1	2021-08-30	1.84901	0.00942784	0.000988307	-2.71842	0.0132121	0.001385	19.2574	0.00942784	0.000988307	14.3206	0.0132121	0.001385	33.4567	0.121514	0.0128087	27.4157	0.571699	0.0602624	7.35927	6.09531	0.642503	-0.750287	0.120837	0.0126672	-1.3903	0.568514	0.0595965	-40.1138	6.06136	0.635403	-0.00240034	-0.00161619	-0.00158414	-0.00186689	-0.861903	-0.0212352	-0.129189	1.06647	0.945464	-0.687827	0.211919	0.234587	60	0.00671884	0.029387
P4998	ETH-1	2021-09-13	1.87301	0.00853437	0.000894645	-2.49378	0.0138645	0.00145339	19.2881	0.00853437	0.000894645	14.5471	0.0138645	0.00145339	33.7149	0.132849	0.0140035	27.8287	0.500713	0.0527798	1.43329	7.30562	0.77008	-0.750995	0.132109	0.0138488	-1.43488	0.497923	0.0521965	-46.2097	7.26492	0.761571	-0.00231954	-0.00185654	-0.00175255	-0.00197621	-0.865114	-0.0107922	-0.131801	1.05516	0.940023	-0.684367	0.217907	0.203597	74	0.0127067	-0.00160339
P5033	ETH-1	2021-09-20	1.87216	0.00866096	0.000907915	-2.44228	0.0119522	0.00125293	19.2891	0.00866096	0.000907915	14.599	0.0119522	0.00125293	33.7729	0.118742	0.0125165	29.1174	0.578372	0.0609657	28.9483	10.9128	1.15031	-0.746215	0.11808	0.0123782	-0.285206	0.575149	0.060292	-20.1032	10.852	1.13759	-0.00231954	-0.00185654	-0.00175255	-0.00197621	-0.865114	-0.0107922	-0.131801	1.05516	0.940023	-0.679472	0.223072	0.228926	81	0.0178716	0.0237264
P5124	ETH-1	2021-10-14	1.48091	0.00749908	0.000786118	-3.4532	0.0114471	0.00119999	18.8816	0.00749908	0.000786118	13.5791	0.0114471	0.00119999	32.3253	0.10294	0.0108509	27.4547	0.915438	0.0964957	36.9261	15.8757	1.67345	-0.74627	0.102367	0.0107309	0.109204	0.910338	0.0954294	-10.1306	15.7873	1.65496	-0.00231954	-0.00185654	-0.00175255	-0.00197621	-0.865114	-0.0107922	-0.131801	1.05516	0.940023	-0.682388	0.219995	0.215748	105	0.014795	0.0105482
P5449	ETH-1	2021-12-28	1.96227	0.00842169	0.000882833	-1.94619	0.0212619	0.00222885	19.3921	0.00842169	0.000882833	15.0993	0.0212619	0.00222885	34.4754	0.12781	0.0134724	29.7236	0.479267	0.0505191	26.4317	9.05765	0.954761	-0.655892	0.127098	0.0133235	-0.682042	0.476597	0.0499609	-23.5515	9.00719	0.94421	-0.000630862	-0.000820652	-0.000590289	-0.000680601	-0.845293	-0.000961318	-0.110533	1.06245	0.924438	-0.632428	0.252516	0.218022	180	0.0473162	0.0128218
P5466	ETH-1	2022-01-01	1.85035	0.00940503	0.000985915	-2.24916	0.0178508	0.00187127	19.2751	0.00940503	0.000985915	14.7936	0.0178508	0.00187127	34.0312	0.132527	0.0139696	29.1271	0.473187	0.0498783	25.6552	9.41322	0.992241	-0.670897	0.131789	0.0138152	-0.659219	0.470551	0.0493272	-23.5932	9.36078	0.981277	-0.000630862	-0.000820652	-0.000590289	-0.000680601	-0.845293	-0.000961318	-0.110533	1.06245	0.924438	-0.647735	0.236253	0.199801	184	0.031053	-0.00539889
P5521	ETH-1	2022-01-12	2.00546	0.00867674	0.000909569	-2.17201	0.0144763	0.00151753	19.4253	0.00867674	0.000909569	14.8717	0.0144763	0.00151753	34.2112	0.128882	0.0135854	29.5206	0.48263	0.0508736	38.9008	14.1116	1.4875	-0.724475	0.128164	0.0134353	-0.430915	0.479941	0.0503115	-11.2884	14.033	1.47106	-0.00064187	-0.000686345	-0.00052657	-0.000618262	-0.852818	0.000561792	-0.110696	1.05145	0.923091	-0.703323	0.183582	0.178602	195	-0.0216183	-0.026598
P5568_20volts	ETH-1	2022-01-25	2.0468	0.102112	0.00758994	-1.54339	1.48482	0.110366	19.4866	0.102112	0.00758994	15.5055	1.48482	0.110366	31.5217	5.59657	0.35116	32.1715	3.17879	0.199455	29.087	15.6602	0.982611	-0.656352	1.716	0.127549	-0.523067	2.61024	0.194018	-18.8867	16.6306	1.23614	-0.00064187	-0.000686345	-0.00052657	-0.000618262	-0.852818	0.000561792	-0.110696	1.05145	0.923091	-0.636863	0.253461	0.242766	208	0.0482613	0.0375659
P5612	ETH-1	2022-02-09	2.16787	0.0139197	0.00145918	-1.95488	0.0339986	0.00356402	19.5873	0.0139197	0.00145918	15.0909	0.0339986	0.00356402	34.6106	0.114645	0.0120847	31.8845	0.35404	0.0373191	23.1188	9.12451	0.961807	-0.71464	0.114006	0.0119511	1.43152	0.352068	0.0369067	-26.886	9.07367	0.951179	-0.000416868	-0.0011208	-0.000370242	-0.000635971	-0.855429	-0.0110549	-0.11906	1.06156	0.93433	-0.692629	0.199063	0.215251	417	-0.00613676	0.0100513
P5635	ETH-1	2022-02-15	1.97119	0.0091504	0.000959223	-2.4309	0.0162791	0.00170652	19.3836	0.0091504	0.000959223	14.6107	0.0162791	0.00170652	33.9773	0.124416	0.0131146	29.338	0.516797	0.0544752	63.6842	18.4258	1.94225	-0.655572	0.123723	0.0129697	-0.0938681	0.513918	0.0538732	12.8537	18.3231	1.92079	-0.00036694	-0.000466169	-0.000545255	-0.000459455	-0.857315	0.00384712	-0.111394	1.04345	0.921186	-0.639961	0.253422	0.229455	229	0.0482216	0.0242545
PL5675	ETH-1	2022-02-24	1.85126	0.00993629	0.00104161	-2.62757	0.0133499	0.00139945	19.2627	0.00993629	0.00104161	14.4122	0.0133499	0.00139945	33.6168	0.125866	0.0132675	29.2314	0.672517	0.0708895	65.2237	21.8911	2.30753	-0.689505	0.125165	0.0131208	0.193909	0.668771	0.0701062	14.838	21.7692	2.28203	-0.00036694	-0.000466169	-0.000545255	-0.000459455	-0.857315	0.00384712	-0.111394	1.04345	0.921186	-0.67406	0.217841	0.196765	238	0.0126409	-0.008435
PL5728	ETH-1	2022-03-08	2.10696	0.00727221	0.000591804	-1.98477	0.0145052	0.00118042	19.5283	0.00727221	0.000591804	15.0607	0.0145052	0.00118042	34.5434	0.132627	0.0108289	30.7719	0.714422	0.0583323	75.1107	26.4612	2.16055	-0.690686	0.132184	0.010757	0.411434	0.712036	0.0579447	22.6878	26.3729	2.14619	-0.00036694	-0.000466169	-0.000545255	-0.000459455	-0.857315	0.00384712	-0.111394	1.04345	0.921186	-0.674815	0.217053	0.187624	250	0.0118531	-0.0175763
PL5769	ETH-1	2022-03-16	2.14351	0.00778562	0.000816154	-1.84784	0.0134071	0.00140544	19.5679	0.00778562	0.000816154	15.1988	0.0134071	0.00140544	34.7184	0.136862	0.0144265	30.8049	0.527604	0.0556143	67.9911	19.5758	2.06347	-0.695252	0.136099	0.0142671	0.171269	0.524664	0.0549998	15.6018	19.4667	2.04067	-0.00036694	-0.000466169	-0.000545255	-0.000459455	-0.857315	0.00384712	-0.111394	1.04345	0.921186	-0.679301	0.212372	0.187325	258	0.0071722	-0.0178752
PL5793_20V	ETH-1	2022-03-21	1.97147	0.0106535	0.00111679	-2.22829	0.0176892	0.00185433	19.391	0.0106535	0.00111679	14.8149	0.0176892	0.00185433	34.1766	0.0800831	0.00844151	30.6395	0.697578	0.0735312	204.49	61.8127	6.51564	-0.66823	0.079637	0.00834823	0.767439	0.693692	0.0727187	146.468	61.4684	6.44364	4.90911e-05	0.000251592	-2.89789e-05	9.05682e-05	-0.854438	0.00731103	-0.116563	1.04694	0.921901	-0.671326	0.219062	0.192593	263	0.0138624	-0.0126073
PL5826	ETH-1	2022-03-29	1.94591	0.0100998	0.00105874	-2.34347	0.0199928	0.00209581	19.3626	0.0100998	0.00105874	14.6988	0.0199928	0.00209581	34.0669	0.131902	0.0139037	30.8341	0.935382	0.0985979	222.107	72.4979	7.64195	-0.633065	0.131167	0.01375	1.18562	0.930171	0.0975084	163.533	72.094	7.55751	4.90911e-05	0.000251592	-2.89789e-05	9.05682e-05	-0.854438	0.00731103	-0.116563	1.04694	0.921901	-0.63615	0.255889	0.232233	271	0.0506889	0.0270329
PL5880_20V	ETH-1	2022-04-11	1.95437	0.0164374	0.00133766	-2.12287	0.02962	0.00241044	19.3784	0.0164374	0.00133766	14.9212	0.02962	0.00241044	34.2705	0.0916872	0.00748623	30.5785	0.524844	0.0428534	179.874	48.9464	3.99646	-0.667607	0.0913811	0.00743648	0.498755	0.523092	0.0425686	122.822	48.783	3.9699	4.90911e-05	0.000251592	-2.89789e-05	9.05682e-05	-0.854438	0.00731103	-0.116563	1.04694	0.921901	-0.670711	0.219706	0.21032	284	0.0145058	0.00512022
PL5934_20V	ETH-1	2022-04-24	2.03259	0.0301721	0.00200702	-2.14076	0.0533707	0.00355016	19.4522	0.0301721	0.00200702	14.9033	0.0533707	0.00355016	34.3184	0.124607	0.00830712	30.6494	0.586693	0.0391129	181.2	57.5832	3.83888	-0.678649	0.12433	0.00827028	0.60283	0.585388	0.0389394	124.036	57.4551	3.82185	-0.000194183	0.000806872	-6.39664e-06	0.000202097	-0.857932	0.0126176	-0.118609	1.03919	0.919492	-0.685585	0.207039	0.196743	297	0.00183912	-0.00845668
PL5949	ETH-1	2022-04-28	2.09674	0.0160616	0.0010684	-1.98768	0.0284737	0.00189404	19.5185	0.0160616	0.0010684	15.0577	0.0284737	0.00189404	34.5767	0.126791	0.00845271	31.9411	1.11683	0.0744555	364.533	131.057	8.73712	-0.645658	0.126509	0.00841523	1.55202	1.11435	0.0741253	298.019	130.765	8.69838	-0.000194183	0.000806872	-6.39664e-06	0.000202097	-0.857932	0.0126176	-0.118609	1.03919	0.919492	-0.652646	0.241269	0.233899	301	0.0360692	0.0286992
PL5970_20V	ETH-1	2022-05-03	1.99091	0.0320518	0.00311315	-2.14719	0.0578066	0.00561468	19.4123	0.0320518	0.00311315	14.8967	0.0578066	0.00561468	34.3011	0.125804	0.0122772	30.7525	0.578726	0.0564778	181.318	52.0697	5.08149	-0.648642	0.125204	0.0121609	0.715854	0.575963	0.0559425	124.209	51.8212	5.03332	-0.000194183	0.000806872	-6.39664e-06	0.000202097	-0.857932	0.0126176	-0.118609	1.03919	0.919492	-0.655574	0.238226	0.223314	306	0.0330263	0.018114
PL5997	ETH-1	2022-05-10	1.93472	0.0147605	0.00134186	-2.15173	0.0266141	0.00241946	19.3587	0.0147605	0.00134186	14.892	0.0266141	0.00241946	34.2349	0.128511	0.0117314	31.1225	0.741392	0.0676795	278.404	82.5698	7.53756	-0.653941	0.127974	0.011634	1.08431	0.738296	0.0671178	216.682	82.225	7.475	-0.000194183	0.000806872	-6.39664e-06	0.000202097	-0.857932	0.0126176	-0.118609	1.03919	0.919492	-0.66086	0.232733	0.221797	313	0.027533	0.0165968
PL6020_20V	ETH-1	2022-05-15	2.04558	0.0281977	0.00187568	-2.10788	0.0504828	0.00335807	19.4657	0.0281977	0.00187568	14.9365	0.0504828	0.00335807	34.3661	0.116194	0.00774629	31.4054	0.97099	0.0647327	217.563	95.7467	6.38311	-0.67829	0.115936	0.00771194	1.27134	0.96883	0.0644456	158.549	95.5337	6.35481	-0.000194183	0.000806872	-6.39664e-06	0.000202097	-0.857932	0.0126176	-0.118609	1.03919	0.919492	-0.685235	0.207402	0.19725	318	0.00220241	-0.00794991
PL6039_20V	ETH-1	2022-05-18	2.03804	0.0344795	0.00229354	-2.26116	0.0605715	0.00402916	19.4531	0.0344795	0.00229354	14.7819	0.0605715	0.00402916	34.2149	0.127575	0.008505	31.4561	1.29269	0.0861791	294.733	130.334	8.68896	-0.66208	0.127291	0.00846729	1.62553	1.28981	0.085797	232.363	130.044	8.65043	-0.000194183	0.000806872	-6.39664e-06	0.000202097	-0.857932	0.0126176	-0.118609	1.03919	0.919492	-0.668995	0.224279	0.211636	321	0.0190794	0.00643628
PL6072_20V	ETH-1	2022-05-25	2.13453	0.0518694	0.00543739	-1.53008	0.102933	0.0107903	19.5705	0.0518694	0.00543739	15.5191	0.102933	0.0107903	35.0661	0.166765	0.0175786	32.5252	1.01121	0.10659	241.679	92.4299	9.74297	-0.672111	0.165836	0.0173843	1.20856	1.00557	0.105413	180.034	91.915	9.63531	-0.000194183	0.000806872	9.47915e-05	0.000235827	-0.857932	0.0126176	-0.109944	1.03513	0.915199	-0.68038	0.210915	0.200106	328	0.00571472	-0.00509354
PL6100	ETH-1	2022-05-31	1.96827	0.0207	0.00188181	-2.26439	0.0345309	0.00313917	19.3867	0.0207	0.00188181	14.7785	0.0345309	0.00313917	34.135	0.112615	0.0102803	29.767	0.484226	0.0442036	99.5426	43.1273	3.93697	-0.668798	0.112145	0.010195	-0.00803875	0.482205	0.0438368	46.6549	42.9473	3.9043	-0.000132116	0.000546876	9.47915e-05	0.00016985	-0.869405	0.0175237	-0.109944	1.01721	0.911718	-0.674596	0.225514	0.205964	334	0.0203138	0.000764325
PL6135	ETH-1	2022-06-07	2.08383	0.0508752	0.00338417	-2.11889	0.0337237	0.00224327	19.5016	0.0508752	0.00338417	14.9254	0.0337237	0.00224327	34.3906	0.143192	0.00954614	30.0319	0.451634	0.030109	115.751	53.2647	3.55098	-0.680316	0.142874	0.00950381	-0.0403926	0.45063	0.0299754	61.6543	53.1462	3.53523	-0.000388754	-0.000230359	9.47915e-05	-0.000174774	-0.860283	-0.00273424	-0.109944	1.04396	0.92417	-0.674306	0.220222	0.215449	341	0.0150216	0.0102494
PL6160	ETH-1	2022-06-17	2.08367	0.0215345	0.00225743	-2.14975	0.0398037	0.00417256	19.5004	0.0215345	0.00225743	14.8943	0.0398037	0.00417256	34.3454	0.131116	0.0138209	31.5157	0.492202	0.0518827	96.2282	37.8403	3.98871	-0.692656	0.130386	0.0136682	1.46154	0.48946	0.0513094	43.1419	37.6295	3.94464	-0.000388754	-0.000230359	9.47915e-05	-0.000174774	-0.860283	-0.00273424	-0.109944	1.04396	0.92417	-0.686653	0.207331	0.189436	351	0.00213138	-0.0157639
PL6184	ETH-1	2022-06-18	2.11659	0.0166835	0.00162044	-2.09559	0.0247741	0.00240628	19.5336	0.0166835	0.00162044	14.949	0.0247741	0.00240628	34.4764	0.146994	0.0143452	30.4148	0.505473	0.0493291	28.672	10065.3	982.271	-0.652563	0.146293	0.0142092	0.284887	0.50306	0.0488615	-21.2804	10017.2	972.96	-0.000388754	-0.000230359	9.47915e-05	-0.000174774	-0.860283	-0.00273424	-0.109944	1.04396	0.92417	-0.646538	0.24921	0.23215	352	0.0440102	0.0269503
PL6234	ETH-1	2022-06-25	2.17083	0.0164975	0.00160238	-1.94303	0.0251643	0.00244417	19.5905	0.0164975	0.00160238	15.1029	0.0251643	0.00244417	34.618	0.12947	0.0126349	30.3757	0.452544	0.0441637	32.6715	15.1086	1.47445	-0.722318	0.128852	0.0125152	-0.0562783	0.450383	0.0437451	-17.8261	15.0365	1.46047	-0.000388754	-0.000230359	9.47915e-05	-0.000174774	-0.860283	-0.00273424	-0.109944	1.04396	0.92417	-0.716267	0.176415	0.201307	359	-0.0287847	-0.00389267
PL6265	ETH-1	2022-07-08	2.14899	0.105224	0.0102203	-1.99651	0.227427	0.0220897	19.5679	0.105224	0.0102203	15.0489	0.227427	0.0220897	34.5435	0.372339	0.0363366	30.0745	0.59913	0.0584691	40.814	17.3933	1.69741	-0.719183	0.370562	0.0359922	-0.242313	0.59627	0.0579148	-9.95501	17.3102	1.68132	-0.000680888	-0.000903433	-0.000213651	-0.000599324	-0.866217	-0.00819313	-0.120262	1.04586	0.932356	-0.69848	0.201842	0.194229	372	-0.00335844	-0.0109715
PL6303	ETH-1	2022-07-18	2.07456	0.0467883	0.00536698	-2.17575	0.0873916	0.0100245	19.4908	0.0467883	0.00536698	14.8681	0.0873916	0.0100245	34.3391	0.191886	0.0202266	30.0929	0.538707	0.0567847	55.4665	19.7621	2.08311	-0.693653	0.181468	0.0208158	0.0959644	0.536302	0.061518	3.10191	19.3311	2.21743	-0.000680888	-0.000903433	-0.000213651	-0.000599324	-0.866217	-0.00819313	-0.120262	1.04586	0.932356	-0.673072	0.228414	0.226536	382	0.0232144	0.021336
PL6332	ETH-1	2022-07-26	2.04139	0.0731912	0.00710896	-2.23477	0.159104	0.0154535	19.4572	0.0731912	0.00710896	14.8085	0.159104	0.0154535	34.2255	0.29721	0.0271314	30.3518	0.658586	0.0601204	75.6727	31.4961	2.87519	-0.723155	0.285601	0.0277401	0.505264	0.669325	0.0650106	24.6265	31.2507	3.03534	-0.000680888	-0.000903433	-0.000213651	-0.000599324	-0.866217	-0.00819313	-0.120262	1.04586	0.932356	-0.702643	0.197488	0.223487	390	-0.00771204	0.0182872
PL6337	ETH-1	2022-07-27	2.03304	0.0805243	0.00655297	-2.07533	0.181512	0.0147712	19.4549	0.0805243	0.00655297	14.9692	0.181512	0.0147712	34.3194	0.315137	0.0257309	30.8954	0.828916	0.0676807	89.0258	39.2114	3.2016	-0.744224	0.314085	0.0255599	0.711551	0.826148	0.067231	36.1874	39.0805	3.18032	-0.000680888	-0.000903433	-0.000213651	-0.000599324	-0.866217	-0.00819313	-0.120262	1.04586	0.932356	-0.723656	0.175511	0.204166	391	-0.029689	-0.00103355
PL6341	ETH-1	2022-07-11	2.11504	0.037242	0.00319348	-2.13551	0.0807554	0.00692472	19.5307	0.037242	0.00319348	14.9088	0.0807554	0.00692472	34.3553	0.157793	0.0128838	29.8273	0.507782	0.0414602	55.2111	23.855	1.94776	-0.740284	0.158016	0.0135498	-0.219966	0.51588	0.0442364	3.33611	24.5205	2.10262	-0.000680888	-0.000903433	-0.000213651	-0.000599324	-0.866217	-0.00819313	-0.120262	1.04586	0.932356	-0.719694	0.179655	0.207809	375	-0.0255454	0.00260923
PL6379_20V	ETH-1	2022-08-10	2.06942	0.046673	0.004243	-2.00793	0.0895229	0.00813845	19.4918	0.046673	0.004243	15.0373	0.0895229	0.00813845	34.4802	0.150914	0.0137765	30.0341	0.37808	0.0345139	54.9725	16.1975	1.47862	-0.692073	0.150284	0.0136622	-0.258496	0.376502	0.0342274	3.61532	16.1299	1.46635	-0.000416868	-0.0011208	-0.000370242	-0.000635971	-0.855429	-0.0110549	-0.11906	1.06156	0.93433	-0.670145	0.222931	0.251408	405	0.0177312	0.0462075
PL6396_20V	ETH-1	2022-08-15	2.17944	0.0231865	0.00198822	-1.86727	0.0490699	0.00420771	19.6014	0.0231865	0.00198822	15.1793	0.0490699	0.00420771	34.7025	0.105438	0.00907463	30.2327	0.348282	0.0299754	47.9319	13.4454	1.1572	-0.725628	0.105046	0.00900766	-0.345501	0.34699	0.0297541	-3.47067	13.3955	1.14866	-0.000416868	-0.0011208	-0.000370242	-0.000635971	-0.855429	-0.0110549	-0.11906	1.06156	0.93433	-0.703558	0.187461	0.199612	410	-0.0177391	-0.0055879
PL6427_20V	ETH-1	2022-08-24	2.1393	0.0145988	0.00132717	-2.0331	0.0350578	0.00318708	19.5574	0.0145988	0.00132717	15.012	0.0350578	0.00318708	34.507	0.102916	0.00939493	29.9973	0.327736	0.0299181	44.6782	12.2211	1.11563	-0.70812	0.102487	0.00931696	-0.244544	0.326367	0.0296698	-6.19738	12.1701	1.10637	-0.000416868	-0.0011208	-0.000370242	-0.000635971	-0.855429	-0.0110549	-0.11906	1.06156	0.93433	-0.686175	0.205914	0.221703	419	0.000714272	0.0165026
PL6449_20V	ETH-1	2022-08-29	2.13661	0.00690142	0.000670325	-1.98501	0.0106283	0.00103232	19.5565	0.00690142	0.000670325	15.0605	0.0106283	0.00103232	34.5653	0.0822629	0.00802804	29.6665	0.299667	0.0292445	26.4769	7.94334	0.77519	-0.697848	0.0818703	0.00795194	-0.661122	0.298236	0.0289673	-23.6031	7.90542	0.767842	-0.000416868	-0.0011208	-0.000370242	-0.000635971	-0.855429	-0.0110549	-0.11906	1.06156	0.93433	-0.675865	0.216859	0.223579	424	0.0116586	0.0183789
PL6477_20V	ETH-1	2022-09-05	2.1572	0.0119212	0.00108374	-2.01727	0.0209078	0.00190071	19.575	0.0119212	0.00108374	15.028	0.0209078	0.00190071	34.5818	0.0912316	0.00785196	29.9914	0.327463	0.0281835	35.6261	8.90511	0.76643	-0.669497	0.0917714	0.00834285	-0.268907	0.316132	0.0287392	-14.7972	8.89771	0.808883	-0.000416868	-0.0011208	-0.000370242	-0.000635971	-0.855429	-0.0110549	-0.11906	1.06156	0.93433	-0.647504	0.246966	0.252763	431	0.0417657	0.0475628
PL6502_20V	ETH-1	2022-09-12	2.1449	0.00958812	0.00078027	-2.03464	0.018564	0.00151072	19.5627	0.00958812	0.00078027	15.0105	0.018564	0.00151072	34.5226	0.0868398	0.00709044	30.181	0.481547	0.0393181	63.5687	20.5331	1.67652	-0.696828	0.0865498	0.00704332	-0.063216	0.479939	0.0390569	11.7706	20.4646	1.66538	-0.000416868	-0.0011208	-0.000370242	-0.000635971	-0.855429	-0.0110549	-0.11906	1.06156	0.93433	-0.674872	0.217913	0.213094	438	0.0127126	0.00789412
PL6527_20V	ETH-1	2022-09-18	2.12144	0.0102478	0.000761709	-1.95436	0.0143072	0.00106345	19.5432	0.0102478	0.000761709	15.0914	0.0143072	0.00106345	34.5845	0.0828624	0.0061762	30.1283	0.372712	0.0277803	47.7517	15.0013	1.11813	-0.695628	0.0826319	0.00614198	-0.273665	0.371675	0.0276264	-3.4119	14.9596	1.11194	-0.000416868	-0.000386066	-9.52512e-05	-0.000299395	-0.855429	0.00566373	-0.11906	1.04819	0.924098	-0.685274	0.205798	0.212253	444	0.000598017	0.00705325
PL6553	ETH-1	2022-09-26	1.88728	0.0791057	0.00768343	-1.99863	0.0940482	0.00913476	19.319	0.0791057	0.00768343	15.0463	0.0940482	0.00913476	34.2958	0.130991	0.0127834	30.0518	0.504158	0.0492008	43.1967	14.4132	1.40658	-0.704115	0.130366	0.0126622	-0.259097	0.501751	0.0487344	-7.42519	14.3444	1.39325	-5.53332e-05	-0.000386066	-9.52512e-05	-0.000178883	-0.847577	0.00566373	-0.11906	1.05839	0.924622	-0.69798	0.185884	0.207523	452	-0.0193163	0.00232254
PL6577	ETH-1	2022-10-05	2.02068	0.0194362	0.00166664	-2.10548	0.0378521	0.00324579	19.4421	0.0194362	0.00166664	14.9388	0.0378521	0.00324579	34.306	0.138477	0.0119182	29.9448	0.455266	0.0391831	53.8377	20.1616	1.73524	-0.714771	0.137964	0.0118303	-0.151321	0.453577	0.0388939	2.77897	20.0868	1.72243	-5.53332e-05	-0.000386066	-9.52512e-05	-0.000178883	-0.847577	0.00566373	-0.11906	1.05839	0.924622	-0.708634	0.174607	0.199517	461	-0.0305927	-0.00568293
PL6596	ETH-1	2022-10-10	1.87733	0.0282685	0.002424	-2.30702	0.0574081	0.0049227	19.2987	0.0282685	0.002424	14.7354	0.0574081	0.0049227	33.9473	0.159563	0.013733	29.6639	0.475112	0.0408912	47.5999	14.8137	1.27496	-0.719457	0.158971	0.0136317	-0.0230494	0.473349	0.0405894	-2.61433	14.7587	1.26555	-5.53332e-05	-0.000386066	-9.52512e-05	-0.000178883	-0.847577	0.00566373	-0.11906	1.05839	0.924622	-0.713385	0.16958	0.187377	466	-0.0356202	-0.0178227
PL6616_20V	ETH-1	2022-10-17	2.10158	0.0207215	0.00148011	-2.05098	0.0341093	0.00243638	19.5209	0.0207215	0.00148011	14.9939	0.0341093	0.00243638	34.4563	0.100355	0.00718656	30.0539	0.373531	0.0267491	52.4757	16.4768	1.17993	-0.702678	0.100097	0.0071498	-0.154009	0.372572	0.0266123	1.29364	16.4345	1.17389	-5.53332e-05	-0.000386066	-9.52512e-05	-0.000178883	-0.847577	0.00566373	-0.11906	1.05839	0.924622	-0.696514	0.187435	0.207293	473	-0.0177649	0.00209339
PL6668_20V	ETH-1	2022-10-30	2.0992	0.0298746	0.00290168	-1.82937	0.0753817	0.00732172	19.5264	0.0298746	0.00290168	15.2173	0.0753817	0.00732172	34.7206	0.165121	0.0161142	30.8051	0.670528	0.0654368	76.1598	24.9571	2.43556	-0.66919	0.164333	0.0159614	0.134963	0.667327	0.0648166	23.3774	24.838	2.41248	-5.53332e-05	-0.000386066	-9.52512e-05	-0.000178883	-0.847577	0.00566373	-0.11906	1.05839	0.924622	-0.662979	0.222929	0.239535	486	0.0177287	0.0343353
PL6684_20V	ETH-1	2022-11-03	2.10333	0.0128343	0.00124658	-2.04512	0.0368905	0.00358313	19.5228	0.0128343	0.00124658	14.9999	0.0368905	0.00358313	34.4737	0.111857	0.0109161	29.9247	0.387307	0.0377973	46.9395	13.8057	1.3473	-0.693446	0.111323	0.0108126	-0.290989	0.385458	0.037439	-3.98666	13.7398	1.33453	-5.53332e-05	-0.00037476	-0.000220846	-0.00021698	-0.847577	0.0168403	-0.111798	1.04579	0.914156	-0.685966	0.196783	0.215943	490	-0.0084175	0.010743
PL6684_20V	ETH-1	2022-11-03	2.10333	0.0128343	0.00124658	-2.04512	0.0368905	0.00358313	19.5228	0.0128343	0.00124658	14.9999	0.0368905	0.00358313	34.4737	0.111857	0.0109161	29.9247	0.387307	0.0377973	46.9395	13.8057	1.3473	-0.693446	0.111323	0.0108126	-0.290989	0.385458	0.037439	-3.98666	13.7398	1.33453	-5.53332e-05	-0.00037476	-0.000220846	-0.00021698	-0.847577	0.0168403	-0.111798	1.04579	0.914156	-0.685966	0.196783	0.215943	484	-0.0084175	0.010743
PL6901	ETH-1	02/18/23	2.18102	0.00718848	0.000753557	-2.14527	0.0123892	0.00129874	19.5931	0.00718848	0.000753557	14.8991	0.0123892	0.00129874	34.4099	0.125232	0.0132007	29.3964	0.482879	0.0508999	29.2038	6.41228	0.675913	-0.728664	0.124535	0.0130548	-0.605336	0.480189	0.0503375	-20.7406	6.37655	0.668444	-0.00130368	-0.000685471	-0.000754296	-0.000914483	-0.883319	-0.00640384	-0.123447	1.02455	0.931608	-0.697197	0.217292	0.216464	587	0.0120919	0.0112643
PL6910	ETH-1	02/28/23	2.17739	0.00856811	0.000697263	-1.89022	0.0132351	0.00107706	19.5986	0.00856811	0.000697263	15.1562	0.0132351	0.00107706	34.6716	0.118715	0.00969305	29.5282	0.437283	0.035704	15.0121	7.9368	0.648037	-0.730286	0.118319	0.00962864	-0.983582	0.435823	0.0354668	-34.7297	7.9103	0.643731	-0.00126043	-0.000714968	-0.000770203	-0.0009152	-0.882535	-0.00601502	-0.122942	1.02498	0.931181	-0.698554	0.215173	0.215088	589	0.00997317	0.00988772
PL6927	ETH-1	03/09/23	2.13837	0.00567103	0.000461501	-2.00267	0.00971647	0.000790715	19.454	0.00567103	0.000461501	15.0425	0.00971647	0.000790715	34.4088	0.0991783	0.00809787	28.8374	0.354133	0.0289148	1.37453	5.5807	0.455662	-0.727849	0.0988471	0.00804407	-1.43033	0.352951	0.0287227	-47.3454	5.56207	0.452635	-0.0010658	-0.000847702	-0.000841784	-0.000918428	-0.87901	-0.00426534	-0.120672	1.02693	0.929252	-0.696247	0.214258	0.217428	598	0.00905826	0.0122283
PL6954	ETH-1	03/15/23	2.14844	0.00797185	0.000835677	-1.98587	0.0126418	0.00132522	19.4666	0.00797185	0.000835677	15.0594	0.0126418	0.00132522	34.4383	0.11526	0.0121495	29.6257	0.438341	0.0462052	22.3053	7.59994	0.801104	-0.728548	0.114618	0.0120152	-0.698566	0.435899	0.0456946	-27.4777	7.5576	0.792252	-0.000962213	-0.000861666	-0.000857666	-0.000893848	-0.871555	-0.00473887	-0.124456	1.03847	0.932008	-0.697766	0.2074	0.215888	608	0.00220025	0.0106875
PL6976	ETH-1	03/20/23	2.17688	0.00651932	0.000633212	-1.83962	0.0113874	0.00110604	19.5999	0.00651932	0.000633212	15.2072	0.0113874	0.00110604	34.7375	0.0946912	0.00924092	29.7752	0.312171	0.0304648	18.8644	6.67453	0.651368	-0.71731	0.0942392	0.00915332	-0.844355	0.310681	0.030176	-31.1632	6.64267	0.645193	-0.000912446	-0.000822733	-0.000857637	-0.000864272	-0.853916	-0.00609757	-0.140488	1.07018	0.942499	-0.687287	0.206977	0.226516	617	0.00177653	0.0213163
PL6984	ETH-1	03/25/23	2.1005	0.00700934	0.000734778	-1.87955	0.0105175	0.00110253	19.5259	0.00700934	0.000734778	15.1667	0.0105175	0.00110253	34.6347	0.0821252	0.00865676	29.9231	0.337175	0.0355414	27.4406	9.27632	0.97781	-0.702636	0.0816677	0.0085611	-0.62122	0.335297	0.0351487	-22.856	9.22464	0.967005	-0.000879268	-0.000796777	-0.000857618	-0.000844554	-0.857733	-0.00700338	-0.140488	1.06588	0.942743	-0.673385	0.224992	0.240618	623	0.0197924	0.0354176
PL6998	ETH-1	04/07/23	2.1177	0.00565143	0.000459907	-2.07955	0.0106228	0.000864475	19.5352	0.00565143	0.000459907	14.9652	0.0106228	0.000864475	34.4315	0.0981767	0.00801609	29.5687	0.423658	0.0345916	29.0783	10.4119	0.850127	-0.713302	0.0978488	0.00796283	-0.56826	0.422244	0.0343617	-20.9261	10.3771	0.844478	-0.000823971	-0.000753518	-0.000857586	-0.000811692	-0.864093	-0.00851304	-0.140488	1.05879	0.943143	-0.685355	0.217498	0.228476	633	0.0122982	0.0232765
PL7025	ETH-1	04/10/23	2.09409	0.00714656	0.000749163	-1.88674	0.011957	0.00125343	19.5195	0.00714656	0.000749163	15.1595	0.011957	0.00125343	34.6261	0.0990589	0.0104417	29.5809	0.330264	0.0348129	17.0169	5.09129	0.536669	-0.697494	0.098507	0.0103263	-0.938996	0.328424	0.0344282	-32.7495	5.06292	0.530739	-0.000820701	-0.000874644	-0.000857567	-0.000850971	-0.848192	-0.00428597	-0.140488	1.07628	0.941829	-0.668028	0.222843	0.236051	646	0.017643	0.0308514
PL7032	ETH-1	04/17/23	2.10926	0.00585177	0.000568374	-1.91342	0.0110944	0.00107758	19.533	0.00585177	0.000568374	15.1326	0.0110944	0.00107758	34.5942	0.0779063	0.00760288	29.3347	0.937712	0.0915113	17.2554	9.94883	0.970907	-0.715962	0.0775344	0.00753081	-1.12504	0.933236	0.0906439	-32.486	9.90135	0.961704	-0.000833519	-0.000861666	-0.000857567	-0.000850918	-0.8501	-0.00473887	-0.140488	1.07411	0.941956	-0.686526	0.204552	0.227289	649	-0.000648093	0.0220886
PL7047	ETH-1	04/25/23	2.14844	0.00661781	0.000642778	-1.96332	0.0109867	0.00106712	19.5685	0.00661781	0.000642778	15.0824	0.0109867	0.00106712	34.5787	0.0856564	0.00835921	29.4233	0.46705	0.0455794	18.1221	7.95922	0.776741	-0.7182	0.0852476	0.00827998	-0.940192	0.46482	0.0451473	-31.6035	7.92123	0.769378	-0.000863428	-0.000831384	-0.000857567	-0.000850793	-0.854552	-0.00579564	-0.140488	1.06907	0.942247	-0.68878	0.205892	0.225002	656	0.000692341	0.0198016
PL7065	ETH-1	05/06/23	2.11792	0.00736876	0.000669887	-2.06126	0.0115752	0.00105229	19.5361	0.00736876	0.000669887	14.9836	0.0115752	0.00105229	34.453	0.0963504	0.00879555	29.6376	0.451049	0.041175	29.9084	11.0514	1.00885	-0.711245	0.0959481	0.00872255	-0.537726	0.449166	0.0408333	-20.1722	11.0053	1.00048	-0.000897609	-0.000796777	-0.000857567	-0.000850651	-0.859641	-0.00700338	-0.140488	1.06336	0.942574	-0.681938	0.217428	0.231942	664	0.0122283	0.0267422
P4870	ETH-2	2021-08-02	-10.2427	0.00873709	0.000915896	-18.9159	0.0139719	0.00146465	7.1909	0.00873709	0.000915896	-2.03274	0.0139719	0.00146465	4.69367	0.132368	0.0139528	-4.57096	0.461712	0.0486687	-10.6811	6.8211	0.719007	-0.710359	0.131631	0.0137987	-0.511625	0.45914	0.0481309	-14.2769	6.7831	0.711062	-0.00240034	-0.00161619	-0.00158414	-0.00186689	-0.861903	-0.0212352	-0.129189	1.06647	0.945464	-0.701597	0.197234	0.19493	32	-0.0112662	-0.01357
P4914	ETH-2	2021-08-17	-10.0076	0.00918756	0.000963118	-18.3493	0.0132731	0.0013914	7.43442	0.00918756	0.000963118	-1.46111	0.0132731	0.0013914	5.54209	0.131075	0.0138165	-2.59733	0.547158	0.0576755	10.5538	8.23133	0.867658	-0.678674	0.130345	0.0136639	0.323774	0.54411	0.0570382	5.48933	8.18547	0.85807	-0.00240034	-0.00161619	-0.00158414	-0.00186689	-0.861903	-0.0212352	-0.129189	1.06647	0.945464	-0.668327	0.232714	0.222401	47	0.0242144	0.0139013
P4934	ETH-2	2021-08-24	-9.90005	0.00946279	0.00099197	-18.2959	0.0134544	0.0014104	7.53857	0.00946279	0.00099197	-1.4071	0.0134544	0.0014104	5.68232	0.116257	0.0122546	-2.38735	0.609886	0.0642876	12.7814	7.93371	0.836286	-0.699047	0.11561	0.0121192	0.426142	0.606488	0.0635772	7.48773	7.88951	0.827045	-0.00240034	-0.00161619	-0.00158414	-0.00186689	-0.861903	-0.0212352	-0.129189	1.06647	0.945464	-0.688439	0.211266	0.200374	54	0.00276605	-0.00812584
P4973	ETH-2	2021-09-08	-10.4096	0.00846689	0.000887571	-19.4997	0.0151018	0.0015831	7.01158	0.00846689	0.000887571	-2.62164	0.0151018	0.0015831	3.92596	0.109241	0.011515	-5.79204	0.469006	0.0494375	-9.48291	6.61795	0.697594	-0.710749	0.108632	0.0113878	-0.558485	0.466393	0.0488912	-11.7502	6.58109	0.689885	-0.00231954	-0.00185654	-0.00175255	-0.00197621	-0.865114	-0.0107922	-0.131801	1.05516	0.940023	-0.702991	0.198256	0.218691	69	-0.010244	0.0101907
P5002	ETH-2	2021-09-14	-9.93352	0.00877446	0.000919813	-17.9691	0.0124515	0.00130527	7.51828	0.00877446	0.000919813	-1.07775	0.0124515	0.00130527	6.00634	0.124537	0.0131274	-1.67413	0.556907	0.0587032	15.6996	10.9789	1.15727	-0.68034	0.123843	0.0129823	0.481305	0.553805	0.0580545	9.75783	10.9177	1.14448	-0.00231954	-0.00185654	-0.00175255	-0.00197621	-0.865114	-0.0107922	-0.131801	1.05516	0.940023	-0.66847	0.234681	0.219789	75	0.026181	0.0112887
P5037	ETH-2	2021-09-21	-10.0915	0.00798239	0.000836782	-18.7849	0.0140287	0.00147061	7.33929	0.00798239	0.000836782	-1.90035	0.0140287	0.00147061	4.99987	0.114269	0.012045	-3.88585	0.440276	0.0464092	-1.48961	6.2544	0.659272	-0.688062	0.113632	0.0119119	-0.0890338	0.437823	0.0458964	-5.53429	6.21956	0.651987	-0.00231954	-0.00185654	-0.00175255	-0.00197621	-0.865114	-0.0107922	-0.131801	1.05516	0.940023	-0.678181	0.224434	0.230206	82	0.0159341	0.0217059
P5108	ETH-2	2021-10-11	-10.4378	0.00718022	0.000752692	-19.6797	0.0147518	0.00154641	6.9784	0.00718022	0.000752692	-2.80308	0.0147518	0.00154641	3.73368	0.108183	0.0114035	-6.1245	0.486804	0.0513136	-9.41631	4.51636	0.476066	-0.689446	0.107581	0.0112775	-0.52909	0.484091	0.0507466	-11.2956	4.4912	0.470805	-0.00231954	-0.00185654	-0.00175255	-0.00197621	-0.865114	-0.0107922	-0.131801	1.05516	0.940023	-0.682067	0.220334	0.215055	102	0.0118337	0.00655506
P5073	ETH-2	2021-09-28	-10.3982	0.00912934	0.00104721	-19.3779	0.0154213	0.00176895	7.02672	0.00912934	0.00104721	-2.49879	0.0154213	0.00176895	4.11141	0.105391	0.0111091	-3.35278	0.943235	0.0994257	35.434	19.4739	2.05272	-0.666176	0.106415	0.0122067	1.69106	0.945148	0.108416	35.0508	19.2821	2.21181	-0.00231954	-0.00185654	-0.00175255	-0.00197621	-0.865114	-0.0107922	-0.131801	1.05516	0.940023	-0.658051	0.245674	0.242323	89	0.0371745	0.0338229
P5139	ETH-2	2021-10-17	-10.3513	0.00794232	0.000590348	-19.2843	0.0163031	0.0012118	7.07464	0.00794232	0.000590348	-2.4044	0.0163031	0.0012118	9.74385	8.5862	0.538746	7.30041	18.2663	1.14613	14.3236	9.95131	0.6244	-0.666828	0.11922	0.00886154	0.421107	0.53419	0.039706	8.6015	8.73742	0.649447	-0.00231954	-0.00185654	-0.00175255	-0.00197621	-0.865114	-0.0107922	-0.131801	1.05516	0.940023	-0.647573	0.256731	0.249504	108	0.0482308	0.0410045
P5190	ETH-2	2021-10-27	-10.4497	0.00840144	0.00088071	-19.4455	0.016056	0.00168313	6.97535	0.00840144	0.00088071	-2.56707	0.016056	0.00168313	3.99387	0.120616	0.0127141	-4.64047	0.512598	0.0540326	10.5072	9.00085	0.948773	-0.659801	0.119945	0.0125736	0.48966	0.509742	0.0534355	8.12452	8.95071	0.938289	-0.00205191	-0.00194239	-0.00185616	-0.00195015	-0.870078	-0.00599238	-0.12997	1.044	0.935694	-0.652013	0.254993	0.240778	118	0.0464932	0.0322777
P5259	ETH-2	2021-11-09	-10.0535	0.00830159	0.000870243	-18.4509	0.0135402	0.0014194	7.38716	0.00830159	0.000870243	-1.5636	0.0135402	0.0014194	5.34727	0.108608	0.0114483	-3.91662	0.496095	0.052293	-11.7787	8.06458	0.850081	-0.723096	0.108003	0.0113218	-0.794287	0.493331	0.0517152	-16.4837	8.01965	0.840688	-0.00205191	-0.00194239	-0.00185616	-0.00195015	-0.870078	-0.00599238	-0.12997	1.044	0.935694	-0.712668	0.191668	0.171588	131	-0.0168315	-0.0369123
P5414	ETH-2	2021-12-21	-10.0743	0.00959766	0.00122885	-17.976	0.0268692	0.00344024	7.38416	0.00959766	0.00122885	-1.085	0.0268692	0.00344024	5.90252	0.130456	0.0150638	-1.93692	0.506055	0.0584342	8.79466	10.1055	1.16688	-0.649277	0.134636	0.0172384	0.277389	0.499732	0.0639842	4.58862	10.4594	1.33919	-0.000996413	-0.00119491	-0.00073394	-0.000975087	-0.853935	3.95166e-05	-0.109808	1.04995	0.922871	-0.643521	0.247208	0.212466	173	0.0387085	0.00396575
P5452	ETH-2	2021-12-29	-9.99227	0.00904156	0.000947813	-17.775	0.021855	0.00229103	7.46927	0.00904156	0.000947813	-0.882167	0.021855	0.00229103	6.17397	0.128797	0.0135764	-1.18377	0.669137	0.0705332	27.3908	15.0483	1.58623	-0.656022	0.12808	0.0134264	0.580881	0.665409	0.0697538	21.0407	14.9645	1.56871	-0.000630862	-0.000820652	-0.000590289	-0.000680601	-0.845293	-0.000961318	-0.110533	1.06245	0.924438	-0.65182	0.231913	0.194938	181	0.0234127	-0.0135616
P5472	ETH-2	2022-01-02	-9.98887	0.0075841	0.00079503	-18.2724	0.0164829	0.00172788	7.45496	0.0075841	0.00079503	-1.38352	0.0164829	0.00172788	5.65015	0.114503	0.0120697	-2.63524	0.532254	0.0561045	13.1207	14.1737	1.49404	-0.668644	0.113866	0.0119364	0.13032	0.529289	0.0554845	7.86757	14.0948	1.47753	-0.00064187	-0.000686345	-0.00052657	-0.000618262	-0.852818	0.000561792	-0.110696	1.05145	0.923091	-0.665151	0.223718	0.219221	185	0.0152182	0.0107206
P5575_20 volts	ETH-2	2022-01-28	-10.0884	0.0098814	0.00103585	-18.5953	0.0157394	0.00164994	7.34894	0.0098814	0.00103585	-1.70929	0.0157394	0.00164994	5.21031	0.109441	0.0115361	-3.0183	0.543011	0.0572384	24.8204	15.5008	1.63393	-0.676751	0.108831	0.0114086	0.398786	0.539986	0.0566059	20.275	15.4145	1.61587	-0.00064187	-0.000686345	-0.00052657	-0.000618262	-0.852818	0.000561792	-0.110696	1.05145	0.923091	-0.67353	0.214908	0.209992	211	0.0064082	0.00149194
P5616	ETH-2	2022-02-10	-10.1124	0.0106021	0.0011114	-18.6513	0.0173486	0.00181863	7.32417	0.0106021	0.0011114	-1.76577	0.0173486	0.00181863	5.11582	0.135071	0.0142377	-2.75054	0.754208	0.0795005	49.6285	32.1509	3.389	-0.689764	0.134318	0.0140804	0.780692	0.750007	0.078622	45.1166	31.9717	3.35155	-0.00036694	-0.000686345	-0.000545255	-0.000532847	-0.857315	0.000561792	-0.111394	1.04599	0.923151	-0.687038	0.204513	0.19268	224	-0.00398667	-0.0155196
P5640	ETH-2	2022-02-16	-10.0265	0.00893847	0.000937006	-18.6763	0.0163799	0.00171708	7.40495	0.00893847	0.000937006	-1.79079	0.0163799	0.00171708	5.2122	0.128976	0.0135953	-3.25472	0.55437	0.0584357	30.2856	22.4314	2.36447	-0.651988	0.128258	0.013445	0.324885	0.551282	0.05779	25.8197	22.3064	2.33835	-0.00036694	-0.000466169	-0.000545255	-0.000459455	-0.857315	0.00384712	-0.111394	1.04345	0.921186	-0.649593	0.243371	0.218817	230	0.0348708	0.0103172
PL5680	ETH-2	2022-02-25	-9.47105	0.00999485	0.00104775	-18.3152	0.0138144	0.00144814	7.94579	0.00999485	0.00104775	-1.42561	0.0138144	0.00144814	6.11702	0.118394	0.0124798	-1.87691	0.796783	0.0839883	48.9518	30.4209	3.20665	-0.665602	0.117734	0.0123419	0.975121	0.792344	0.0830603	43.0577	30.2514	3.17121	-0.00036694	-0.000466169	-0.000545255	-0.000459455	-0.857315	0.00384712	-0.111394	1.04345	0.921186	-0.662791	0.229599	0.208871	239	0.0210991	0.000370702
PL5706	ETH-2	2022-03-03	-9.95885	0.00976655	0.00102381	-18.2542	0.0140143	0.0014691	7.48414	0.00976655	0.00102381	-1.36511	0.0140143	0.0014691	5.72191	0.130335	0.0137385	-1.96021	0.727528	0.0766882	43.7454	26.9702	2.84291	-0.645316	0.129609	0.0135867	0.770314	0.723475	0.0758408	38.2639	26.82	2.8115	-0.00036694	-0.000466169	-0.000545255	-0.000459455	-0.857315	0.00384712	-0.111394	1.04345	0.921186	-0.642687	0.250577	0.227233	245	0.0420772	0.0187329
PL5729	ETH-2	2022-03-08	-10.1612	0.00681515	0.000714422	-18.7027	0.0146178	0.00153236	7.27593	0.00681515	0.000714422	-1.81769	0.0146178	0.00153236	5.06143	0.117343	0.0123691	-3.26563	0.65541	0.0690863	24.2406	19.2076	2.02466	-0.643357	0.116689	0.0122324	0.367836	0.651758	0.0683228	19.9941	19.1006	2.00228	-0.00036694	-0.000466169	-0.000545255	-0.000459455	-0.857315	0.00384712	-0.111394	1.04345	0.921186	-0.641032	0.252304	0.225097	250	0.0438038	0.0165971
PL5774	ETH-2	2022-03-17	-9.93985	0.00947811	0.000993576	-17.9986	0.0148555	0.00155728	7.51122	0.00947811	0.000993576	-1.10748	0.0148555	0.00155728	5.98705	0.145171	0.0153023	-1.51339	0.687948	0.0725161	110.075	55.3013	5.82927	-0.663041	0.144362	0.0151333	0.70196	0.684116	0.0717148	103.654	54.9933	5.76486	4.90911e-05	0.000251592	-2.89789e-05	9.05682e-05	-0.854438	0.00731103	-0.116563	1.04694	0.921901	-0.663583	0.227168	0.206201	259	0.0186685	-0.00229934
P5527	ETH-2	2022-04-04	-10.0969	0.0162848	0.00170711	-18.7898	0.0212744	0.00223016	7.33399	0.0162848	0.00170711	-1.90538	0.0212744	0.00223016	5.0259	0.131464	0.0138575	-0.477655	2.08488	0.219765	323.25	163.727	17.2583	-0.651797	0.130731	0.0137044	3.34227	2.07326	0.217337	317.911	162.815	17.0676	4.90911e-05	0.000251592	-2.89789e-05	9.05682e-05	-0.854438	0.00731103	-0.116563	1.04694	0.921901	-0.652252	0.239031	0.213002	277	0.0305315	0.00450212
PL5830	ETH-2	2022-03-30	-9.98937	0.0101944	0.00106866	-18.2138	0.0153465	0.00160875	7.45655	0.0101944	0.00106866	-1.32449	0.0153465	0.00160875	5.72385	0.129335	0.0136331	-1.85273	0.713863	0.0752478	161.003	78.6723	8.29278	-0.655105	0.128615	0.0134825	0.796679	0.709886	0.0744163	154.847	78.234	8.20115	4.90911e-05	0.000251592	-2.89789e-05	9.05682e-05	-0.854438	0.00731103	-0.116563	1.04694	0.921901	-0.655624	0.235501	0.211658	272	0.0270014	0.00315834
PL5855	ETH-2	2022-04-05	-10.3453	0.00999493	0.00104775	-19.3535	0.0157352	0.0016495	7.07787	0.00999493	0.00104775	-2.4741	0.0157352	0.0016495	4.17223	0.129004	0.0135983	-3.64373	0.890631	0.0938807	202.947	109.828	11.5769	-0.678834	0.128286	0.013448	1.30486	0.885669	0.0928433	199.761	109.216	11.4489	4.90911e-05	0.000251592	-2.89789e-05	9.05682e-05	-0.854438	0.00731103	-0.116563	1.04694	0.921901	-0.679212	0.210806	0.186227	278	0.00230606	-0.0222733
PL5884_20V	ETH-2	2022-04-12	-9.9753	0.0166195	0.00135248	-18.4834	0.026575	0.00216264	7.46041	0.0166195	0.00135248	-1.59622	0.026575	0.00216264	5.45236	0.0971962	0.00793603	-2.14424	0.765665	0.0625163	193.421	95.5125	7.79856	-0.661506	0.0968716	0.0078833	1.04907	0.763108	0.0621009	187.724	95.1936	7.74674	4.90911e-05	0.000251592	-2.89789e-05	9.05682e-05	-0.854438	0.00731103	-0.116563	1.04694	0.921901	-0.661999	0.228826	0.219565	285	0.0203264	0.0110647
PL5888_20V	ETH-2	2022-04-13	-9.90135	0.0184818	0.00150403	-18.1944	0.0286025	0.00232764	7.54092	0.0184818	0.00150403	-1.30478	0.0286025	0.00232764	5.82007	0.0899685	0.0073459	-1.14062	1.07464	0.0877439	226.642	120.994	9.87909	-0.665244	0.0896681	0.00729709	1.47114	1.07105	0.0871609	219.982	120.59	9.81345	4.90911e-05	0.000251592	-2.89789e-05	9.05682e-05	-0.854438	0.00731103	-0.116563	1.04694	0.921901	-0.665771	0.224878	0.215562	286	0.0163776	0.00706225
PL5954	ETH-2	2022-04-29	-10.0317	0.0131413	0.0012764	-18.4745	0.0195171	0.00189567	7.40707	0.0131413	0.0012764	-1.58734	0.0195171	0.00189567	5.3835	0.12728	0.0124212	-2.74705	0.602007	0.0587498	128.812	78.1323	7.62493	-0.684092	0.126672	0.0123035	0.426521	0.599133	0.058193	123.467	77.7593	7.55265	-0.000194183	0.000806872	-6.39664e-06	0.000202097	-0.857932	0.0126176	-0.118609	1.03919	0.919492	-0.68518	0.20746	0.200009	302	-0.00103979	-0.00849108
PL5917	ETH-2	04/20/2022	-9.82277	0.0221454	0.00215095	-18.1679	0.0324395	0.0031508	7.61657	0.0221454	0.00215095	-1.27787	0.0324395	0.0031508	5.91089	0.141147	0.0137745	1.32641	2.01985	0.197117	704.384	254.554	24.842	-0.678897	0.140473	0.013644	3.89053	2.01021	0.195248	694.904	253.339	24.6065	-0.000194183	0.000806872	-6.39664e-06	0.000202097	-0.857932	0.0126176	-0.118609	1.03919	0.919492	-0.680092	0.212747	0.197555	308	0.00424725	-0.010945
PL6000	ETH-2	2022-05-11	-9.51452	0.0183715	0.00122205	-18.038	0.0316615	0.00210609	7.91424	0.0183715	0.00122205	-1.14631	0.0316615	0.00210609	6.37961	0.123116	0.00820771	-0.686578	1.15257	0.0768381	185.256	98.3949	6.55966	-0.647305	0.122842	0.00817132	1.60848	1.15001	0.0764974	177.988	98.176	6.53057	-0.000194183	0.000806872	-6.39664e-06	0.000202097	-0.857932	0.0126176	-0.118609	1.03919	0.919492	-0.648594	0.24548	0.234149	314	0.0369799	0.0256492
PL6009_20V	ETH-2	2022-05-13	-9.9583	0.0525469	0.00349537	-18.397	0.0922267	0.00613483	7.47963	0.0525469	0.00349537	-1.50913	0.0922267	0.00613483	5.58743	0.156985	0.0104657	-0.9485	1.54834	0.103223	260.666	181.84	12.1227	-0.632629	0.156636	0.0104193	2.0738	1.5449	0.102765	254.407	181.435	12.0689	-0.000194183	0.000806872	-6.39664e-06	0.000202097	-0.857932	0.0126176	-0.118609	1.03919	0.919492	-0.633758	0.260897	0.249089	316	0.052397	0.0405892
PL6026_20V	ETH-2	2022-05-16	-10.0335	0.0178633	0.00118825	-18.703	0.0325094	0.00216249	7.39734	0.0178633	0.00118825	-1.81773	0.0325094	0.00216249	5.12952	0.0951485	0.00634324	-2.63349	0.847472	0.0564981	145.039	78.8874	5.25916	-0.69989	0.0949369	0.00631511	1.00237	0.845586	0.0562476	140.145	78.7119	5.23584	-0.000194183	0.000806872	-6.39664e-06	0.000202097	-0.857932	0.0126176	-0.118609	1.03919	0.919492	-0.700926	0.191096	0.181449	319	-0.0174036	-0.0270513
PL6106	ETH-2	2022-06-01	-10.2192	0.0232597	0.00266807	-19.0091	0.0359511	0.00412388	7.20993	0.0232597	0.00266807	-2.12663	0.0359511	0.00412388	4.61269	0.129772	0.0149848	-4.40416	0.428268	0.0494521	30.0866	44.7977	5.1728	-0.71795	0.128904	0.0147863	-0.156016	0.425403	0.0487971	26.5117	44.4981	5.10428	-0.000132116	0.000546876	9.47915e-05	0.00016985	-0.869405	0.0175237	-0.109944	1.01721	0.911718	-0.718733	0.180617	0.169606	335	-0.0278834	-0.0388936
PL6110	ETH-2	2022-06-02	-9.84423	0.0228305	0.00239329	-18.6575	0.0414732	0.00434757	7.57889	0.0228305	0.00239329	-1.77142	0.0414732	0.00434757	5.34678	0.13815	0.0145623	-3.59174	0.424254	0.0447203	73.6891	105.151	11.4052	-0.71527	0.137381	0.0144014	-0.0521498	0.42189	0.0442261	54.9652	281.787	29.5394	-0.000388754	-0.000230359	9.47915e-05	-0.000174774	-0.860283	-0.00273424	-0.109944	1.04396	0.92417	-0.714335	0.178432	0.174144	336	-0.030068	-0.0343556
PL6137	ETH-2	2022-06-07	-10.1356	0.0190751	0.00163568	-18.8145	0.0343332	0.00294404	7.29627	0.0190751	0.00163568	-1.93031	0.0343332	0.00294404	4.939	0.13078	0.0112558	-3.97635	0.486632	0.0418826	35.3019	50.9073	4.3814	-0.675059	0.130295	0.0111727	-0.11985	0.484826	0.0415735	31.216	50.7184	4.34906	-0.000388754	-0.000230359	9.47915e-05	-0.000174774	-0.860283	-0.00273424	-0.109944	1.04396	0.92417	-0.674195	0.220337	0.215563	341	0.0118366	0.00706304
PL6155	ETH-2	2022-06-11	-10.0459	0.0180307	0.0017513	-18.6887	0.0336967	0.00327292	7.38606	0.0180307	0.0017513	-1.8033	0.0336967	0.00327292	5.15534	0.115757	0.0112967	-4.12934	0.485251	0.0473557	29.3291	41.053	4.00636	-0.676869	0.115205	0.0111897	-0.527823	0.482935	0.0469068	24.9131	40.8571	3.96839	-0.000388754	-0.000230359	9.47915e-05	-0.000174774	-0.860283	-0.00273424	-0.109944	1.04396	0.92417	-0.675968	0.218486	0.213734	345	0.00998633	0.00523427
PL6207	ETH-2	2022-06-24	-10.1065	0.0247175	0.00240077	-18.9182	0.039088	0.00379656	7.32028	0.0247175	0.00240077	-2.03477	0.039088	0.00379656	4.80317	0.133466	0.0130249	-4.55346	0.431535	0.0421135	-96.3734	1707.1	166.596	-0.731886	0.132829	0.0129015	-0.489998	0.429475	0.0417143	-99.7774	1698.96	165.017	-0.000388754	-0.000230359	9.47915e-05	-0.000174774	-0.860283	-0.00273424	-0.109944	1.04396	0.92417	-0.731046	0.160987	0.169929	358	-0.0475134	-0.0385712
PL6226	ETH-2	2022-06-28	-10.126	0.0270007	0.00283045	-18.9099	0.0427175	0.00447801	7.30211	0.0270007	0.00283045	-2.02644	0.0427175	0.00447801	4.83643	0.114582	0.012078	-4.14323	0.453266	0.0477785	257.53	2670.28	281.472	-0.688398	0.113943	0.0119445	-0.0947767	0.450741	0.0472505	252.797	2655.4	278.362	-0.000388754	-0.000230359	9.47915e-05	-0.000174774	-0.860283	-0.00273424	-0.109944	1.04396	0.92417	-0.687553	0.206392	0.212629	362	-0.00210802	0.00412852
PL6242	ETH-2	2022-07-02	-9.92304	0.0362707	0.00352292	-18.509	0.0609457	0.00591957	7.5092	0.0362707	0.00352292	-1.62193	0.0609457	0.00591957	5.46015	0.138506	0.0135168	-3.05995	0.491219	0.0479381	18.1422	16.9472	1.65387	-0.678397	0.137845	0.0133887	0.181929	0.488875	0.0474837	13.2802	16.8663	1.6382	-0.000388754	-0.000230359	9.47915e-05	-0.000174774	-0.860283	-0.00273424	-0.109944	1.04396	0.92417	-0.677443	0.216947	0.238381	366	0.00844666	0.0298813
PL6279	ETH-2	2022-07-12	-9.94403	0.0480214	0.00436558	-18.4492	0.0879066	0.00799151	7.49135	0.0480214	0.00436558	-1.56171	0.0879066	0.00799151	5.52915	0.172562	0.0157527	-2.96716	0.526681	0.0480792	25.0855	17.4041	1.58877	-0.6508	0.171841	0.0156219	0.154372	0.524482	0.0476802	20.0888	17.3314	1.57558	-0.000680888	-0.000903433	-0.000213651	-0.000599324	-0.866217	-0.00819313	-0.120262	1.04586	0.932356	-0.647486	0.255174	0.237234	376	0.046674	0.0287338
PL6311	ETH-2	2022-07-20	-10.0069	0.0415224	0.00377477	-18.6284	0.0765258	0.00695689	7.42525	0.0415224	0.00377477	-1.74244	0.0765258	0.00695689	5.25324	0.174267	0.0159083	-3.13161	0.555587	0.0507179	24.8973	17.2901	1.57836	-0.679548	0.17354	0.0157763	0.351532	0.553267	0.050297	20.3357	17.2179	1.56527	-0.000680888	-0.000903433	-0.000213651	-0.000599324	-0.866217	-0.00819313	-0.120262	1.04586	0.932356	-0.6764	0.224934	0.223321	384	0.0164342	0.0148206
PL6345	ETH-2	2022-07-30	-9.96621	0.0325827	0.00296206	-18.6188	0.053789	0.00488991	7.46427	0.0325827	0.00296206	-1.73272	0.053789	0.00488991	5.24238	0.137695	0.0125698	-3.44098	0.54338	0.0496036	13.5044	15.2356	1.39081	-0.739842	0.13712	0.0124655	0.0216064	0.541111	0.0491919	8.93257	15.1719	1.37927	-0.000680888	-0.000903433	-0.000213651	-0.000599324	-0.866217	-0.00819313	-0.120262	1.04586	0.932356	-0.7367	0.161869	0.192173	394	-0.0466314	-0.0163271
PL6383_20V	ETH-2	2022-08-11	-9.89924	0.0253452	0.00230411	-18.3928	0.0534615	0.00486014	7.53593	0.0253452	0.00230411	-1.50476	0.0534615	0.00486014	5.6174	0.114816	0.0104812	-3.28097	0.283012	0.0258353	-3.48729	7.73985	0.706549	-0.66476	0.114337	0.0103942	-0.27447	0.28183	0.0256209	-8.50266	7.70754	0.700685	-0.000416868	-0.0011208	-0.000370242	-0.000635971	-0.855429	-0.0110549	-0.11906	1.06156	0.93433	-0.661187	0.23244	0.25989	406	0.0239401	0.0513898
PL6403_20V	ETH-2	2022-08-17	-9.92264	0.0191449	0.00174044	-18.5305	0.0454846	0.00413496	7.50882	0.0191449	0.00174044	-1.64359	0.0454846	0.00413496	5.38894	0.107895	0.0098494	-3.41478	0.301544	0.027527	3.84937	8.57404	0.782699	-0.727467	0.107444	0.00976766	-0.130661	0.300285	0.0272986	-0.901339	8.53824	0.776204	-0.000416868	-0.0011208	-0.000370242	-0.000635971	-0.855429	-0.0110549	-0.11906	1.06156	0.93433	-0.724039	0.165719	0.178826	412	-0.042781	-0.0296741
PL6435_20V	ETH-2	2022-08-26	-9.98182	0.0101502	0.000922749	-18.5382	0.0251318	0.00228471	7.45228	0.0101502	0.000922749	-1.65149	0.0251318	0.00228471	5.34288	0.0979638	0.00894283	-3.29921	0.351816	0.0321162	10.8122	10.7547	0.981763	-0.70761	0.0975547	0.00886861	0.00111688	0.350347	0.0318497	6.10441	10.7098	0.973616	-0.000416868	-0.0011208	-0.000370242	-0.000635971	-0.855429	-0.0110549	-0.11906	1.06156	0.93433	-0.704212	0.186767	0.203672	421	-0.0217333	-0.00482771
PL6451_20V	ETH-2	2022-08-30	-10.0782	0.00910423	0.000884281	-18.7234	0.0162383	0.00157721	7.35414	0.00910423	0.000884281	-1.83839	0.0162383	0.00157721	5.05704	0.0994799	0.00970824	-3.59124	0.334817	0.0326748	20.3814	13.9781	1.36412	-0.707389	0.099005	0.00961622	0.0825275	0.333218	0.032365	16.1083	13.9114	1.35119	-0.000416868	-0.0011208	-0.000370242	-0.000635971	-0.855429	-0.0110549	-0.11906	1.06156	0.93433	-0.704173	0.186808	0.19445	425	-0.021692	-0.0140501
PL6481_20V	ETH-2	2022-09-06	-10.0708	0.00856153	0.000636373	-18.7436	0.015044	0.00111821	7.3604	0.00856153	0.000636373	-1.85877	0.015044	0.00111821	5.04082	0.0877677	0.00654182	-3.49888	0.434639	0.0323961	25.6038	17.0975	1.27437	-0.709879	0.0875236	0.00650558	0.216065	0.43343	0.0322166	21.343	17.0499	1.26731	-0.000416868	-0.0011208	-0.000370242	-0.000635971	-0.855429	-0.0110549	-0.11906	1.06156	0.93433	-0.706673	0.184154	0.179149	432	-0.0243457	-0.0293512
PL6541_20V	ETH-2	2022-09-22	-10.0605	0.0107161	0.000712827	-18.6508	0.010916	0.000726119	7.37346	0.0107161	0.000712827	-1.76514	0.010916	0.000726119	5.15762	0.0816457	0.00544304	-3.57918	0.316448	0.0210965	7.49368	10.9938	0.732921	-0.69926	0.081464	0.00541891	-0.0521458	0.315744	0.021003	3.1093	10.9694	0.72967	-5.53332e-05	-0.000386066	-9.52512e-05	-0.000178883	-0.847577	0.00566373	-0.11906	1.05839	0.924622	-0.698337	0.185506	0.198331	448	-0.0229943	-0.0101685
PL6556	ETH-2	2022-09-28	-10.2023	0.0132878	0.00113942	-18.705	0.0268904	0.00230584	7.23677	0.0132878	0.00113942	-1.82004	0.0268904	0.00230584	4.94349	0.120305	0.0103542	-3.7244	0.445747	0.0383638	11.2536	12.8762	1.10821	-0.718226	0.119859	0.0102778	-0.0878841	0.444093	0.0380807	7.10739	12.8284	1.10003	-5.53332e-05	-0.000386066	-9.52512e-05	-0.000178883	-0.847577	0.00566373	-0.11906	1.05839	0.924622	-0.717342	0.165391	0.187764	454	-0.0431086	-0.020736
PL6580_20v	ETH-2	2022-10-06	-10.117	0.0131311	0.00127541	-18.6812	0.0248325	0.00241195	7.31872	0.0131311	0.00127541	-1.79591	0.0248325	0.00241195	5.08029	0.0944911	0.00922138	-3.60467	0.336896	0.0328777	12.4301	8.47754	0.827324	-0.689833	0.09404	0.00913397	-0.0160645	0.335288	0.032566	8.1437	8.43708	0.819482	-5.53332e-05	-0.000386066	-9.52512e-05	-0.000178883	-0.847577	0.00566373	-0.11906	1.05839	0.924622	-0.688924	0.195469	0.218936	462	-0.013031	0.010436
PL6621_20V	ETH-2	2022-10-18	-10.0357	0.0166613	0.00135588	-18.8007	0.0313258	0.00254925	7.39182	0.0166613	0.00135588	-1.91624	0.0313258	0.00254925	5.03758	0.11048	0.00902066	-3.67253	0.352778	0.0288042	19.5539	14.8406	1.21173	-0.688679	0.110111	0.00896072	0.15695	0.3516	0.0286128	15.3993	14.7911	1.20368	-5.53332e-05	-0.000386066	-9.52512e-05	-0.000178883	-0.847577	0.00566373	-0.11906	1.05839	0.924622	-0.687778	0.196682	0.216346	474	-0.0118184	0.00784611
PL6652	ETH-2	2022-10-25	-10.1038	0.0349305	0.0031755	-18.8138	0.078706	0.00715509	7.32662	0.0349305	0.0031755	-1.92954	0.078706	0.00715509	4.9461	0.195816	0.0178755	-3.57027	0.529827	0.0483664	13.1703	8.93791	0.815916	-0.699819	0.194998	0.0177271	0.286267	0.527615	0.047965	9.13775	8.90059	0.809145	-5.53332e-05	-0.000386066	-9.52512e-05	-0.000178883	-0.847577	0.00566373	-0.11906	1.05839	0.924622	-0.698935	0.184874	0.20249	481	-0.0236265	-0.00601037
PL6717_20V	ETH-2	2022-11-11	-9.97733	0.0341948	0.00310862	-18.5042	0.0728973	0.00662702	7.45775	0.0341948	0.00310862	-1.6172	0.0728973	0.00662702	5.40682	0.151615	0.0138405	-3.22877	0.398585	0.0363857	12.9129	11.0614	1.00976	-0.683392	0.150982	0.0137256	0.00309027	0.396921	0.0360837	8.12144	11.0152	1.00138	-0.000109724	-0.00037476	-0.000220846	-0.00023511	-0.849122	0.0168403	-0.111798	1.04381	0.914073	-0.682121	0.202067	0.21984	498	-0.00643345	0.0113399
PL6912	ETH-2	02/13/23	-10.0565	0.00755268	0.000614629	-18.5983	0.0139409	0.0011345	7.37919	0.00755268	0.000614629	-1.71221	0.0139409	0.0011345	5.19367	0.121034	0.00988237	-3.4108	0.475638	0.0388357	4.96701	6.18646	0.505122	-0.721382	0.12063	0.00981671	0.0107985	0.47405	0.0385776	0.483323	6.1658	0.501766	-0.0012388	-0.000729716	-0.000778157	-0.000915559	-0.882144	-0.00582061	-0.12269	1.0252	0.930967	-0.716627	0.196281	0.176756	590	-0.0122192	-0.031744
PL6917	ETH-2	02/24/23	-9.94938	0.00655907	0.000596279	-18.5308	0.012937	0.00117609	7.48338	0.00655907	0.000596279	-1.64393	0.012937	0.00117609	5.37813	0.128342	0.0117159	-3.64568	0.489437	0.0446793	-4.13714	6.4673	0.590381	-0.711844	0.127806	0.0116187	-0.361633	0.487393	0.0443085	-8.82271	6.4403	0.585482	-0.00117393	-0.000773961	-0.000802017	-0.000916635	-0.880969	-0.00523738	-0.121933	1.02585	0.930325	-0.706915	0.205138	0.186607	593	-0.00336175	-0.0218927
PL6944	ETH-2	02/27/23	-9.98093	0.0059743	0.000626277	-18.4074	0.0101481	0.00106381	7.45774	0.0059743	0.000626277	-1.51959	0.0101481	0.00106381	5.49201	0.0927786	0.00977972	-3.01194	0.415417	0.0437888	6.85134	7.5238	0.793078	-0.694769	0.0922617	0.00967165	0.0250671	0.413102	0.0433049	1.89605	7.48189	0.784315	-0.000984331	-0.00087897	-0.000857678	-0.000906993	-0.875144	-0.00413501	-0.125465	1.03397	0.931883	-0.689788	0.218665	0.203979	604	0.0101645	-0.00452077
PL6950	ETH-2	03/10/23	-9.97217	0.00633431	0.000575846	-18.0032	0.0134269	0.00122063	7.63822	0.00633431	0.000575846	-1.11185	0.0134269	0.00122063	6.11049	0.110145	0.0100548	-2.39537	0.388537	0.0354684	6.16249	9.13742	0.834128	-0.66608	0.109685	0.00997134	-0.173209	0.386915	0.0351741	0.216699	9.09927	0.827206	-0.000967742	-0.000865992	-0.000857669	-0.000897134	-0.872452	-0.00458791	-0.124708	1.03734	0.931977	-0.660598	0.246712	0.233588	607	0.0382121	0.0250881
PL6979	ETH-2	03/14/23	-9.9595	0.00601817	0.000584536	-18.313	0.0085667	0.000832071	7.48145	0.00601817	0.000584536	-1.42448	0.0085667	0.000832071	5.63485	0.0807386	0.00787928	-2.76351	0.357244	0.0348634	9.03446	7.13603	0.696405	-0.670661	0.0803532	0.0078046	0.0837234	0.355538	0.034533	3.85532	7.10197	0.689804	-0.000906916	-0.000818407	-0.000857634	-0.000860986	-0.854552	-0.00624854	-0.140488	1.06946	0.94254	-0.665809	0.230481	0.228302	618	0.0219807	0.0198019
PL6981	ETH-2	03/26/23	-9.97768	0.00531638	0.000609831	-18.401	0.00957256	0.00109805	7.46106	0.00531638	0.000609831	-1.51313	0.00957256	0.00109805	5.50665	0.0759795	0.00877335	-2.22915	0.728011	0.0840635	31.1938	19.2257	2.22	-0.689974	0.0754712	0.00865714	0.7973	0.723142	0.08295	26.1021	19.0971	2.19059	-0.000884797	-0.000801103	-0.000857621	-0.000847841	-0.857097	-0.00685241	-0.140488	1.0666	0.942703	-0.685305	0.211757	0.208527	622	0.00325724	2.67347e-05
PL6999	ETH-2	04/06/23	-9.97002	0.00770847	0.000660996	-18.3553	0.0124067	0.00106387	7.46995	0.00770847	0.000660996	-1.46709	0.0124067	0.00106387	5.56428	0.110749	0.00764242	-3.37889	0.415434	0.0286677	-9.42615	7.66754	0.529111	-0.689699	0.110168	0.00944683	-0.475625	0.41191	0.035321	-14.7618	7.78906	0.667906	-0.000818441	-0.000749192	-0.000857583	-0.000808406	-0.864729	-0.00866401	-0.140488	1.05808	0.943182	-0.685201	0.218184	0.208633	634	0.00968385	0.000132547
PL7023	ETH-2	04/18/23	-9.956	0.00689799	0.000669992	-18.1836	0.0125663	0.00122055	7.48934	0.00689799	0.000669992	-1.29402	0.0125663	0.00122055	5.76871	0.0958639	0.00935536	-2.61689	0.406315	0.0396523	10.2888	15.6264	1.52498	-0.674071	0.0954063	0.00926668	-0.0305344	0.404376	0.0392764	4.83686	15.5518	1.51052	-0.000816429	-0.00087897	-0.000857567	-0.000850989	-0.847556	-0.00413501	-0.140488	1.07701	0.941787	-0.669162	0.221094	0.224901	645	0.0125944	0.016401
PL7050	ETH-2	04/26/23	-9.97854	0.00650548	0.000529409	-18.3087	0.0110686	0.000900753	7.4635	0.00650548	0.000529409	-1.42013	0.0110686	0.000900753	5.61977	0.0845515	0.0069036	-2.70387	0.485583	0.0396477	6.90979	8.84286	0.722016	-0.671558	0.0842692	0.00685773	0.134818	0.483962	0.0393842	1.75201	8.81333	0.717219	-0.000867701	-0.000827059	-0.000857567	-0.000850776	-0.855188	-0.00594661	-0.140488	1.06835	0.942288	-0.666776	0.229935	0.227321	657	0.0214352	0.0188211
P4894	ETH-3	2021-08-10	1.71706	0.0077393	0.000811299	-1.80008	0.0132755	0.00139165	19.1641	0.0077393	0.000811299	15.246	0.0132755	0.00139165	34.6812	0.120855	0.0127392	30.3609	0.564155	0.0594672	30.8918	11.3314	1.19444	-0.368478	0.120182	0.0125985	-0.352586	0.561012	0.05881	-19.3534	11.2683	1.18124	-0.00240034	-0.00161619	-0.00158414	-0.00186689	-0.861903	-0.0212352	-0.129189	1.06647	0.945464	-0.303732	0.621543	0.629945	40	0.00834302	0.0167454
P4906	ETH-3	2021-08-03	1.85495	0.00746165	0.000782193	-2.29398	0.0122247	0.00128149	19.2779	0.00746165	0.000782193	14.7485	0.0122247	0.00128149	34.2791	3.29249	0.347059	31.0729	15.0482	1.58622	43.4903	278.866	29.395	-0.390419	3.27414	0.343224	1.31941	14.9644	1.56869	-6.53046	277.312	29.0702	-0.00240034	-0.00161619	-0.00158414	-0.00186689	-0.861903	-0.0212352	-0.129189	1.06647	0.945464	-0.326424	0.597343	0.604504	33	-0.0158571	-0.00869565
P5006	ETH-3	2021-09-15	1.5275	0.00865621	0.000907417	-2.06296	0.0149386	0.00156599	18.9746	0.00865621	0.000907417	14.9806	0.0149386	0.00156599	34.2419	0.134229	0.014149	29.6009	0.439416	0.0463185	20.462	7.73307	0.815137	-0.344347	0.133481	0.0139927	-0.567528	0.436968	0.0458067	-28.5837	7.68999	0.80613	-0.00231954	-0.00185654	-0.00175255	-0.00197621	-0.865114	-0.0107922	-0.131801	1.05516	0.940023	-0.276677	0.648084	0.618843	76	0.0348841	0.00564347
P5041	ETH-3	2021-09-22	1.42955	0.00781665	0.000819407	-2.39306	0.0131225	0.00137562	18.8699	0.00781665	0.000819407	14.6477	0.0131225	0.00137562	33.8102	0.137617	0.0145061	28.9766	0.560298	0.0590606	24.3888	9.54624	1.00626	-0.333246	0.13685	0.0143458	-0.517836	0.557176	0.0584079	-24.1098	9.49306	0.995143	-0.00231954	-0.00185654	-0.00175255	-0.00197621	-0.865114	-0.0107922	-0.131801	1.05516	0.940023	-0.266429	0.658897	0.638235	83	0.0456974	0.0250347
P5109	ETH-3	2021-10-12	1.13185	0.00828599	0.000868608	-2.88437	0.0143803	0.00150746	18.5697	0.00828599	0.000868608	14.1518	0.0143803	0.00150746	32.9301	0.126171	0.0132996	26.1694	0.671561	0.0707887	-6.29561	7.35354	0.775131	-0.400213	0.125468	0.0131526	-2.2696	0.66782	0.0700065	-52.1339	7.31257	0.766565	-0.00231954	-0.00185654	-0.00175255	-0.00197621	-0.865114	-0.0107922	-0.131801	1.05516	0.940023	-0.335136	0.586401	0.570994	103	-0.0267991	-0.0422058
P5133	ETH-3	2021-10-12	1.16793	0.00823388	0.000863145	-2.81219	0.0135733	0.00142287	18.6065	0.00823388	0.000863145	14.2246	0.0135733	0.00142287	33.0715	0.133591	0.0140818	27.6294	0.426901	0.0449993	14.6528	6.65594	0.701598	-0.371278	0.132847	0.0139262	-0.993496	0.424523	0.0445021	-32.3257	6.61886	0.693845	-0.00231954	-0.00185654	-0.00175255	-0.00197621	-0.865114	-0.0107922	-0.131801	1.05516	0.940023	-0.305922	0.617226	0.61688	103	0.00402635	0.00368048
P5509	ETH-3	2022-01-10	1.68788	0.00768865	0.000805989	-1.75806	0.0154264	0.00161713	19.1378	0.00768865	0.000805989	15.2883	0.0154264	0.00161713	34.7639	0.138799	0.0146307	30.4775	0.535098	0.0564043	34.9043	12.0908	1.27449	-0.302995	0.138026	0.0144691	-0.322771	0.532117	0.0557811	-15.59	12.0235	1.2604	-0.00064187	-0.000686345	-0.00052657	-0.000618262	-0.852818	0.000561792	-0.110696	1.05145	0.923091	-0.281502	0.627106	0.627621	193	0.013906	0.0144209
P5557	ETH-3	2022-02-17	1.75225	0.00796689	0.000835157	-1.6299	0.0140496	0.0014728	19.2035	0.00796689	0.000835157	15.4177	0.0140496	0.0014728	34.9685	0.126006	0.0132822	30.6854	0.465341	0.0490512	33.3235	11.1665	1.17705	-0.296963	0.125304	0.0131354	-0.375747	0.462748	0.0485092	-17.4072	11.1042	1.16404	-0.00064187	-0.000686345	-0.00052657	-0.000618262	-0.852818	0.000561792	-0.110696	1.05145	0.923091	-0.275343	0.633581	0.634634	231	0.0203813	0.0214338
P5626	ETH-3	2022-02-13	1.80943	0.00929955	0.00069123	-1.61432	0.0149353	0.00111013	19.2584	0.00929955	0.00069123	15.4335	0.0149353	0.00111013	35.0103	0.119773	0.00892735	30.9855	0.590399	0.0440057	44.9788	17.1705	1.27982	-0.327516	0.11944	0.00887789	-0.115832	0.588757	0.0437619	-6.41159	17.1228	1.27273	-0.00036694	-0.000686345	-0.000545255	-0.000532847	-0.857315	0.000561792	-0.111394	1.04599	0.923151	-0.308861	0.600084	0.577758	227	-0.0131158	-0.035442
PL5664_20V	ETH-3	2022-02-22	1.71981	0.0262628	0.00275309	-1.77623	0.0468343	0.00490956	19.1675	0.0262628	0.00275309	15.2701	0.0468343	0.00490956	34.7788	0.094469	0.00995791	31.1407	0.550708	0.0580497	67.1568	21.639	2.28095	-0.300995	0.0939427	0.00984787	0.356557	0.54764	0.0574083	15.0931	21.5184	2.25575	-0.00036694	-0.000466169	-0.000545255	-0.000459455	-0.857315	0.00384712	-0.111394	1.04345	0.921186	-0.285016	0.623788	0.616392	236	0.0105876	0.00319216
PL5685	ETH-3	2022-02-26	1.71397	0.00854454	0.000895711	-1.84934	0.016761	0.00175703	19.1594	0.00854454	0.000895711	15.1964	0.016761	0.00175703	34.6913	0.12295	0.01296	30.6858	0.574252	0.0605315	52.4044	17.074	1.79976	-0.305938	0.122265	0.0128168	0.0604066	0.571053	0.0598626	1.21174	16.9789	1.77987	-0.00036694	-0.000466169	-0.000545255	-0.000459455	-0.857315	0.00384712	-0.111394	1.04345	0.921186	-0.289999	0.618588	0.609356	240	0.00538839	-0.00384391
PL5743	ETH-3	2022-03-11	1.55613	0.0129607	0.00135865	-2.18267	0.0177859	0.00186447	18.9977	0.0129607	0.00135865	14.86	0.0177859	0.00186447	34.1896	0.113744	0.0119896	30.151	0.577862	0.060912	62.2773	25.5131	2.68932	-0.301378	0.11311	0.0118572	0.204215	0.574643	0.0602389	11.4338	25.371	2.6596	-0.00036694	0.000251592	-2.89789e-05	-4.8109e-05	-0.857315	0.00731103	-0.116563	1.04326	0.921719	-0.299733	0.60902	0.60368	253	-0.00418017	-0.00952031
PL5837_20V	ETH-3	2022-04-01	1.67854	0.00830431	0.000754937	-1.45277	0.0182699	0.0016609	19.1396	0.00830431	0.000754937	15.5961	0.0182699	0.0016609	35.0758	0.0905589	0.00826686	31.9706	0.525416	0.0479637	209.716	44.8144	4.09098	-0.301339	0.0901807	0.00819825	0.519085	0.523223	0.0475657	150.005	44.6273	4.05703	4.90911e-05	0.000251592	-2.89789e-05	9.05682e-05	-0.854438	0.00731103	-0.116563	1.04694	0.921901	-0.304516	0.603091	0.582619	274	-0.0101092	-0.030581
PL5859	ETH-3	2022-04-06	1.69086	0.00886348	0.000929145	-1.46767	0.0155372	0.00162874	19.1508	0.00886348	0.000929145	15.5811	0.0155372	0.00162874	35.0849	0.126798	0.0133656	32.0339	0.587015	0.0618768	185.499	62.1234	6.54838	-0.289431	0.126091	0.013218	0.610079	0.583745	0.0611931	127.003	61.7773	6.47602	4.90911e-05	0.000251592	-2.89789e-05	9.05682e-05	-0.854438	0.00731103	-0.116563	1.04694	0.921901	-0.292609	0.615557	0.605293	279	0.00235712	-0.00790716
PL5900	ETH-3	2022-04-16	1.70786	0.010109	0.000918997	-1.63115	0.0157869	0.00143517	19.1612	0.010109	0.000918997	15.4163	0.0157869	0.00143517	34.9165	0.136947	0.0125015	31.649	0.673418	0.0614744	156.98	45.885	4.18871	-0.303144	0.136375	0.0123977	0.561495	0.670606	0.0609642	100.23	45.6934	4.15395	-0.000194183	0.000806872	-6.39664e-06	0.000202097	-0.857932	0.0126176	-0.118609	1.03919	0.919492	-0.3102	0.597135	0.592879	289	-0.0160649	-0.0203211
PL5931_20V	ETH-3	2022-04-23	1.79797	0.0297547	0.0024214	-1.82904	0.0549663	0.0044731	19.24	0.0297547	0.0024214	15.217	0.0549663	0.0044731	34.8308	0.122681	0.0100169	31.6411	0.783463	0.0639695	202.815	63.4822	5.1833	-0.272704	0.122272	0.00995034	0.946697	0.780847	0.0635445	144.164	63.2702	5.14886	-0.000194183	0.000806872	-6.39664e-06	0.000202097	-0.857932	0.0126176	-0.118609	1.03919	0.919492	-0.279743	0.628786	0.630135	296	0.0155858	0.0169345
PL6655	ETH-3	2022-10-27	1.64391	0.0426618	0.00365822	-1.82172	0.0795599	0.0068222	19.0938	0.0426618	0.00365822	15.2241	0.0795599	0.0068222	34.6673	0.183092	0.0157581	31.9057	0.704771	0.060657	210.656	64.1581	5.52185	-0.28954	0.182413	0.0156418	1.1895	0.702156	0.0602094	151.782	63.92	5.4811	-0.000194183	0.000806872	-6.39664e-06	0.000202097	-0.857932	0.0126176	-0.118609	1.03919	0.919492	-0.296546	0.611324	0.612191	299	-0.00187577	-0.00100919
PL5989_20V	ETH-3	2022-05-08	1.7403	0.0295677	0.00240618	-1.56574	0.0567283	0.00461648	19.1944	0.0295677	0.00240618	15.4823	0.0567283	0.00461648	35.0431	0.117493	0.00959326	32.2669	0.631722	0.0515799	231.789	63.818	5.21072	-0.278267	0.117101	0.00952952	1.03056	0.629613	0.0512372	171.179	63.6049	5.17609	-0.000194183	0.000806872	-6.39664e-06	0.000202097	-0.857932	0.0126176	-0.118609	1.03919	0.919492	-0.28535	0.62296	0.612274	311	0.00975986	-0.000926191
PL6002_20V	ETH-3	2022-05-11	1.67701	0.0285582	0.00299372	-1.76356	0.0529335	0.00554894	19.1273	0.0285582	0.00299372	15.2828	0.0529335	0.00554894	34.7948	0.120387	0.0126899	31.793	0.639527	0.0674121	196.565	64.2426	6.77177	-0.257039	0.119717	0.0125497	0.964429	0.635965	0.0666672	138.208	63.8847	6.69694	-0.000194183	0.000806872	-6.39664e-06	0.000202097	-0.857932	0.0126176	-0.118609	1.03919	0.919492	-0.264071	0.645072	0.621376	314	0.0318722	0.0081759
PL6032_20V	ETH-3	2022-05-17	1.72781	0.0305222	0.00203031	-1.67434	0.0541561	0.00360241	19.1787	0.0305222	0.00203031	15.3728	0.0541561	0.00360241	34.9102	0.120019	0.00800129	32.4375	1.03092	0.0687283	215.57	98.6508	6.57672	-0.284771	0.119752	0.00796581	1.41197	1.02863	0.0684235	156.023	98.4313	6.54755	-0.000194183	0.000806872	-6.39664e-06	0.000202097	-0.857932	0.0126176	-0.118609	1.03919	0.919492	-0.291826	0.61623	0.593426	320	0.00302956	-0.0197742
PL6048_20V	ETH-3	2022-05-20	1.79192	0.0273964	0.00249058	-1.35437	0.0462196	0.00420178	19.2509	0.0273964	0.00249058	15.6955	0.0462196	0.00420178	35.3224	0.112033	0.0102272	32.63	0.75013	0.0684772	224.641	69.9375	6.38439	-0.27202	0.111565	0.0101423	0.962428	0.746998	0.0679089	163.834	69.6455	6.33141	-0.000194183	0.000806872	-6.39664e-06	0.000202097	-0.857932	0.0126176	-0.118609	1.03919	0.919492	-0.279159	0.629393	0.606417	323	0.0161932	-0.00678278
PL6094	ETH-3	2022-05-30	1.62707	0.0126103	0.00114639	-1.70557	0.0250064	0.00227331	19.0818	0.0126103	0.00114639	15.3411	0.0250064	0.00227331	34.7975	0.146458	0.0133697	31.3058	0.543596	0.0496233	130.009	48.3694	4.4155	-0.264916	0.145846	0.0132588	0.376722	0.541326	0.0492115	74.8277	48.1674	4.37886	-0.000132116	0.000546876	9.47915e-05	0.00016985	-0.869405	0.0175237	-0.109944	1.01721	0.911718	-0.270826	0.636231	0.614856	333	0.0230315	0.00165575
PL6314	ETH-3	2022-07-21	2.41971	0.0192006	0.00201277	3.6859	0.0320805	0.00336295	20.024	0.0192006	0.00201277	20.7776	0.0320805	0.00336295	41.2116	0.102114	0.0107637	42.9308	0.507455	0.0534904	248.555	48.7095	5.13443	-0.289182	0.101545	0.0106448	0.905992	0.504628	0.0528993	174.03	48.4381	5.0777	-0.000194183	0.000806872	-6.39664e-06	0.000202097	-0.857932	0.0126176	-0.118609	1.03919	0.919492	-0.297511	0.610322	0.606345	289	-0.00287789	-0.00685541
PL6116	ETH-3	2022-06-03	1.6892	0.0190385	0.00173078	-1.72858	0.0357356	0.00324869	19.1401	0.0190385	0.00173078	15.3181	0.0357356	0.00324869	34.8198	0.120402	0.0109911	30.9027	0.403281	0.0368143	135.574	64.5332	5.89105	-0.280057	0.119899	0.0108999	0.0312189	0.401597	0.0365088	80.1034	64.2637	5.84216	-0.000388754	-0.000230359	9.47915e-05	-0.000174774	-0.860283	-0.00273424	-0.109944	1.04396	0.92417	-0.273971	0.638155	0.628537	337	0.0249552	0.0153365
PL6145	ETH-3	2022-06-09	1.53727	0.0314986	0.00330195	-2.2644	0.0612327	0.00641893	18.9769	0.0314986	0.00330195	14.7776	0.0612327	0.00641893	34.0707	0.157753	0.0166286	29.7201	0.549129	0.0578833	276.835	303.694	32.0122	-0.31545	0.156874	0.0164449	-0.0517315	0.54607	0.0572437	215.943	302.002	31.6584	-0.000388754	-0.000230359	9.47915e-05	-0.000174774	-0.860283	-0.00273424	-0.109944	1.04396	0.92417	-0.309496	0.601069	0.59188	343	-0.0121313	-0.0213199
PL6174	ETH-3	2022-06-15	1.77361	0.0176659	0.00143763	-1.75256	0.0341873	0.00278212	19.2195	0.0176659	0.00143763	15.2941	0.0341873	0.00278212	34.8551	0.128369	0.0104812	31.1019	0.540719	0.0441495	426.878	1312.56	107.17	-0.303039	0.12794	0.0104116	0.271657	0.538914	0.0438562	357.128	1308.18	106.458	-0.000388754	-0.000230359	9.47915e-05	-0.000174774	-0.860283	-0.00273424	-0.109944	1.04396	0.92417	-0.296948	0.614169	0.604388	349	0.000968553	-0.00881163
PL6191	ETH-3	2022-06-20	1.79753	0.0170745	0.0017899	-1.65612	0.0301506	0.00316064	19.2456	0.0170745	0.0017899	15.3913	0.0301506	0.00316064	35.0239	0.145766	0.0153651	31.2489	0.418269	0.0440894	808.388	3895.22	410.592	-0.260661	0.144954	0.0151953	0.222583	0.415938	0.0436022	719.618	3873.52	406.055	-0.000388754	-0.000230359	9.47915e-05	-0.000174774	-0.860283	-0.00273424	-0.109944	1.04396	0.92417	-0.254539	0.658441	0.649544	354	0.0452411	0.036344
PL6195	ETH-3	2022-06-21	1.70458	0.0166374	0.00151249	-1.89869	0.0237715	0.00216105	19.1488	0.0166374	0.00151249	15.1466	0.0237715	0.00216105	34.6773	0.132357	0.0120825	30.8484	0.518545	0.0473365	5558.6	31138.1	2842.5	-0.260511	0.131804	0.0119822	0.316325	0.51638	0.0469436	5240.23	31008	2818.91	-0.000388754	-0.000230359	9.47915e-05	-0.000174774	-0.860283	-0.00273424	-0.109944	1.04396	0.92417	-0.25445	0.658534	0.649639	355	0.045334	0.0364387
PL6202	ETH-3	2022-07-13	1.83499	0.0540871	0.00386336	-1.44967	0.0319321	0.00228087	19.2885	0.0540871	0.00386336	15.5995	0.0319321	0.00228087	35.2644	0.141103	0.0101046	31.6769	0.435622	0.0311956	468.323	440.373	31.5358	-0.273194	0.14074	0.0100529	0.227524	0.434504	0.031036	395.621	439.243	31.3745	-0.000388754	-0.000230359	9.47915e-05	-0.000174774	-0.860283	-0.00273424	-0.109944	1.04396	0.92417	-0.267031	0.6454	0.625476	377	0.0322002	0.012276
PL6230	ETH-3	2022-06-29	1.79876	0.0226786	0.00220275	-1.54499	0.035194	0.00341835	19.2507	0.0226786	0.00220275	15.5033	0.035194	0.00341835	35.0852	0.133954	0.0130726	31.0123	0.45404	0.0443098	43.7575	15.4232	1.50515	-0.314953	0.133315	0.0129487	-0.227458	0.451873	0.0438898	-7.69896	15.3496	1.49089	-0.000388754	-0.000230359	9.47915e-05	-0.000174774	-0.860283	-0.00273424	-0.109944	1.04396	0.92417	-0.308821	0.601773	0.584448	363	-0.0114273	-0.0287518
PL6254	ETH-3	2022-07-05	1.76079	0.0574989	0.00427386	-1.68787	0.0925544	0.00687951	19.2096	0.0574989	0.00427386	15.3592	0.0925544	0.00687951	34.9267	0.171118	0.0127543	31.0431	0.549788	0.0409788	51.5012	17.139	1.27747	-0.286991	0.170642	0.0126837	0.0861816	0.548259	0.0407518	-0.0152445	17.0913	1.27039	-0.000388754	-0.000903433	9.47915e-05	-0.000399132	-0.860283	-0.00819313	-0.109944	1.0481	0.927418	-0.27305	0.641236	0.624539	369	0.0280356	0.0113393
PL6296	ETH-3	2022-07-16	1.76268	0.0673845	0.00612587	-1.72173	0.12819	0.0116536	19.2102	0.0673845	0.00612587	15.3251	0.12819	0.0116536	34.8909	0.225311	0.020568	31.2104	0.673816	0.0615107	62.1337	26.6356	2.43149	-0.289152	0.224371	0.0203973	0.315734	0.671002	0.0610002	10.1624	26.5244	2.41131	-0.000680888	-0.000903433	-0.000213651	-0.000599324	-0.866217	-0.00819313	-0.120262	1.04586	0.932356	-0.268241	0.651812	0.60963	380	0.0386122	-0.00356983
PL6349	ETH-3	2022-07-31	1.79886	0.0188442	0.00153352	-1.58258	0.0530787	0.00431948	19.2495	0.0188442	0.00153352	15.4655	0.0530787	0.00431948	35.0195	0.166625	0.0136048	31.2768	0.526109	0.0429567	64.9204	21.6603	1.76856	-0.340561	0.166068	0.0135144	0.103667	0.524353	0.0426712	12.4962	21.588	1.75681	-0.000680888	-0.000903433	-0.000213651	-0.000599324	-0.866217	-0.00819313	-0.120262	1.04586	0.932356	-0.319573	0.598127	0.575703	395	-0.0150733	-0.0374969
PL6360_20V	ETH-3	2022-08-03	1.78554	0.0612811	0.00498698	-1.60359	0.119908	0.00975798	19.2361	0.0612811	0.00498698	15.4442	0.119908	0.00975798	35.0351	0.194194	0.0158559	31.101	0.395552	0.0322967	51.0301	15.3318	1.25183	-0.291336	0.193546	0.0157506	-0.0250939	0.394231	0.0320821	-0.655309	15.2806	1.24352	-0.000680888	-0.000903433	-0.000213651	-0.000599324	-0.866217	-0.00819313	-0.120262	1.04586	0.932356	-0.270339	0.649618	0.637953	398	0.0364184	0.0247535
PL6387_20V	ETH-3	2022-08-12	1.86981	0.0325025	0.00315692	-1.50034	0.0646908	0.00628333	19.3198	0.0325025	0.00315692	15.5485	0.0646908	0.00628333	35.1946	0.1237	0.0120719	31.0499	0.329344	0.0321407	37.6146	9.65339	0.942074	-0.322966	0.123109	0.0119574	-0.279925	0.327772	0.031836	-13.6966	9.60731	0.933144	-0.000416868	-0.0011208	-0.000370242	-0.000635971	-0.855429	-0.0110549	-0.11906	1.06156	0.93433	-0.300583	0.615243	0.601361	407	0.00204307	-0.0118387
PL6407_20V	ETH-3	2022-08-18	1.80179	0.0214069	0.00194608	-1.58398	0.0531263	0.00482967	19.2522	0.0214069	0.00194608	15.4641	0.0531263	0.00482967	35.0614	0.131019	0.0119603	30.3926	0.347104	0.0316861	19.2897	11.3812	1.03896	-0.301434	0.130472	0.0118611	-0.751059	0.345655	0.0314232	-30.8884	11.3337	1.03034	-0.000416868	-0.0011208	-0.000370242	-0.000635971	-0.855429	-0.0110549	-0.11906	1.06156	0.93433	-0.279136	0.63801	0.630357	413	0.0248102	0.0171566
PL6440_20V	ETH-3	2022-08-27	1.82341	0.00699588	0.000635989	-1.53211	0.0119697	0.00108815	19.2746	0.00699588	0.000635989	15.5164	0.0119697	0.00108815	35.1309	0.0889426	0.00811932	30.8375	0.331536	0.0302649	25.6113	6.83964	0.62437	-0.307585	0.0885713	0.00805193	-0.422604	0.330152	0.0300138	-24.9996	6.81108	0.619189	-0.000416868	-0.0011208	-0.000370242	-0.000635971	-0.855429	-0.0110549	-0.11906	1.06156	0.93433	-0.285243	0.631528	0.62248	422	0.0183278	0.00928012
PL6456_20V	ETH-3	2022-08-31	1.84578	0.00809709	0.00069432	-1.62867	0.022462	0.0019261	19.2925	0.00809709	0.00069432	15.4191	0.022462	0.0019261	35.0351	0.0957582	0.00824156	30.915	0.354456	0.0305067	50.1426	12.8405	1.10514	-0.324051	0.0954029	0.00818073	-0.15595	0.353141	0.0302816	-1.50951	12.7929	1.09698	-0.000416868	-0.0011208	-0.000370242	-0.000635971	-0.855429	-0.0110549	-0.11906	1.06156	0.93433	-0.301769	0.613984	0.608526	426	0.000783901	-0.00467414
PL6484_20V	ETH-3	2022-09-07	1.78305	0.0111829	0.00101663	-1.69009	0.0204124	0.00185568	19.2307	0.0111829	0.00101663	15.357	0.0204124	0.00185568	34.9184	0.0840108	0.0076691	30.9989	0.419874	0.0383291	62.489	15.948	1.45584	-0.314198	0.08366	0.00760545	0.0476288	0.418121	0.038011	10.4163	15.8814	1.44376	-0.000416868	-0.0011208	-0.000370242	-0.000635971	-0.855429	-0.0110549	-0.11906	1.06156	0.93433	-0.291991	0.624364	0.623362	433	0.011164	0.0101618
PL6512	ETH-3	2022-09-14	1.81639	0.022417	0.00192224	-1.67432	0.0443059	0.0037992	19.2629	0.022417	0.00192224	15.373	0.0443059	0.0037992	34.9546	0.130653	0.0112448	30.8829	0.571628	0.0491979	53.953	16.5281	1.42251	-0.327293	0.130168	0.0111618	-0.0962701	0.569507	0.0488348	2.23384	16.4668	1.41201	-0.000416868	-0.0011208	-0.000370242	-0.000635971	-0.855429	-0.0110549	-0.11906	1.06156	0.93433	-0.305063	0.610488	0.61459	440	-0.00271194	0.00139028
PL6545	ETH-3	2022-09-24	1.57721	0.0202274	0.0021204	-1.44908	0.0381444	0.00399862	19.0434	0.0202274	0.0021204	15.5996	0.0381444	0.00399862	34.9479	0.14691	0.0154856	31.0534	0.500543	0.0527619	30.2675	11.8164	1.24556	-0.330907	0.146091	0.0153145	-0.377067	0.497755	0.0521789	-20.4939	11.7506	1.2318	-5.53332e-05	-0.000386066	-9.52512e-05	-0.000178883	-0.847577	0.00566373	-0.11906	1.05839	0.924622	-0.324655	0.581009	0.596555	450	-0.0321909	-0.0166448
PL6560_20V	ETH-3	2022-09-29	1.67132	0.0166839	0.00124011	-1.67904	0.0270312	0.00200922	19.1248	0.0166839	0.00124011	15.3679	0.0270312	0.00200922	34.8258	0.0988413	0.0073672	31.0965	0.470071	0.035037	70.1968	21.7794	1.62334	-0.307092	0.0985664	0.00732638	0.120896	0.468763	0.0348429	17.8375	21.7188	1.61435	-5.53332e-05	-0.000386066	-9.52512e-05	-0.000178883	-0.847577	0.00566373	-0.11906	1.05839	0.924622	-0.300862	0.606191	0.61278	455	-0.0070087	-0.000419578
PL6585_20V	ETH-3	2022-10-07	1.79219	0.0149936	0.00122016	-1.47483	0.0269265	0.00219125	19.2469	0.0149936	0.00122016	15.5741	0.0269265	0.00219125	35.1753	0.0886781	0.00724054	31.768	0.569699	0.0465158	83.3394	27.6425	2.257	-0.292543	0.088382	0.00719243	0.365994	0.567797	0.0462067	29.7947	27.5502	2.242	-5.53332e-05	-0.000386066	-9.52512e-05	-0.000178883	-0.847577	0.00566373	-0.11906	1.05839	0.924622	-0.286251	0.621656	0.615648	463	0.00845557	0.0024483
PL6605_20V	ETH-3	2022-10-13	1.79281	0.0138993	0.00126357	-1.5357	0.0250157	0.00227416	19.2454	0.0138993	0.00126357	15.5127	0.0250157	0.00227416	35.1131	0.0987279	0.00901259	31.1322	0.370978	0.0338655	51.5385	11.2396	1.02603	-0.291707	0.0983157	0.00893779	-0.129657	0.369429	0.0335845	-0.314127	11.1926	1.01751	-5.53332e-05	-0.000386066	-9.52512e-05	-0.000178883	-0.847577	0.00566373	-0.11906	1.05839	0.924622	-0.285426	0.622529	0.614333	469	0.0093293	0.00113267
PL6624_20V	ETH-3	2022-10-19	1.73289	0.0178388	0.00162171	-1.74528	0.0286754	0.00260685	19.1811	0.0178388	0.00162171	15.3013	0.0286754	0.00260685	34.8125	0.0901373	0.00822838	30.8562	0.378734	0.0345735	56.9027	15.6587	1.42944	-0.312304	0.089761	0.00816009	0.0190523	0.377153	0.0342866	5.2643	15.5934	1.41758	-5.53332e-05	-0.000386066	-9.52512e-05	-0.000178883	-0.847577	0.00566373	-0.11906	1.05839	0.924622	-0.306076	0.600673	0.611869	475	-0.0125275	-0.00133086
PL6696_20V	ETH-3	2022-11-06	1.81863	0.0150715	0.0012265	-1.5488	0.0359533	0.00292584	19.2695	0.0150715	0.0012265	15.4996	0.0359533	0.00292584	35.1517	0.128141	0.0104627	31.3397	0.498201	0.0406779	63.853	18.033	1.47239	-0.266003	0.127713	0.0103931	0.0975002	0.496537	0.0404076	11.3934	17.9728	1.4626	-5.53332e-05	-0.00037476	-0.000220846	-0.00021698	-0.847577	0.0168403	-0.111798	1.04579	0.914156	-0.258376	0.64395	0.649313	493	0.0307496	0.0361128
PL6892	ETH-3	02/27/23	1.78637	0.00699264	0.000733028	-1.62631	0.0122235	0.00128137	19.2361	0.00699264	0.000733028	15.4214	0.0122235	0.00128137	34.9746	0.12869	0.0135651	30.4285	0.521287	0.0549485	28.2396	7.94719	0.837707	-0.327646	0.127973	0.0134152	-0.632237	0.518383	0.0543413	-22.2817	7.90291	0.828451	-0.00141181	-0.00061173	-0.00080804	-0.00094386	-0.872275	-0.00371126	-0.129609	1.03922	0.933938	-0.294635	0.627747	0.604798	582	0.0145469	-0.00840159
PL6905	ETH-3	03/06/23	1.86233	0.00797667	0.000836183	-1.51612	0.0160316	0.00168057	19.3121	0.00797667	0.000836183	15.5326	0.0160316	0.00168057	35.1467	0.122543	0.0129172	30.4234	0.441258	0.0465127	14.2599	8.22861	0.867371	-0.346074	0.121861	0.0127745	-0.856028	0.438799	0.0459987	-35.8589	8.18276	0.857787	-0.00128206	-0.00070022	-0.00076225	-0.000914842	-0.882927	-0.00620943	-0.123194	1.02477	0.931394	-0.313921	0.609698	0.585236	588	-0.00350207	-0.0279639
PL6943	ETH-3	03/15/23	1.7955	0.00573695	0.000466867	-1.56088	0.00925485	0.000753149	19.247	0.00573695	0.000466867	15.4873	0.00925485	0.000753149	35.0693	0.0942631	0.00769655	30.4894	0.339024	0.0276812	19.9582	6.98498	0.570321	-0.311131	0.0939483	0.00764541	-0.702955	0.337892	0.0274973	-30.2913	6.96166	0.566532	-0.000989861	-0.000883295	-0.000857682	-0.000910279	-0.876041	-0.00398404	-0.125717	1.03285	0.931852	-0.279208	0.643473	0.620447	603	0.0302728	0.00724682
PL6952	ETH-3	03/20/23	1.77751	0.0084059	0.000684063	-1.56583	0.0111312	0.000905844	19.2298	0.0084059	0.000684063	15.4823	0.0111312	0.000905844	35.0316	0.118632	0.00968624	30.4006	0.391943	0.032002	15.6157	8.37344	0.683689	-0.325194	0.118236	0.00962188	-0.779216	0.390635	0.0317894	-34.3929	8.34549	0.679146	-0.000967742	-0.000865992	-0.000857669	-0.000897134	-0.872452	-0.00458791	-0.124708	1.03734	0.931977	-0.293766	0.627242	0.60568	607	0.0140418	-0.00751989
PL6967	ETH-3	03/30/23	1.82011	0.00616129	0.000645879	-1.25183	0.0106308	0.00111441	19.2812	0.00616129	0.000645879	15.7989	0.0106308	0.00111441	35.4157	0.10381	0.0109426	31.467	0.489702	0.0516191	35.2295	12.3291	1.2996	-0.312771	0.103232	0.0108217	-0.368534	0.486974	0.0510487	-16.4006	12.2604	1.28524	-0.000929035	-0.00083571	-0.000857647	-0.000874131	-0.852008	-0.00564467	-0.140488	1.07234	0.942375	-0.281813	0.640175	0.617804	614	0.026975	0.00460393
PL6986	ETH-3	04/11/23	1.82436	0.00707607	0.000643279	-1.50829	0.0123467	0.00112242	19.2763	0.00707607	0.000643279	15.5404	0.0123467	0.00112242	35.1471	0.0970048	0.00792041	32.0831	1.06738	0.0871512	64.1785	27.2542	2.22529	-0.307591	0.0990471	0.00900428	0.850758	1.10837	0.100761	13.6162	28.6316	2.60288	-0.000879268	-0.000796777	-0.000857618	-0.000844554	-0.857733	-0.00700338	-0.140488	1.06588	0.942743	-0.277907	0.646526	0.621766	623	0.0333264	0.00856601
PL6987	ETH-3	04/14/23	1.74231	0.00580451	0.000563784	-1.6843	0.0101569	0.00098652	19.1921	0.00580451	0.000563784	15.3628	0.0101569	0.00098652	34.8749	0.0725323	0.00707842	30.5769	0.402382	0.0392685	36.9144	12.5709	1.22679	-0.322838	0.072186	0.00701133	-0.373031	0.400461	0.0388962	-13.8762	12.5109	1.21516	-0.000851619	-0.000775148	-0.000857602	-0.000828123	-0.860913	-0.00775821	-0.140488	1.06233	0.942944	-0.293958	0.630666	0.605485	628	0.0174656	-0.00771453
PL7005	ETH-3	04/23/23	1.69544	0.00799191	0.00083778	-1.6541	0.0114767	0.00120308	19.1486	0.00799191	0.00083778	15.3931	0.0114767	0.00120308	34.875	0.113189	0.0119311	30.8094	0.549012	0.0578709	36.2423	11.0342	1.1631	-0.308069	0.112558	0.0117993	-0.207255	0.545953	0.0572315	-14.5284	10.9727	1.15025	-0.000796323	-0.000731888	-0.000857571	-0.000795261	-0.867274	-0.00926788	-0.140488	1.05527	0.943339	-0.280334	0.647511	0.619304	638	0.0343112	0.00610446
PL7034	ETH-3	04/27/23	1.84345	0.00728043	0.000763197	-1.40814	0.0127151	0.0013329	19.298	0.00728043	0.000763197	15.6414	0.0127151	0.0013329	35.2277	0.0966808	0.0101911	30.7417	0.664767	0.0700726	17.315	11.7602	1.23964	-0.358754	0.0961422	0.0100784	-0.761583	0.661064	0.0692983	-33.144	11.6947	1.22594	-0.000837792	-0.00085734	-0.000857567	-0.0008509	-0.850736	-0.00488984	-0.140488	1.07339	0.941998	-0.328779	0.589091	0.570165	650	-0.0241091	-0.0430349
PL7042	ETH-3	05/04/23	1.85267	0.00701568	0.000637789	-1.47069	0.0116557	0.00105961	19.3046	0.00701568	0.000637789	15.5784	0.0116557	0.00105961	35.1993	0.102122	0.00932243	30.9823	0.811338	0.0740647	33.3413	17.6998	1.61576	-0.331854	0.101696	0.00924506	-0.404243	0.80795	0.07345	-17.7996	17.6259	1.60235	-0.00085061	-0.000844362	-0.000857567	-0.000850847	-0.852644	-0.00534274	-0.140488	1.07123	0.942123	-0.301905	0.618715	0.597424	653	0.00551451	-0.015776
P4942	ETH-4	2021-08-26	-9.95269	0.00788255	0.000826315	-18.3712	0.0127134	0.00133273	7.48587	0.00788255	0.000826315	-1.48308	0.0127134	0.00133273	5.77769	0.114182	0.0120358	-3.13852	0.451144	0.0475548	-2.99547	4.77276	0.503093	-0.475581	0.113546	0.0119028	-0.175021	0.448631	0.0470293	-8.00312	4.74617	0.497534	-0.00240034	-0.00161619	-0.00158414	-0.00186689	-0.861903	-0.0212352	-0.129189	1.06647	0.945464	-0.464795	0.449775	0.44647	56	-0.00072464	-0.00402983
P5059	ETH-4	2021-09-25	-10.2237	0.00703189	0.000737142	-19.1918	0.0123463	0.00129425	7.19927	0.00703189	0.000737142	-2.31082	0.0123463	0.00129425	4.64998	0.111171	0.0117184	-5.22707	0.479057	0.0504971	-14.1991	7.65137	0.806525	-0.488571	0.110551	0.0115889	-0.613541	0.476388	0.0499391	-17.2528	7.60874	0.797613	-0.00231954	-0.00185654	-0.00175255	-0.00197621	-0.865114	-0.0107922	-0.131801	1.05516	0.940023	-0.479382	0.434199	0.453099	86	-0.0163013	0.00259901
P5010	ETH-4	2021-09-16	-10.359	0.00924042	0.00096866	-18.9067	0.0143963	0.00150914	7.08065	0.00924042	0.00096866	-2.02378	0.0143963	0.00150914	4.85602	0.137263	0.0144688	-3.75853	0.528373	0.0556954	7.77742	8.68292	0.91526	-0.444813	0.136498	0.0143089	0.286154	0.525429	0.0550799	4.21396	8.63455	0.905146	-0.00231954	-0.00185654	-0.00175255	-0.00197621	-0.865114	-0.0107922	-0.131801	1.05516	0.940023	-0.435217	0.4808	0.457365	77	0.0302998	0.00686531
P5143	ETH-4	2021-10-18	-10.5898	0.00849152	0.000890153	-20.1825	0.0163336	0.00171222	6.81614	0.00849152	0.000890153	-3.31027	0.0163336	0.00171222	3.31202	0.115257	0.0121492	-6.02203	0.506882	0.0534301	8.31931	8.09776	0.853579	-0.443339	0.114615	0.0120149	0.591523	0.504059	0.0528397	7.58601	8.05265	0.844147	-0.00231954	-0.00185654	-0.00175255	-0.00197621	-0.865114	-0.0107922	-0.131801	1.05516	0.940023	-0.436794	0.479136	0.476154	109	0.0286356	0.0256541
P5165	ETH-4	2021-10-23	-10.4745	0.00839993	0.000880552	-19.0577	0.0140308	0.00147083	6.96554	0.00839993	0.000880552	-2.17616	0.0140308	0.00147083	4.57704	0.119256	0.0125706	-4.06713	0.445899	0.0470018	9.56864	8.06871	0.850516	-0.454427	0.118591	0.0124317	0.281748	0.443414	0.0464825	6.42336	8.02375	0.841118	-0.00205191	-0.00194239	-0.00185616	-0.00195015	-0.870078	-0.00599238	-0.12997	1.044	0.935694	-0.445501	0.470591	0.466791	114	0.0200908	0.0162913
P5258	ETH-4	2021-11-09	-9.98663	0.0096674	0.00101342	-18.2832	0.0146538	0.00153614	7.4567	0.0096674	0.00101342	-1.39444	0.0146538	0.00153614	5.82896	0.127761	0.0134672	-3.12215	0.406095	0.0428062	-0.992964	5.33539	0.5624	-0.481993	0.127049	0.0133184	-0.336077	0.403833	0.0423332	-6.15335	5.30567	0.556185	-0.00205191	-0.00194239	-0.00185616	-0.00195015	-0.870078	-0.00599238	-0.12997	1.044	0.935694	-0.470625	0.444361	0.422912	131	-0.00613876	-0.0275882
P5273	ETH-4	2021-11-12	-10.0872	0.00869914	0.000911918	-18.5757	0.0132468	0.00138864	7.35076	0.00869914	0.000911918	-1.68946	0.0132468	0.00138864	5.43722	0.119509	0.0125974	-3.32454	0.456951	0.0481669	6.02149	6.36203	0.670616	-0.47256	0.118843	0.0124582	0.0517654	0.454406	0.0476347	1.51837	6.32658	0.663206	-0.00205191	-0.00194239	-0.00185616	-0.00195015	-0.870078	-0.00599238	-0.12997	1.044	0.935694	-0.461957	0.453411	0.431913	134	0.00291122	-0.0185872
P5399	ETH-4	2021-12-18	-9.95391	0.00986918	0.00126362	-18.0136	0.0324609	0.00415619	7.49733	0.00986918	0.00126362	-1.12261	0.0324609	0.00415619	6.19515	0.138286	0.0178526	-2.47948	0.431482	0.0557041	6.44557	8.00179	1.03303	-0.427203	0.137129	0.0175575	-0.23597	0.427872	0.0547833	0.668406	7.93483	1.01595	-0.000996413	-0.00119491	-0.00073394	-0.000975087	-0.853935	3.95166e-05	-0.109808	1.04995	0.922871	-0.421162	0.480674	0.460981	170	0.0301735	0.0104813
P5485	ETH-4	2022-01-05	-10.37	0.00937994	0.000983285	-19.2026	0.0165964	0.00173978	7.05976	0.00937994	0.000983285	-2.32206	0.0165964	0.00173978	4.52458	0.125116	0.0131884	-4.4996	0.455107	0.0479725	13.5794	11.1201	1.17216	-0.459415	0.124419	0.0130427	0.13984	0.452572	0.0474424	10.6112	11.0582	1.15921	-0.00064187	-0.000686345	-0.00052657	-0.000618262	-0.852818	0.000561792	-0.110696	1.05145	0.923091	-0.456617	0.442981	0.433072	188	-0.0075195	-0.0174279
P5511	ETH-4	2022-01-10	-10.2031	0.00733551	0.00076897	-18.9788	0.0153242	0.00160641	7.22631	0.00733551	0.00076897	-2.09614	0.0153242	0.00160641	4.92891	0.121327	0.012789	-4.00265	0.551586	0.0581423	17.1325	13.6754	1.44151	-0.450201	0.120651	0.0126477	0.186076	0.548513	0.0574998	13.5241	13.5992	1.42559	-0.00064187	-0.000686345	-0.00052657	-0.000618262	-0.852818	0.000561792	-0.110696	1.05145	0.923091	-0.447153	0.452931	0.451282	193	0.00243137	0.000782009
P5630	ETH-4	2022-02-14	-10.0912	0.00951964	0.00099793	-18.7928	0.0149593	0.00156816	7.33933	0.00951964	0.00099793	-1.90831	0.0149593	0.00156816	5.23356	0.130733	0.0137805	-2.89334	0.804477	0.0847993	56.9653	34.3035	3.6159	-0.447892	0.130005	0.0136282	0.923224	0.799995	0.0838622	52.7003	34.1124	3.57595	-0.00036694	-0.000686345	-0.000545255	-0.000532847	-0.857315	0.000561792	-0.111394	1.04599	0.923151	-0.445104	0.457575	0.421016	228	0.00707532	-0.0294837
PL5645	ETH-4	2022-02-17	-10.2684	0.0100374	0.0010522	-19.1094	0.0189417	0.00198563	7.15964	0.0100374	0.0010522	-2.2279	0.0189417	0.00198563	4.74828	0.168901	0.0178038	-3.96295	0.62571	0.0659556	29.1401	21.6337	2.28039	-0.431872	0.16796	0.017607	0.490132	0.622224	0.0652268	25.8277	21.5132	2.25519	-0.00036694	-0.000466169	-0.000468268	-0.000433792	-0.852699	0.00384712	-0.114379	1.05088	0.923006	-0.429812	0.471324	0.430416	231	0.0208241	-0.0200842
PL5650	ETH-4	2022-02-18	-10.086	0.00850184	0.000891235	-18.812	0.0131314	0.00137655	7.34358	0.00850184	0.000891235	-1.92767	0.0131314	0.00137655	5.20208	0.106316	0.0112067	-3.63755	0.6001	0.0632561	21.1623	18.621	1.96282	-0.464482	0.105724	0.0110828	0.214975	0.596757	0.0625571	17.076	18.5173	1.94114	-0.00036694	-0.000466169	-0.000545255	-0.000459455	-0.857315	0.00384712	-0.111394	1.04345	0.921186	-0.462092	0.439018	0.425882	232	-0.0114821	-0.0246177
PL5665	ETH-4	2022-02-22	-10.2568	0.00916225	0.000960464	-18.909	0.0135716	0.00142269	7.17773	0.00916225	0.000960464	-2.02588	0.0135716	0.00142269	4.97385	0.129131	0.0136116	-3.14148	0.783356	0.082573	49.8802	29.3639	3.09523	-0.424955	0.128412	0.0134612	0.909921	0.778992	0.0816606	46.0647	29.2004	3.06103	-0.00036694	-0.000466169	-0.000545255	-0.000459455	-0.857315	0.00384712	-0.111394	1.04345	0.921186	-0.42267	0.480153	0.466594	236	0.0296526	0.0160944
PL5694_20V	ETH-4	2022-02-28	-10.1014	0.0166528	0.00174569	-18.9153	0.0285033	0.00298795	7.32524	0.0166528	0.00174569	-2.03191	0.0285033	0.00298795	5.09601	0.107275	0.0113078	-3.49567	0.49442	0.0521165	33.463	21.5999	2.27683	-0.448546	0.106678	0.0111829	0.566396	0.491666	0.0515406	29.5587	21.4795	2.25167	-0.00036694	-0.000466169	-0.000545255	-0.000459455	-0.857315	0.00384712	-0.111394	1.04345	0.921186	-0.446204	0.455596	0.441547	242	0.00509619	-0.00895315
PL5716	ETH-4	2022-03-05	-10.1082	0.00994871	0.00104291	-18.8706	0.0152508	0.00159872	7.32043	0.00994871	0.00104291	-1.9868	0.0152508	0.00159872	5.12207	0.109775	0.0115713	-3.73707	0.536697	0.0565728	25.2274	18.9405	1.9965	-0.462124	0.109164	0.0114435	0.233574	0.533707	0.0559477	21.2687	18.8349	1.97444	-0.00036694	-0.000466169	-0.000545255	-0.000459455	-0.857315	0.00384712	-0.111394	1.04345	0.921186	-0.459771	0.44144	0.427436	247	-0.00906017	-0.0230644
PL5788_20V	ETH-4	2022-03-20	-9.99232	0.00819402	0.000939919	-18.5504	0.0139981	0.00160569	7.44187	0.00819402	0.000939919	-1.66381	0.0139981	0.00160569	5.5818	0.0772871	0.00892435	-1.80261	0.918393	0.106047	247.559	91.8338	10.6041	-0.447348	0.0767701	0.00880614	1.52739	0.91225	0.104642	241.792	91.2195	10.4636	4.90911e-05	0.000251592	-2.89789e-05	9.05682e-05	-0.854438	0.00731103	-0.116563	1.04694	0.921901	-0.447853	0.453025	0.436404	262	0.0025249	-0.0140958
PL5838	ETH-4	2022-04-01	-9.98482	0.013351	0.00121372	-18.4156	0.0190367	0.00173061	7.45375	0.013351	0.00121372	-1.52789	0.0190367	0.00173061	5.75723	0.0888572	0.00811152	-1.28104	1.13444	0.103559	247.297	117.949	10.7672	-0.418923	0.0884862	0.0080442	1.7779	1.1297	0.1027	241.184	117.456	10.6778	4.90911e-05	0.000251592	-2.89789e-05	9.05682e-05	-0.854438	0.00731103	-0.116563	1.04694	0.921901	-0.419445	0.482767	0.466719	274	0.032267	0.0162187
PL5818_20V	ETH-4	2022-03-27	-10.0675	0.00735892	0.000771424	-18.8422	0.0111606	0.00116994	7.3601	0.00735892	0.000771424	-1.95816	0.0111606	0.00116994	5.19971	0.0816204	0.00860355	-3.31539	0.601814	0.0634368	110.998	67.8163	7.14846	-0.453732	0.0811657	0.00850848	0.599499	0.598461	0.0627358	106.599	67.4384	7.06947	4.90911e-05	0.000251592	-2.89789e-05	9.05682e-05	-0.854438	0.00731103	-0.116563	1.04694	0.921901	-0.454203	0.446377	0.42492	269	-0.00412272	-0.0255796
PL5868	ETH-4	2022-04-08	-10.0334	0.00956521	0.00100271	-18.675	0.0141302	0.00148125	7.39842	0.00956521	0.00100271	-1.78949	0.0141302	0.00148125	5.40231	0.12999	0.0137021	-2.51876	0.87979	0.092738	171.122	96.6487	10.1877	-0.457584	0.129266	0.0135507	1.06086	0.874888	0.0917132	166.051	96.1103	10.0751	4.90911e-05	0.000251592	-2.89789e-05	9.05682e-05	-0.854438	0.00731103	-0.116563	1.04694	0.921901	-0.458073	0.442326	0.425935	281	-0.0081744	-0.0245655
PL5926	ETH-4	2022-04-22	-10.1091	0.015799	0.00143628	-18.4363	0.0295611	0.00268737	7.33486	0.015799	0.00143628	-1.549	0.0295611	0.00268737	5.57724	0.116744	0.0106572	-2.00725	0.811375	0.0740681	598.936	2501.97	228.397	-0.455341	0.116256	0.0105688	1.09179	0.807987	0.0734534	591.365	2491.52	226.502	-0.000194183	0.000806872	-6.39664e-06	0.000202097	-0.857932	0.0126176	-0.118609	1.03919	0.919492	-0.456468	0.445135	0.441413	295	-0.00536459	-0.00908651
PL5958_20V	ETH-4	2022-04-30	-10.1863	0.0290448	0.00236363	-18.9684	0.0518838	0.00422224	7.24266	0.0290448	0.00236363	-2.08557	0.0518838	0.00422224	4.97553	0.109092	0.00890733	-3.33145	0.683155	0.0557794	126.32	61.2316	4.99954	-0.430987	0.108728	0.00884814	0.838913	0.680874	0.0554088	122.282	61.0272	4.96632	-0.000194183	0.000806872	-6.39664e-06	0.000202097	-0.857932	0.0126176	-0.118609	1.03919	0.919492	-0.431993	0.47057	0.463752	303	0.0200697	0.0132515
PL5982_20V	ETH-4	2022-05-05	-10.128	0.052267	0.00347675	-18.8215	0.0931911	0.00619898	7.30331	0.052267	0.00347675	-1.9374	0.0931911	0.00619898	5.17847	0.164558	0.0109706	-1.92694	1.33542	0.0890281	237.219	146.272	9.75144	-0.43715	0.164192	0.0109219	1.95173	1.33245	0.0886333	232.344	145.946	9.7082	-0.000194183	0.000806872	-6.39664e-06	0.000202097	-0.857932	0.0126176	-0.118609	1.03919	0.919492	-0.438197	0.464122	0.451691	308	0.0136223	0.00119147
PL6006	ETH-4	2022-05-12	-10.1047	0.0170276	0.0014601	-18.6487	0.024864	0.00213207	7.33157	0.0170276	0.0014601	-1.76317	0.024864	0.00213207	5.35409	0.123417	0.0106221	-1.97332	0.981679	0.0844895	253.536	103.864	8.9392	-0.463	0.122959	0.0105437	1.55546	0.978036	0.0838659	248.131	103.479	8.87322	-0.000194183	0.000806872	-6.39664e-06	0.000202097	-0.857932	0.0126176	-0.118609	1.03919	0.919492	-0.464082	0.437223	0.419959	315	-0.0132768	-0.0305411
PL6011	ETH-4	2022-05-13	-10.1057	0.0140737	0.00136696	-18.3062	0.0240609	0.00233701	7.34268	0.0140737	0.00136696	-1.41789	0.0240609	0.00233701	5.7492	0.122402	0.0119452	-1.95369	0.70184	0.0684925	180.804	78.4974	7.66056	-0.42147	0.121817	0.0118319	0.882648	0.69849	0.0678433	174.9	78.1227	7.58795	-0.000194183	0.000806872	-6.39664e-06	0.000202097	-0.857932	0.0126176	-0.118609	1.03919	0.919492	-0.422632	0.480297	0.4617	316	0.0297972	0.0112
PL6038_20V	ETH-4	2022-05-18	-10.1143	0.0259742	0.00172778	-18.8855	0.0457254	0.00304161	7.3141	0.0259742	0.00172778	-2.00183	0.0457254	0.00304161	5.12063	0.100963	0.00673084	-2.34382	1.21375	0.0809169	295.275	103.194	6.87957	-0.442272	0.100738	0.006701	1.66254	1.21105	0.080558	290.321	102.964	6.84906	-0.000194183	0.000806872	-6.39664e-06	0.000202097	-0.857932	0.0126176	-0.118609	1.03919	0.919492	-0.443307	0.458812	0.440186	321	0.00831164	-0.0103135
PL6062	ETH-4	2022-05-23	-10.0744	0.0608982	0.00405089	-18.7288	0.0288571	0.00191954	7.35757	0.0608982	0.00405089	-1.84385	0.0288571	0.00191954	5.33096	0.129662	0.00864415	-2.20323	0.95331	0.063554	163.189	87.1051	5.807	-0.433185	0.129374	0.00860581	1.48661	0.951189	0.0632722	158.326	86.9113	5.78125	-0.000194183	0.000806872	-6.39664e-06	0.000202097	-0.857932	0.0126176	-0.118609	1.03919	0.919492	-0.434263	0.468211	0.449346	326	0.0177107	-0.00115421
PL6122	ETH-4	2022-06-04	-10.1449	0.0188336	0.00161496	-18.5426	0.0315043	0.00270148	7.29702	0.0188336	0.00161496	-1.65631	0.0315043	0.00270148	5.41564	0.12253	0.0105457	-3.3912	0.449647	0.0386995	30.3836	54.2541	4.66945	-0.47162	0.122076	0.0104679	-0.0815177	0.447979	0.0384139	25.7629	54.0528	4.63499	-0.000388754	-0.000230359	9.47915e-05	-0.000174774	-0.860283	-0.00273424	-0.109944	1.04396	0.92417	-0.470673	0.432806	0.425568	338	-0.0176943	-0.0249317
PL6150	ETH-4	2022-06-10	-10.179	0.017668	0.0014378	-18.9451	0.033436	0.00272099	7.25042	0.017668	0.0014378	-2.06208	0.033436	0.00272099	4.98971	0.131505	0.0107373	-4.19894	0.439133	0.0358551	24.4611	66.4323	5.42418	-0.447957	0.131066	0.010666	-0.0792822	0.437667	0.0356168	20.7322	66.2105	5.38813	-0.000388754	-0.000230359	9.47915e-05	-0.000174774	-0.860283	-0.00273424	-0.109944	1.04396	0.92417	-0.447085	0.457431	0.449908	344	0.00693066	-0.000592278
PL6170	ETH-4	2022-06-14	-10.1522	0.0122734	0.0011921	-18.9652	0.0231749	0.00225095	7.27517	0.0122734	0.0011921	-2.08228	0.0231749	0.00225095	4.98889	0.139443	0.0136082	-4.13111	0.485383	0.0473685	16.7923	62.034	6.0539	-0.454225	0.138777	0.0134792	0.0293013	0.483066	0.0469195	13.1052	61.7379	5.99652	-0.000388754	-0.000230359	9.47915e-05	-0.000174774	-0.860283	-0.00273424	-0.109944	1.04396	0.92417	-0.453353	0.450887	0.43785	348	0.000387325	-0.0126498
PL6187	ETH-4	2022-06-19	-10.1222	0.0158205	0.00153662	-18.9389	0.0258301	0.00250884	7.30464	0.0158205	0.00153662	-2.05571	0.0258301	0.00250884	5.05494	0.11504	0.0112268	-4.13611	0.457173	0.0446156	-261.443	5528.26	539.503	-0.444863	0.114491	0.0111203	-0.0289612	0.454991	0.0441927	-264.183	5501.87	534.389	-0.000388754	-0.000230359	9.47915e-05	-0.000174774	-0.860283	-0.00273424	-0.109944	1.04396	0.92417	-0.44398	0.460672	0.447831	353	0.0101725	-0.00266947
PL6203	ETH-4	2022-06-23	-10.1545	0.0203996	0.00213846	-19.0622	0.0392658	0.00411617	7.26963	0.0203996	0.00213846	-2.18009	0.0392658	0.00411617	4.85773	0.127959	0.0134881	-4.34338	0.443656	0.0467654	82.7938	201.214	21.2098	-0.482681	0.127246	0.0133391	0.01217	0.441184	0.0462487	79.0814	200.093	20.9755	-0.000388754	-0.000230359	9.47915e-05	-0.000174774	-0.860283	-0.00273424	-0.109944	1.04396	0.92417	-0.481832	0.421156	0.414595	357	-0.0293436	-0.035905
PL6235	ETH-4	2022-06-30	-10.0954	0.0203856	0.00213699	-18.872	0.0313271	0.00328397	7.3325	0.0203856	0.00213699	-1.98819	0.0313271	0.00328397	5.13007	0.141852	0.0149525	-3.56564	0.470062	0.0495489	19.8473	17.9664	1.89383	-0.465156	0.141062	0.0147873	0.408473	0.467443	0.0490014	15.8991	17.8663	1.8729	-0.000388754	-0.000230359	9.47915e-05	-0.000174774	-0.860283	-0.00273424	-0.109944	1.04396	0.92417	-0.464259	0.439502	0.441952	364	-0.0109982	-0.00854793
PL6259	ETH-4	2022-07-06	-10.0904	0.0274347	0.0026647	-18.843	0.0447177	0.00434336	7.33824	0.0274347	0.0026647	-1.95895	0.0447177	0.00434336	5.18124	0.135978	0.0132701	-3.73998	0.53081	0.0518017	10.301	16.3889	1.59939	-0.448942	0.135329	0.0131443	0.174834	0.528276	0.0513107	6.32577	16.3107	1.58423	-0.000388754	-0.000903433	-0.000213651	-0.000501946	-0.860283	-0.00819313	-0.120262	1.05355	0.93282	-0.446341	0.462578	0.446664	370	0.0120783	-0.00383622
PL6292	ETH-4	2022-07-15	-10.1773	0.0905425	0.00736825	-19.0428	0.168139	0.013683	7.24861	0.0905425	0.00736825	-2.16058	0.168139	0.013683	4.90012	0.240527	0.0196389	-3.82373	0.569894	0.0465316	19.0247	19.6864	1.60739	-0.438213	0.239723	0.0195084	0.494965	0.567991	0.0462224	15.5145	19.6207	1.59671	-0.000680888	-0.000903433	-0.000213651	-0.000599324	-0.866217	-0.00819313	-0.120262	1.04586	0.932356	-0.435277	0.477116	0.445611	379	0.0266161	-0.00488883
PL6318	ETH-4	2022-07-22	-10.1286	0.0639243	0.00620888	-18.9344	0.121926	0.0118425	7.29878	0.0639243	0.00620888	-2.05117	0.121926	0.0118425	5.04875	0.187947	0.0183417	-3.53415	0.558153	0.0544702	32.0548	21.3982	2.08825	-0.44949	0.18705	0.0181679	0.566369	0.555489	0.0539539	28.2236	21.296	2.06846	-0.000680888	-0.000903433	-0.000213651	-0.000599324	-0.866217	-0.00819313	-0.120262	1.04586	0.932356	-0.446464	0.465415	0.445507	386	0.0149153	-0.00499305
PL6338	ETH-4	2022-07-28	-10.0158	0.0351013	0.00319103	-18.7984	0.0765304	0.00695731	7.41079	0.0351013	0.00319103	-1.91385	0.0765304	0.00695731	5.27354	0.161017	0.0146988	-3.50758	0.538557	0.0491633	30.1537	18.7326	1.71005	-0.475839	0.160345	0.0145768	0.317737	0.536308	0.0487553	25.9305	18.6544	1.69586	-0.000680888	-0.000903433	-0.000213651	-0.000599324	-0.866217	-0.00819313	-0.120262	1.04586	0.932356	-0.472678	0.437999	0.434929	392	-0.0125009	-0.0155708
PL6364	ETH-4	2022-08-04	-9.98341	0.00937388	0.000645325	-18.5959	0.0202493	0.00139402	7.44873	0.00937388	0.000645325	-1.70967	0.0202493	0.00139402	5.49601	0.117161	0.00808487	-3.19535	0.53897	0.0371924	20.1798	18.5819	1.28227	-0.494499	0.116882	0.00804646	0.221898	0.537685	0.0370158	15.5485	18.5376	1.27618	-0.000680888	-0.000903433	-0.000213651	-0.000599324	-0.866217	-0.00819313	-0.120262	1.04586	0.932356	-0.491205	0.418622	0.42536	399	-0.0318777	-0.0251403
PL6393_20V	ETH-4	2022-08-14	-10.0738	0.0324999	0.00216186	-18.8321	0.0713578	0.00474665	7.35448	0.0324999	0.00216186	-1.94798	0.0713578	0.00474665	5.18502	0.147596	0.00983974	-3.87996	0.374603	0.0249735	15.4129	12.8353	0.855686	-0.472608	0.147268	0.00979611	0.0123142	0.373769	0.0248628	11.3784	12.8067	0.851891	-0.000416868	-0.0011208	-0.000370242	-0.000635971	-0.855429	-0.0110549	-0.11906	1.06156	0.93433	-0.469311	0.436129	0.441586	409	-0.0143713	-0.00891401
PL6415_20V	ETH-4	2022-08-20	-10.0019	0.021463	0.00142769	-18.6948	0.0527062	0.00350596	7.42767	0.021463	0.00142769	-1.8094	0.0527062	0.00350596	5.38379	0.131223	0.00874817	-3.68887	0.384413	0.0256276	3.2811	9.99495	0.66633	-0.486333	0.130931	0.00870938	-0.0735408	0.383558	0.0255139	-1.05519	9.97272	0.663375	-0.000416868	-0.0011208	-0.000370242	-0.000635971	-0.855429	-0.0110549	-0.11906	1.06156	0.93433	-0.482909	0.421693	0.423548	415	-0.028807	-0.0269519
PL6444_20V	ETH-4	2022-08-28	-10.0899	0.00629988	0.000660407	-18.8248	0.0134764	0.00141271	7.33945	0.00629988	0.000660407	-1.94058	0.0134764	0.00141271	5.17098	0.105171	0.011086	-3.64122	0.448433	0.047269	25.303	16.2784	1.71589	-0.478459	0.104585	0.0109635	0.237167	0.445934	0.0467466	21.2305	16.1877	1.69693	-0.000416868	-0.0011208	-0.000370242	-0.000635971	-0.855429	-0.0110549	-0.11906	1.06156	0.93433	-0.47517	0.429908	0.432626	423	-0.0205916	-0.0178741
PL6461_20V	ETH-4	2022-09-01	-9.96587	0.0104297	0.000894343	-18.6589	0.0180091	0.00154427	7.46319	0.0104297	0.000894343	-1.77308	0.0180091	0.00154427	5.48461	0.0920496	0.00792237	-3.33964	0.33718	0.0290198	21.7156	11.6234	1.00039	-0.458224	0.091708	0.0078639	0.204156	0.335928	0.0288056	17.1886	11.5803	0.993003	-0.000416868	-0.0011208	-0.000370242	-0.000635971	-0.855429	-0.0110549	-0.11906	1.06156	0.93433	-0.454736	0.451601	0.451122	427	0.00110077	0.00062243
PL6488_20V	ETH-4	2022-09-08	-10.0479	0.00953197	0.000708506	-18.7241	0.0196909	0.00146362	7.38288	0.00953197	0.000708506	-1.83905	0.0196909	0.00146362	5.31725	0.0942257	0.00702317	-3.15782	0.512414	0.0381931	37.6567	23.6314	1.76138	-0.47745	0.0939636	0.00698426	0.51886	0.510989	0.0379815	33.2811	23.5657	1.75162	-0.000416868	-0.0011208	-0.000370242	-0.000635971	-0.855429	-0.0110549	-0.11906	1.06156	0.93433	-0.474069	0.431078	0.428318	434	-0.0194223	-0.0221822
PL6519_20V	ETH-4	2022-09-16	-10.0589	0.00680384	0.000452585	-18.6991	0.0121466	0.000807983	7.37331	0.00680384	0.000452585	-1.81381	0.0121466	0.000807983	5.35227	0.0956437	0.00637624	-3.34431	0.35677	0.0237847	21.0078	18.3995	1.22664	-0.457686	0.0954309	0.00634797	0.281111	0.355977	0.0236792	16.6622	18.3586	1.2212	-0.000416868	-0.0011208	-0.000370242	-0.000635971	-0.855429	-0.0110549	-0.11906	1.06156	0.93433	-0.454282	0.452082	0.452585	442	0.00158239	0.00208507
PL6550_20V	ETH-4	2022-09-25	-10.1586	0.0111285	0.000905624	-18.6628	0.0155519	0.0012656	7.27983	0.0111285	0.000905624	-1.77748	0.0155519	0.0012656	5.29862	0.080316	0.00655777	-2.93466	0.523936	0.0427792	38.6371	21.8278	1.78223	-0.451086	0.0800478	0.0065142	0.619411	0.522187	0.042495	34.2448	21.7549	1.77039	-5.53332e-05	-0.000386066	-9.52512e-05	-0.000178883	-0.847577	0.00566373	-0.11906	1.05839	0.924622	-0.450138	0.448199	0.462831	451	-0.00230141	0.0123313
PL6563	ETH-4	2022-09-30	-10.0955	0.0101195	0.00086774	-18.7215	0.0249311	0.00213783	7.33771	0.0101195	0.00086774	-1.83648	0.0249311	0.00213783	5.26259	0.129577	0.0111522	-3.63925	0.42988	0.0369982	9.63718	11.6265	1.00065	-0.488084	0.129096	0.0110699	0.0305205	0.428285	0.0367252	5.4227	11.5834	0.993266	-5.53332e-05	-0.000386066	-9.52512e-05	-0.000178883	-0.847577	0.00566373	-0.11906	1.05839	0.924622	-0.487143	0.409033	0.422682	456	-0.0414669	-0.0278183
PL6591_20V	ETH-4	2022-10-09	-10.2267	0.0140413	0.000934014	-18.8622	0.0197642	0.00131469	7.20805	0.0140413	0.000934014	-1.97857	0.0197642	0.00131469	5.03888	0.0880774	0.00587182	-3.18331	0.604393	0.0402929	52.4532	26.7545	1.78363	-0.4379	0.0878814	0.00584578	0.773036	0.603048	0.0401142	48.4971	26.695	1.77572	-5.53332e-05	-0.000386066	-9.52512e-05	-0.000178883	-0.847577	0.00566373	-0.11906	1.05839	0.924622	-0.436999	0.462105	0.467132	465	0.0116051	0.0166321
PL6599_20V	ETH-4	2022-10-11	-10.1967	0.0173645	0.0014131	-18.6962	0.0290519	0.00236421	7.24237	0.0173645	0.0014131	-1.81122	0.0290519	0.00236421	5.23893	0.0962178	0.00785615	-3.16505	0.497415	0.0406138	30.7632	20.222	1.65112	-0.438878	0.0958965	0.00780395	0.455819	0.495754	0.0403439	26.513	20.1545	1.64015	-5.53332e-05	-0.000386066	-9.52512e-05	-0.000178883	-0.847577	0.00566373	-0.11906	1.05839	0.924622	-0.437941	0.461108	0.462175	467	0.0106078	0.011675
PL6639	ETH-4	2021-10-22	-10.0868	0.00770182	0.00080737	-18.6189	0.013366	0.00140114	7.34964	0.00770182	0.00080737	-1.73304	0.013366	0.00140114	5.39309	0.125183	0.0131954	-3.52903	0.471026	0.0496505	2.62645	5.86218	0.617928	-0.472381	0.124485	0.0130496	-0.0661196	0.468402	0.0491019	-1.77467	5.82952	0.6111	-0.00240034	-0.00161619	-0.00158414	-0.00186689	-0.861903	-0.0212352	-0.129189	1.06647	0.945464	-0.462312	0.452423	0.452021	113	0.00192268	0.00152087
PL6926	ETH-4	02/17/23	-10.0711	0.00643275	0.000523489	-18.8109	0.0104858	0.000853323	7.35776	0.00643275	0.000523489	-1.92661	0.0104858	0.000853323	5.23764	0.0768256	0.00627278	-3.44276	0.371007	0.0302926	10.3086	8.18425	0.668242	-0.444688	0.0765691	0.0062311	0.408391	0.369768	0.0300913	6.24845	8.15693	0.663801	-0.00108742	-0.000832954	-0.000833831	-0.000918069	-0.879402	-0.00445975	-0.120924	1.02671	0.929467	-0.439879	0.477839	0.457472	597	0.0273385	0.00697164
PL6951	ETH-4	02/27/23	-10.0661	0.00728426	0.000835562	-18.4744	0.0127422	0.00146163	7.37442	0.00728426	0.000835562	-1.58737	0.0127422	0.00146163	5.56121	0.118664	0.0137021	-3.25653	0.427254	0.0493351	3.55108	6.6024	0.762379	-0.474003	0.11787	0.0135206	-0.0845167	0.424396	0.0486816	-1.16671	6.55824	0.752281	-0.000967742	-0.000865992	-0.000857669	-0.000897134	-0.872452	-0.00458791	-0.124708	1.03734	0.931977	-0.469014	0.44545	0.427919	607	-0.00505002	-0.0225808
PL6963	ETH-4	03/03/23	-10.1201	0.00582414	0.000529468	-18.7184	0.00989865	0.000899877	7.31444	0.00582414	0.000529468	-1.83347	0.00989865	0.000899877	5.25988	0.0917101	0.00837195	-3.71267	0.346036	0.0315886	-0.0207967	6.31044	0.576062	-0.469918	0.0913272	0.00830247	-0.0492032	0.344591	0.0313264	-4.17635	6.28409	0.571281	-0.000945624	-0.000848688	-0.000857656	-0.000883989	-0.8501	-0.00519177	-0.140488	1.07451	0.94225	-0.465268	0.442316	0.431719	611	-0.00818431	-0.0187815
PL6982	ETH-4	03/14/23	-10.0495	0.00581239	0.000473005	-18.5695	0.00908626	0.000739429	7.38679	0.00581239	0.000473005	-1.68316	0.00908626	0.000739429	5.50198	0.0957035	0.00781416	-3.09716	0.429228	0.0350463	10.4798	10.4313	0.851709	-0.451257	0.0953839	0.00776223	0.267307	0.427795	0.0348135	5.90592	10.3964	0.84605	-0.000884797	-0.000801103	-0.000857621	-0.000847841	-0.857097	-0.00685241	-0.140488	1.0666	0.942703	-0.446592	0.466368	0.450662	622	0.0158679	0.000162081
PL6985	ETH-4	03/15/23	-10.0365	0.00654642	0.00053274	-18.6361	0.011533	0.000938541	7.39682	0.00654642	0.00053274	-1.75025	0.011533	0.000938541	5.46732	0.0913079	0.00745526	-2.64108	0.807153	0.0659038	33.4517	22.3785	1.8272	-0.429937	0.0910031	0.00740573	0.859429	0.804458	0.0654659	28.8988	22.3038	1.81506	-0.000879268	-0.000796777	-0.000857618	-0.000844554	-0.857733	-0.00700338	-0.140488	1.06588	0.942743	-0.425319	0.489402	0.47224	623	0.0389019	0.0217401
PL7044	ETH-4	04/15/23	-10.0491	0.00691947	0.000885947	-18.6602	0.0112085	0.0014351	7.38396	0.00691947	0.000885947	-1.77457	0.0112085	0.0014351	5.38398	0.0876256	0.0113124	-3.606	0.341609	0.0441015	-1.46414	4.52197	0.583784	-0.475682	0.0868923	0.0111254	-0.06015	0.33875	0.0433725	-5.80212	4.48413	0.574134	-0.000854883	-0.000840036	-0.000857567	-0.000850829	-0.85328	-0.00549371	-0.140488	1.07051	0.942164	-0.471101	0.437848	0.425802	654	-0.0126525	-0.0246982
PL7075	ETH-4	04/28/23	-10.0477	0.00761638	0.000798414	-18.5079	0.0119644	0.00125421	7.39071	0.00761638	0.000798414	-1.6211	0.0119644	0.00125421	5.5616	0.0801714	0.00845081	-2.69641	0.592282	0.062432	14.2757	13.0511	1.37571	-0.457084	0.0797247	0.00835742	0.544997	0.588983	0.0617421	9.55716	12.9784	1.3605	-0.000910427	-0.000783799	-0.000857567	-0.000850598	-0.861549	-0.00745628	-0.140488	1.06123	0.942694	-0.452353	0.462643	0.444818	667	0.0121426	-0.0056816
PL7101	ETH-4	05/04/23	-9.90978	0.00892995	0.000867353	-18.3965	0.0127311	0.00123656	7.52577	0.00892995	0.000867353	-1.5085	0.0127311	0.00123656	5.8168	0.0867882	0.00846966	-2.50489	0.5012	0.0489121	19.9499	12.5483	1.22459	-0.45253	0.0863739	0.00838938	0.511447	0.498808	0.0484485	14.8349	12.4884	1.21298	-0.000824974	-0.000870318	-0.000857567	-0.000850953	-0.848828	-0.00443694	-0.140488	1.07556	0.941872	-0.44758	0.460474	0.44966	673	0.00997358	-0.000839914

## Sheet: Table S9 ETH D48
SAMPLE NAME	DATE	Relative time	resudual Δ48 (CDES)	δ45	δ45 sd	δ46	δ46 sd	δ47	δ47 sd	Δ47	δ48	δ48 sd	Δ48	δ49	δ49 sd	Δ49	Δ48 (CDES) (‰)
ETH-1	2021-07-30 11:13:00	0.467361	-0.034946	18.833	0.003	13.355	0.002	32.169	0.055	-0.64	27.085	0.036	0.191	32.215	3.021	-14.168	0.100407
ETH-1	2021-08-30 10:56:00	31.4556	0.0229957	19.254	0.002	14.319	0.004	33.534	0.028	-0.679	29.121	0.181	0.27	36.738	3.704	-12.13	0.158349
ETH-1	2021-08-06 12:10:00	7.50694	-0.000775455	19.369	0.003	14.981	0.006	34.312	0.028	-0.685	30.465	0.169	0.27	34.848	5.007	-15.314	0.134578
ETH-1	2021-09-20 11:02:00	52.4597	0.0236707	19.286	0.004	14.594	0.004	33.822	0.018	-0.698	29.688	0.101	0.279	31.827	5.262	-17.365	0.159024
ETH-1	2021-09-13 18:18:00	45.7625	-0.0388738	19.285	0.002	14.542	0.004	33.757	0.029	-0.71	29.526	0.091	0.224	26.096	3.488	-22.724	0.0964795
ETH-1	2021-10-15 11:12:00	77.4667	-0.0423603	18.906	0.003	13.399	0.008	32.283	0.038	-0.645	27.168	0.04	0.186	84.877	13.146	35.961	0.092993
ETH-1	2021-12-28 17:03:00	151.71	-0.0269329	19.391	0.003	15.096	0.003	34.509	0.03	-0.626	30.476	0.035	0.055	52.492	6.907	1.232	0.10842
ETH-1	2022-01-01 11:16:00	155.469	0.0368418	19.276	0.003	14.789	0.003	34.06	0.025	-0.648	29.915	0.107	0.114	53.23	8.495	2.649	0.172195
ETH-1	2022-01-12 11:15:00	166.469	0.0186466	19.425	0.004	14.867	0.004	34.253	0.032	-0.687	30.055	0.107	0.097	58.854	7.435	7.693	0.154
ETH-1	2022-01-25 11:54:00	179.496	-0.00856387	19.438	0.019	14.832	0.029	34.259	0.03	-0.66	29.955	0.102	0.069	59.308	6.6	8.18	0.126789
ETH-1	2022-02-09 11:32:00	194.481	0.00703726	19.435	0.002	14.806	0.005	34.271	0.017	-0.621	30.052	0.058	0.213	69.471	11.272	17.906	0.142391
ETH-1	2022-02-15 12:11:00	200.508	-0.00125459	19.383	0.005	14.608	0.011	34.011	0.028	-0.628	29.636	0.076	0.201	80.576	10.42	28.927	0.134099
ETH-1	2022-02-24 11:45:00	209.49	0.0489163	19.263	0.004	14.407	0.005	33.66	0.04	-0.651	29.266	0.118	0.239	64.985	12.095	14.604	0.18427
ETH-1	2022-03-08 07:59:00	221.333	0.0385133	19.526	0.002	15.052	0.006	34.585	0.026	-0.648	30.584	0.108	0.246	75.277	10.855	22.849	0.173867
ETH-1	2022-03-16 11:40:00	229.486	0.0260275	19.254	0.002	14.431	0.004	33.742	0.033	-0.585	29.296	0.061	0.22	55.532	10.343	5.561	0.161381
ETH-1	2022-03-21 13:44:00	234.572	0.0585479	19.39	0.008	14.802	0.016	34.186	0.028	-0.653	30.088	0.12	0.257	79.483	9.445	27.493	0.193901
ETH-1	2022-03-29 11:44:00	242.489	0.0541165	19.361	0.007	14.683	0.016	34.076	0.019	-0.615	29.875	0.136	0.285	62.99	10.179	12.057	0.18947
ETH1	2022-04-11 07:11:00	255.299	-0.0444599	19.375	0.015	14.906	0.031	34.273	0.031	-0.654	30.253	0.084	0.213	64.51	6.081	13.053	0.0908934
ETH-1	2022-04-24 01:25:00	268.059	-0.023892	19.448	0.028	14.887	0.052	34.314	0.066	-0.67	30.215	0.116	0.214	58.124	4.125	6.937	0.111461
ETH-1	2022-04-27 22:06:00	271.921	0.0290251	19.518	0.007	15.045	0.013	34.567	0.025	-0.65	30.587	0.087	0.262	48.41	6.118	-2.687	0.164378
ETH-1	2022-05-03 07:46:00	277.324	-0.0271731	19.406	0.026	14.876	0.049	34.291	0.076	-0.639	30.19	0.128	0.211	63.493	6.779	12.111	0.10818
ETH-1	2022-05-10 09:34:00	284.399	0.0268919	19.356	0.009	14.878	0.018	34.219	0.028	-0.661	30.241	0.094	0.256	52.388	9.78	1.59	0.162245
ETH-1	2022-05-15 00:46:00	289.032	-0.0489185	19.462	0.021	14.918	0.041	34.36	0.061	-0.671	30.259	0.116	0.194	49.569	4.665	-1.28	0.0864349
ETH-1	2022-05-18 12:26:00	292.518	-0.0088236	19.454	0.03	14.765	0.06	34.22	0.089	-0.649	29.918	0.151	0.166	55.696	5.634	4.858	0.12653
ETH-1	2022-05-25 07:27:00	299.31	-0.0313672	19.576	0.023	15.523	0.048	35.088	0.069	-0.667	31.452	0.139	0.161	54.282	6.234	1.911	0.103986
ETH-1	2022-05-31 11:52:00	305.494	-0.0430522	19.391	0.024	14.78	0.039	34.129	0.035	-0.688	29.915	0.091	0.133	46.016	5.289	-4.321	0.0923011
ETH-1	2022-06-07 00:04:00	312.003	0.022552	19.498	0.017	14.918	0.03	34.373	0.045	-0.695	30.265	0.116	0.2	58.491	6.301	7.171	0.157905
ETH-1	2022-06-17 13:09:00	322.548	-0.00830408	19.498	0.007	14.966	0.008	34.439	0.054	-0.677	30.331	0.156	0.171	72.902	10.453	20.79	0.127049
ETH-1	2022-06-18 12:36:00	323.525	-0.000334932	19.525	0.01	14.931	0.005	34.409	0.013	-0.699	30.269	0.148	0.178	56.635	5.488	5.352	0.135018
ETH-1	2022-06-25 11:32:00	330.481	-0.00151054	19.434	0.017	14.759	0.021	34.209	0.021	-0.633	29.914	0.107	0.173	55.011	5.66	4.237	0.133843
ETH-1	2022-07-08 13:50:00	343.576	0.0171749	19.555	0.061	15.018	0.11	34.479	0.134	-0.747	30.465	0.119	0.197	61.559	8.901	9.836	0.152528
ETH-1	2022-07-11 11:51:00	346.494	0.0470378	19.414	0.085	14.693	0.15	34.087	0.21	-0.667	29.771	0.331	0.165	53.879	6.907	3.308	0.182391
ETH-1	2022-07-18 11:37:00	353.484	0.0027302	19.495	0.051	14.87	0.101	34.287	0.135	-0.728	30.094	0.207	0.129	39.819	3.173	-10.501	0.138084
ETH-1	2022-07-26 12:38:00	361.526	0.0247514	19.451	0.074	14.788	0.162	34.133	0.261	-0.752	29.946	0.26	0.147	52.052	4.191	1.346	0.160105
ETH-1	2022-07-27 14:42:00	362.613	0.00926749	19.469	0.062	14.997	0.141	34.34	0.217	-0.773	30.359	0.379	0.137	45.947	6.634	-4.885	0.144621
ETH-1	2022-08-01 14:53:00	367.62	-0.0108324	19.51	0.013	14.966	0.042	34.377	0.083	-0.749	30.174	0.062	0.017	46.042	5.936	-4.778	0.124521
ETH-1	2022-08-10 13:17:00	376.553	-0.0291313	19.496	0.065	15.044	0.127	34.526	0.172	-0.666	30.312	0.247	-0.002	60.294	6.639	8.643	0.106222
ETH-1	2022-08-15 12:41:00	381.528	-0.0168627	19.596	0.021	15.163	0.048	34.694	0.068	-0.72	30.568	0.13	0.013	57.4	6.179	5.555	0.118491
ETH-1	2022-08-24 11:53:00	390.495	-0.0296035	19.558	0.016	15.008	0.041	34.502	0.067	-0.717	30.237	0.145	-0.003	52.17	2.128	0.921	0.10575
ETH-1	2022-08-29 20:45:00	395.865	-0.0320398	19.557	0.003	15.058	0.001	34.56	0.018	-0.709	30.337	0.035	-0.005	48.556	0.97	-2.613	0.103314
ETH-1	2022-09-05 11:16:00	402.469	0.0233246	19.569	0.005	15.013	0.007	34.579	0.02	-0.659	30.307	0.059	0.055	48.537	4.533	-2.556	0.158678
ETH-1	2022-09-12 12:13:00	409.509	-0.0294125	19.558	0.004	14.992	0.006	34.508	0.027	-0.696	30.205	0.069	-0.003	55.08	6.282	3.72	0.105941
ETH-1	2022-09-18 13:18:00	415.554	-0.0482432	19.542	0.005	15.083	0.005	34.57	0.029	-0.708	30.347	0.082	-0.045	50.495	5.397	-0.801	0.0871102
ETH-1	2022-09-26 20:10:00	423.84	-0.0329546	19.323	0.01	15.045	0.016	34.31	0.011	-0.701	30.284	0.118	-0.031	43.659	0.685	-7.003	0.102399
ETH-1	2022-10-05 13:24:00	432.558	0.0300954	19.438	0.013	14.926	0.03	34.33	0.074	-0.683	30.102	0.118	0.027	46.772	3.823	-3.931	0.165449
ETH-1	2022-10-10 19:13:00	437.801	-0.05304	19.296	0.025	14.718	0.058	33.946	0.089	-0.709	29.598	0.123	-0.052	35.483	5.788	-14.13	0.0823133
ETH-1	2022-10-17 11:10:00	444.465	-0.00674935	19.517	0.017	14.98	0.03	34.472	0.04	-0.678	30.177	0.113	-0.007	52.105	5.293	0.956	0.128604
ETH-1	2022-10-24 16:57:00	451.706	-0.0548963	19.329	0.023	14.823	0.044	34.051	0.062	-0.742	29.812	0.051	-0.053	29.959	2.683	-19.623	0.080457
ETH-1	2022-10-30 13:50:00	457.576	-0.0340856	19.524	0.032	15.198	0.077	34.732	0.146	-0.644	30.594	0.276	-0.031	51.282	3.987	-0.256	0.101268
ETH-1	2022-11-03 18:21:00	461.765	-0.0110866	19.525	0.013	15.002	0.037	34.504	0.083	-0.676	30.263	0.194	0.033	58.607	3.88	7.091	0.124267
ETH-1	02/18/23	598	-0.0218031	19.325	0.003	14.715	0.005	33.934	0.023	-0.746	29.599	0.06	-0.046	27.636	5.308	-21.625	0.11355
ETH-1	02/28/23	608	-0.00804081	19.596	0.003	15.156	0.005	34.654	0.026	-0.752	30.512	0.116	-0.029	29.911	3.131	-20.574	0.127312
ETH-1	03/15/23	623	-0.0735377	19.464	0.002	15.059	0.004	34.419	0.027	-0.752	30.386	0.168	0.04	31.814	2.162	-18.445	0.0618156
ETH-1	03/20/23	628	-0.00299428	19.598	0.002	15.206	0.005	34.758	0.03	-0.703	30.752	0.13	0.105	49.512	4.105	-2.033	0.132359
ETH-1	04/10/23	649	-0.0696602	19.519	0.002	15.157	0.004	34.693	0.065	-0.638	30.651	0.071	0.104	22.582	2.057	-27.467	0.0656931
ETH-1	04/17/23	656	-0.0658667	19.533	0.003	15.135	0.005	34.668	0.015	-0.655	30.61	0.077	0.107	23.191	0.663	-26.862	0.0694866
ETH-1	04/25/23	664	-0.0191303	19.569	0.003	15.084	0.005	34.663	0.006	-0.647	30.549	0.09	0.148	23.36	3.283	-26.642	0.116223
ETH-1	05/06/23	675	-0.0391906	19.534	0.002	15.085	0.002	34.595	0.045	-0.678	30.531	0.117	0.13	15.119	1.991	-34.446	0.0961627
ETH-2	2021-08-24 11:47:00	25.491	0.0355127	7.538	0.002	-1.41	0.004	5.7	0.025	-0.683	-3.016	0.206	-0.198	6.273	3.381	1.008	0.170175
ETH-2	2021-08-17 11:52:00	18.4944	0.0560798	7.435	0.002	-1.462	0.001	5.549	0.025	-0.677	-3.103	0.088	-0.182	7.849	2.283	2.787	0.190742
ETH-2	2021-08-09 11:03:00	10.4604	-0.00163182	7.678	0.002	0.038	0.003	7.381	0.031	-0.581	-0.109	0.101	-0.186	5.429	2.478	-2.823	0.13303
ETH-2	2021-08-02 11:52:00	3.49444	0.00355174	7.191	0.003	-2.032	0.004	4.701	0.024	-0.709	-4.302	0.083	-0.244	3.147	7.678	-0.513	0.138214
ETH-2	2021-10-27 18:18:00	89.7625	0.0483223	6.974	0.004	-2.57	0.008	4.006	0.021	-0.649	-5.354	0.176	-0.222	9.337	11.816	6.952	0.182984
ETH-2	2021-10-16 23:50:00	78.9931	-0.02536	7.073	0.004	-2.408	0.01	4.267	0.023	-0.651	-5.088	0.154	-0.28	1.596	7.967	-1.195	0.109302
ETH-2	2021-10-11 18:38:00	73.7764	-0.00199705	6.977	0.002	-2.804	0.008	3.732	0.027	-0.695	-5.871	0.091	-0.272	0.345	4.666	-1.562	0.132665
ETH-2	2021-09-28 11:25:00	60.4757	0.0386397	7.028	0.002	-2.495	0.007	4.124	0.013	-0.661	-5.21	0.032	-0.228	1.359	4.908	-1.212	0.173302
ETH-2	2021-09-21 11:44:00	53.4889	0.0281896	7.338	0.001	-1.9	0.004	5.002	0.023	-0.692	-4.014	0.098	-0.219	2.782	6.607	-1.293	0.162852
ETH-2	2021-09-14 12:40:00	46.5278	-0.0113434	7.517	0.003	-1.079	0.005	6.006	0.019	-0.684	-2.384	0.096	-0.228	6.266	4.077	0.37	0.123319
ETH-2	2021-09-08 10:53:00	40.4535	-0.0178785	7.01	0.002	-2.619	0.006	3.95	0.025	-0.694	-5.511	0.107	-0.28	0.991	5.871	-1.315	0.116784
ETH2	2021-11-09 15:45:00	102.656	-0.00592064	7.384	0.003	-1.564	0.008	5.37	0.03	-0.703	-3.363	0.09	-0.238	21.857	9.051	16.983	0.128742
ETH-2	2021-12-19 11:19:00	142.472	0.0536189	7.394	0.006	-1.006	0.006	6.023	0.032	-0.613	-2.147	0.143	-0.137	8.343	4.901	2.423	0.188281
ETH-2	2021-12-29 12:27:00	152.519	0.0387376	7.47	0.006	-0.887	0.005	6.176	0.024	-0.654	-1.924	0.124	-0.15	6.218	7.03	-0.003	0.1734
ETH-2	2022-01-02 11:30:00	156.479	0.0540963	7.442	0.005	-0.796	0.005	6.271	0.026	-0.622	-1.724	0.078	-0.133	6.402	4.774	0.029	0.188758
ETH-2	2022-01-28 13:34:00	182.565	0.034081	7.454	0.011	-0.787	0.021	6.325	0.032	-0.589	-1.726	0.108	-0.153	16.982	3.485	10.512	0.168743
eth-2	2022-02-10 11:33:00	195.481	-0.013401	7.325	0.008	-1.769	0.011	5.138	0.042	-0.67	-3.745	0.069	-0.21	7.225	3.447	2.89	0.121261
eth-2	2022-02-16 11:27:00	201.477	0.0119799	7.404	0	-1.8	0.006	5.217	0.047	-0.642	-3.784	0.113	-0.189	4.51	10.324	0.163	0.146642
ETH-2	2022-02-25 11:19:00	210.472	0.0553677	7.946	0.003	-1.433	0.007	6.13	0.028	-0.652	-3.008	0.079	-0.143	11.279	1.974	5.599	0.19003
ETH-2	2022-03-03 11:52:00	216.494	0.0548351	7.483	0.005	-1.373	0.007	5.733	0.023	-0.631	-2.887	0.117	-0.142	6.984	6.142	1.701	0.189497
ETH-2	2022-03-08 13:20:00	221.556	0.0617779	7.275	0.002	-1.825	0.004	5.073	0.011	-0.629	-3.794	0.083	-0.147	6.836	11.59	2.666	0.19644
ETH-2	2022-03-17 11:39:00	230.485	0.0303362	7.51	0.005	-1.112	0.007	6.002	0.04	-0.648	-2.374	0.101	-0.152	11.644	5.366	5.79	0.164998
ETH-2	2022-04-04 11:07:00	248.463	-0.0193851	19.193	0.005	14.145	0.009	33.353	0.039	-0.623	28.708	0.081	0.212	40.527	5.705	-8.122	0.115277
ETH-2	2022-03-30 12:12:00	243.508	0.023827	7.455	0.006	-1.335	0.009	5.739	0.03	-0.634	-2.831	0.083	-0.163	6.664	6.822	1.337	0.158489
ETH-2	2022-04-05 11:38:00	249.485	0.0645486	7.076	0.004	-2.487	0.006	4.178	0.027	-0.665	-5.128	0.125	-0.161	-3.112	8.649	-5.737	0.199211
ETH-2	2022-04-12 09:07:00	256.38	0.0217089	7.458	0.013	-1.615	0.026	5.453	0.032	-0.645	-3.398	0.097	-0.172	6.998	5.178	2.218	0.156371
ETH3	2022-04-13 07:23:00	257.308	0.00584711	7.537	0.015	-1.327	0.029	5.819	0.038	-0.646	-2.829	0.085	-0.177	3.449	6.447	-1.962	0.140509
ETH-2	2022-04-20 12:44:00	264.531	0.0678386	7.518	0.007	-0.749	0.014	6.425	0.041	-0.592	-1.6	0.092	-0.102	7.855	7.615	1.301	0.202501
ETH-2	2022-04-29 08:28:00	273.353	0.0726081	7.404	0.011	-1.593	0.013	5.358	0.024	-0.705	-3.303	0.042	-0.119	5.16	0.973	0.404	0.20727
ETH-2	2022-05-11 00:05:00	285.003	0.0441099	7.911	0.008	-1.163	0.016	6.374	0.019	-0.639	-2.457	0.085	-0.132	3.224	3.077	-2.904	0.178772
ETH-2	2022-05-13 01:29:00	287.062	0.0360923	7.472	0.037	-1.539	0.071	5.579	0.097	-0.609	-3.224	0.143	-0.148	5.117	3.401	0.183	0.170754
ETH-2	2022-05-16 00:45:00	290.031	-0.0178828	7.396	0.008	-1.828	0.018	5.133	0.036	-0.691	-3.851	0.074	-0.2	3.103	5.485	-1.175	0.116779
ETH-2	2022-06-02 09:59:00	307.416	-0.0422628	7.579	0.023	-1.775	0.042	5.357	0.049	-0.708	-3.779	0.105	-0.234	0.076	5.751	-4.486	0.0923994
ETH-2	2022-06-01 11:07:00	306.463	-0.0222588	7.22	0.021	-2.115	0.035	4.606	0.04	-0.752	-4.446	0.148	-0.222	6.692	3.548	3.153	0.112403
ETH-2	2022-06-07 10:23:00	312.433	0.0333337	7.294	0.019	-1.939	0.034	4.932	0.053	-0.677	-4.037	0.104	-0.164	11.821	7.213	7.835	0.167996
ETH-2	2022-06-11 13:14:00	316.551	0.0552996	7.377	0.005	-1.82	0.011	5.135	0.025	-0.678	-3.776	0.114	-0.14	38.443	8.164	34.018	0.189962
ETH-2	2022-06-24 09:32:00	329.397	-0.0351049	7.315	0.02	-2.046	0.027	4.785	0.062	-0.739	-4.32	0.168	-0.233	3.608	10.272	-0.158	0.0995573
ETH-2	2022-06-28 12:14:00	333.51	0.00413402	7.288	0.023	-2.055	0.034	4.806	0.032	-0.682	-4.301	0.117	-0.195	4.822	3.384	1.099	0.138796
ETH-2	2022-07-02 13:38:00	337.568	-0.00633827	7.503	0.037	-1.637	0.061	5.45	0.064	-0.673	-3.467	0.132	-0.196	2.134	3.062	-2.627	0.128324
ETH-2	2022-07-12 13:34:00	347.565	0.0194846	7.487	0.053	-1.574	0.097	5.517	0.137	-0.651	-3.29	0.144	-0.144	6.49	7.382	1.603	0.154147
ETH-2	2022-07-20 13:01:00	355.542	-0.0290474	7.42	0.042	-1.757	0.081	5.236	0.12	-0.682	-3.7	0.224	-0.19	4.478	6.826	0.029	0.105615
ETH-2	2022-07-30 16:07:00	365.672	-0.0354286	7.471	0.015	-1.72	0.05	5.284	0.079	-0.723	-3.632	0.088	-0.195	2.123	4.02	-2.441	0.0992336
ETH-2	2022-08-11 12:55:00	377.538	-0.0122295	7.532	0.024	-1.515	0.051	5.608	0.066	-0.666	-3.228	0.091	-0.202	3.851	3.207	-1.19	0.122433
ETH-2	2022-08-17 14:14:00	383.593	-0.00610894	7.51	0.016	-1.644	0.037	5.393	0.068	-0.729	-3.483	0.071	-0.197	2.672	5.315	-2.084	0.128553
ETH-2	2022-08-26 12:52:00	392.536	0.00682135	7.452	0.009	-1.656	0.024	5.342	0.056	-0.709	-3.492	0.1	-0.183	3.251	4.31	-1.424	0.141484
ETH-2	2022-08-30 12:23:00	396.516	-0.00194197	7.355	0.007	-1.841	0.017	5.067	0.049	-0.701	-3.873	0.082	-0.195	1.962	1.321	-2.242	0.13272
ETH-2	2022-09-06 13:29:00	403.562	0.0376553	7.359	0.008	-1.867	0.015	5.05	0.033	-0.698	-3.881	0.078	-0.152	5.519	3.35	1.347	0.172317
ETH-2	2022-09-21 23:51:00	418.994	-0.028843	7.372	0.006	-1.768	0.006	5.156	0.022	-0.703	-3.675	0.08	-0.143	3.412	4.106	-0.961	0.105819
ETH-2	2022-09-27 20:46:00	424.865	-0.0327624	7.239	0.01	-1.818	0.018	4.941	0.035	-0.73	-3.78	0.124	-0.147	5.857	4.886	1.716	0.1019
ETH-2	2022-10-06 09:27:00	433.394	-0.0210984	7.317	0.006	-1.801	0.009	5.088	0.026	-0.681	-3.734	0.05	-0.136	6.243	3.284	1.983	0.113564
ETH-2	2022-10-18 17:30:00	445.729	0.0151815	7.39	0.015	-1.925	0.03	5.038	0.06	-0.684	-3.949	0.075	-0.103	4.25	2.987	0.165	0.149844
ETH-2	2022-10-25 19:27:00	452.81	-0.0300202	7.339	0.037	-1.901	0.084	4.973	0.137	-0.72	-3.942	0.354	-0.145	12.308	2.265	8.196	0.104642
ETH-2	2022-11-11 17:39:00	469.735	-0.0538607	7.472	0.034	-1.592	0.072	5.454	0.139	-0.682	-3.255	0.188	-0.075	8.689	4.559	3.84	0.0808015
ETH-2	02/13/23	593	-0.0107029	7.437	0.002	-1.377	0.004	5.602	0.03	-0.709	-2.84	0.123	-0.088	8.367	2.363	3.134	0.123959
ETH-2	02/24/23	604	-0.00710844	7.457	0.001	-1.521	0.002	5.497	0.025	-0.693	-3.206	0.133	-0.166	4.614	3.736	-0.338	0.127554
ETH-2	02/27/23	607	0.0667449	7.636	0.002	-1.113	0.003	6.116	0.046	-0.663	-2.32	0.089	-0.094	12.253	2.793	6.264	0.201407
ETH-2	03/10/23	618	0.0596653	7.567	0.003	-1.285	0.004	5.851	0.034	-0.685	-2.672	0.112	-0.103	9.924	3.126	4.363	0.194327
ETH-2	03/14/23	622	-0.0341974	7.488	0.007	-1.297	0.008	5.779	0.046	-0.664	-2.761	0.135	-0.169	2.328	8.003	-3.085	0.100465
ETH-2	03/26/23	634	-0.0283477	7.464	0.003	-1.42	0.005	5.632	0.035	-0.665	-3.003	0.076	-0.166	3.282	3.453	-1.87	0.106315
ETH-2	04/06/23	645	0.00949348	7.476	0.003	-1.472	0.006	5.598	0.041	-0.66	-3.074	0.119	-0.133	4.178	2.239	-0.889	0.144156
ETH-2	04/18/23	657	0.0588648	7.465	0.004	-1.27	0.006	5.79	0.034	-0.657	-2.623	0.061	-0.085	6.936	4.189	1.468	0.193527
ETH-2	04/26/23	665	-0.026895	7.547	0.005	-1.491	0.007	5.645	0.048	-0.667	-3.145	0.155	-0.166	4.154	2.684	-0.95	0.107767
ETH-3	2021-08-10 11:20:00	11.4722	0.0502234	19.165	0.003	15.243	0.005	34.769	0.02	-0.289	31.144	0.023	0.413	38.537	5.962	-12.093	0.292634
eth-3	2021-08-03 12:22:00	4.51528	-0.0029534	19.127	0.001	15.289	0.004	34.721	0.041	-0.342	31.192	0.111	0.369	35.582	7.723	-14.952	0.239457
ETH-3 NEW	2021-10-12 18:01:00	74.7507	-0.0148288	7.182	0.005	-2.107	0.01	4.858	0.061	-0.47	-4.379	0.113	-0.17	4.432	7.687	0.925	0.227582
ETH-3 OLD	2021-10-12 21:31:00	74.8965	0.00574677	7.193	0.002	-2.092	0.005	4.926	0.028	-0.428	-4.332	0.082	-0.152	6.401	2.824	2.847	0.248157
ETH-3	2021-09-22 11:40:00	54.4861	0.0355	18.866	0.003	14.642	0.003	33.85	0.018	-0.293	29.892	0.02	0.382	30.81	2.405	-17.995	0.277911
ETH-3	2021-09-15 11:14:00	47.4681	0.0364311	18.972	0.003	14.975	0.006	34.299	0.016	-0.288	30.579	0.069	0.393	29.766	3.412	-19.729	0.278842
ETH-3	2022-01-10 00:14:00	164.01	0.0207256	19.14	0.002	15.283	0.004	34.786	0.039	-0.286	31.02	0.141	0.214	51.957	9.386	0.623	0.263136
ETH-3	2022-02-12 23:07:00	197.963	0.0281387	19.258	0.004	15.431	0.007	35.039	0.034	-0.306	31.332	0.094	0.224	71.598	7.642	18.886	0.270549
ETH-3	2022-02-17 11:37:00	202.484	-0.0496764	7.159	0.003	-2.232	0.008	4.76	0.039	-0.421	-4.617	0.034	-0.16	-1.317	9.977	-4.535	0.192734
ETH-3	2022-02-22 07:47:00	207.324	-0.0197505	19.167	0.018	15.264	0.035	34.792	0.049	-0.289	31.062	0.177	0.293	79.447	8.343	26.78	0.22266
ETH-3	2022-02-26 14:08:00	211.589	-0.0515568	19.159	0.006	15.192	0.012	34.736	0.048	-0.266	30.887	0.114	0.264	66.937	8.392	15.031	0.190854
ETH-3	2022-03-11 11:23:00	224.474	-0.0106904	18.997	0.001	14.855	0.005	34.232	0.03	-0.262	30.264	0.12	0.323	65.581	5.501	14.574	0.23172
ETH-3	2022-04-06 11:38:00	250.485	0.0131538	19.15	0.004	15.573	0.009	35.113	0.041	-0.26	31.761	0.133	0.361	55.137	3.088	3.075	0.255564
ETH-3	2022-04-01 07:25:00	245.309	-0.00262773	19.139	0.006	15.591	0.016	35.1	0.01	-0.28	31.785	0.073	0.349	82.319	5.644	28.891	0.239783
ETH-3	2022-04-16 10:21:00	260.431	0.00862971	19.16	0.005	15.407	0.009	34.929	0.022	-0.289	31.416	0.143	0.353	66.684	11.02	14.367	0.25104
ETH-3	2022-04-23 16:49:00	267.701	-0.0197177	19.228	0.024	15.185	0.047	34.813	0.079	-0.254	30.924	0.092	0.314	66.91	6.574	14.946	0.222693
ETH-3	2022-05-08 09:37:00	282.401	0.0547607	19.191	0.027	15.465	0.058	35.041	0.068	-0.267	31.565	0.116	0.383	61.518	5.212	9.308	0.297171
ETH-3	2022-05-11 15:33:00	285.648	-0.0425404	19.123	0.024	15.263	0.047	34.783	0.068	-0.252	31.065	0.105	0.297	52.147	6.72	0.861	0.19987
ETH-3	2022-05-17 00:58:00	291.04	-0.041399	19.17	0.029	15.344	0.056	34.894	0.066	-0.271	31.233	0.092	0.3	46.449	3.417	-4.766	0.201011
ETH-3	2022-05-20 11:08:00	294.464	-0.0348306	19.25	0.009	15.682	0.017	35.333	0.033	-0.255	31.934	0.049	0.314	61.142	3.021	8.465	0.20758
ETH-3	2022-05-30 12:18:00	304.512	-0.0313824	19.079	0.009	15.331	0.018	34.772	0.04	-0.284	31.215	0.187	0.308	53.276	5.894	1.848	0.211028
ETH-3	2022-06-03 11:04:00	308.461	-0.0401646	19.138	0.018	15.312	0.034	34.815	0.036	-0.284	31.118	0.125	0.252	57.645	11.059	5.979	0.202246
ETH-3	2022-06-09 09:39:00	314.402	-0.0345483	18.966	0.016	14.755	0.028	34.03	0.024	-0.328	29.979	0.087	0.245	82.388	5.797	30.811	0.207862
ETH-3	2022-06-15 12:13:00	320.509	0.0318574	19.227	0.013	15.305	0.025	34.845	0.044	-0.339	31.176	0.147	0.322	65.671	8.599	13.531	0.274268
ETH-3	2022-06-20 11:39:00	325.485	-0.00450667	19.234	0.013	15.368	0.022	35	0.03	-0.257	31.27	0.118	0.288	75.906	3.317	23.134	0.237904
ETH-3	2022-06-21 12:53:00	326.537	0.0174673	19.139	0.013	15.127	0.012	34.64	0.041	-0.275	30.796	0.074	0.304	75.753	2.801	23.568	0.259878
ETH-3	2022-06-29 12:28:00	334.519	0.00803565	19.249	0.02	15.493	0.033	35.122	0.04	-0.276	31.538	0.095	0.303	63.275	7.219	10.862	0.250446
ETH-3	2022-07-04 23:45:00	339.99	0.00851803	19.202	0.057	15.338	0.093	34.877	0.122	-0.314	31.22	0.129	0.3	45.465	6.138	-5.723	0.250928
ETH-3	2022-07-13 13:54:00	348.579	0.0379701	19.169	0.067	15.231	0.129	34.764	0.203	-0.286	30.962	0.291	0.261	36.325	3.243	-14.179	0.280381
ETH-3	2022-07-16 13:00:00	351.542	0.0290315	19.222	0.035	15.338	0.069	34.887	0.105	-0.325	31.174	0.221	0.255	49.539	3.654	-1.869	0.271442
ETH-3	2022-07-21 12:05:00	356.503	0.00807143	19.202	0.062	15.367	0.133	34.936	0.225	-0.286	31.214	0.339	0.237	49.882	6.863	-1.579	0.250482
ETH-3	2022-07-31 15:40:00	366.653	-0.0291869	19.253	0.01	15.475	0.043	35.006	0.099	-0.374	31.401	0.117	0.206	56.791	2.421	4.729	0.213224
ETH-3	2022-08-03 16:12:00	369.675	-0.0395126	19.229	0.067	15.425	0.131	35.031	0.181	-0.276	31.289	0.265	0.196	55.047	3.92	3.194	0.202898
ETH-3	2022-08-12 13:36:00	378.567	-0.00153438	19.318	0.021	15.542	0.046	35.205	0.062	-0.312	31.483	0.037	0.152	52.525	4.431	0.476	0.240876
ETH-3	2022-08-18 13:58:00	384.582	-0.0452358	19.249	0.028	15.455	0.068	35.05	0.12	-0.307	31.254	0.106	0.103	59.27	4.556	7.13	0.197175
ETH-3	2022-08-27 16:35:00	393.691	0.0106612	19.274	0.003	15.516	0.007	35.122	0.03	-0.323	31.443	0.076	0.165	53.961	3.474	1.936	0.253072
ETH-3	2022-08-31 12:57:00	397.54	-0.0611827	19.292	0.008	15.413	0.028	35.023	0.038	-0.337	31.152	0.059	0.085	58.625	2.545	6.552	0.181228
ETH-3	2022-09-07 13:28:00	404.561	-0.0183726	19.231	0.009	15.349	0.019	34.923	0.045	-0.309	31.068	0.077	0.131	56.125	4.901	4.365	0.224038
ETH-3	2022-09-14 14:20:00	411.597	-0.0561542	19.267	0.021	15.376	0.042	34.997	0.067	-0.301	31.08	0.149	0.09	43.987	5.278	-7.268	0.186256
ETH-3	2022-09-23 21:36:00	420.9	0.00598574	19.042	0.021	15.594	0.039	34.98	0.064	-0.3	31.542	0.169	0.109	45.374	5.123	-6.133	0.248396
ETH-3	2022-09-29 12:22:00	426.515	-0.00619511	19.123	0.013	15.357	0.02	34.862	0.033	-0.266	31.048	0.088	0.096	62.054	3.484	10.101	0.236215
ETH-3	2022-10-07 11:30:00	434.479	0.0105071	19.245	0.009	15.562	0.01	35.205	0.02	-0.258	31.482	0.068	0.113	62.534	2.92	10.028	0.252918
ETH-3	2022-10-13 17:26:00	440.726	0.0323734	19.243	0.013	15.504	0.023	35.127	0.035	-0.275	31.385	0.051	0.133	56.611	6.444	4.513	0.274784
ETH-3	2022-10-19 14:06:00	446.588	0.0393312	19.18	0.015	15.288	0.023	34.828	0.035	-0.29	30.952	0.074	0.138	59.24	4.82	7.499	0.281742
ETH-3	2022-10-26 17:39:00	453.735	-0.0144973	18.953	0.045	15.32	0.102	34.589	0.192	-0.323	30.965	0.318	0.088	43.569	4.678	-7.233	0.227913
ETH-3	2022-11-06 13:15:00	464.552	0.0194469	19.27	0.015	15.493	0.034	35.19	0.081	-0.23	31.391	0.107	0.161	57.66	3.859	5.504	0.261857
ETH-3	02/27/23	607	-0.0192989	19.095	0.001	15.157	0.002	34.54	0.015	-0.356	30.625	0.075	0.079	37.877	4.811	-12.483	0.223112
ETH-3	03/06/23	614	-0.0169276	19.293	0.002	15.551	0.003	35.17	0.028	-0.329	31.429	0.094	0.083	29.969	0.396	-20.956	0.225483
ETH-3	03/15/23	623	-0.0381684	19.307	0.005	15.528	0.003	35.149	0.055	-0.342	31.477	0.085	0.174	33.055	1.75	-17.995	0.204242
ETH-3	03/20/23	628	0.0166394	19.247	0.002	15.487	0.003	35.076	0.02	-0.312	31.443	0.125	0.222	38.18	3.462	-12.983	0.25905
ETH-3	03/30/23	638	-0.033959	19.227	0.002	15.483	0.004	35.049	0.02	-0.313	31.387	0.047	0.177	32.173	3.426	-18.664	0.208451
ETH-3	03/25/23	633	0.00443006	19.525	0.003	15.166	0.004	34.656	0.032	-0.688	30.775	0.129	0.206	54.044	5.299	2.43	0.246841
ETH-3	04/07/23	646	0.00245446	19.534	0.002	14.965	0.005	34.456	0.036	-0.695	30.36	0.122	0.201	56.802	5.653	5.436	0.244865
ETH-3	04/11/23	650	0.0560832	19.279	0.003	15.797	0.004	35.396	0.031	-0.335	32.113	0.114	0.262	53.571	5.032	1.017	0.298494
ETH-3	04/14/23	653	0.0256826	19.191	0.003	15.361	0.006	34.899	0.02	-0.304	31.193	0.158	0.228	61.009	3.405	9.027	0.268093
ETH-3	04/23/23	662	0.00805485	19.246	0.005	15.434	0.008	35.087	0.045	-0.249	31.389	0.192	0.275	25.258	3.519	-25.165	0.250465
ETH-3	04/27/23	666	-0.00847085	19.328	0.002	15.693	0.003	35.394	0.033	-0.286	31.905	0.122	0.265	22.57	1.421	-28.293	0.23394
ETH-3	05/04/23	673	-0.0245311	19.261	0.003	15.501	0.006	35.05	0.038	-0.364	31.496	0.092	0.247	21.568	2.917	-28.816	0.217879
ETH-4	2021-08-26 13:39:00	27.5687	0.0238755	7.485	0.002	-1.482	0.002	5.785	0.044	-0.474	-3.135	0.111	-0.174	2.967	4.942	-2.084	0.200822
ETH-4	2021-08-04 11:56:00	5.49722	-0.0105765	7.35	0.001	-1.734	0.004	5.401	0.034	-0.469	-3.675	0.145	-0.211	3.324	3.217	-1.091	0.16637
ETH-4	2021-10-23 08:32:00	85.3556	0.0461171	6.964	0.008	-2.178	0.01	4.604	0.013	-0.43	-4.527	0.042	-0.176	18.155	14.753	14.976	0.223064
ETH-4	2021-10-18 00:53:00	80.0368	0.0428117	6.814	0.004	-3.314	0.009	3.311	0.021	-0.445	-6.828	0.106	-0.213	3.747	6.493	3.014	0.219758
ETH-4	2021-09-25 16:00:00	57.6667	0.011414	6.947	0.003	-1.759	0.003	5.014	0.02	-0.416	-3.708	0.12	-0.193	7.01	2.304	3.057	0.188361
ETH-4	2021-09-16 11:14:00	48.4681	-0.0188866	7.079	0.002	-2.03	0.003	4.854	0.031	-0.445	-4.281	0.136	-0.227	3.516	4.446	-0.031	0.15806
ETH4	2021-11-09 12:24:00	102.517	-0.0330771	7.454	0.007	-1.395	0.012	5.846	0.025	-0.467	-3.008	0.115	-0.22	10.944	8.211	5.714	0.14387
ETH-4	2021-11-12 09:59:00	105.416	-0.0367185	7.35	0.004	-1.69	0.009	5.453	0.038	-0.461	-3.609	0.128	-0.232	20.98	6.416	16.4	0.140228
ETH-4	2021-12-17 23:38:00	140.985	-0.00738819	7.495	0.004	-1.134	0.005	6.197	0.041	-0.417	-2.424	0.012	-0.158	5.404	2.627	-0.355	0.169558
ETH-4	2022-01-05 11:19:00	159.472	-0.0361768	7.062	0.005	-2.328	0.003	4.519	0.015	-0.468	-4.856	0.101	-0.207	5.11	4.041	2.163	0.14077
ETH-4	2022-01-10 11:47:00	164.491	0.0554215	7.226	0.003	-2.102	0.006	4.933	0.022	-0.446	-4.31	0.063	-0.111	7.173	10.126	3.6	0.232368
ETH4	2022-02-17 11:37:00	202.484	0.0227253	7.159	0.004	-2.229	0.006	4.764	0.047	-0.42	-4.606	0.031	-0.154	-5.08	8.023	-8.292	0.199672
ETH4	2022-02-14 07:13:00	199.301	0.0277008	7.339	0.005	-1.909	0.003	5.285	0.009	-0.401	-3.956	0.003	-0.142	19.979	12.464	15.853	0.204647
ETH-4	2022-02-18 11:56:00	203.497	-0.0208217	7.344	0.002	-1.928	0.006	5.218	0.041	-0.454	-4.036	0.109	-0.184	5.231	8.264	1.197	0.156125
ETH-4	2022-02-22 11:55:00	207.497	0.0394349	7.177	0.004	-2.035	0.005	4.995	0.016	-0.4	-4.2	0.098	-0.135	2.784	8.399	-0.853	0.216382
ETH-4	2022-02-28 14:58:00	213.624	0.0234355	7.32	0.01	-2.048	0.021	5.094	0.036	-0.436	-4.239	0.084	-0.149	5.826	6.607	2.05	0.200382
ETH-4	2022-03-05 12:38:00	218.526	-0.0306888	7.32	0.004	-1.992	0.008	5.136	0.04	-0.448	-4.174	0.091	-0.194	2.84	13.918	-1.033	0.146258
ETH-4	2022-03-20 13:24:00	233.558	0.0432096	7.451	0.003	-1.549	0.006	5.735	0.019	-0.422	-3.215	0.073	-0.12	9.2	1.502	4.287	0.220156
ETH-4	2022-03-27 15:56:00	240.664	-0.0114778	7.36	0.005	-1.966	0.008	5.208	0.016	-0.443	-4.1	0.083	-0.174	12.333	6.464	8.328	0.165469
ETH-4	2022-04-08 13:32:00	252.564	0.0566597	7.397	0.005	-1.807	0.006	5.411	0.029	-0.436	-3.726	0.126	-0.116	-1.63	5.333	-5.93	0.233606
ETH-4	2022-04-01 11:36:00	245.483	0.0584925	7.235	0.003	-2.243	0.012	4.888	0.038	-0.36	-4.608	0.133	-0.126	21.233	4.991	17.884	0.235439
ETH-4	2022-04-22 13:18:00	266.554	0.0317729	7.334	0.008	-1.561	0.016	5.596	0.027	-0.429	-3.237	0.089	-0.117	4.555	17.449	-0.188	0.20872
ETH-4	2022-04-30 09:09:00	274.381	0.0729959	7.244	0.014	-2.095	0.028	4.986	0.031	-0.418	-4.282	0.064	-0.096	25.093	2.833	21.424	0.249943
ETH-4	2022-05-06 00:38:00	280.026	0.0349902	7.304	0.034	-1.951	0.067	5.187	0.077	-0.421	-4.022	0.126	-0.124	2.65	3.512	-1.286	0.211937
ETH-4	2022-05-13 14:57:00	287.623	0.0722451	7.343	0.011	-1.426	0.016	5.753	0.02	-0.416	-2.929	0.06	-0.08	7.277	4.765	2.244	0.249192
ETH-4	2022-05-17 23:16:00	291.969	0.07996	7.317	0.026	-2.006	0.045	5.117	0.044	-0.449	-4.096	0.115	-0.088	91.69	7.041	87.508	0.256907
ETH-4	2022-05-23 00:09:00	297.006	0.0513423	7.36	0.008	-1.854	0.016	5.33	0.044	-0.432	-3.812	0.063	-0.108	4.238	4.843	0.045	0.228289
ETH-4	2022-06-04 14:23:00	309.599	-0.00897657	7.293	0.019	-1.665	0.033	5.411	0.045	-0.469	-3.484	0.141	-0.158	7.52	3.544	3.012	0.16797
ETH-4	2022-06-10 10:36:00	315.442	0.00631373	7.247	0.016	-2.069	0.031	4.983	0.056	-0.451	-4.285	0.158	-0.152	9.262	9.92	5.593	0.18326
ETH-4	2022-06-14 12:40:00	319.528	0.0509249	7.273	0.01	-2.089	0.018	4.983	0.036	-0.456	-4.282	0.152	-0.109	2.869	5.542	-0.763	0.227872
ETH-4	2022-06-19 12:33:00	324.523	0.0412526	7.297	0.012	-2.07	0.023	5.035	0.033	-0.449	-4.253	0.138	-0.118	2.607	7.337	-1.088	0.218199
ETH-4	2022-06-23 10:14:00	328.426	0.0329085	7.26	0.015	-2.201	0.023	4.837	0.055	-0.479	-4.525	0.107	-0.129	6.339	4.548	2.928	0.209855
ETH-4	2022-06-30 17:21:00	335.723	0.0502891	7.32	0.033	-2.015	0.053	5.13	0.065	-0.432	-4.134	0.073	-0.108	4.709	5.665	0.873	0.227236
ETH-4	2022-07-06 13:26:00	341.56	0.0122443	7.335	0.029	-1.967	0.047	5.17	0.049	-0.454	-4.075	0.14	-0.144	0.536	6.011	-3.393	0.189191
ETH-4	2022-07-15 13:21:00	350.556	0.0603293	7.275	0.019	-2.116	0.043	4.956	0.074	-0.459	-4.308	0.094	-0.08	1.15	7.445	-2.426	0.237276
ETH-4	2022-07-22 13:12:00	357.55	0.0162713	7.294	0.068	-2.065	0.131	5.034	0.162	-0.451	-4.243	0.225	-0.118	2.082	5.068	-1.618	0.193218
ETH-4	2022-07-28 13:57:00	363.581	-0.0315034	7.43	0.019	-1.882	0.039	5.315	0.071	-0.492	-3.916	0.125	-0.157	4.34	12.908	0.127	0.145443
ETH-4	2022-08-04 16:09:00	370.673	-0.0484079	7.449	0.007	-1.713	0.016	5.48	0.04	-0.512	-3.591	0.13	-0.169	4.106	7.194	-0.458	0.128539
ETH-4	2022-08-14 13:03:00	380.544	-0.00810599	7.351	0.035	-1.958	0.076	5.175	0.12	-0.475	-4.069	0.14	-0.157	3.98	5.236	0.002	0.168841
ETH-4	2022-08-20 13:09:00	386.548	-0.00422862	7.423	0.023	-1.823	0.055	5.361	0.099	-0.496	-3.794	0.163	-0.151	5.496	4.141	1.171	0.172718
ETH-4	2022-08-28 14:16:00	394.594	0.0100385	7.339	0.003	-1.947	0.011	5.174	0.036	-0.475	-4.027	0.13	-0.137	6.87	4.349	2.872	0.186985
ETH-4	2022-09-01 13:22:00	398.557	0.0225703	7.465	0.001	-1.772	0.005	5.493	0.024	-0.459	-3.661	0.063	-0.121	10.053	3.161	5.561	0.199517
ETH-4	2022-09-08 13:34:00	405.565	0.0645144	7.386	0.003	-1.841	0.008	5.339	0.003	-0.462	-3.754	0.066	-0.076	6.081	3.952	1.827	0.241461
ETH-4	2022-09-15 23:54:00	412.996	0.0450443	7.375	0.001	-1.817	0.006	5.356	0.037	-0.458	-3.728	0.088	-0.097	3.787	4.598	-0.493	0.221991
ETH-4	2022-09-25 19:38:00	422.818	0.0511942	7.281	0.006	-1.783	0.008	5.305	0.037	-0.446	-3.593	0.108	-0.029	5.343	3.374	1.09	0.228141
ETH-4	2022-09-30 13:43:00	427.572	0.0483978	7.339	0.006	-1.841	0.019	5.274	0.049	-0.48	-3.711	0.165	-0.032	7.462	3.265	3.252	0.225344
ETH-4	2022-10-09 11:49:00	436.492	0.0655537	7.209	0.007	-1.989	0.013	5.042	0.012	-0.431	-3.991	0.105	-0.017	18.003	3.545	14.185	0.2425
ETH4	2022-10-20 12:24:00	447.517	0.060015	7.231	0.024	-1.964	0.053	4.992	0.097	-0.528	-3.947	0.11	-0.022	4.478	2.998	0.637	0.236962
ETH-4	2022-10-22 19:11:00	449.799	0.0108344	7.153	0.025	-1.688	0.053	5.167	0.116	-0.546	-3.439	0.149	-0.066	9.272	3.585	4.95	0.187781
ETH-4	02/17/23	597	-0.00866369	7.474	0.004	-0.763	0.002	6.503	0.033	-0.457	-1.561	0.12	-0.036	3.508	1.799	-2.946	0.168283
ETH-4	02/27/23	607	0.0586649	7.286	0.003	-1.939	0.005	5.097	0.021	-0.504	-3.839	0.106	0.036	2.264	2.714	-1.676	0.235612
ETH-4	03/03/23	611	0.0216422	7.373	0.002	-1.588	0.005	5.557	0.016	-0.481	-3.277	0.074	-0.104	2.89	2.546	-1.834	0.198589
ETH-4	03/14/23	622	0.0173809	7.567	0.003	-1.285	0.004	5.851	0.034	-0.685	-2.672	0.112	-0.103	9.924	3.126	4.363	0.194327
ETH-4	04/15/23	654	0.0342602	7.533	0.002	-1.426	0.003	5.934	0.014	-0.43	-2.922	0.077	-0.072	7.339	3.673	2.106	0.211207
ETH-4	04/28/23	667	0.0147734	7.526	0.002	-1.509	0.005	5.833	0.027	-0.442	-3.106	0.098	-0.091	3.937	2.542	-1.109	0.19172
ETH-4	05/04/23	673	0.0708398	7.72	0.003	-1.144	0.005	6.382	0.015	-0.454	-2.32	0.046	-0.034	5.077	1.535	-0.898	0.247786

## Sheet: Table S10 Equilibrated gases
Sample ID	Date	δ45	δ45 sd	δ46	δ46 sd	δ47	δ47 sd	Δ47	δ48	δ48 sd	Δ48	δ49	δ49 sd	Δ49
25C TANK A OH27	2021-07-27 10:38:00	-27.34	0.003	-6.259	0.003	-34.237	0.029	-0.027	-12.737	0.095	-0.262	-32.963	3.466	8.478
25C TANK D LS3	2021-07-27 13:43:00	1.113	0.002	9.277	0.003	10.261	0.029	-0.012	18.914	0.099	0.27	11.309	4.638	-8.043
25C TANK D LS10	2021-07-27 16:42:00	1.468	0.003	31.692	0.003	32.701	0.048	0.009	65.375	0.162	0.927	42.799	2.257	-20.705
25C Tank A OH27	2021-08-31 10:48:00	-27.383	0.002	-6.17	0.005	-34.198	0.033	-0.029	-12.518	0.113	-0.219	-26.352	5.119	15.242
25C Tank D LS10	2021-08-31 13:47:00	1.411	0.002	31.288	0.005	32.233	0.039	-0.001	64.666	0.081	1.044	46.401	2.666	-16.506
25C Tank D LS3	2021-08-31 16:59:00	1.036	0.004	9.042	0.005	9.966	0.034	0.004	18.48	0.121	0.309	15.12	5.323	-3.768
25C TANK A OH27	2021-10-20 16:13:00	-27.52	0.004	-6.851	0.009	-34.953	0.021	0.007	-13.836	0.082	-0.184	-61.02	11.053	-19.442
25C TANK D LS3	2021-10-20 21:41:00	0.886	0.004	8.602	0.009	9.375	0.034	0.001	17.408	0.217	0.127	32.691	11.138	14.506
TD LS3 25	2021-12-02 14:00:00	1.216	0.002	9.001	0.004	10.101	0.032	-0.009	17.992	0.206	-0.089	7.015	2.393	-11.834
TD LS10 25	2021-12-07 10:00:00	1.567	0.004	31.537	0.009	32.657	0.033	0.013	63.967	0.11	-0.095	27.245	2.379	-35.129
TA OH27 25	2021-12-07 13:19:00	-26.952	0.007	-6.298	0.006	-33.857	0.027	-0.009	-12.585	0.213	-0.029	-17.449	3.758	24.297
TA OH27 25	2021-12-15 10:12:00	-27.168	0.005	-6.411	0.003	-34.183	0.029	-0.006	-12.799	0.168	-0.019	-32.696	3.434	8.866
LS3 TD 25	2021-12-17 12:12:00	1.256	0.004	8.956	0.008	10.097	0.032	-0.011	18.078	0.214	0.084	14.647	3.745	-4.3
LS10 TD 25	2021-12-17 15:48:00	1.627	0.003	31.617	0.006	32.788	0.031	0.001	64.62	0.074	0.364	51.488	8.051	-12.572
LS3 TD 25	2021-12-22 12:08:00	1.258	0.003	9.108	0.003	10.256	0.03	-0.004	18.457	0.097	0.155	18.204	5.661	-1.109
TA OH27 25	2021-12-22 15:35:00	-27.14	0.006	-6.308	0.003	-34.056	0.028	-0.005	-12.656	0.181	-0.082	-37.441	5.681	3.683
LS10 TD 25	2021-12-22 18:48:00	1.527	0.004	31.322	0.004	32.386	0.029	-0.005	64.168	0.08	0.51	57.393	6.208	-6.364
TA OH27 25C	2022-02-14 10:58:00	-27.243	0.016	-6.108	0.033	-33.99	0.042	-0.025	-12.269	0.114	-0.091	-58.689	6.549	-18.748
TD LS3 25C	2022-02-14 14:03:00	1.114	0.033	8.862	0.059	9.903	0.059	0.035	18.016	0.079	0.209	34.622	6.17	15.642
TD LS10 25C	2022-02-14 17:39:00	1.588	0.025	31.874	0.047	33.018	0.058	0.019	65.587	0.089	0.773	100.158	2.509	32.67
25C TANK A OH27	2022-03-09 11:21:00	-27.318	0.009	-6.361	0.017	-34.289	0.019	-0.005	-12.771	0.084	-0.091	-56.916	5.996	-16.329
25C TANK D LS3	2022-03-09 14:12:00	0.965	0.038	8.848	0.074	9.743	0.102	0.044	17.992	0.14	0.214	24.737	7.693	6.125
25C TANK D LS10	2022-03-09 17:18:00	1.325	0.019	31.638	0.04	32.527	0.053	0.039	65.009	0.105	0.687	86.567	6.923	20.657
LS3 TD 25C	2022-04-14 13:02:00	1.26	0.014	9.104	0.029	10.282	0.031	0.024	18.597	0.09	0.302	26.063	3.54	6.609
LS10 TD 25C	2022-04-14 18:48:00	1.531	0.011	31.669	0.021	32.792	0.026	0.054	65.2	0.064	0.807	79.016	7.793	13.282
TA OH27 25C	2022-04-17 16:20:00	-27.21	0.017	-6.34	0.034	-34.16	0.026	-0.006	-12.81	0.078	-0.173	-49.161	5.146	-8.399
TA OH27 25C	2022-04-30 18:59:00	-27.188	0.02	-6.078	0.04	-33.883	0.056	-0.002	-12.22	0.067	-0.102	-43.289	4.702	-2.814
DLS10 25C	2022-05-27 20:58:00	1.506	0.019	32.158	0.041	33.279	0.09	0.086	66.181	0.115	0.779	70.221	5.833	4.114
DLS3 25C	2022-05-27 16:05:00	1.254	0.034	9.13	0.07	10.335	0.133	0.057	18.654	0.23	0.305	21.392	5.334	1.981
TA OH27 25C	2022-05-27 12:07:00	-27.075	0.035	-6.118	0.07	-33.785	0.115	0.019	-12.274	0.204	-0.077	-51.216	6.487	-11.123
DLS3 25C	2022-07-03 15:39:00	1.214	0.026	9.018	0.046	10.103	0.063	-0.022	18.32	0.156	0.199	21.314	4.729	2.166
DLS10 25C	2022-07-09 11:47:00	-27.203	0.049	-6.281	0.09	-34.046	0.098	0.046	-12.617	0.181	-0.096	-52.907	11.198	-12.427
DLS10 25C	2022-07-09 16:26:00	1.504	0.067	31.824	0.121	32.853	0.132	-0.006	65.382	0.2	0.678	72.945	6.982	7.311
DLS10 25C	2022-08-06 19:06:00	1.581	0.013	31.851	0.022	32.949	0.048	-0.019	65.26	0.163	0.511	62.733	6.895	-2.408
TA OH25 25C	2022-08-07 00:32:00	-26.96	0.05	1.706	0.109	-26.192	0.141	0.023	3.562	0.154	0.145	-26.148	3.606	-0.624
DLS3 25C	2022-08-07 12:45:00	1.296	0.019	8.946	0.037	10.123	0.072	-0.017	18.106	0.113	0.132	23.071	7.838	3.943
DLS10 25C	2022-08-12 17:05:00	1.75	0.04	31.801	0.089	33.102	0.122	0.004	64.987	0.191	0.352	68.757	4.203	3.162
DLS10 25C	2022-09-17 13:04:00	1.721	0.007	31.906	0.01	33.17	0.032	-0.002	65.086	0.092	0.24	69.392	4.4	3.587
TAOH 25 25C	2022-09-17 19:11:00	-26.918	0.004	2.096	0.006	-25.77	0.02	0.029	4.283	0.08	0.085	-24.549	3.916	0.205
DLS3 25C	2022-09-18 00:32:00	1.278	0.006	9.238	0.009	10.407	0.022	-0.001	18.7	0.111	0.136	19.519	3.938	-0.093
DLS10 25C	2022-11-01 15:49:00	1.723	0.011	31.81	0.038	33.166	0.079	0.084	64.908	0.189	0.259	63.959	5.47	-1.331
TA OH25 25C	2022-11-01 21:45:00	-26.886	0.009	1.997	0.028	-25.793	0.056	0.07	4.19	0.165	0.191	-22.032	4.021	2.948
DLS3 25C	2022-11-10 13:10:00	1.297	0.03	9.294	0.064	10.514	0.112	0.03	18.919	0.212	0.239	26.478	4.04	6.603
TA WICO3 25	2023-01-25 15:04:00	-26.944	0.003	-4.377	0.004	-31.958	0.043	0.051	-8.772	0.119	-0.037	-16.865	2.189	21.02
TD-LS3-25	2023-01-26 06:36:00	1.303	0.002	8.921	0.006	10.096	0.027	-0.027		0.111	0.383	17.591	1.712	-1.394
TD-LS10-25	2023-01-26 10:40:00	1.558	0.001	31.347	0.005	32.429	0.03	-0.018	63.935	0.09	0.243	32.112	3.29	-30.198
LS10 TD 25	2023-02-21 13:49:00	1.816	0.002	31.074	0.005	32.412	0.037	-0.041	63.711	0.096	0.562	43.397	3.84	-19.356
WICO3 TD 25	2023-02-21 16:38:00	-26.931	0.002	-3.478	0.004	-31.077	0.033	0.06	-6.978	0.116	-0.033	-19.202	3.533	16.775
TD LS3 25	2023-02-22 15:34:00	1.133	0.002	8.7	0.004	9.716	0.024	-0.011	17.721	0.123	0.242	17.84	4.411	-0.537
TA WICO 25	2023-04-03 12:20:00	-26.89	0.003	-3.374	0.003	-31.021	0.028	-0.029	-6.72	0.111	0.017	-16.789	3.224	19.021
TA LS10 25	2023-04-03 15:30:00	-25.393	0.002	31.417	0.002	3.87	0.029	0.062	64.607	0.112	0.738	24.971	2.17	-8.509
TD LS3 25	2023-04-04 06:43:00	1.207	0.002	9.401	0.005	10.518	0.026	0.023	19.303	0.203	0.268	18.028	5.481	-1.795
DLS3 25C	2023-05-11 22:57:00	1.226	0.003	9.227	0.006	10.339	0.028	-0.005	18.745	0.09	0.202	11.463	1.833	-7.916
TA WICO 25	2023-05-12 14:02:00	-26.664	0.003	-3.183	0.006	-30.513	0.027	0.067	-6.389	0.125	-0.033	-9.566	2.005	25.867
TA LS10 25	2023-05-12 18:25:00	-25.176	0.002	31.526	0.003	4.154	0.02	0.012	64.556	0.095	0.479	12.169	1.248	-21.329
50C TANK A OH27	2021-07-28 10:50:00	-27.49	0.001	-10.848	0.004	-38.888	0.038	-0.15	-22.018	0.081	-0.45	-32.342	8.156	18.503
50C TANK D LS3	2021-07-28 13:51:00	0.972	0.003	4.388	0.005	5.202	0.053	-0.117	9.052	0.067	0.254	9.554	3.505	-0.128
50C TANK D LS10	2021-07-28 16:53:00	1.541	0.003	27.076	0.004	28.119	0.023	-0.109	55.651	0.132	0.725	34.289	7.325	-20.185
50C Tank AOH27	2021-09-01 10:46:00	-27.574	0.002	-11.21	0.004	-39.329	0.038	-0.16	-22.719	0.165	-0.434	-33.715	3.288	17.884
50C Tank D LS3	2021-09-01 13:52:00	0.847	0.002	4.24	0.003	4.931	0.021	-0.113	8.637	0.034	0.137	12.818	2.642	3.528
50C Tank D LS10	2021-09-01 17:03:00	1.45	0.003	26.973	0.003	27.91	0.036	-0.119	55.493	0.197	0.777	35.818	5.584	-18.447
50C Tank A OH27	2021-10-21 14:27:00	-27.49	0.003	-10.923	0.008	-38.92	0.027	-0.108	-22.062	0.087	-0.342	-72.127	11.616	-23.225
50C Tank D ls3	2021-10-21 17:40:00	0.819	0.004	3.911	0.007	4.551	0.047	-0.14	7.87	0.074	0.031	19.4	9.603	10.731
50C Tank D LS10	2021-10-21 21:19:00	1.272	0.005	26.495	0.01	27.238	0.03	-0.131	54.328	0.142	0.603	72.974	11.147	17.886
TD LS3 50	2021-11-30 11:27:00	1.062	0.005	4.49	0.005	5.382	0.031	-0.131	8.686	0.144	-0.312	1.852	1.092	-8.049
LS10 TD 50	2021-12-25 14:07:00	1.586	0.004	26.529	0.007	27.647	0.038	-0.09	54.165	0.144	0.383	54.297	5.914	-0.233
TA OH27 50	2021-12-25 17:48:00	-27.277	0.007	-10.686	0.003	-38.474	0.039	-0.107	-21.416	0.075	-0.19	-45.617	2.782	3.972
LS3 TD 50	2021-12-27 12:34:00	1.047	0.005	4.473	0.002	5.353	0.023	-0.128	9.087	0.129	0.06	39.142	11.16	28.923
TD LS10 50C	2022-02-07 11:35:00	1.578	0.012	26.792	0.023	27.936	0.014	-0.053	54.885	0.07	0.553	80.965	5.849	24.548
TA OH27 50C	2022-02-05 18:45:00	-27.411	0.021	-10.738	0.038	-38.7	0.053	-0.148	-21.667	0.079	-0.314	-66.132	7.073	-17.363
LS3 TD 50C	2022-02-05 13:50:00	1.011	0.024	4.823	0.045	5.69	0.056	-0.097	9.744	0.105	0.073	14.448	5.687	3.823
50C TANK A OH27	2022-03-10 11:44:00	-27.431	0.037	-10.838	0.08	-38.813	0.091	-0.145	-21.894	0.126	-0.343	-73.07	6.799	-24.447
50C TANK D LS3	2022-03-10 15:13:00	1.571	0.032	26.989	0.065	28.091	0.069	-0.082	55.341	0.1	0.602	83.841	8.164	26.896
50C TANKD LS10	2022-03-10 23:40:00	0.977	0.031	4.047	0.063	4.885	0.079	-0.103	8.138	0.115	0.028	14.594	4.971	5.53
LS3 TD 50C	2022-04-13 12:24:00	1.066	0.006	4.511	0.013	5.442	0.034	-0.096	9.108	0.098	0.066	14.532	5.949	4.461
LS10 TD 50C	2022-04-13 17:28:00	1.638	0.009	27.182	0.019	28.358	0.018	-0.076	55.757	0.116	0.62	73.781	5.677	16.917
OH27 TA 50C	2022-04-13 22:26:00	-27.428	0.015	-10.677	0.032	-38.627	0.044	-0.115	-21.47	0.096	-0.235	-49.946	6.244	-0.435
TA OH27 50C	2022-04-18 15:48:00	-27.391	0.014	-10.48	0.028	-38.414	0.035	-0.129	-21.124	0.096	-0.28	-52.877	5.408	-3.949
TA OH27 50C	2022-04-30 14:28:00	-27.451	0.017	-10.922	0.033	-38.872	0.042	-0.101	-22.023	0.162	-0.305	-57.95	5.353	-8.348
DLS10 50C	2022-05-24 13:11:00	1.689	0.034	27.233	0.064	28.445	0.116	-0.094	55.695	0.113	0.461	59.881	4.451	3.598
DLS3 50C	2022-05-24 18:22:00	1.118	0.035	4.232	0.068	5.211	0.112	-0.106	8.505	0.16	0.023	10.289	3.458	0.75
TA OH27 50C	2022-05-25 00:17:00	-27.339	0.025	-11.012	0.051	-38.851	0.082	-0.11	-22.187	0.125	-0.292	-50.088	3.609	-0.017
DLS10 50C	2022-07-05 12:05:00	1.605	0.053	26.83	0.097	27.928	0.106	-0.124	54.961	0.165	0.551	54.69	7.016	-0.456
TA OH27 50C	2022-07-05 17:34:00	-27.369	0.032	-10.846	0.051	-38.668	0.065	-0.053	-21.811	0.07	-0.242	-50.768	7.833	-1.028
DLS3 50C	2022-07-06 00:38:00	1.055	0.047	4.434	0.078	5.337	0.096	-0.113	8.987	0.193	0.099	10.557	7.386	0.689
TD OH 25 50C	2022-07-14 12:30:00	0.509	0.07	-3.254	0.132	-2.763	0.164	-0.091	-6.522	0.191	-0.025	-10.694	9.247	-4.881
TA OH26 50C	2022-08-05 17:03:00	-27.159	0.005	-2.89	0.005	-30.945	0.034	-0.142	-5.976	0.106	-0.207	-33.702	4.953	0.834
DLS10 50C	2022-08-06 00:05:00	1.674	0.011	26.987	0.01	28.127	0.038	-0.152	54.945	0.12	0.23	49.594	3.221	-5.657
DLS3 50C	2022-08-06 12:22:00	1.078	0.006	4.393	0.015	5.269	0.05	-0.165	8.843	0.147	0.037	17.913	6.435	8.026
DLS10 50C	2022-08-08 11:58:00	1.035	0.039	4.767	0.076	5.638	0.102	-0.119	9.598	0.128	0.042	13.209	3.969	2.683
DLS3 50C	2022-09-16 13:21:00	1.098	0.005	4.65	0.007	5.59	0.017	-0.117	9.375	0.077	0.052	11.968	5.595	1.615
TAOH25 50C	2022-09-16 18:12:00	-27.063	0.005	-2.845	0.006	-30.755	0.024	-0.092	-5.671	0.086	0.011	-32.442	4.625	1.945
DLS10 50C	2022-09-17 00:24:00	1.566	0.006	26.828	0.008	27.893	0.022	-0.117	54.54	0.109	0.155	54.228	3.003	-0.849
DLS3 50C	2022-10-31 12:30:00	1.054	0.019	4.494	0.047	5.435	0.089	-0.074	9.087	0.165	0.077	9.998	2.627	0.017
TA OH25 50C	2022-10-31 17:45:00	-27.049	0.015	-2.643	0.04	-30.56	0.07	-0.105	-5.275	0.141	0.004	-35.787	4.314	-1.932
DLS10 50C	2022-10-31 23:34:00	1.699	0.015	27.593	0.039	28.826	0.068	-0.078	56.05	0.166	0.097	44.983	8.803	-11.198
TD-LS10-50	2023-01-26 13:27:00	1.643	0.001	27.749	0.002	28.863	0.028	-0.132	56.448	0.148	0.171	31.372	1.583	-24.309
TD-LS3-50	2023-01-26 16:56:00	0.964	0.002	3.786	0.005	4.57	0.03	-0.149	7.552	0.143	-0.034	6.491	1.847	-1.978
TD LS10 50	2023-02-20 16:23:00	1.73	0.002	26.612	0.002	27.826	0.029	-0.144	54.323	0.118	0.371	35.921	5.192	-17.966
TA 50	2023-02-21 10:58:00	-26.934	0	-7.79	0.003	-35.304	0.048	-0.051	-15.746	0.091	-0.167	-26.135	3.05	18.22
TD LS3 50	2023-02-22 11:20:00	1.049	0.002	4.738	0.003	5.613	0.032	-0.13	9.58	0.044	0.081	6.677	3.03	-3.74
TA WICO 50	2023-03-31 11:53:00	-27.029	0.002	-7.056	0.002	-34.811	0.024	-0.165	-14.176	0.177	-0.116	-19.369	4.662	23.914
TD LS3 50	2023-03-31 14:57:00	1.062	0.001	4.811	0.001	5.715	0.04	-0.114	9.707	0.094	0.061	7.586	4.79	-2.997
TD LS10 50	2023-03-31 16:42:00	-25.437	0.006	26.82	0.009	-0.755	0.053	-0.123	54.782	0.18	0.401	14.191	4.736	-10.252
DLS3 50C	2023-05-10 21:59:00	1.122	0.002	4.805	0.006	5.747	0.032	-0.138	9.8	0.099	0.166	6.617	1.618	-4.008
TA WICO 50C	2023-05-11 13:54:00	-27.162	0.002	-7.78	0.004	-35.525	0.016	-0.048	-15.654	0.061	-0.158	-14.165	1.15	30.973
DLS10 50C	2023-05-11 17:57:00	1.758	0.004	27.469	0.005	28.716	0.032	-0.126	56.238	0.135	0.516	39.924	3.465	-15.814
HEATED TANK A	2021-07-28 07:31:00	-27.341	0.003	-6.826	0.004	-35.533	0.039	-0.809	-14.107	0.034	-0.509	-34.136	3.177	8.385
HEATED TANK D	2021-07-29 08:51:00	0.553	0.003	-1.657	0.005	-1.851	0.023	-0.794	-3.605	0.12	-0.295	0.223	6.622	2.894
HEATED TANK DLS3	2021-07-29 11:55:00	0.941	0.001	5.605	0.003	5.609	0.026	-0.869	11.101	0.123	-0.139	7.982	6.504	-4.022
HEATED TANK DLS9	2021-07-29 14:57:00	1.367	0.004	18.793	0.005	19.04	0.025	-0.842	38.22	0.103	0.272	25.263	6.352	-12.986
HEATED TANK DLS10	2021-07-30 07:51:00	1.319	0.004	24.207	0.004	24.335	0.024	-0.817	49.419	0.183	0.4	39.318	9.118	-9.762
Heated Tank A	2021-09-02 11:35:00	-27.513	0.002	-7.154	0.004	-36.081	0.034	-0.87	-14.809	0.057	-0.56	-27.003	3.215	16.684
Heated Tank D	2021-09-02 14:32:00	0.576	0.001	-1.572	0.002	-1.832	0.018	-0.882	-3.488	0.101	-0.348	-0.506	2.114	1.97
Heated Tank D LS9	2021-09-02 17:38:00	1.237	0.003	16.771	0.004	16.894	0.031	-0.865	33.996	0.146	0.166	18.539	5.406	-15.491
HEATED tank Dls10	2021-09-03 12:40:00	1.077	0.001	23.784	0.003	23.629	0.019	-0.85	48.501	0.101	0.351	28.784	4.151	-18.75
heated gas tank d ls3	2021-09-03 15:53:00	0.949	0.001	6.072	0.005	6.068	0.027	-0.878	12.046	0.118	-0.133	5.634	3.66	-7.256
Heated Tank A	2021-10-22 12:13:00	-27.382	0.004	-6.819	0.007	-35.631	0.027	-0.874	-14.075	0.116	-0.49	-74.394	19.351	-33.615
Heated Tank D	2021-10-22 15:12:00	0.604	0.004	-1.339	0.01	-1.586	0.029	-0.894	-3.071	0.128	-0.397	-9.633	10.26	-7.664
Heated Tank D LS10	2021-10-23 02:23:00	1.089	0.004	20.895	0.011	20.787	0.021	-0.867	42.637	0.16	0.394	54.509	8.379	11.369
Heated Tank D LS3	2021-10-26 11:05:00	0.927	0.003	4.808	0.003	4.798	0.029	-0.883	9.447	0.082	-0.19	12.715	6.311	2.228
HEATED DLS9	2021-12-01 02:40:00	1.177	0.006	14.317	0.012	14.455	0.038	-0.83	28.404	0.295	-0.423	15.568	2.104	-13.63
TD 1000	2021-12-01 16:40:00	0.66	0.003	-1.558	0.005	-1.691	0.022	-0.843	-3.284	0.175	-0.172	0.243	1.899	2.603
TD LS3	2021-12-01 22:40:00	1.045	0.002	2.994	0.002	3.195	0.042	-0.825	5.834	0.201	-0.161	5.533	1.529	-1.467
HEATED TANK A	2021-12-02 21:34:00	-27.285	0.005	-6.774	0.002	-35.451	0.03	-0.835	-13.55	0.151	-0.049	-8.413	1.944	35.071
TD 1000	2021-12-05 14:57:00	0.874	0.008	0.015	0.013	0.027	0.1	-0.889	-0.251	0.356	-0.28	2.754	10.277	1.79
TA 1000	2021-12-06 18:29:00	-27.302	0.005	-6.991	0.005	-35.698	0.021	-0.857	-14.097	0.127	-0.166	-11.872	2.442	31.923
HEATED TD LS10	2021-12-06 21:52:00	-27.283	0.005	-6.85	0.006	-35.532	0.036	-0.845	-13.868	0.133	-0.219	-16.295	3.069	26.994
TANK A HEATED	2021-12-26 19:21:00	-27.224	0.007	-6.47	0.001	-35.109	0.046	-0.846	-13.41	0.117	-0.519	-40.074	4.865	1.35
HEATED TD LS10	2021-12-26 22:44:00	1.172	0.005	23.73	0.005	23.693	0.028	-0.835	48.201	0.046	0.17	47.272	1.035	-1.115
HEATED TD OH27	2021-12-27 02:22:00	0.595	0.004	-6.733	0.004	-6.712	0.414	-0.71	-13.81	0.133	-0.395	-14.591	6.243	-2.063
HEATED DLS9	2021-12-27 20:57:00	1.318	0.006	14.559	0.005	14.794	0.063	-0.876	29.283	0.111	-0.045	31.001	6.377	0.74
HEATED DLS3	2021-12-28 00:09:00	1.179	0.005	6.033	0.004	6.287	0.029	-0.859	11.893	0.21	-0.207	12.281	9.998	-0.865
HEATED TANK D	2021-12-28 13:28:00	0.699	0.005	-1.507	0.002	-1.61	0.019	-0.851	-3.302	0.172	-0.291	-3.511	8.67	-1.3
HEATED THANK D LS3	2022-02-11 11:21:00	1.015	0.025	5.562	0.043	5.709	0.044	-0.805	11.048	0.108	-0.105	11.174	4.311	-0.864
Heated Tank A	2022-02-08 11:18:00	-27.358	0.013	-6.374	0.028	-35.192	0.019	-0.885	-13.211	0.146	-0.511	-67.615	7.625	-27.421
Heated DLS9	2022-02-07 18:54:00	1.085	0.019	8.212	0.037	8.363	0.061	-0.828	16.464	0.08	-0.028	27.176	6.163	9.639
Heated DLS10	2022-02-07 15:43:00	0.772	0.021	7.563	0.036	7.379	0.041	-0.848	15.1	0.13	-0.082	39.803	6.948	23.687
HEATED TANK D OH27	2022-02-11 14:14:00	0.503	0.029	-6.622	0.052	-6.876	0.052	-0.89	-13.576	0.108	-0.38	-16.345	6.579	-3.96
HEATED TANK D	2022-02-11 17:29:00	0.644	0.016	-1.71	0.03	-1.893	0.036	-0.876	-3.735	0.123	-0.318	-4.603	4.332	-1.937
DLS9 HEATED	2022-03-12 14:35:00	0.825	0.026	-0.683	0.054	-0.678	0.071	-0.858	-1.61	0.134	-0.245	-1.545	7.464	-1.084
HEATED TANK A	2022-03-12 17:39:00	-27.337	0.028	-6.19	0.056	-35.007	0.068	-0.897	-12.851	0.143	-0.516	-58.692	7.478	-18.493
HEATED TANK D	2022-03-13 00:01:00	0.679	0.019	-1.072	0.037	-1.216	0.049	-0.863	-2.442	0.087	-0.299	-3.296	7.816	-1.918
TDLS11 HEATED	2022-03-26 11:50:00	1.18	0.004	11.939	0.007	12.142	0.022	-0.81	24.186	0.112	0.161	41.492	5.817	16.217
OH27 TD HEATED	2022-03-26 17:04:00	-27.105	0.005	-5.833	0.012	-34.401	0.021	-0.868	-12.004	0.101	-0.375	-56.922	5.539	-17.589
DLS9 HEATED	2022-04-15 13:24:00	0.566	0.017	-7.215	0.033	-7.337	0.046	-0.833	-14.736	0.1	-0.364	-19.012	4.944	-5.563
DLS3 HEATED	2022-04-24 23:13:00	0.855	0.026	-0.221	0.049	-0.176	0.053	-0.841	-0.755	0.102	-0.313	-3.652	5.125	-4.128
TANK A HEATED	2022-04-17 00:07:00	-27.298	0.017	-6.309	0.033	-35.044	0.04	-0.859	-13.068	0.13	-0.496	-47.542	4.345	-6.674
TANK D HEATED	2022-04-17 21:52:00	0.673	0.025	-0.834	0.048	-0.982	0.061	-0.857	-1.937	0.096	-0.27	-0.508	3.962	0.413
DLS10 HEATED	2022-04-24 12:48:00	0.662	0.007	6.032	0.013	5.747	0.044	-0.862	12.037	0.153	-0.063	10.79	7.376	-1.784
TA OH27 HEATED	2022-04-24 17:48:00	-27.213	0.016	-6.773	0.033	-35.409	0.047	-0.869	-13.912	0.075	-0.418	-47.806	7.774	-6.133
HEATED TANK A	2022-05-28 01:27:00	-27.244	0.023	-6.311	0.052	-34.961	0.094	-0.828	-12.962	0.192	-0.385	-45.46	3.698	-4.559
HEATED DLS10	2022-05-28 13:31:00	0.889	0.021	10.68	0.045	10.607	0.073	-0.804	21.547	0.14	0.07	20.465	5.199	-1.553
HEATED TA OH27	2022-06-05 17:16:00	-27.248	0.022	-7.839	0.035	-36.446	0.049	-0.853	-16.058	0.166	-0.449	-46.341	5.763	-2.466
HEATED DLS3	2022-06-06 00:12:00	0.777	0.026	-4.31	0.049	-4.324	0.069	-0.891	-9.008	0.158	-0.41	-9.041	4.646	-1.428
HEATED TANK D	2022-05-29 19:42:00	0.755	0.024	-0.826	0.053	-0.871	0.109	-0.839	-1.891	0.182	-0.241	-5.001	4.962	-4.188
HEATED DLS9	2022-06-12 20:33:00	0.708	0.016	6.548	0.032	6.293	0.044	-0.87	12.935	0.444	-0.2	12.346	8.176	-1.303
HEATED TANK D	2022-06-06 11:19:00	0.668	0.014	-1.389	0.026	-1.553	0.041	-0.878	-3.116	0.126	-0.342	-4.749	11.37	-2.741
HEATED DLS10	2022-06-13 00:39:00	0.947	0.022	3.831	0.044	3.843	0.059	-0.899	7.476	0.09	-0.199	9.677	6.069	1.111
HEATED TA OH27	2022-07-07 00:18:00	-27.238	0.038	-7.056	0.067	-35.594	0.078	-0.754	-14.393	0.141	-0.337	-37.724	6.251	4.979
HEATED DLS10	2022-07-08 22:06:00	0.523	0.051	3.392	0.088	3.036	0.109	-0.835	6.626	0.167	-0.168	3.12	6.722	-4.086
HEATED TANK D	2022-07-09 23:16:00	0.653	0.059	-0.897	0.106	-1.029	0.132	-0.821	-2.096	0.164	-0.303	-5.494	5.686	-4.433
HEATED TANK A	2022-07-10 18:32:00	-27.362	0.046	-6.219	0.086	-34.937	0.124	-0.77	-12.815	0.139	-0.421	-51.105	9.485	-10.498
HEATED DLS3	2022-07-10 23:51:00	0.924	0.051	-0.242	0.094	-0.135	0.119	-0.85	-0.766	0.179	-0.282	0.327	6.793	-0.185
HEATED TA OH27	2022-07-11 19:33:00	-27.308	0.049	-7.149	0.092	-35.788	0.118	-0.789	-14.468	0.201	-0.224	-36.77	3.112	6.24
TA OH26 HEATED	2022-08-07 18:54:00	-27.015	0.011	-3.885	0.018	-32.483	0.042	-0.903	-8.182	0.182	-0.431	-32.841	8.614	3.531
TANK D HEATED	2022-08-08 00:20:00	0.76	0.031	-0.608	0.061	-0.696	0.074	-0.883	-1.54	0.127	-0.324	-2.459	4.343	-2.077
TANK A HEATED	2022-08-08 17:49:00	-27.268	0.063	-6.584	0.124	-35.256	0.159	-0.839	-13.443	0.249	-0.322	-47.523	4.945	-6.148
DLS3 HEATED	2022-08-09 00:24:00	0.942	0.028	-2.799	0.053	-2.69	0.072	-0.911	-5.976	0.135	-0.388	-5.328	6.493	-0.841
DLS10 HEATED	2022-08-13 00:04:00	1.108	0.027	12.857	0.061	12.908	0.087	-0.87	25.804	0.105	-0.073	25.698	2.589	-0.897
HEATED TAOH 25	2022-09-18 20:14:00	-26.995	0.01	-0.907	0.012	-29.562	0.016	-0.841	-2.078	0.069	-0.266	-31.177	3.334	-0.637
HEATED DLS10	2022-09-19 00:21:00	0.849	0.006	7.106	0.007	6.995	0.027	-0.863	14.034	0.139	-0.226	13.373	3.542	-1.527
HEATED DLS3	2022-09-19 18:51:00	1.038	0.006	4.467	0.009	4.627	0.025	-0.835	8.886	0.125	-0.069	14.601	3.779	4.644
HEATED DLS9	2022-09-20 01:13:00	1.266	0.006	9.969	0.007	10.277	0.018	-0.828	19.911	0.099	-0.124	28.286	4.215	7.087
HEATED TANK A	2022-09-20 18:52:00	-27.292	0.006	-6.166	0.005	-34.867	0.028	-0.823	-12.579	0.108	-0.288	-44.337	4.02	-3.62
HEATED TANK D	2022-09-21 00:39:00	0.773	0.007	-0.142	0.008	-0.202	0.025	-0.86	-0.552	0.094	-0.267	-1.375	3.483	-1.92
HEATED DLS10	2022-11-07 22:58:00	0.947	0.019	8.637	0.037	8.644	0.074	-0.821	17.332	0.15	-0.017	19.771	2.829	1.679
HEATED TA OH25	2022-11-08 18:11:00	-26.863	0.017	-1.48	0.04	-29.937	0.078	-0.805	-3.012	0.146	-0.054	-30.063	5.216	1.494
HEATED DLS9	2022-11-09 00:14:00	0.975	0.038	-2.48	0.048	-2.259	0.091	-0.828	-4.953	0.162	0.001	1.313	3.952	5.161
HEATED DLS3	2022-11-09 20:25:00	1.357	0.019	11.084	0.044	11.511	0.091	-0.786	22.23	0.167	-0.06	23.9	3.92	0.523
HEATED TANK A	2022-11-10 00:20:00	-27.241	0.026	-6.202	0.051	-34.875	0.097	-0.85	-12.614	0.194	-0.252	-46.249	4.335	-5.599
HEATED TANK D	2022-11-10 18:39:00	0.773	0.019	-0.352	0.041	-0.409	0.083	-0.861	-0.907	0.167	-0.202	1.863	3.196	1.73
TD-LS3-1000	2023-01-27 09:03:00	1.094	0.003	2.497	0.002	2.715	0.027	-0.868	4.676	0.074	-0.323	9.424	1.4	3.319
TD-LS10-1000	2023-01-27 11:49:00	0.915	0.003	20.16	0.005	19.822	0.01	-0.926	40.495	0.235	-0.222	24.67	2.759	-15.676
TD1000	2023-01-27 14:19:00	0.956	0.001	-0.828	0.006	-0.717	0.04	-0.89	-2.012	0.142	-0.358	-1.417	2.961	-0.811
TA1000	2023-01-27 16:32:00	-27.093	0.002	-6.287	0.002	-34.762	0.018	-0.806	-12.875	0.155	-0.346	-17.994	1.989	23.865
TA 1000	2023-02-21 08:09:00	-27.304	0.002	-6.852	0.002	-35.521	0.028	-0.81	-13.989	0.107	-0.336	-26.253	2.556	16.624
TD 1000	2023-02-22 08:27:00	0.74	0.002	-0.373	0.002	-0.461	0.03	-0.857	-1.008	0.18	-0.293	1.79	3.401	1.734
TD LS10 1000	2023-02-23 06:27:00	1.586	0.003	22.614	0.004	22.969	0.015	-0.898	45.855	0.124	0.112	31.995	6.291	-14.012
TA 1000	2023-03-31 08:52:00	-27.284	0.003	-7.143	0.004	-35.827	0.037	-0.863	-14.554	0.159	-0.325	-17.586	5.155	26.239
TD LS3 1000	2023-04-01 10:35:00	1.164	0.003	5.987	0.005	6.261	0.034	-0.825	11.932	0.08	-0.077	12.746	4.273	-0.3
TA LS10 1000	2023-04-02 09:58:00	-25.396	0.002	21.294	0.002	-6.206	0.017	-0.338	43.511	0.094		11.294	2.79	-2.619
TD 1000	2023-04-03 09:04:00	0.706	0.002	-1.076	0.003	-1.201	0.036	-0.872	-2.488	0.076	-0.339	-4.181	3.657	-2.826
TA 1000	2023-05-12 10:49:00	-27.253	0.004	-6.742	0.007	-35.337	0.024	-0.783	-13.863	0.097	-0.43	-14.691	2.372	28.414
HEATED TD LS3	2023-05-12 23:50:00	0.582	0.003	-2.703	0.006	-2.927	0.034	-0.872	-5.566	0.114	-0.167	-0.803	0.77	3.899
TD 1000	2023-05-13 10:57:00	0.724	0.003	-0.836	0.005	-0.94	0.023	-0.865	-2.02	0.106	-0.35	-0.545	2.878	0.325
